# Supplementary material for: Molecular characterization of Tetragonia tetragonoides (Pall.) aquaporin (AQP) members and their roles in the response to combined high salinity-alkalinity-drought and heat stress
Source: Research Square preprint supplement (doi:10.21203/rs.3.rs-7136705/v1), 2025-07-30
Supplement: Supplementary file 1 [file 1a591160cdbff185c93c3f5c.xlsx]

## Sheet: TtAQPs' duplication patterns
15 PIPs
TtPIP1;1	Tt03G0018570	WGD
TtPIP1;2	Tt16G0004630	WGD
TtPIP1;3	Tt04G0019610	WGD
TtPIP1;4	Tt06G0022590	WGD
TtPIP1;5	Tt07G0003660	WGD
TtPIP2;1	Tt01G0010040	WGD
TtPIP2;2	Tt11G0009920	WGD
TtPIP2;3	Tt01G0015190	DD
TtPIP2;4	Tt11G0014700	DD
TtPIP2;5	Tt07G0003670	TD
TtPIP2;6	Tt13G0020820	WGD
TtPIP2;7	Tt07G0020280	WGD
TtPIP2;8	Tt13G0000270	WGD
TtPIP2;9	Tt01G0010050	WGD
TtPIP2;10	Tt11G0009910	WGD
18 TIPs
TtTIP1;1	Tt01G0009310	WGD
TtTIP1;2	Tt11G0010640	WGD
TtTIP1;3	Tt03G0000820	WGD
TtTIP1;4	Tt04G0000850	WGD
TtTIP1;5	Tt09G0011690	WGD
TtTIP1;6	Tt15G0007390	WGD
TtTIP2;1	Tt07G0018250	WGD
TtTIP2;2	Tt13G0002320	WGD
TtTIP2;3	Tt04G0023790	WGD
TtTIP2;4	Tt06G0013740	WGD
TtTIP2;5	Tt04G0023800	TD
TtTIP2;6	Tt06G0013750	TD
TtTIP3;1	Tt05G0011610	DD
TtTIP3;2	Tt12G0014560	DD
TtTIP4;1	Tt09G0007910	WGD
TtTIP4;2	Tt15G0011210	WGD
TtTIP5;1	Tt06G0009470	WGD
TtTIP5;2	Tt13G0013390	WGD
19 NIPs
TtNIP1;1	Tt08G0012500	WGD
TtNIP1;2	Tt10G0005880	WGD
TtNIP2;1	Tt03G0021270	TD
TtNIP2;2	Tt03G0021280	WGD
TtNIP2;3	Tt03G0021260	WGD
TtNIP3;1	Tt11G0017300	DD
TtNIP4;1	Tt03G0021290	WGD
TtNIP4;2	Tt16G0007250	WGD
TtNIP5;1	Tt03G0015410	WGD
TtNIP5;2	Tt16G0010870	WGD
TtNIP6;1	Tt07G0016040	WGD
TtNIP6;2	Tt13G0004320	WGD
TtNIP7;1	Tt04G0020740	WGD
TtNIP7;2	Tt04G0020840	PD
TtNIP7;3	Tt06G0021490	WGD
TtNIP8;1	Tt06G0018640	WGD
TtNIP8;2	Tt06G0018660	PD
TtNIP8;3	Tt10G0007570	WGD
TtNIP8;4	Tt13G0018950	WGD
4 SIPs
TtSIP1;1	Tt09G0010400	WGD
TtSIP1;2	Tt15G0008730	WGD
TtSIP2;1	Tt02G0020900	WGD
TtSIP2;2	Tt14G0020550	WGD
2 XIPs
TtXIP1;1	Tt07G0019520	WGD
TtXIP1;2	Tt13G0001000	WGD

## Sheet: Note
WGD	whole genome duplication
TD	tandem duplication (two adjacent duplicate genes)
PD	proximal duplication (repeated genes within a 10-gene interval)
TRD	transposed duplication (repetitive genes composed of ancestors and new loci)
DD	dispersed duplication (repetitive genes that are neither adjacent nor collinear)
SL	single
