# Supplementary material for: Molecular characterization of Tetragonia tetragonoides (Pall.) aquaporin (AQP) members and their roles in the response to combined high salinity-alkalinity-drought and heat stress
Source: Research Square preprint supplement (doi:10.21203/rs.3.rs-7136705/v1), 2025-07-30
Supplement: Supplementary file 2 [file 1bb92441eeb0fbaf88208ab5.xlsx]

## Sheet: TtAQPs ka ks values
PIP
TtPIP1;1	Ka	Ks	Ka/Ks
TtPIP1;1__TtPIP1;4	0.0528	1.1672	0.0452365
TtPIP1;1__TtPIP1;3	0.0578	1.0338	0.0559102
TtPIP1;1__TtXIP1;1	0.7182	55.5112	0.0129379
TtPIP1;2
TtPIP1;2__TtPIP1;1	0.0043	0.0677	0.0635155
TtPIP1;2__TtPIP1;4	0.0486	1.0971	0.0442986
TtPIP1;2__TtPIP1;3	0.0535	0.9743	0.0549112
TtPIP1;2__TtXIP1;1	0.7188	55.4806	0.0129559
TtPIP1;3
TtPIP1;3__TtPIP1;4	0.0059	0.1264	0.0466772
TtPIP1;3__TtXIP1;1	0.6955	58.0484	0.0119814
TtPIP1;4
TtPIP1;4__TtXIP1;1	0.682	58.5085	0.0116564
TtPIP1;5
TtPIP1;5__TtPIP2;5	0.107	0.5199	0.205809
TtPIP2;1
TtPIP2;1__TtPIP2;9	0.1183	0.4536	0.260802
TtPIP2;2
TtPIP2;2__TtPIP2;1	0.0078	0.0909	0.0858086
TtPIP2;2__TtPIP2;9	0.1174	0.4805	0.244329
TtPIP2;3
TtPIP2;3__TtPIP2;5	0.1016	3.1941	0.0318086
TtPIP2;3__TtPIP1;5	0.184	18.2102	0.0101042
TtPIP2;4
TtPIP2;4__TtPIP2;3	0.0133	0.0729	0.182442
TtPIP2;4__TtPIP2;6	0.0915	3.5232	0.0259707
TtPIP2;4__TtPIP2;5	0.091	3.6989	0.0246019
TtPIP2;4__TtPIP1;5	0.1719	25.3676	0.00677636
TtPIP2;6
TtPIP2;6__TtPIP2;5	0.0002	0.1921	0.00104112
TtPIP2;6__TtPIP2;3	0.1021	3.2525	0.0313912
TtPIP2;6__TtPIP1;5	0.1066	0.5993	0.177874
TtPIP2;8
TtPIP2;8__TtPIP2;7	0.0048	0.0393	0.122137
TtPIP2;10
TtPIP2;10__TtPIP2;9	0.0724	0.1196	0.605351
TtPIP2;10__TtPIP2;2	0.1837	0.5046	0.364051
TtPIP2;10__TtPIP2;1	0.1855	0.4896	0.378881
TIP
TtTIP1;1
TtTIP1;1__TtTIP1;3	0.1584	10.2977	0.0153821
TtTIP1;1__TtTIP1;5	0.1617	6.6715	0.0242374
TtTIP1;1__TtTIP4;1	0.4336	55.6473	0.00779193
TtTIP1;1__TtTIP2;1	0.2156	3.2464	0.066412
TtTIP1;1__TtTIP2;4	0.2516	7.5757	0.0332115
TtTIP1;1__TtTIP2;3	0.2606	4.3565	0.0598187
TtTIP1;1__TtTIP2;5	0.2602	7.6435	0.034042
TtTIP1;1__TtTIP2;6	0.2563	7.2932	0.0351423
TtTIP1;1__TtTIP5;1	0.3752	53.5074	0.00701211
TtTIP1;2
TtTIP1;2__TtTIP1;1	0.0054	0.0793	0.0680958
TtTIP1;2__TtTIP1;4	0.1573	12.4025	0.0126829
TtTIP1;2__TtTIP1;3	0.158	5.7749	0.0273598
TtTIP1;2__TtTIP1;6	0.166	6.5338	0.0254063
TtTIP1;2__TtTIP1;5	0.162	5.925	0.0273418
TtTIP1;2__TtTIP4;2	0.386	40.9404	0.00942834
TtTIP1;2__TtTIP4;1	0.4368	56.0054	0.00779925
TtTIP1;2__TtTIP2;2	0.2116	10.5817	0.0199968
TtTIP1;2__TtTIP2;1	0.2146	5.2358	0.0409871
TtTIP1;2__TtTIP2;4	0.2476	20.7237	0.0119477
TtTIP1;2__TtTIP2;3	0.2553	16.6809	0.0153049
TtTIP1;2__TtTIP2;5	0.2581	11.2198	0.023004
TtTIP1;2__TtTIP2;6	0.2537	12.6134	0.0201135
TtTIP1;2__TtTIP5;1	0.3837	53.8003	0.00713193
TtTIP1;2__TtTIP5;2	0.4775	36.7477	0.012994
TtTIP1;3
TtTIP1;3__TtTIP1;4	0.0056	0.0551	0.101633
TtTIP1;3__TtTIP1;5	0.1361	2.7776	0.0489991
TtTIP1;3__TtTIP4;1	0.4785	3.1602	0.151414
TtTIP1;3__TtTIP2;1	0.2645	2.1234	0.124564
TtTIP1;3__TtTIP2;4	0.2874	6.972	0.041222
TtTIP1;3__TtTIP2;3	0.2875	5.1401	0.0559328
TtTIP1;3__TtTIP2;5	0.2873	3.4069	0.0843289
TtTIP1;3__TtTIP2;6	0.2817	4.0571	0.0694338
TtTIP1;3__TtTIP5;1	0.4044	5.7301	0.0705747
TtTIP1;4
TtTIP1;4__TtTIP1;5	0.1365	2.0582	0.0663201
TtTIP1;4__TtTIP4;1	0.485	2.57	0.188716
TtTIP1;4__TtTIP2;1	0.2703	2.0439	0.132247
TtTIP1;4__TtTIP2;4	0.2872	5.1953	0.0552807
TtTIP1;4__TtTIP2;3	0.287	4.3925	0.0653386
TtTIP1;4__TtTIP2;5	0.2916	4.0338	0.0722892
TtTIP1;4__TtTIP2;6	0.286	4.6975	0.0608834
TtTIP1;4__TtTIP5;1	0.4024	8.9392	0.0450152
TtTIP1;6
TtTIP1;6__TtTIP1;5	0.0113	0.1058	0.106805
TtTIP1;6__TtTIP1;4	0.1474	2.1243	0.0693876
TtTIP1;6__TtTIP1;3	0.1476	2.1235	0.0695079
TtTIP1;6__TtTIP1;1	0.1653	7.972	0.0207351
TtTIP1;6__TtTIP4;2	0.4168	1.5465	0.269512
TtTIP1;6__TtTIP4;1	0.472	1.9029	0.248042
TtTIP1;6__TtTIP2;1	0.2434	7.8414	0.0310404
TtTIP1;6__TtTIP2;4	0.2863	2.1467	0.133367
TtTIP1;6__TtTIP2;3	0.2762	1.8042	0.153087
TtTIP1;6__TtTIP2;5	0.2961	1.3632	0.21721
TtTIP1;6__TtTIP2;6	0.2995	1.403	0.213471
TtTIP1;6__TtTIP5;1	0.3819	8.6158	0.0443255
TtTIP2;1
TtTIP2;1__TtTIP4;1	0.4118	55.5059	0.00741903
TtTIP2;1__TtTIP1;5	0.2332	44.993	0.00518303
TtTIP2;2
TtTIP2;2__TtTIP2;1	0.0114	0.1181	0.0965284
TtTIP2;2__TtTIP2;4	0.2127	2.1544	0.0987282
TtTIP2;2__TtTIP2;3	0.2107	2.5858	0.0814835
TtTIP2;2__TtTIP2;5	0.2046	1.8124	0.112889
TtTIP2;2__TtTIP2;6	0.2095	1.8867	0.11104
TtTIP2;2__TtTIP4;2	0.3705	48.4968	0.00763968
TtTIP2;2__TtTIP4;1	0.4101	56.1707	0.00730096
TtTIP2;2__TtTIP1;1	0.2065	4.2315	0.0488007
TtTIP2;2__TtTIP1;4	0.2643	9.2412	0.0286002
TtTIP2;2__TtTIP1;3	0.2614	6.0735	0.0430394
TtTIP2;2__TtTIP1;6	0.246	11.1757	0.022012
TtTIP2;2__TtTIP1;5	0.2362	38.87	0.00607667
TtTIP2;2__TtTIP5;1	0.3745	4.872	0.0768678
TtTIP2;2__TtTIP5;2	0.4567	5.2548	0.086911
TtTIP2;3
TtTIP2;3__TtTIP2;4	0.0057	0.1469	0.0388019
TtTIP2;3__TtTIP2;5	0.0389	0.3271	0.118924
TtTIP2;3__TtTIP2;6	0.0453	0.3329	0.136077
TtTIP2;3__TtTIP2;1	0.1976	2.2357	0.088384
TtTIP2;3__TtTIP4;1	0.5113	2.0464	0.249853
TtTIP2;3__TtTIP1;5	0.283	1.8394	0.153855
TtTIP2;3__TtTIP5;1	0.3839	2.6818	0.14315
TtTIP2;4
TtTIP2;4__TtTIP2;6	0.0452	0.368	0.122826
TtTIP2;4__TtTIP2;1	0.2001	2.2929	0.0872694
TtTIP2;4__TtTIP4;1	0.5177	2.1258	0.243532
TtTIP2;4__TtTIP1;5	0.2849	2.0831	0.136767
TtTIP2;5
TtTIP2;5__TtTIP2;6	0.0058	0.0705	0.0822695
TtTIP2;5__TtTIP2;4	0.0388	0.3362	0.115407
TtTIP2;5__TtTIP2;1	0.1931	1.8502	0.104367
TtTIP2;5__TtTIP4;1	0.501	2.0211	0.247885
TtTIP2;5__TtTIP1;5	0.2932	1.4657	0.200041
TtTIP2;5__TtTIP5;1	0.3558	51.4211	0.00691934
TtTIP2;4
TtTIP2;4__TtTIP2;6	0.0452	0.368	0.122826
TtTIP2;6__TtTIP2;1	0.1979	1.9276	0.102667
TtTIP2;6__TtTIP4;1	0.5031	1.8072	0.278386
TtTIP2;6__TtTIP1;5	0.2964	1.4979	0.197877
TtTIP3;2
TtTIP3;2__TtTIP3;1	0.0001	0.0668	0.00149701
TtTIP4;1
TtTIP4;1__TtTIP1;5	0.4302	36.7747	0.0116983
TtTIP4;2
TtTIP4;2__TtTIP4;1	0.06	0.1668	0.359712
TtTIP4;2__TtTIP1;1	0.3828	42.2553	0.00905922
TtTIP4;2__TtTIP1;4	0.4197	3.0514	0.137543
TtTIP4;2__TtTIP1;3	0.4151	3.3048	0.125605
TtTIP4;2__TtTIP1;5	0.3976	2.0877	0.190449
TtTIP4;2__TtTIP2;1	0.3719	42.691	0.00871144
TtTIP4;2__TtTIP2;4	0.4475	1.8392	0.243312
TtTIP4;2__TtTIP2;3	0.4418	1.8613	0.237361
TtTIP4;2__TtTIP2;5	0.4343	1.7176	0.252853
TtTIP4;2__TtTIP2;6	0.4352	1.4848	0.293103
TtTIP4;2__TtTIP5;1	0.5794	20.0496	0.0288983
TtTIP5;1
TtTIP5;1__TtTIP4;1	0.6528	27.6428	0.0236156
TtTIP5;1__TtTIP1;5	0.3851	25.4969	0.0151038
TtTIP5;1__TtTIP2;1	0.369	4.3962	0.0839361
TtTIP5;1__TtTIP2;4	0.3876	13.6993	0.0282934
TtTIP5;1__TtTIP2;6	0.3567	51.0119	0.00699249
TtTIP5;2
TtTIP5;2__TtTIP5;1	0.0943	0.2363	0.399069
TtTIP5;2__TtTIP4;2	0.6441	16.8898	0.0381354
TtTIP5;2__TtTIP4;1	0.721	54.3562	0.0132644
TtTIP5;2__TtTIP1;1	0.4679	41.4275	0.0112944
TtTIP5;2__TtTIP1;4	0.485	14.5948	0.033231
TtTIP5;2__TtTIP1;3	0.4855	10.3305	0.0469968
TtTIP5;2__TtTIP1;6	0.474	2.3692	0.200068
TtTIP5;2__TtTIP1;5	0.4748	3.2338	0.146824
TtTIP5;2__TtTIP2;1	0.449	7.1187	0.0630733
TtTIP5;2__TtTIP2;4	0.4934	2.2388	0.220386
TtTIP5;2__TtTIP2;3	0.4803	1.5669	0.306529
TtTIP5;2__TtTIP2;5	0.4544	2.8635	0.158687
TtTIP5;2__TtTIP2;6	0.4552	2.8683	0.1587
NIP
TtNIP1;2
TtNIP1;2__TtNIP1;1	0.0031	0.0645	0.048062
TtNIP1;2__TtNIP4;2	0.2822	57.4926	0.00490846
TtNIP1;2__TtNIP4;1	0.2883	7.7977	0.0369724
TtNIP1;2__TtNIP3;1	0.4856	10.7322	0.045247
TtNIP3;1
TtNIP3;1__TtNIP4;2	0.4384	56.3887	0.00777461
TtNIP3;1__TtNIP4;1	0.4706	56.4409	0.00833793
TtNIP3;1__TtNIP1;1	0.4927	12.8789	0.0382564
TtNIP4;1
TtNIP4;1__TtNIP1;1	0.293	9.4722	0.0309326
TtNIP4;2
TtNIP4;2__TtNIP4;1	0.0154	0.1338	0.115097
TtNIP4;2__TtNIP1;1	0.2871	57.4653	0.00499606
TtNIP5;2
TtNIP5;2__TtNIP5;1	0.0065	0.0843	0.0771056
TtNIP6;2
TtNIP6;2__TtNIP6;1	0.0032	0.064	0.05
TtNIP7;1
TtNIP7;1__TtNIP7;3	0.0155	0.0852	0.181925
TtNIP7;2
TtNIP7;2__TtNIP7;1	0.0155	0.0852	0.181925
TtNIP8;3
TtNIP8;3__TtNIP8;4	0.0063	0.0053	1.18868
TtNIP8;3__TtNIP8;1	0.0273	0.0917	0.29771
TtNIP8;3__TtNIP8;2	0.0273	0.0917	0.29771
TtNIP8;4
TtNIP8;4__TtNIP8;1	0.0295	0.0857	0.344224
TtNIP8;4__TtNIP8;2	0.0295	0.0857	0.344224
SIP
TtSIP1;2__TtSIP1;1	0.0077	0.0715	0.107692
TtSIP2;2__TtSIP2;1	0.01	0.111	0.0900901
XIP
TtXIP1;2__TtXIP1;1	0.0065	0.0957	0.0679206

## Sheet: TtAQPs ka ks value-Ka>0.05-Ks<3
TtPIP1;1	Ka	Ks	Ka/Ks
TtPIP1;1__TtPIP1;4	0.0528	1.1672	0.0452365
TtPIP1;1__TtPIP1;3	0.0578	1.0338	0.0559102
TtPIP1;5
TtPIP1;5__TtPIP2;5	0.107	0.5199	0.205809
TtPIP2;1
TtPIP2;1__TtPIP2;9	0.1183	0.4536	0.260802
TtPIP2;2
TtPIP2;2__TtPIP2;9	0.1174	0.4805	0.244329
TtPIP2;6
TtPIP2;6__TtPIP1;5	0.1066	0.5993	0.177874
TtPIP2;10
TtPIP2;10__TtPIP2;9	0.0724	0.1196	0.605351
TtPIP2;10__TtPIP2;2	0.1837	0.5046	0.364051
TtPIP2;10__TtPIP2;1	0.1855	0.4896	0.378881
TtTIP1;3
TtTIP1;3__TtTIP1;5	0.1361	2.7776	0.0489991
TtTIP1;3__TtTIP2;1	0.2645	2.1234	0.124564
TtTIP1;4
TtTIP1;4__TtTIP1;5	0.1365	2.0582	0.0663201
TtTIP1;4__TtTIP4;1	0.485	2.57	0.188716
TtTIP1;4__TtTIP2;1	0.2703	2.0439	0.132247
TtTIP1;6
TtTIP1;6__TtTIP1;4	0.1474	2.1243	0.0693876
TtTIP1;6__TtTIP1;3	0.1476	2.1235	0.0695079
TtTIP1;6__TtTIP4;2	0.4168	1.5465	0.269512
TtTIP1;6__TtTIP4;1	0.472	1.9029	0.248042
TtTIP1;6__TtTIP2;4	0.2863	2.1467	0.133367
TtTIP1;6__TtTIP2;3	0.2762	1.8042	0.153087
TtTIP1;6__TtTIP2;5	0.2961	1.3632	0.21721
TtTIP1;6__TtTIP2;6	0.2995	1.403	0.213471
TtTIP2;2
TtTIP2;2__TtTIP2;1	0.0114	0.1181	0.0965284
TtTIP2;2__TtTIP2;4	0.2127	2.1544	0.0987282
TtTIP2;2__TtTIP2;3	0.2107	2.5858	0.0814835
TtTIP2;2__TtTIP2;5	0.2046	1.8124	0.112889
TtTIP2;2__TtTIP2;6	0.2095	1.8867	0.11104
TtTIP2;3
TtTIP2;3__TtTIP2;1	0.1976	2.2357	0.088384
TtTIP2;3__TtTIP4;1	0.5113	2.0464	0.249853
TtTIP2;3__TtTIP1;5	0.283	1.8394	0.153855
TtTIP2;3__TtTIP5;1	0.3839	2.6818	0.14315
TtTIP2;4
TtTIP2;4__TtTIP2;1	0.2001	2.2929	0.0872694
TtTIP2;4__TtTIP4;1	0.5177	2.1258	0.243532
TtTIP2;4__TtTIP1;5	0.2849	2.0831	0.136767
TtTIP2;5
TtTIP2;5__TtTIP2;1	0.1931	1.8502	0.104367
TtTIP2;5__TtTIP4;1	0.501	2.0211	0.247885
TtTIP2;5__TtTIP1;5	0.2932	1.4657	0.200041
TtTIP2;6
TtTIP2;6__TtTIP2;1	0.1979	1.9276	0.102667
TtTIP2;6__TtTIP4;1	0.5031	1.8072	0.278386
TtTIP2;6__TtTIP1;5	0.2964	1.4979	0.197877
TtTIP4;2
TtTIP4;2__TtTIP4;1	0.06	0.1668	0.359712
TtTIP4;2__TtTIP1;5	0.3976	2.0877	0.190449
TtTIP4;2__TtTIP2;4	0.4475	1.8392	0.243312
TtTIP4;2__TtTIP2;3	0.4418	1.8613	0.237361
TtTIP4;2__TtTIP2;5	0.4343	1.7176	0.252853
TtTIP4;2__TtTIP2;6	0.4352	1.4848	0.293103
TtTIP5;2
TtTIP5;2__TtTIP5;1	0.0943	0.2363	0.399069
TtTIP5;2__TtTIP1;6	0.474	2.3692	0.200068
TtTIP5;2__TtTIP2;4	0.4934	2.2388	0.220386
TtTIP5;2__TtTIP2;3	0.4803	1.5669	0.306529
TtTIP5;2__TtTIP2;5	0.4544	2.8635	0.158687
TtTIP5;2__TtTIP2;6	0.4552	2.8683	0.1587
TtNIP4;2
TtNIP4;2__TtNIP4;1	0.0154	0.1338	0.115097
TtNIP7;1
TtNIP7;1__TtNIP7;3	0.0155	0.0852	0.181925
TtNIP7;2
TtNIP7;2__TtNIP7;1	0.0155	0.0852	0.181925
TtNIP8;3
TtNIP8;3__TtNIP8;1	0.0273	0.0917	0.29771
TtNIP8;3__TtNIP8;2	0.0273	0.0917	0.29771
TtNIP8;4
TtNIP8;4__TtNIP8;1	0.0295	0.0857	0.344224
TtNIP8;4__TtNIP8;2	0.0295	0.0857	0.344224
