# Supplementary material for: Molecular characterization of Tetragonia tetragonoides (Pall.) aquaporin (AQP) members and their roles in the response to combined high salinity-alkalinity-drought and heat stress
Source: Research Square preprint supplement (doi:10.21203/rs.3.rs-7136705/v1), 2025-07-30
Supplement: Supplementary file 3 [file 79d30977514fcc623598650d.xlsx]

## Sheet: Primers
Primer name	Sequence (5'－3')	Purpose
TtTIP1;1-RTF	GGTGGACTTGCTGGACTTATC	Primer pair for qRT-PCR of TtTIP1;1 in T.tetragonioides
TtTIP1;1-RTR	CTGTGCTCGGGTAAGTTCTTTA
TtTIP1;2-RTF	GGGCTTGCTGGACTTATCTATG	Primer pair for qRT-PCR of TtTIP1;2 in T.tetragonioides
TtTIP1;2-RTR	GCCCGTGCTATTGACATTCT
TtTIP1;3-RTF	CCTGCTCTACCACATCGTATTC	Primer pair for qRT-PCR of TtTIP1;3 in T.tetragonioides
TtTIP1;3-RTR	ACTGCCTTCAAGCACATAGG
TtTIP1;4-RTF	CCTGCTCTACCACATCGTATTC	Primer pair for qRT-PCR of TtTIP1;4 in T.tetragonioides
TtTIP1;4-RTR	CAACTGCTTTCAAGCACATAGG
TtTIP2;1-RTF	GAGAGAGAGAGAGAGAGAGAGTAATG	Primer pair for qRT-PCR of TtTIP2;1 in T.tetragonioides
TtTIP2;1-RTR	AAGAGCCTACACCAGCAAAG
TtTIP2;2-RTF	GCTTGCCTTTGGGAGATTTG	Primer pair for qRT-PCR of TtTIP2;2 in T.tetragonioides
TtTIP2;2-RTR	AGCCAACACCAGCAAAGA
TtPIP1;1-RTF	TAGGGACTCTCACGTTCCTATC	Primer pair for qRT-PCR of TtPIP1;1 in T.tetragonioides
TtPIP1;1-RTR	TTGATGCCAGTGCCAGTAAT
TtPIP1;2-RTF	TAGGGACTCTCACGTTCCTATC	Primer pair for qRT-PCR of TtPIP1;2 in T.tetragonioides
TtPIP1;2-RTR	TTGATGCCAGTGCCAGTAAT
TtPIP2;1-RTF	GGACTCTCATGTTCCCGTATTG	Primer pair for qRT-PCR of TtPIP2;1 in T.tetragonioides
TtPIP2;1-RTR	GAAACTACGAGCCGGGTTAAT
TtPIP2;2-RTF	GAGGAGAGGCAAGAGACATAAC	Primer pair for qRT-PCR of TtPIP2;2 in T.tetragonioides
TtPIP2;2-RTR	CAGCCCTATAGAACGACCATTT
TtPIP2;7-RTF	GCCAGACCGTATCGTTGTTTA	Primer pair for qRT-PCR of TtPIP2;7 in T.tetragonioides
TtPIP2;7-RTR	CATCTCGTTGTTCATCCCTCTC
TtPIP2;8-RTF	GCTGAGATAATTGGCACCTTTG	Primer pair for qRT-PCR of TtPIP2;8 in T.tetragonioides
TtPIP2;8-RTR	CAATAGGGAGAGGAGCAAGAAC
TtSIP1;1-RTF	CCTTCGATGAACCCTGCTAAT	Primer pair for qRT-PCR of TtSIP1;1 in T.tetragonioides
TtSIP1;1-RTR	CCAATGAAGGGACAGATCCAATA
TtSIP1;2-RTF	TTGGCTGTCCTCATCATTATCC	Primer pair for qRT-PCR of TtSIP1;2 in T.tetragonioides
TtSIP1;2-RTR	CATTGAAGGTCCGGTGTAAGT
TtAct-RTF	ACCATCGGAGGTGAGAGGTT	Primer pair for qRT-PCR of reference gene TtACT-1α in T.tetragonioides
TtAct-RTR	CCACCACTGAGCACAATGTTACC
pYE-TtTIP1;2F	TACCGAGCTCGGATCC ATGCCTATCAGAGAGATTAG	Primer pair for construction of TtTIP1;2-pYES2 for functional verification in yeast
pYE-TtTIP1;2R	GATATCTGCAGAATTC TTAAGCAGAGAGTCTTTGG
pYE-TtTIP1;4F	TACCGAGCTCGGATCC ATGGCGATCCCAAGACTC	Primer pair for construction of TtTIP1;4-pYES2 for functional verification in yeast
pYE-TtTIP1;4R	GATATCTGCAGAATTC CTAGCGAGCTGAGGAGGG
pYE-TtTIP2;1F	TACCGAGCTCGGATCC ATGGCAGGACTTGCCTTTG	Primer pair for construction of TtTIP2;1-pYES2 for functional verification in yeast
pYE-TtTIP2;1R	GATATCTGCAGAATTC CTAGTAGTCATTAGAGAG
pYE-TtPIP1;1F	TACCGAGCTCGGATCC ATGGAGGGTAAGGAAGAGG	Primer pair for construction of TtPIP1;1-pYES2 for functional verification in yeast
pYE-TtPIP1;1R	GATATCTGCAGAATTC TCATGCCTTGGATTTGAATG
pYE-TtPIP2;1F	TACCGAGCTCGGATCC ATGGGAAAGGATTTTGAGGC	Primer pair for construction of TtPIP2;1-pYES2 for functional verification in yeast
pYE-TtPIP2;1R	GATATCTGCAGAATTC TCATACATTTGCAGAGCTC
pYE-TtPIP2;7F	TACCGAGCTCGGATCC ATGTCAAAGGAAGTGAGTG	Primer pair for construction of TtPIP2;7-pYES2 for functional verification in yeast
pYE-TtPIP2;7R	GATATCTGCAGAATTC TTAGTTGGTGGGGTTGCTAC
pYE-TtNIP1;2F	TACCGAGCTCGGATCC ATGGGTGAAATTGCAAGAGC	Primer pair for construction of TtNIP1;2-pYES2 for functional verification in yeast
pYE-TtNIP1;2R	GATATCTGCAGAATTC TTAGCGCTGTGAACCGTTAC
pYE-TtSIP1;2F	TACCGAGCTCGGATCC ATGGCAGCAGGAACAATAG	Primer pair for construction of TtSIP1;2-pYES2 for functional verification in yeast
pYE-TtSIP1;2R	GATATCTGCAGAATTC TTAGTCTGCTTTCCTGTTC

## Sheet: TtAQPs-CDSs
TtPIP1;1	ATGGAGGGTAAGGAAGAGGATGTTAGACTAGGAGCCAACAAGTACTCAGAGAGGCAACCACTGGGTACAGTGGCTCAGGACAGAGACTACAGAGAGCCACCGGCTGCACCGTTCTTTGAGGCCGGTGAGCTGACGTCATGGTCCTTTTACCGTGCTGGAATTGCTGAGTTCATAGCCACCTTTTTGTTCCTTTACATCTCAATTTTGACTGTTATGGGAGTTAACAGGTCACCTTCAAAGTGTGGTACTGTTGGTATTCAGGGTATTGCCTGGGCTTTTGGTGGCATGATCTTTGCTCTTGTTTACTGTACTGCTGGAATTTCAGGAGGTCACATTAACCCAGCAGTGACATTTGGGCTATTCTTGGCAAGGAAGTTGTCCTTGACAAGGGCAGTGTTC…
TtPIP1;2	ATGGAGGGTAAGGAAGAGGATGTTAGACTAGGAGCCAACAAGTTCTCAGAGAGGCAACCACTGGGTACAGTGGCTCAGGACAGAGACTACAGAGAGCCACCGGCTGCACCGTTCTTTGAGGCCGGTGAGCTGACTTCATGGTCCTTTTACCGTGCTGGAATTGCTGAGTTCATAGCCACCTTTTTGTTCCTCTACATCTCAATTTTGACTGTTATGGGAGTTAACAGGTCACCTACAAAGTGTGGTACTGTTGGTATTCAGGGTATTGCTTGGGCTTTTGGTGGCATGATCTTTGCCCTTGTTTACTGTACTGCTGGAATTTCAGGAGGTCACATTAACCCAGCAGTGACATTTGGGCTATTCTTGGCAAGGAAGTTGTCCTTGACAAGGGCAGTGTTC…
TtPIP1;3	ATGGAGGGGAAAGAAGAGGATGTGAAGTTGGGAGCTAACAAGTACTCAGAGAGACAACCATTGGGAACATCAGCACAGTCAAAGGACTACAAAGAGCCACCACCAGCACCCTTTTTTGAGCCTGGGGAGCTAACTTCATGGTCATTTTATAGGGCTGGAATTGCTGAGTTTATTGCCACTTTCTTGTTCCTTTACATTACTGTTTTGACTGTCATGGGTGTTAACCGCTCTCCTAGCAAGTGTGCCTCTGTTGGTATTCAGGGTATTGCTTGGGCTTTTGGTGGGATGATTTTTGCTCTTGTTTACTGTACTGCTGGTATCTCAGGTGGACACATTAACCCAGCTGTGACCTTTGGTCTGCTATTGGCAAGGAAACTGTCCTTAACAAGGGCAGTGTTC…
TtPIP1;4	ATGGAGGGGAAAGAAGAGGATGTAAAGTTGGGAGCTAACAAGTACTCAGAGAGGCAGCCATTAGGAACATCAGCACAGTCAAAGGACTACAAAGAGCCACCACCAGCACCCTTTTTTGAGCCTGGGGAGTTAACTTCATGGTCATTTTACAGGGCTGGAATTGCTGAGTTTATTGCCACTTTCTTGTTCCTTTACATTACTGTTTTGACTGTCATGGGTGTTAACCGCTCTCCTAGCAAGTGTGCTTCTGTTGGTATTCAGGGTATTGCTTGGGCTTTTGGGGGCATGATTTTTGCTCTTGTTTACTGTACTGCTGGTATCTCAGGTGGACACATTAACCCAGCTGTGACCTTTGGTCTGCTATTGGCAAGGAAACTGTCCTTAACAAGGGCAGTGTTC…
TtPIP2;1	ATGGGAAAGGATTTTGAGGCAGGAGAGGCAAGAGACATATCAAAGGACTACCAAGACCCACCACCATCACCTCTTTTCGACACCGAAGAGCTGACAAAATGGTCGTTCTATAGGGCTGTGATTGCTGAGTTTGTTGCAACTTTGTTGTTTTTGTACATCACTGTGTTGACTGTGATTGGGTACAAGAGTCAGTCTGATCCTATCAATGGACCTGATGCTGGTTGTGGTGGTGTTGGTATCCTTGGAATTGCTTGGGCTTTTGGTGGCATGATTTTCATCCTTGTTTACTGCACCGCTGGTATCTCTGGTGGACACATAAACCCAGCAGTGACATTCGGGTTGTTCTTGGCCCGAAAACTATCACTTACGCGGGCCTTACTGTACATGATAGCCCAATGC…
TtPIP2;2	ATGGGGAAGGATTTTGAGGCAGGAGGAGAGGCAAGAGACATAACAAAGGACTACCAAGACCCACCACCATCACCTCTTTTCGACACCGAAGAGCTGACAAAATGGTCGTTCTATAGGGCTGTGATTGCTGAGTTTGTTGCAACTTTGTTGTTTTTGTACATCACTGTTTTGACTGTCATTGGGTACAAGAGCCAGTCTGATCCTATCAATGGACCTGATGCTGGTTGTGGTGGTGTTGGTATCCTTGGGATTGCTTGGGCTTTTGGTGGCATGATTTTCATCCTTGTTTACTGCACCGCCGGTATTTCTGGTGGACACATAAACCCAGCAGTGACATTTGGGTTGTTCTTGGCCCGAAAGCTATCACTTATGCGGGCCATATTGTACATGATAGCCCAA…
TtPIP2;3	ATGACAAAGGACATGGGAGCACCAACAGAGCAAGGCTCATTCTCAGCAAAAGACTACCATGACCCTCCCCCAGCACCTTTAATAGACCCAGGGGAGTTCGGCAAATGGTCATTTTACAGGGCTATCATTGCTGAGTTTGTAGCCACTTTGCTGTTTCTTTACATCACTGTTCTCACTGTGATTGGTTACAAGAGCCAAACTGACCCTGCTATGAACGCTGATGAGTGTGGTGGTGTTGGTATTTTGGGTATTGCTTGGGCCTTTGGTGGCATGATTTTCATCCTTGTTTATTGCACTGCCGGAATTTCTGGTGGGCACATAAACCCAGCAGTCACATTTGGGCTATTTCTGGCTCGAAAGGTCTCACTGATCCGAGCCATAATGTACATGGTGGCCCAA…
TtPIP2;4	ATGACAAAGGACATGGGAGGAGCACCAACAGAGCAAGGCTCATTCTCAGCAAAAGACTACCATGACCCTCCCCCAGCACCTTTGATAGACCCAGGGGAGTTGGGCAAATGGTCATTTTACAGGGCTGTCATTGCTGAGTTTGTAGCCACTTTGTTGTTTCTTTACATCACTGTTCTCACTGTGATTGGTTACAAGAGCCAAACTGACCCTGCTAAGAACGCTGATCAGTGTGGTGGTGTTGGTATTTTGGGTATTGCTTGGGCCTTTGGTGGCATGATTTTCATCCTTGTTTATTGCACTGCCGGAATTTCTGGTGGGCACATAAACCCAGCGGTCACATTTGGGCTATTTCTGGCTCGAAAGGTCTCACTGATCCGAGCCATAATGTACATGGTGGCT…
TtPIP2;5	ATGACCAAGGACGTGGAGGTAGCTGATCAGCAAGCTCCTGAGTTCTCAGCAAAAGACTACCATGACCCTCCACCAGCCCCTTTGATTGACATGGATGAGCTGAAAAAATGGTCATTTTACAGGGCTGTTATAGCTGAGTTTGTAGCAACTCTACTTTTCCTCTATATTACTGTCTTAACGGTTATTGGGTATAAGAGCCAGACTGATCCCGCCACCAACGCAGACCAGTGTGGTGGCGTTGGTATCCTCGGTATCGCTTGGGCCTTTGGTGGCATGATCTTCATCCTTGTTTACTGCACCGCCGGTATCTCCGGAGGGCACATCAACCCAGCTGTGACCTTTGGGTTGTTTTTGGCAAGGAAAGTGTCACTAATTAGAGCAGTATTGTACATGGTAGCA…
TtPIP2;6	ATGACTAAGGACGTGGAGGTAGCTGATCAGCAAGCTCCTGAGTTCTCAGCAAAAGACTATCATGACCCTCCACCAGCCCCTTTGATTGACATGGATGAGCTGAAAAAATGGTCATTTTATAGGGCTGTCATAGCTGAGTTTGTAGCTACTCTACTTTTCCTCTATATTACTGTCTTAACGGTGATTGGATACAAGAGTCAGACCGATCCCGCCACCAACGCCGACCAGTGTGGTGGCGTTGGCATCCTCGGTATCGCTTGGGCCTTTGGTGGCATGATCTTCATCCTTGTTTACTGCACCGCTGGTATCTCCGGAGGGCACATCAACCCAGCTGTGACCTTTGGGTTGTTTTTGGCAAGGAAAGTGTCACTAATTAGAGCAGTATTGTACATGGTAGCA…
TtPIP2;7	ATGTCAAAGGAAGTGAGTGAGGAGGGACAAGGGCTTGGACACCAGCATGGCAAGGACTACGTTGATCCACCACCAGCACCTTTGTTTGACATGGGTGAGCTCAAGCTCTGGTCTTTCTACAGGGCCTTAATTGCTGAGTTCGTAGCTACTCTTTTGTTCCTCTATGTCACTGTTGCTACTGTCATTGGCCACAAGAAACAAACTGGCCCTTGTGATGGTGTTGGTCTTCTTGGTATTGCTTGGGCTTTTGGTGGCATGATTTTCATCCTTGTTTACTGCACCGCCGGTATCTCTGGAGGACACATCAACCCAGCAGTGACATTCGGACTGTTCCTAGCTAGGAAAGTGTCCCTAATAAGGGCAGTGGCCTACATGATAGCTCAGTCCTTGGGAGCCATC…
TtPIP2;8	ATGTCAAAGGAAGTGAGTGAGGAGGGACAAGGGCTGGGACACCAGCATGGCAAGGACTACGTTGATCCACCACCAGCACCATTGTTTGACATGGGTGAGCTCAAGCTCTGGTCTTTCTACAGGGCCTTAATTGCTGAGTTCGTAGCTACTCTTTTGTTCCTCTATGTCACTGTTGCTACTGTCATTGGCCACAAGAAACAAACTGGCCCTTGTGATGGTGTTGGTCTTCTTGGTATTGCTTGGGCTTTTGGTGGCATGATTTTCATCCTTGTTTACTGCACCGCCGGTATCTCTGGAGGACACATCAACCCAGCAGTGACATTCGGACTGTTCCTAGCTAGGAAAGTGTCCCTAATAAGGGCAGTGTCCTACATGATAGCTCAGTCCTTGGGAGCCATC…
TtPIP2;9	ATGGGAGATCAGGAGGACATGGAGGAGTATGTAGCACCAGGACAGCTACCGAAGAACTACCACGACCCACCGCCGTCGCCGTTTTTCAACATTGAGGAGCTGACAAAGTGGTCGTTTTATAGGGCATTGATAGCTGAGTTCGTTGCTACTATGTTGTTCTTGTACATCGCTGTCTTGACTGTCATTGGCTACAAGAGCCAGTCCGACACCACCGTCGTCGCCAACGGACCCAATGCTGGGTGTGGTGGCGTAGGCATCCTTGGGATTGCTTGGTCATTTGGTGGCATGATCTTTGTTCTTGTTTACTGCACTGCTGGTATCTCTGGTGGGCACATAAACCCAGCAGTGACATTTGGGTTGTTCTTGGCTCGAAAGCTATCGGTTATACGAGCCATATTG…
TtPIP2;10	ATGGGAGATCAGGAGGACATGGAGGAGGAGTACGTAGCACCAGGACAGCTACCGAAGAACTACCACGACCCACCGCCGTCGCCGTTTTTCAACCTTGAGGAGCTGGCAAAGTGGTCGTTTTATAGGGCATTGATAGCTGAGTATCCTTGGGATTGCTTGGTCCTTTGGTGGCATGATCTTTGTTCTTGTTTACTGCACGGCTGGTATCTCAGGTGGGACATAAACCCAGCAGTGACATTTGGGTTGTTTTTGGCTCGAAAGGTATCGGTTATACGAGCCATATTGTACATGTTAGCCCAATGCTTGGGTGCAATCTGCGGTGTTGGGTTAGTGAAGGCCTTCCAAAAGGCGCACTATCAGAAGTACGGTGGTGGAGCCAACGAGCTAGCCACTGGCTAC…
TtPIP2;11	ATGGCAAAGTTGAAGATCAAGCAGGGTGCGGTGAAGGTGTTGGAGCCATGGATTGAGGCTTTGCCAGACCGTATCGTTGTTTATTACCCACTCAAATCTTCTTTCAAAACTCCAAAGCTCGAAACAATTGAGGAGGAGAGGGATGAACAACGAGATGACGAACGTCATGCATGTAACTACAGGCAATACATTTCGTCGAGATGTCCGAGCAACGTGCTCCTGAGTTCTCAGCAAAAGACTACCATGACCCTCCACCAGCTAGCTGCATTGATTGACATGGATGAGCTCAAAAAATGGTCATTTTACAGGGCTGTCATAGCTGAGTTTGTAGCAACTCTGCTTTTCCTCTATATTACTGTCTTAACGGTTATTGGTTATAAGAGCCAGACTGATCCTGCC…
TtTIP1;1	ATGCCTATCAGAGAGATTAGTGTTGGAAGGCCTGAAGAGGCATACCACCCAAACACCCTAAAGCAGGGTTTAGCTGAGTTTATCTCAACTGTTATCTTTGTCTTCGCCGGCGAGGGTTCCGGCATGGCTTTCGCTAAGTTAACCGAAGGCGCTGCCGGAACCCCCGCCGGCCTTGTAGCCGCTGCTATTGCACATGCTTTTGCGCTTTTCGTAGCGGTTTCCGTTGCCGCTAATGTCTCTGGTGGACATGTTAACCCTGCTGTCACTTTTGGTGCCTTTGTTGGTGGTAACATTTCTCTCCTACGTGGGATTGTTTACTGGATTGCTCAGTGTGCTGGTTCCACTGTTGCTTGCTTGTTGCTTAAGTTCGCCACTGGTGGCTTGGAAACCTCTGCCTTC…
TtTIP1;2	ATGCCTATCAGAGAGATTAGTGTTGGAAGGCCTGAAGAGGCATACCACCCAAACACCCTAAAACAGGGTTTGGCTGAGTTTATCTCAACTGCTATCTTTGTCTTTGCCGGCGAGGGTTCCGGCATGGCGTTCGCTAAGTTAACCGAAGGCGCTGCTGGAACCCCCGCCGGCCTTGTAGCCGCTGCTATTGCACATGCCTTTGCGCTTTTCGTAGCGGTTTCCGTTGCCGCTAATGTCTCTGGTGGACATGTTAACCCTGCTGTCACTTTTGGTGCCTTTGTTGGTGGTAACATTTCTCTCATACGTGGGATTGTTTACTGGATTGCTCAGTGTGCTGGTTCCACTGTTGCTTGCTTGTTGCTTAAGTTCGCCACTGGTGGCATGGAAACCTCTGCCTTC…
TtTIP1;3	ATGGCGATCCCAAGACTCGCTCTCGGGTCTCCAGCTGAGGCTAGCCACCCCGGTGCCCTCAAAGCTGCATTGGCTGAGTTCATTTCCATGCTCATTTTTGTCTTTGCTGGAGAAGGCTCTGGCATGGCATTCAGTAAGCTTACAGACAATGGCTCGGCCACTCCAGCAGGGCTGGTAGCTGCTGCATTGTCCCATGGATTCGCACTTTTTGTAGCTGTCTCAGTGGGCGCTAACATCTCCGGTGGACATGTGAACCCTGCTGTCACCTTTGGTGCCTTCCTTGGGGGAAAGATCTCCTTCATAAGGACCATACTCTACTGGATTGCTCAGTGCCTTGGTGCTGTGGTTGCTTGCCTCCTCCTCAGCTTCTCCACTGGAGGACTGCCAACGTCTGCATTT…
TtTIP1;4	ATGGCGATCCCAAGACTCGCTCTCGGGTCTCCAGCTGAGGCTAGCCACCCCGGTGCCCTCAAAGCTGGATTGGCTGAGTTCATCTCCATGCTCATCTTTGTCTTTGCTGGGGAAGGCTCTGGCATGGCATTCAGCAAGCTTACAGATAATGGCTCGGCAACTCCAGCTGGGCTGGTAGCCGCTGCATTGTCCCATGGATTCGCACTTTTTGTAGCTGTCTCAGTGGGTGCTAACATCTCCGGTGGACACGTGAACCCTGCTGTTACCTTTGGTGCCTTCCTTGGGGGTAAGATCTCCTTGATAAGGACCATACTCTACTGGATTGCTCAGTGCCTTGGTGCTGTGGTTGCTTGCCTCCTCCTCAGCTTCTCCACTGGAGGACTGCCAACATCTGCTTTT…
TtTIP1;5	ATGAATTTGGGGATTGCAGGCAAACTGACAGACAATGGTGCAGCAACACCAACAGGGCTAATAGCAGCAGCATTGACCCATGCATTTGCACTAATTGTGGCAGTTTCAGTTGGTGCCAACATTTCAGGGGGTCATGTTAACCCTGCTGTTACCTTTGGTGCCTTTGTGGGAGGTCACATTACCTTGTTGCGTGCCATCTTGTATTGGATTGGTCAATTGTTTGGATCCGTTGTTGCTTGCTTGCTTCTCAAATTCGCTACCGGAATGGAAACATCAGCATTTGCATTATCTGCCGGGGTAACCTCATGGAATGCAGTTGTATTCGAGATTGTGATGACATTTGGGCTTGTCTACACAGTTTATGCCACAGCTGTAGACCCAAAGAAAGGCACCATAGGC…
TtTIP1;6	ATGCCAATATATAGAATAGCAGTGGGTAATCCAGGGGAGGCAAGCCATCCAGATGCCTTGAGAGCGGCGCTCGCGGAGTTCTTCTCCATGATCATCTTCGTCTTCGCCGGACAAGGATCCGGCATGGCCTTTAGCAAACTGACAGACAATGGTGCAGCAACACCAACAGGGCTAATAGCAGCAGCATTGGCCCATGCATTTGCACTAATTGTGGCAGTTTCAGTTGGCGCTAACATTTCAGGGGGTCATGTTAACCCTGCTGTTACCTTTGGTGCCTTTGTTGGAGGTCACATTACCTTGTTGCGAGCCATCTTGTATTGGATTGGCCAACTCTTTGGATCTGTTGTTGCTTGCTTGCTTCTCAAATTCGCTACCGGAATGAAGGAAACATCAGCATTT…
TtTIP2;1	ATGGCAGGACTTGCCTTTGGGAGATTTGATGACTCTTTCAGTTGGGCCTCAATTAAGGCTTACATAGCTGAATTCATCTCTACATTGCTCTTTGTCTTTGCTGGTGTAGGCTCTTGCATTGCTTTCAGCAAGTTGACAGCTGATGCAGCCCTTAGCCCATCTGGGTTGGTAGCAGTTGCTGTATGCCATGCATTTGCCCTGTTTGTGGCAGTCTCAGTGGGTGCTAACATCTCCGGTGGCCATGTCAACCCTGCCGTTACCTTCGGATTGGCTCTCGGCGGCCAGATCACCATCCTTACCGGCGTTTTCTACTGGATTGCCCAGCTTGCTGGCTCTACTGTTGCATGTTTCCTCCTTAAGGCTGCCTCTGGTGGCATGACAACACCAATCCACAGTGTG…
TtTIP2;2	ATGGCAGGGCTTGCCTTTGGGAGATTTGATGACTCTTTCAGTTGGGCCTCAATTAAGGCTTACATTGCTGAATTCATCTCCACATTGCTCTTTGTCTTTGCTGGTGTTGGCTCTTGCATTGCTTTCAGCAAGTTGACAGCTGATGCAGCCCTTAGCCCATCTGGGTTGGTAGCAGTTGCTGTATGTCACGCATTTGCCCTGTTTGTTGCAGTTTCAGTGGGTGCTAACAACTCCGGTGGCCATGTCAACCCCGCCGTCACCTTTGGGTTGGCTCTCGGTGGCCAGATCACCATCCTTACCGGCATTTTCTATTGGATTGCCCAGCTTGCTGGCTCTACTGTTGCATGTTTCCTCCTTAAGGCTGCCTCTGGTGGCTTGACAACACCAATCCACAGTCCT…
TtTIP2;3	ATGGTGAAGTTGACTTTTGGTAGCTTTGGGGACTCTTTCAGTGTTGCATCACTCAAGGCTTATTTGTCTGAATTCATTGCAACTCTCCTCTTTGTGTTTGCAGGAGTAGGTTCTGCAATAGCTTTCAGCAAATTGACAAGTGATGGAGCATTGGACCCAGCAGGGCTAGTTGCAGTAGCTGTGGCTCATGCATTCGCATTATTTGTTGGGGTTTCCATAGCAGCTAACATTTCAGGTGGACACTTGAACCCAGCTGTCACCTTTGGATTGGCCATTGGAGGCAACATTACCCTCCTCACTGGACTCTTCTACTGGGTTGCCCAAGTCCTTGGCTCCGTTGTTGCTTGCCTCCTCCTCAAATTTGTCACCAATGGCAAGAGCATCCCAGCTCATGGAGTT…
TtTIP2;4	ATGGTGAAGTTGACTTTTGGTAGTTTTGGTGACTCTTTCAGTGTTGGATCACTCAAGGCTTATTTGTCTGAATTCATTGCAACTCTCCTCTTTGTATTTGCAGGAGTAGGTTCTGCAATTGCTTTCAGCAAATTGACAAGTGATGGAGCATTGGACCCAGCAGGGCTAGTTGCGGTAGCCGTGGCTCATGCATTCGCATTGTTTGTTGGAGTTTCAATAGCAGCTAACATTTCAGGTGGACACTTGAACCCAGCTGTCACCTTTGGATTGGCCATTGGTGGCAACATCACCCTCCTCACTGGACTCTTCTATTGGGTTGCACAAGTCCTCGGCTCCGTTGTTGCTTGCCTCCTCCTCAAATTTGTAACCAATGGAATGAGCATCCCAGCTCATGGAGTT…
TtTIP2;5	ATGGTGAAGTTGGATTTTGGTAGCATTGGTGACTCTTTTAGCGTTAGTTCACTCAAGGCTTACTTAGCTGAATTTATTGCCACCCTCCTTTTTGTATTTGCAGGAGTGGGTTCTGCAATTGCTTTCAGCAAGCTCACGAGTGATGGAGCACTAGACCCAGCAGGGCTAGTTGCAGTGGCTCTAGCTCATGCATTTGCATTGTTTGTTGGAGTGTCCATAGCAGCCAACATTTCAGGTGGACATTTGAACCCAGCTGTTACCTTTGGATTGGCCATTGGAGGCAACATTACTATCCTCACTGGCCTTTTCTATTGGGTTGCCCAAGTCCTTGGCTCCGTTGTTGCTTGCCTCCTCCTCAAATATGTAACCAATGGAATGAGCATCCCAGCCCATGGAGTT…
TtTIP2;6	ATGGTGAAGTTGTGTTTTGGTAGCATTGGTGACTCTTTTAGCGTTAGTTCACTCAAGGCCTACTTAGCTGAATTTATTGCCACTCTCCTTTTTGTTTTTGCAGGAGTGGGTTCTGCAATAGCTTTCAGCAAGGTAACAAGTGATGGAGCACTAGACCCGGCAGGGCTAGTTGCAGTGGCTCTAGCTCATGCATTTGCATTGTTTGTTGGGGTGTCCATAGCAGCCAACATTTCAGGTGGACATTTGAACCCAGCTGTTACCTTTGGATTGGCCATTGGAGGCAACATTTCTATCCTCACTGGCCTTTTCTATTGGGTTGCCCAAGTCCTTGGCTCCGTTGTTGCTTGCCTCCTCCTCAAATATGTAACCAATGGAATGAGCATCCCAGCCCATGGAGTT…
TtTIP3;1	ATGGCACCGCCTCGTAGATACGCGTTCGGAAGGCCGGAAGAGGCCACACACCCAGACTCCATTAGAGCCACTTTGGCTGAATTCATCTCAACTTTTATTTTCGTCTTTGCTGGCGAAGGCTCTCTCCTCGCTCTTCGGAAGCTATATGGTGCAGATGCACCAACGGGGGCGTCCTCGTTAATGGTGATAGCACTAGCTCATGCATTTGGGTTATTTGCAGCTGTTGCTTCGAGCCTAAATGTATCAGGAGGACATGTGAATCCAGCTGTTACTTTTGGTGCTCTTGTTGGAGGAAGGGTCTCATTTCTTCGTGCAATCTTATATTGGATTGCACAACTCTTGGGTGCTGTTGTAGCCGCCCTATTGTTGAGGCTTGCCACTGATGGCATGAGACCTGTT…
TtTIP3;2	ATGGCACCGCCTCGTAGATACGCGTTCGGAAGGCCGGAAGAGGCCACACACCCAGACTCCATTAGAGCCACCTTGGCTGAATTCATCTCAACTTTTATTTTCGTCTTCGCTGGCGAAGGCTCTCTCCTCGCTCTTCGGAAGCTATATGGTGCAGATGCACCAACGGGGGCGTCCTCGTTAATGGTGATAGCACTAGCTCATGCATTTGGGCTATTTGCAGCTGTTGCTTCGAGCTTAAATGTATCAGGAGGACATGTGAATCCAGCTGTTACTTTTGGTGCTCTTGTTGGAGGAAGGGTCTCATTTCTTCGTGCAATCTTATATTGGATTGCACAACTCTTGGGTGCCGTTGTAGCCGCCCTATTGTTGAGGCTTGCCACTGATGGCATGAGACCTGTT…
TtTIP4;1	ATGGCGAAGATAGCGCTAGGAACAAGCCGTGAGGCAATGCAACCAGATTGCATCAAAGCCCTGGCTGTTGAATTCATTTGCACTTTCCTTTTCGTATTCGCCGGTGTCGGATCTGCCATGGCCGCCGATAAGGTGGGAGCAGATCCGCTTGTCGGACTGTTATTTGTGGGGACAACACACGCATTTGCAGCAGCGGTGATGATAGCAGCCGGGTTCAACATATCAGGGGGGCACCTGAACCCAGCGGTGACGGTTGGGCTAGCAGCTGGTGGTCATATCACCGTGTTCAGATCTATTCTCTATATCATTGACCAATGCGCTGCTTCTGCTGCTGCTTGTTTCCTCCTCAAATATTCCACTGGAGGATTGGTATTTATTTCTTTGATTATTGATTCAATG…
TtTIP4;2	ATGGCGAAAATAGCGTTAGGAACAAGCCGTGAGGCAATGCAAGTAGATTGCATCAAAGCCCTGGTTGTTGAATTCATTTGCACTTTCCTTTTCGTCTTCGCCGGTGTCGGATCTGCCATGGCCGCCGCTTGTCGAACAGATAAGGCGGGAGCGGATCCCCTTGTCGGACTATTATTTGTCGGGACAACACATGCATTTGCGGCAGCGGTGATGATAGCAGCCGGGTTCAACATATCAGGGGGGCACCTGAACCCAGCGGTGACAATTGGGCTAGCAGCTGGTGGTCATATCACCGTGTTCAGATCTATTCTCTATATTATTGACCAATGCGCTGCTTCTGCTGCTGCTTGTTTCCTCCTCAAATATTCCACTGGTGGATTGACAACCCCCATACACGCA…
TtTIP5;1	ATGGCACCAAGAACAACATTTAGCGCCCATTTCAAGCAATCAGTAACCCCAAATTCTCTGAGATCATACCTTGCTGAATTTATCTCCACCTTCATCTATGTCTTGGCTGCCGCCGGATCCGTCATGGCATCAAGGAAACTGATGCCGGATGCAAGATCTGACCCTGCTAGCCTAGTGGTGGTTGCCATGGCGAATGCATTTGGCCTTACCTCGGCCGTCTACATTTCCGCTAGCGTTTCCGGTGGCCATGTCAACCCGGCCGTCACATTCGGCAAGGTGGTGGGATGTCACATTCCTATTCCTACTGCTCTATTCTACTGGATTTCCCAGATTCTTGGATCTGTTATGGCTTGCCTCCTCCTCAAAGTCACCACTGTTGATCAAAATGTTGTGACCCAT…
TtTIP5;2	ATGCAAGATCTGACCCTGCTAGCCTACTGGTGGTTGCCATGGCAAATGCATTTGGCCTTACCTCCGCCGTCTATATTTTCCGCTAGCGTTTCCGTTGGCCATGTCAACCCGGCTGTCACATTTGGCAAGGTGGTGGGATGTCACATTCCCATTCCTACCGCCCTATTCTACTGGATTTCACAAATTCTTGGATCCGTTATGGCTTGCCTCCTCCTCAAACTCACCACGGTTGATCAAAATGTTGTGAGCCATGCAATTGCGGGGCAAATGACCGGGTTTGGAGCATCCATGTTGGAAGGTGCGCTCACCTTTGGATTAGTCTACACTGTCTATGCTGCTTCGGATCCAAGACACGGGCAATTGGGCTCCATGGGTCCAATAGCAATCGGGCTAATAACA…
TtNIP1;1	ATGGGTGAAATTGCAAGAGCTAATGGCAACCATGAAGTCACCTTGAATGTCAAGGATGGTGCTGAAACTCTCCCTCAAAACACTACTACCAATAATTCCTCTGCTTCTAACTTCAATGACAACCGCTCTGGTTCTAGCTGCATCAGTATCCCCTTTCTGCAAAAGATGATTGCGGAGGCACTAGGGACATACTTTGTGATATTTGCGGGGTGTGCGGCGGTGATAGTGAACAAGGATGAAGAGAAAGTGGTGACTTTACCAGGAATTTCAATAGTTTGGGGTGGTGTTGTTATGGTCATGGTTTACTCTGTAGGCCACATTTCAGGTGCTCATTTTAATCCTGCTGTCACTATTGCTTTTGCTACTTGCCGGAGATTTCCATGGAAGCAGGTTGTACCA…
TtNIP1;2	ATGGGTGAAATTGCAAGAGCTAATGGCAACCATGAAGTCACCTTGAATGTCAAAGATGGAGCTGAAACTCTCCCTCAAAACCATGCTACCAGTAATTCTTCTGCTTCTAACTTCAATGACAACCGCTCTGCTGGTTCTAGCTGCATCAGTATCCCCTTTCTGCAAAAGATGATTGCGGAGGCACTAGGGACATACTTTGTGATATTTGCGGGGTGTGCGGCGGTGATAGTGAACAAGGATGAGCAGAAAGTGGTGACTTTACCAGGAATTTCAATAGTTTGGGGTGGTGTGGTTATGGTCATGGTTTACTCTGTAGGCCATATTTCAGGTGCTCATTTTAATCCTGCTGTCACTATTGCTTTCGCTACTTGCCGGAGATTTCCATGGAAACAGGTACCA…
TtNIP2;1	ATGACACCGCCAACAAAGATCAATCATGTTGATGATGACCAGAGCCTGCGAAAACTTGAAGAAGGATGCGTCACCATATTGCGACAACCTCTGAAAACTTCTCTTGACCCATCTTCTTGTTCATCAACTGCTACACTAGTCATTTTGCAAAAGCTGTTAGCAGAGGTGATTGGTACATATTTCATAGTGTTCACTGGGTGTGCCGCGATAGTGATAGAGAAAACAAATGGTTCAGTGACATATCCAGGCATTTGTGTTACTTGGGGCTTGATCATTATGATTGTGGTTTACACCTTCGAGCACATTTCTTGCCATTTTAACCCCGCTGTCACTATCACTTATACCCTCCTTAGAGGCTTCCCTTTCAAGCAGGTTCCACTTTATATAAGTGCTCAAATA…
TtNIP2;2	ATGACACCGCCAACAAAGATCAATCATGTTGATGATGACCAGAGCCTGCGAAAACTTGAAGAAGGATGCGTCACCATATTGCGACAACCTCTGAAAACTTCTCTTGACCCATCTTCTTGTTCATCAACTGCTACACTAGTCATTTTGCAAAAGCTGTTAGCAGAGGTGATTGGTACATATTTCATAGTGTTCACTGGGTGTGCCGCGATAGTGATAGAGAAAACAAATGGTTCAGTGACATATCCAGGCATTTGTGTTACTTGGGGCTTGATCATTATGATTGTGGTTTACACCTTCGAGCACATTTCTTGCCATTTTAACCCCGCTGTCACTATCACTTATACCCTCCTTAGAGGCTTCCCTTTCAAGCAGGTTCCACTTTATATAAGTGCTCAAATA…
TtNIP2;3	ATGACACCGCCAACAAAGATCAATCATGTTGATGATGACCAGAGCCTGCGAAAACTTGAAGAAGGATGCGTCACCATATTGCGACAACCTCTGAAAACTTCTCTTGACCCATCTTCTTGTTCATCAACTGCTACACTAGTCATTTTGCAAAAGCTGTTAGCAGAGGTGATTGGTACATATTTCATAGTGTTCACTGGGTGTGCCGCGATAGTGATAGAGAAAACAAATGGTTCAGTGACATATCCAGGCATTTGTGTTACTTGGGGCTTGATCATTATGATTGTGGTTTACACCTTCGAGCACATTTCTTGCCATTTTAACCCCGCTGTCACTATCACTTATACCCTCCTTAGAGGCTTCCCTTTCAAGCAGGTTCCACTTTATATAAGTGCTCAAATA…
TtNIP3;1	ATGGATACAAACTCACAAATTGCTCCATCTTCAAAGAAAGGACAAAATATATATCATGTCCTCATGACATCCTTTAATCAACATTACCCACCAGAATTTATTCGTCAGGTGGTAGCGGAGATCATAGCAACATATCTGCTAGTGTTTGTAACGTGCGGGGCTGCAGCCATTAGCGCGACGGACGAACGGAGAATAGCGAGGCTGGGTGCCTCTCTTGTTGGAGGGATGATTGTCACGGTGATGATATACGCTGTTGGTCACATTTCTGGTGCTCATATGAACCCGGCTGTCACTTTGGCGTTTGCTGCAGTGAGGCATTTCCCTTGGAAGCAGGTTCCACTTTACGCAGCCGCTCAACTGGCAGGAGCAATATCAGCTGCATTTACGTTGAGAGTATTG…
TtNIP4;1	ATGGTTGCTCAATTAATGGGATCTATTCTAGCTAGTGGAACTTTAGCCCTCATGTTTGATGTTACTCCTAAAGCCTTCTTTGGCACTGTTCCTGCTGGGTCTAATGGCCAATCCTTGGCCATAGAAATCATCATCTTTTTTCTGTTGATGTTCGTCATTTCTGGAGTTGCCACTGACACTCGAGCAATTGGAGAGTTGGCTGGACTCGCTGTTGGAATGACCATAATGCTAAACGTGTTTGTGGCCGGGCCGATTTCTGGAGCATCAATGAACCCAGCTAGAAGCCTTGGGCCTGCACTTGTTAAGCACAACTTCAAAGGAATTTTGGTGTATATTATAGGCCCACCAATTGGGACCATTACAGGTGCATTTGCTTACAATCTCATAAGGTTCACTGAC…
TtNIP4;2	ATGGGTACAAATACAAATACTGATGACATTCTTCAAGAAGAAGATTTGAAAAAGGTTGAAGAAGGCAATGGCAATGGCATTGGCACCTCATCAAAATTTGATTCCTTTTGTTCTTCTCCATCTGTCGTCTGCTTAACACAAAAGTTGGTGGCGGAGGTGTTTGGAACATACTTCGTTATATTCGCGGGGTGTGGGTCGGTGGTGGTGAATAAGCTGTACGGCGAGACGGTTACATTCCCGGGGATTTGTGTGACATGGGGTCTAATTGTCATGGTTATGGTTTACTCTCTTGGACACATTTCTGGGGCCCACTTTAACCCTGCTGTTACTCTTACCTTTGCCATTTACCGTCATTTCCCTTACAAGGAGGTTCCATTTTACATGGTTGCTCAATTAGCG…
TtNIP5;1	ATGCCGGAATTAATGAACGGATCAGTAGGAGGAGGAGGAGAGGATCATACAGACGTGTCTGTATCGGTGCCGCCGACACCGGAAGGGACACCGGCACCGCTTTTCCGACACGGACACGTTGACTCGATGTCATACGAGCGATCGTCTATGCCGAGGTGCAAATGCTTTCCTGAGGCGCTCGGGTTCGGGTTCGGGTCGGGTCATGCTAATTCTTGTTTCACCGACTTCAAAGTTCCTGATGTCACTCTCACCCGAAAGCTTGTTGCAGAGTTTGTAGGAACATTTATCCTGATATTTGCCGCAACAGCAGCTCCAATCGTGAACCAGAAGTATGCGGGGGCAGAGACACTGATCGGCAATGCAGCATCTGCTGGACTGGCAGTGATGATAGTCATCTTG…
TtNIP5;2	ATGCCGGAATTGATGAACGGAGCAGGAGGAGGAGGAGAGGATCATCCAGACGTGTCCGTATCGGTGCCGCCGACACCGGAAGGGACACCGGCGCCGCTGTTCCGACACGGACACGTTGACTCGATGTCATACGAGCGATCGTCTATGCCGAGATGCAAATGCTTTCCTGAGGCGCTCGGGTTCGGGCCGGGTCATGCTAATTCTTGTTTCACCGACTTCAAAGTTCCTGATGTCACTCTCACCCGAAAGCTTGTTGCAGAGTTTGTAGGAACATTTATCCTGATATTTGCAGCAACAGCAGCTCCAATCGTGAACCAGAAGTATGCGGGCTCAGAAACACTGATAGGCAATGCAGCGTCTGCTGGACTGGCAGTGATGATAGTCATCTTGTCCACAGGC…
TtNIP6;1	ATGCAAAATATGGATGCTGAGGATACTGCTTCGATGCCTTCAACTCCAGTGACCCCCGGCACCCCTGGGGCTCCCCTCTTTGGGGGATTCAGGGGAGATAGACCCACGACAACCCCTAGGAAGTCCCTTCTCGGTAACTGCTTCACTGTCGAAACCTGGCCTAATGAAGAAGGGAGCTTGCCAGCCGTGACCTGCACTATGATGATGCCACCTCCCCCCGTCCCTGTTGCTAAGAAGGTTGTGGCAGAGTTCATAGGCACCCTTATACTCATATTTGCTGGGACAGCCACAGCTATTGTGAACCAGAAGACACCAGGCTCAGAAACGCTTATCGGATGTGCAGCCTCCTCGGGCCTCGCAGTAATGATAATCATCCTTGCAACAGGCCACATCTCTGGT…
TtNIP6;2	ATGGATGCTGAGGATACAGCTTCAATGCCTTCAACCCCAGTGACCCCAGGCACCCCTGGGGCTCCCCTCTTTGGGGGATTCAGGGGAGATAGACCCACGACAACCCCTAGGAAGTCCATTCTCGGTAACTGCTTCACTGTCGAAACCTGGCCTAATGAAGAAGGGAGCTTGCCTGCTGTGACCTGCACCATGATGATGCCACCTCCCCCCGTCCCTGTTGCTAAGAAGGTGGTGGCAGAGTTCATAGGCACCCTTATACTCATATTTGCCGGGACAGCCACAGCTATTGTGAACCAGAAGACACCAGGCTCAGAAACGCTTATCGGATGTGCAGCCTCCTCGGGCCTCGCAGTAATGATAATCATCCTTGCAACAGGCCACATCTCTGGTGCCCATCTC…
TtNIP7;1	ATGGCGGGCAATTGTGATGAGATGTCACCGTCGACAGAAACACCAGCTACCGGCAATCGGTCGTTGACTAAACTATCTGCGTCGTCTAGGATGCTCAGCGTTACACTTCTTAAAAAGGCTGGTGCAGAATTTATAGGGACGTTCATATTAGTATTCGCAGCAGCAGCAGGCCCAATTGTGGACCAAAAGTACAACGGTGTTGAAACCTTGATTGGCAACGCAGCATGTTCAGGCTTGGTGGTGATGATACTGGTCCTATCAATAGGCCACATTTCTAAAGCCCATCTTAACCCAGCTGTAACCATTGCATATGCAAGTCTAAGACATTTCCCTTGGGCCCAAGTACCCATCTTCATTGTGGCTGAACTACTTGGATCCATATCCGCCTCGTTCTTGCTT…
TtNIP7;2	ATGGCGGGCAATTGTGATGAGATGTCACCGTCGACAGAAACACCAGCTACCGGCAATCGGTCGTTGACTAAACTATCTGCGTCGTCTAGGATGCTCAGCGTTACACTTCTTAAAAAGGCTGGTGCAGAATTTATAGGGACGTTCATATTAGTATTCGCAGCAGCAGCAGGCCCAATTGTGGACCAAAAGTACAACGGTGTTGAAACCTTGATTGGCAACGCAGCATGTTCAGGCTTGGTGGTGATGATACTGGTCCTATCAATAGGCCACATTTCTAAAGCCCATCTTAACCCAGCTGTAACCATTGCATATGCAAGTCTAAGACATTTCCCTTGGGCCCAAGTACCCATCTTCATTGTGGCTGAACTACTTGGATCCATATCCGCCTCGTTCTTGCTT…
TtNIP7;3	ATGGCGGGCAATTGTGATGAGATGTCACCGGCGACAGAAACACCAGCTACCGGCAATCGGTCGTTGACTAAACTATCTGCGTCGTCTATGATGCTCAGCGTTACACTTCTTAAAAAGGCTGGTGCAGAATTTATAGGGACGTTCATATTAGTATTCGCAGCAGCAGCAGGCCCAATTGTGGATCAAAAGTACAACGGTGTTGAAACCTTGATTGGCAACGCTGCATGTTCAGGCCTGGTGGTGATGATACTAGTCTTATCAATTGGCCACATTTCTAAAGCCCATCTTAACCCGGCAGTCACCATAGCATATGCAACTCTAAGACATTTCCCTTGGTCCCAAGTACCCATCTTCATTGTGGCCGAACTACTTGGATCCATATCCGCCTCGTTCTTGCTT…
TtNIP8;1	ATGTTAGGAGAATCCTTAAGACCAAATGGGCAGTCCCAAAAAGAAGAATCAGCAAGTGGGCAATTGCAAAATAATCAACAACAGATGAGGGCTGCTCATGCTGAAAGTGTTCATGAACATGATGATATCGATCGATCATTTCCTCGAAACGAGATTCAAAAATTCGCCTTGGGATTCATTCCTAGAGGATGGTCATCATGGAATATAAATCCTGCTCGTCCTATGTTAGCAGAAATGCTAGGAACATTCATGTTGATATTCTGCATATGTGGGATACTAGGGAGTATGGAATTGGTAGGAAACCAAGTGGGTCTTATGGAGTATGCTACCACAGCTGGTGCTGCCATAATTGTGATTGTTTTCTCTCTAGGCCGGGTCTCCGGTGCTCATGTAAATCCT…
TtNIP8;2	ATGTTAGGAGAATCCTTAAGACCAAATGGGCAGTCCCAAAAAGAAAAATCAACAAGTGGGCAATTGCAAAATAATCAACAACAGATGAGGGCTGCTCATGATGAAAGTGTTCATGAACATGATGATATCGATCGATCATTTCCTCGAAACGAGATTCAAAAATTCGCCTTGGGATTCATTCCTAGAGGATGGTCATCATGGAATATAAATCCTGCTCGTCCTATGTTAGCAGAAATGCTAGGAACATTCATGTTGATATTCTGCATATGTGGGATACTAGGGAGTATGGAATTGGTAGGAAACCAAGTGGGTCTTATGGAGTATGCTACCACAGCTGGTGCTGCCATAATTGTGATTGTTTTCTCTCTAGGCCGGGTCTCCGGTGCTCATGTAAATCCT…
TtNIP8;3	ATGTTAGCAGAAATGCTAGGAACATTCATGTTGATATTCTGCATATGTGGGATATTAGGGAGTATGGAATTGGTAGGGAACCAAGTGGGTCTTATGGAGTATGCTACCACAGCTGGTGCTGCCATAATTGTGATTGTTTTCTCTCTAGGCCGGGTCTCCGGTGCTCATGTAAATCCTGCTGTCACAATAGCCTTTGCTGTATTTGGTCATTTTCCATGGTCCAAGGTACCCTTCTATGTGGGTGCACAGCTGCTAGGCTCTATATTGGCAACATACACAGGGGAGCTTGTTTATGGAGTGAAAGCAGAGCTGATGACCACCAACCCTATCCAAGGTAGAGCTTCCTCAGCCTTCTGGGCTGAATTTGTCGCAAGCTTTATCGTCATGTTCGTTGCTACA…
TtNIP8;4	ATGTTAGCAGAAATGCTAGGAACATTCATGTTGATATTCTGCATATGTGGGATATTAGGGAGTATGGAATTGGTAGGAAACCAAGTGGGTCTTATGGAGTATGCTACCACAGCTGGTGCTGCCATAATTGTGATTGTTTTCTCTCTAGGCTGGGTCTCCGGTGCTCATGTAAATCCTGCTGTCACAATAGCCTTTGCTGTATTTGGTCATTTTCCATGGTCCAAGGTACCCTTCTATGTGGGTGCACAGCTGCTAGGCTCTATATTGGCAACATACACAGGGGAGCTTGTTTATGGAGTGAAAGCAGAGCTGATGACCACCAACCCTATCCAAGGTAGAGCTTCCTCAGCCTTCTGGGCTGAATTTGTCGCAAGCTTTATCGTCATGTTCGTTGCTACA…
TtSIP1;1	ATGGCAGCAGGAACAATAGATTCAATAAAACTAGCAATAGGTGATGGAATATTAACATTCATGTGGGTATTTTGTGCTTCAACAATTGGTCTTTTCACCTACTTAATCTCAACTTGGTTTGCAATTCAAGGCCCTTTGACACTTGTTATTACAACTTCAATTGTAGCCACCCTTGTTTTTATGTTCACCTTCATTGGTCAAATCCTTGGTGGTGCTAGCTTTAACCCCACTGGCACTGCTGCCTTTTATGCCGCTGGTCTTGGCCGTGATTCTCTTCTCTCCATGGCACTCCGGTTCCCTGCTCAGGCTGCCGGTGCTGTGGGTGGTGCTATTGCTATTTCAGAAGTGATGCCGAGTCAGTACAAACACATGTTAGGGGGACCTTCAATTAAAGTGGAC…
TtSIP1;2	ATGGCAGCAGGAACAATGGATTCAATAAAACTAGCAATAGGTGATGGAATATTAACATTCATGTGGGTATTTTGCGCTTCAACAATTGGTCTTTTCACCTATTTAATCTCAACTTGGTTTGCAATTCAAGGCCCTTTGACACTTGTCATTACAACTTCAATTGTGGCCACTCTTGTTTTTATATTCACCTGCATTGGTCAAATCCTTGGTGGTGCTAGCTTTAATCCCACTGGCACTGCTGCCTTTTATGCCGCTGGTCTTGGCCGTGATTCTCTTCTCTCCATGGCCCTCCGGTTCCCTGCTCAGGCTGCCGGTGCTGTGGGTGGTGCTATTGCTATTTCAGAAGTGATGCCGAGTCAGTACAAACACATGTTAGGGGGACCTTCAATTAAAGTGGAC…
TtSIP2;1	ATGGGGGCAATTGGGTTGCTACTTTCGGATTGTATCTTATCATTTATGTGGGTGTGGTCTGGAATGTTGGTTAGGATTCTTGTCTTCAACATTCTAGGGTTTGCTCATGATTTTACTGGTGAAATGGTAAAGCTGGGTTTCTCTCTTCTCAATCTGTTCTTCTTTGCCCTTATGCTCAAATTTTCCAAAGGTGGGGCCTACAATCCTTTAACTGTTTTGGCTGGCGCTATTTCTGGGGGATTTGATCGGTTTTTGTTCACCATTGGTGCAAGAATCCCAGCACAGGTGCTTGGAGCCATTTATGGTGTTAGGCTCCTCATTCATACTTTTCCTGAAATTGGTCGGGGACCAAAGCTGAACGTCCACATCCATCATGGTGCCCTGACTGAAGGAGTACTT…
TtSIP2;2	ATGGGCGCAATTGGGTTGCTACTTTCGGATTTCATCCTATCATTTATGTGGGTATGGTCTGGAATGTTGGTTAGAATTCTTGTCTTCAACGTTCTAGGGTTTGCTCATGATTTTACGGGTGAAATGGTAAAGCTGGGTTTCTCTCTTCTTAATCTGTTCTTCTTTGCCCTTATGCTCAAATTTTCCAAAGGTGGGGCCTATAATCCGTTAACTGTTTTGGCTGGCGCCATTTCTGGGGGATTTGATCGGTTTTTGTTCACCATTGGTGCAAGAATTCCAGCACAGGTGCTTGGAGCCATTTATGGTGTTAGTCTCCTCATTCATACTTTCCCTGAAATTGGACGGGGACCAAAGCTGAACGTCCACATCCATCATGGTGCCTTGACTGAAGGGGTACTT…
TtXIP1;1	ATGGCAGAACTACTAGGCACGGCGCTCCTAGTATTTATGGTAGATATGGTTGTGATCTCCTCCTTTGAGACAAGCACCAAGACTCCAAACATTGTAATGTCTTGCTTTGTTGCCTTACTAATCACAATCCTCCTCCTTACTACAATCCCGGTCTCCGGTGGCCACATCAACCCAGTAATAACCGTCTCGACCACCCTCGTGGGCCAAATCTCCTTCTTTCGGGCCGTGGTGTACATTGTGGCCCAATGCATAGGGGCAGTCCTTGGGGCCTTGGCCCTTTCGGCCGTCGTAAACGACACCATCTCAAGCAACTTTTCTCTTGGAGGATGCACTTTAACGGTGATCGCCCCTGGGCCTAATGGGCCAACTATGGTTGGTATTGAGACAAGCCAGGCCCTT…
TtXIP1;2	ATGGGTGAAGGTATTTTAGTGTTTAGAGATTTCGAAAATCAAAATCAGCTGGATGGAGCAGCCATAGCTAGAATTCTTCCGATTTCAGCCACTCCCATACGGAAGGCTTTGAGCACTTTGTCTGTCTCAGGGAACATTGAGGACAAGAAGGTTGGATTGTTTGATGAACTTCTTCATCGGCTAGGCTTTGAAGAACTTTTCTCATTGCAGGTGTGGCGAGCATCCATGGCAGAATTACTAGGCACCGCGCTCCTAGTATTTATGGTAGATATGGTTGTCATCTCCTCCTTTGAGACAAGCACCAAGACTCCAAACATTGTAATGTCTTGCTTTGTTGCATTACTAATCACAATCCTCCTCCTTACTACAATCCCTGTCTCCGGTGGCCACATCAACCCG…

## Sheet: TtAQPs-cDNAs (including UTRs)
TtPIP1;1	ATCAAACCCACCACAGTCTCACACACCACACTTTCACAACAGTGAGAGCTTCTAGCCAGAGAGAGAAAAACAAGCTAACAATGGAGGGTAAGGAAGAGGATGTTAGACTAGGAGCCAACAAGTACTCAGAGAGGCAACCACTGGGTACAGTGGCTCAGGACAGAGACTACAGAGAGCCACCGGCTGCACCGTTCTTTGAGGCCGGTGAGCTGACGTCATGGTCCTTTTACCGTGCTGGAATTGCTGAGTTCATAGCCACCTTTTTGTTCCTTTACATCTCAATTTTGACTGTTATGGGAGTTAACAGGTCACCTTCAAAGTGTGGTACTGTTGGTATTCAGGGTATTGCCTGGGCTTTTGGTGGCATGATCTTTGCTCTTGTTTACTGTACTGCTGGAA…
TtPIP1;2	AAACCACCACAGTCTCACACACCATACTTTCAGAACAGTGAGAGCTTCTAGCCAGAGAGAGAAAAACAAGAGAGAGAAACAAGCCCAACAATGGAGGGTAAGGAAGAGGATGTTAGACTAGGAGCCAACAAGTTCTCAGAGAGGCAACCACTGGGTACAGTGGCTCAGGACAGAGACTACAGAGAGCCACCGGCTGCACCGTTCTTTGAGGCCGGTGAGCTGACTTCATGGTCCTTTTACCGTGCTGGAATTGCTGAGTTCATAGCCACCTTTTTGTTCCTCTACATCTCAATTTTGACTGTTATGGGAGTTAACAGGTCACCTACAAAGTGTGGTACTGTTGGTATTCAGGGTATTGCTTGGGCTTTTGGTGGCATGATCTTTGCCCTTGTTTACTGT…
TtPIP1;3	CCTCACCAAAACTGGGTTCACCTTTCTATAAAAGGATCCTATAACTCTAACCCAGTGCCACAATTAATCCCATTCCTTCAAAAACCTAGAGAGAGAAAGCTCAAAACAAATCTAGAGAGAGAAAGCTCAAAAACCAAAAAAAATGGAGGGGAAAGAAGAGGATGTGAAGTTGGGAGCTAACAAGTACTCAGAGAGACAACCATTGGGAACATCAGCACAGTCAAAGGACTACAAAGAGCCACCACCAGCACCCTTTTTTGAGCCTGGGGAGCTAACTTCATGGTCATTTTATAGGGCTGGAATTGCTGAGTTTATTGCCACTTTCTTGTTCCTTTACATTACTGTTTTGACTGTCATGGGTGTTAACCGCTCTCCTAGCAAGTGTGCCTCTGTTGGTAT…
TtPIP1;4	TATAAAAGGGTCCTCTGACTCTAACCCATTACCACAATTAGAATTAATCCCATTCCTTGAAAAACCTAGAGAGAGAAAGCTCAAAACAAATCTAGAGAGAGAAAGCTCAAAAAAAAAATGGAGGGGAAAGAAGAGGATGTAAAGTTGGGAGCTAACAAGTACTCAGAGAGGCAGCCATTAGGAACATCAGCACAGTCAAAGGACTACAAAGAGCCACCACCAGCACCCTTTTTTGAGCCTGGGGAGTTAACTTCATGGTCATTTTACAGGGCTGGAATTGCTGAGTTTATTGCCACTTTCTTGTTCCTTTACATTACTGTTTTGACTGTCATGGGTGTTAACCGCTCTCCTAGCAAGTGTGCTTCTGTTGGTATTCAGGGTATTGCTTGGGCTTTTGGG…
TtPIP2;1	CCCATCCACACCACTCAACAAAAACCATCCACTTCACTCTTAAGTAGCTAAAGAGCAAACAAGCTAAACAGCAATTCAACAAGAGGGAATTTTGAGGAGAGAGAAAGATGGGAAAGGATTTTGAGGCAGGAGAGGCAAGAGACATATCAAAGGACTACCAAGACCCACCACCATCACCTCTTTTCGACACCGAAGAGCTGACAAAATGGTCGTTCTATAGGGCTGTGATTGCTGAGTTTGTTGCAACTTTGTTGTTTTTGTACATCACTGTGTTGACTGTGATTGGGTACAAGAGTCAGTCTGATCCTATCAATGGACCTGATGCTGGTTGTGGTGGTGTTGGTATCCTTGGAATTGCTTGGGCTTTTGGTGGCATGATTTTCATCCTTGTTTACTGCA…
TtPIP2;2	AAACAAAAACCATCCACTTCACTCTCTTAAGTAAGCTAAAGAGCAAACAAGCTAAACATACAGCATTTCAAGAAGAGGGAATTTTGAGGAGAGACAAAGATGGGGAAGGATTTTGAGGCAGGAGGAGAGGCAAGAGACATAACAAAGGACTACCAAGACCCACCACCATCACCTCTTTTCGACACCGAAGAGCTGACAAAATGGTCGTTCTATAGGGCTGTGATTGCTGAGTTTGTTGCAACTTTGTTGTTTTTGTACATCACTGTTTTGACTGTCATTGGGTACAAGAGCCAGTCTGATCCTATCAATGGACCTGATGCTGGTTGTGGTGGTGTTGGTATCCTTGGGATTGCTTGGGCTTTTGGTGGCATGATTTTCATCCTTGTTTACTGCACCGCC…
TtPIP2;3	CACTCACAAAATCCATCCAAAAACAACCATCCGTCTCTGCTCACTCTCTCTCTCTCTCAAATTCCTTTCTCTTTCCAAAAAATGACAAAGGACATGGGAGCACCAACAGAGCAAGGCTCATTCTCAGCAAAAGACTACCATGACCCTCCCCCAGCACCTTTAATAGACCCAGGGGAGTTCGGCAAATGGTCATTTTACAGGGCTATCATTGCTGAGTTTGTAGCCACTTTGCTGTTTCTTTACATCACTGTTCTCACTGTGATTGGTTACAAGAGCCAAACTGACCCTGCTATGAACGCTGATGAGTGTGGTGGTGTTGGTATTTTGGGTATTGCTTGGGCCTTTGGTGGCATGATTTTCATCCTTGTTTATTGCACTGCCGGAATTTCTGGTGGGCAC…
TtPIP2;4	CAAATAACCCTCAATTTAAAACATTATACACAACAAAAAAAATTAAAATAAAAAATCAAACAAACCCCAACTCCATCCTTCGTCCTTCTTTTTCCTCTCCTCTCTCCTCCAATTCCCCATACCTCCACAACTACCTAAAAGAACAGCAAATTGCAATAAGACAAAAAATCAAGATCAAAACTACATCAAACATTCATCTGCAAACATTCATCCGCAAAGTGTAAAAATTAAAATTGCACCTGGGTTATTTATATTTATTCAGATCCCTATCATCTCCACCCACACCAAATTCTCTCTCCTCCCCAAATCCCCAATTCTCTGCAAATACCCACTATTCAAAAACTTATACCCAATTTCTTCATCTACCATAACCCATATCTCTCTTTCTCTCTCCTTTTT…
TtPIP2;5	ACCTTATTATCACTTCTCTACTCTACTCCAACACAACCCATTTTCTCTCTCCTAAATCACTCAACATGACCAAGGACGTGGAGGTAGCTGATCAGCAAGCTCCTGAGTTCTCAGCAAAAGACTACCATGACCCTCCACCAGCCCCTTTGATTGACATGGATGAGCTGAAAAAATGGTCATTTTACAGGGCTGTTATAGCTGAGTTTGTAGCAACTCTACTTTTCCTCTATATTACTGTCTTAACGGTTATTGGGTATAAGAGCCAGACTGATCCCGCCACCAACGCAGACCAGTGTGGTGGCGTTGGTATCCTCGGTATCGCTTGGGCCTTTGGTGGCATGATCTTCATCCTTGTTTACTGCACCGCCGGTATCTCCGGAGGGCACATCAACCCAGCTG…
TtPIP2;6	CACCTTATCACTTCTCTACTCTACTAATACAATACAACCCATTTTCTCTCTCCTAAATCACTCACCATGACTAAGGACGTGGAGGTAGCTGATCAGCAAGCTCCTGAGTTCTCAGCAAAAGACTATCATGACCCTCCACCAGCCCCTTTGATTGACATGGATGAGCTGAAAAAATGGTCATTTTATAGGGCTGTCATAGCTGAGTTTGTAGCTACTCTACTTTTCCTCTATATTACTGTCTTAACGGTGATTGGATACAAGAGTCAGACCGATCCCGCCACCAACGCCGACCAGTGTGGTGGCGTTGGCATCCTCGGTATCGCTTGGGCCTTTGGTGGCATGATCTTCATCCTTGTTTACTGCACCGCTGGTATCTCCGGAGGGCACATCAACCCAGCT…
TtPIP2;7	AGTGTCAAATTAGAGCTCACTAGAAAAACACCCAACCCTAGAGAGAGAAAGAAGAAAGAAAGAGAGAGAAAAGATGTCAAAGGAAGTGAGTGAGGAGGGACAAGGGCTTGGACACCAGCATGGCAAGGACTACGTTGATCCACCACCAGCACCTTTGTTTGACATGGGTGAGCTCAAGCTCTGGTCTTTCTACAGGGCCTTAATTGCTGAGTTCGTAGCTACTCTTTTGTTCCTCTATGTCACTGTTGCTACTGTCATTGGCCACAAGAAACAAACTGGCCCTTGTGATGGTGTTGGTCTTCTTGGTATTGCTTGGGCTTTTGGTGGCATGATTTTCATCCTTGTTTACTGCACCGCCGGTATCTCTGGAGGACACATCAACCCAGCAGTGACATTCGG…
TtPIP2;8	CAAAATAATACCCTAAGCTTATCCGTAACTCCCCCAAAATTCTAGCACCATCTGCCACTACCAATCCTCTTTATAAAGAAACCTCCACTACTCACAAACCTCAGTGTCAAATTAGAGCTCACTAGAAAAACACCCCCAACCCTAGAGAGAGAAAGAAGAAAGCTAAGAGAGAGAAAAGATGTCAAAGGAAGTGAGTGAGGAGGGACAAGGGCTGGGACACCAGCATGGCAAGGACTACGTTGATCCACCACCAGCACCATTGTTTGACATGGGTGAGCTCAAGCTCTGGTCTTTCTACAGGGCCTTAATTGCTGAGTTCGTAGCTACTCTTTTGTTCCTCTATGTCACTGTTGCTACTGTCATTGGCCACAAGAAACAAACTGGCCCTTGTGATGGTGT…
TtPIP2;9	AAATATCCATATATACACCACTCACCCCCCAAAAAACATATAACTTCATTCACTCTCTCTAAGAAGCTAATAAGTTGAATCGAACAAGAGAGAGAAAAATGGGAGATCAGGAGGACATGGAGGAGTATGTAGCACCAGGACAGCTACCGAAGAACTACCACGACCCACCGCCGTCGCCGTTTTTCAACATTGAGGAGCTGACAAAGTGGTCGTTTTATAGGGCATTGATAGCTGAGTTCGTTGCTACTATGTTGTTCTTGTACATCGCTGTCTTGACTGTCATTGGCTACAAGAGCCAGTCCGACACCACCGTCGTCGCCAACGGACCCAATGCTGGGTGTGGTGGCGTAGGCATCCTTGGGATTGCTTGGTCATTTGGTGGCATGATCTTTGTTCTTG…
TtPIP2;11	ATGGCAAAGTTGAAGATCAAGCAGGGTGCGGTGAAGGTGTTGGAGCCATGGATTGAGGCTTTGCCAGACCGTATCGTTGTTTATTACCCACTCAAATCTTCTTTCAAAACTCCAAAGCTCGAAACAATTGAGGAGGAGAGGGATGAACAACGAGATGACGAACGTCATGCATGTAACTACAGGCAATACATTTCGTCGAGATGTCCGAGCAACGTGCTCCTGAGTTCTCAGCAAAAGACTACCATGACCCTCCACCAGCTAGCTGCATTGATTGACATGGATGAGCTCAAAAAATGGTCATTTTACAGGGCTGTCATAGCTGAGTTTGTAGCAACTCTGCTTTTCCTCTATATTACTGTCTTAACGGTTATTGGTTATAAGAGCCAGACTGATCCTGCC…
TtPIP2;10	ATATAACTTCGTTCACTCTCTCTAGCTAGCTAAGAAGCTAAGCACCACTTGAATCGAACAAGAGAGAGAAAAATGGGAGATCAGGAGGACATGGAGGAGGAGTACGTAGCACCAGGACAGCTACCGAAGAACTACCACGACCCACCGCCGTCGCCGTTTTTCAACCTTGAGGAGCTGGCAAAGTGGTCGTTTTATAGGGCATTGATAGCTGAGTATCCTTGGGATTGCTTGGTCCTTTGGTGGCATGATCTTTGTTCTTGTTTACTGCACGGCTGGTATCTCAGGTGGGACATAAACCCAGCAGTGACATTTGGGTTGTTTTTGGCTCGAAAGGTATCGGTTATACGAGCCATATTGTACATGTTAGCCCAATGCTTGGGTGCAATCTGCGGTGTTGGG…
TtTIP1;1	GGAGATCAGAAATAGAGAGAGAAAACCCCTTTCATTTCCATTATCACAATTAATTAATTATCTCTCTTAATTAATTACACAAACAAAAATGCCTATCAGAGAGATTAGTGTTGGAAGGCCTGAAGAGGCATACCACCCAAACACCCTAAAGCAGGGTTTAGCTGAGTTTATCTCAACTGTTATCTTTGTCTTCGCCGGCGAGGGTTCCGGCATGGCTTTCGCTAAGTTAACCGAAGGCGCTGCCGGAACCCCCGCCGGCCTTGTAGCCGCTGCTATTGCACATGCTTTTGCGCTTTTCGTAGCGGTTTCCGTTGCCGCTAATGTCTCTGGTGGACATGTTAACCCTGCTGTCACTTTTGGTGCCTTTGTTGGTGGTAACATTTCTCTCCTACGTGGGAT…
TtTIP1;2	ACTCCCTTCACCCCCCAGACCCCTCCCTTCTCCCCCCATTATAAAGTACGTGTTCCCCATTGTGAAGTGGAGATCAGAAACCCCTTTCATTTCCATAATCACAATCTTAATCTCTCTTAATTAATTAGTTAATTATTATTATTATACAAACAAAATGCCTATCAGAGAGATTAGTGTTGGAAGGCCTGAAGAGGCATACCACCCAAACACCCTAAAACAGGGTTTGGCTGAGTTTATCTCAACTGCTATCTTTGTCTTTGCCGGCGAGGGTTCCGGCATGGCGTTCGCTAAGTTAACCGAAGGCGCTGCTGGAACCCCCGCCGGCCTTGTAGCCGCTGCTATTGCACATGCCTTTGCGCTTTTCGTAGCGGTTTCCGTTGCCGCTAATGTCTCTGGTGG…
TtTIP1;3	ATCAAAGATAGCTAAGAAGAGCAAGTTAAGGTCTCTTTGCATATATAGCAAGAGCAACTTAGAGGTCGATAGCAACGAATTTCACTAGCATCTTGAGAATGGCGATCCCAAGACTCGCTCTCGGGTCTCCAGCTGAGGCTAGCCACCCCGGTGCCCTCAAAGCTGCATTGGCTGAGTTCATTTCCATGCTCATTTTTGTCTTTGCTGGAGAAGGCTCTGGCATGGCATTCAGTAAGCTTACAGACAATGGCTCGGCCACTCCAGCAGGGCTGGTAGCTGCTGCATTGTCCCATGGATTCGCACTTTTTGTAGCTGTCTCAGTGGGCGCTAACATCTCCGGTGGACATGTGAACCCTGCTGTCACCTTTGGTGCCTTCCTTGGGGGAAAGATCTCCTTCA…
TtTIP1;4	ATCAAAGATAGCTAAGAAGAGCAAGCCTAGGTCTCTTTGCATACATAGCAAGAGCAACTTAGAGGTCGATAGCAAACCAACATCTTGAGAATGGCGATCCCAAGACTCGCTCTCGGGTCTCCAGCTGAGGCTAGCCACCCCGGTGCCCTCAAAGCTGGATTGGCTGAGTTCATCTCCATGCTCATCTTTGTCTTTGCTGGGGAAGGCTCTGGCATGGCATTCAGCAAGCTTACAGATAATGGCTCGGCAACTCCAGCTGGGCTGGTAGCCGCTGCATTGTCCCATGGATTCGCACTTTTTGTAGCTGTCTCAGTGGGTGCTAACATCTCCGGTGGACACGTGAACCCTGCTGTTACCTTTGGTGCCTTCCTTGGGGGTAAGATCTCCTTGATAAGGACC…
TtTIP1;5	ATGAATTTGGGGATTGCAGGCAAACTGACAGACAATGGTGCAGCAACACCAACAGGGCTAATAGCAGCAGCATTGACCCATGCATTTGCACTAATTGTGGCAGTTTCAGTTGGTGCCAACATTTCAGGGGGTCATGTTAACCCTGCTGTTACCTTTGGTGCCTTTGTGGGAGGTCACATTACCTTGTTGCGTGCCATCTTGTATTGGATTGGTCAATTGTTTGGATCCGTTGTTGCTTGCTTGCTTCTCAAATTCGCTACCGGAATGGAAACATCAGCATTTGCATTATCTGCCGGGGTAACCTCATGGAATGCAGTTGTATTCGAGATTGTGATGACATTTGGGCTTGTCTACACAGTTTATGCCACAGCTGTAGACCCAAAGAAAGGCACCATAGGC…
TtTIP1;6	ATGCCAATATATAGAATAGCAGTGGGTAATCCAGGGGAGGCAAGCCATCCAGATGCCTTGAGAGCGGCGCTCGCGGAGTTCTTCTCCATGATCATCTTCGTCTTCGCCGGACAAGGATCCGGCATGGCCTTTAGCAAACTGACAGACAATGGTGCAGCAACACCAACAGGGCTAATAGCAGCAGCATTGGCCCATGCATTTGCACTAATTGTGGCAGTTTCAGTTGGCGCTAACATTTCAGGGGGTCATGTTAACCCTGCTGTTACCTTTGGTGCCTTTGTTGGAGGTCACATTACCTTGTTGCGAGCCATCTTGTATTGGATTGGCCAACTCTTTGGATCTGTTGTTGCTTGCTTGCTTCTCAAATTCGCTACCGGAATGAAGGAAACATCAGCATTT…
TtTIP2;1	GTGGTATCTGAAAGCCAAACTCACTATTTGTGTCTCAAAACCTCTTTTCTTTCCATTTCTTATCTTAATTTAGTAGGCAAGAGAGAGAGAGAGAGAGAGAGTAATGGCAGGACTTGCCTTTGGGAGATTTGATGACTCTTTCAGTTGGGCCTCAATTAAGGCTTACATAGCTGAATTCATCTCTACATTGCTCTTTGTCTTTGCTGGTGTAGGCTCTTGCATTGCTTTCAGCAAGTTGACAGCTGATGCAGCCCTTAGCCCATCTGGGTTGGTAGCAGTTGCTGTATGCCATGCATTTGCCCTGTTTGTGGCAGTCTCAGTGGGTGCTAACATCTCCGGTGGCCATGTCAACCCTGCCGTTACCTTCGGATTGGCTCTCGGCGGCCAGATCACCATCCT…
TtTIP2;2	CATGGTTGCTATATATAGATGTGATGTGGAAAGGCCCCTTTGTGTTATCTGAAAGCCAAACTCACTATTTGTGTCTCAAAACCTCTTTTCTTTCCCTTTTTTCTTATCTTTAATTAGTAGCAAGAGAGACATAGCCATGGCAGGGCTTGCCTTTGGGAGATTTGATGACTCTTTCAGTTGGGCCTCAATTAAGGCTTACATTGCTGAATTCATCTCCACATTGCTCTTTGTCTTTGCTGGTGTTGGCTCTTGCATTGCTTTCAGCAAGTTGACAGCTGATGCAGCCCTTAGCCCATCTGGGTTGGTAGCAGTTGCTGTATGTCACGCATTTGCCCTGTTTGTTGCAGTTTCAGTGGGTGCTAACAACTCCGGTGGCCATGTCAACCCCGCCGTCACCTT…
TtTIP2;3	ATGGTGAAGTTGACTTTTGGTAGCTTTGGGGACTCTTTCAGTGTTGCATCACTCAAGGCTTATTTGTCTGAATTCATTGCAACTCTCCTCTTTGTGTTTGCAGGAGTAGGTTCTGCAATAGCTTTCAGCAAATTGACAAGTGATGGAGCATTGGACCCAGCAGGGCTAGTTGCAGTAGCTGTGGCTCATGCATTCGCATTATTTGTTGGGGTTTCCATAGCAGCTAACATTTCAGGTGGACACTTGAACCCAGCTGTCACCTTTGGATTGGCCATTGGAGGCAACATTACCCTCCTCACTGGACTCTTCTACTGGGTTGCCCAAGTCCTTGGCTCCGTTGTTGCTTGCCTCCTCCTCAAATTTGTCACCAATGGCAAGAGCATCCCAGCTCATGGAGTT…
TtTIP2;4	ATGGTGAAGTTGACTTTTGGTAGTTTTGGTGACTCTTTCAGTGTTGGATCACTCAAGGCTTATTTGTCTGAATTCATTGCAACTCTCCTCTTTGTATTTGCAGGAGTAGGTTCTGCAATTGCTTTCAGCAAATTGACAAGTGATGGAGCATTGGACCCAGCAGGGCTAGTTGCGGTAGCCGTGGCTCATGCATTCGCATTGTTTGTTGGAGTTTCAATAGCAGCTAACATTTCAGGTGGACACTTGAACCCAGCTGTCACCTTTGGATTGGCCATTGGTGGCAACATCACCCTCCTCACTGGACTCTTCTATTGGGTTGCACAAGTCCTCGGCTCCGTTGTTGCTTGCCTCCTCCTCAAATTTGTAACCAATGGAATGAGCATCCCAGCTCATGGAGTT…
TtTIP2;5	GCCACCTAGAACATAACTTTGAATTAACTAAAACCATTGAATAGCTAAGTTTTGAGTTTAATAAAAATGGTGAAGTTGGATTTTGGTAGCATTGGTGACTCTTTTAGCGTTAGTTCACTCAAGGCTTACTTAGCTGAATTTATTGCCACCCTCCTTTTTGTATTTGCAGGAGTGGGTTCTGCAATTGCTTTCAGCAAGCTCACGAGTGATGGAGCACTAGACCCAGCAGGGCTAGTTGCAGTGGCTCTAGCTCATGCATTTGCATTGTTTGTTGGAGTGTCCATAGCAGCCAACATTTCAGGTGGACATTTGAACCCAGCTGTTACCTTTGGATTGGCCATTGGAGGCAACATTACTATCCTCACTGGCCTTTTCTATTGGGTTGCCCAAGTCCTTGGC…
TtTIP2;6	AGAACTTTGAGTTAACTAATTAAACCATTCCCCTAATCAATATTTTTGAGATTAATCAACATGGTGAAGTTGTGTTTTGGTAGCATTGGTGACTCTTTTAGCGTTAGTTCACTCAAGGCCTACTTAGCTGAATTTATTGCCACTCTCCTTTTTGTTTTTGCAGGAGTGGGTTCTGCAATAGCTTTCAGCAAGGTAACAAGTGATGGAGCACTAGACCCGGCAGGGCTAGTTGCAGTGGCTCTAGCTCATGCATTTGCATTGTTTGTTGGGGTGTCCATAGCAGCCAACATTTCAGGTGGACATTTGAACCCAGCTGTTACCTTTGGATTGGCCATTGGAGGCAACATTTCTATCCTCACTGGCCTTTTCTATTGGGTTGCCCAAGTCCTTGGCTCCGTT…
TtTIP3;1	CCTCTCTCTCCATTCTCCATTATTACTTCCTTTCTCATCTTACACACACTCTCTCTCTTTGATCACCACTTTGACACGGTGTGAAGTGCATGCAACAAACAAATCAGACCACAAAGCTGATTTTGGTACAGCCCAACATAACCAGCTAAGTGTAACCATATTATCAAAGAACAACAAGGTTTTGGTGGTATTTTCTGAGTTTTGGTGTCAATTCTTTGCAAGGATATATTTCATAACTTGGCTTGGCTAGTGAGGATCTCAAGAAAGCTAAGGGACGATGGCACCGCCTCGTAGATACGCGTTCGGAAGGCCGGAAGAGGCCACACACCCAGACTCCATTAGAGCCACTTTGGCTGAATTCATCTCAACTTTTATTTTCGTCTTTGCTGGCGAAGGCTC…
TtTIP3;2	CTTCCTTTCTCACCTACACACTCTCTCTCTCTCTTTGATCACCACTTTGACACGGTGTGAAGTGCATGCAACAAACAAAGCAGACCACAAAGCTGATTTTGGTACAGCCCAACATAATAACCAGCTAAGTGTAACCATATTATCAAAGAACAAGGTTTTGGTGGTATTTTCTGAGTTTTGGTGTCAATTTTTTGCAAGGATATATTTCATAACTTGGCTTAGCTAGTGAGGATCTCAAGAAAGCTAAGGGACGATGGCACCGCCTCGTAGATACGCGTTCGGAAGGCCGGAAGAGGCCACACACCCAGACTCCATTAGAGCCACCTTGGCTGAATTCATCTCAACTTTTATTTTCGTCTTCGCTGGCGAAGGCTCTCTCCTCGCTCTTCGGAAGCTATA…
TtTIP4;1	ATGGCGAAGATAGCGCTAGGAACAAGCCGTGAGGCAATGCAACCAGATTGCATCAAAGCCCTGGCTGTTGAATTCATTTGCACTTTCCTTTTCGTATTCGCCGGTGTCGGATCTGCCATGGCCGCCGATAAGGTGGGAGCAGATCCGCTTGTCGGACTGTTATTTGTGGGGACAACACACGCATTTGCAGCAGCGGTGATGATAGCAGCCGGGTTCAACATATCAGGGGGGCACCTGAACCCAGCGGTGACGGTTGGGCTAGCAGCTGGTGGTCATATCACCGTGTTCAGATCTATTCTCTATATCATTGACCAATGCGCTGCTTCTGCTGCTGCTTGTTTCCTCCTCAAATATTCCACTGGAGGATTGGTATTTATTTCTTTGATTATTGATTCAATG…
TtTIP4;2	AACAAACTCCAGCATAAGTAGTCATTCCAAAGTTGCTCATTAGCAGATACAAGACCAAAAGGATCATATGGCGAAAATAGCGTTAGGAACAAGCCGTGAGGCAATGCAAGTAGATTGCATCAAAGCCCTGGTTGTTGAATTCATTTGCACTTTCCTTTTCGTCTTCGCCGGTGTCGGATCTGCCATGGCCGCCGCTTGTCGAACAGATAAGGCGGGAGCGGATCCCCTTGTCGGACTATTATTTGTCGGGACAACACATGCATTTGCGGCAGCGGTGATGATAGCAGCCGGGTTCAACATATCAGGGGGGCACCTGAACCCAGCGGTGACAATTGGGCTAGCAGCTGGTGGTCATATCACCGTGTTCAGATCTATTCTCTATATTATTGACCAATGCGC…
TtTIP5;1	ATGGCACCAAGAACAACATTTAGCGCCCATTTCAAGCAATCAGTAACCCCAAATTCTCTGAGATCATACCTTGCTGAATTTATCTCCACCTTCATCTATGTCTTGGCTGCCGCCGGATCCGTCATGGCATCAAGGAAACTGATGCCGGATGCAAGATCTGACCCTGCTAGCCTAGTGGTGGTTGCCATGGCGAATGCATTTGGCCTTACCTCGGCCGTCTACATTTCCGCTAGCGTTTCCGGTGGCCATGTCAACCCGGCCGTCACATTCGGCAAGGTGGTGGGATGTCACATTCCTATTCCTACTGCTCTATTCTACTGGATTTCCCAGATTCTTGGATCTGTTATGGCTTGCCTCCTCCTCAAAGTCACCACTGTTGATCAAAATGTTGTGACCCAT…
TtTIP5;2	ATGGCACCAAGAACAACATTTAGCGCCCATTTTAAGCAATCAGTAACCCCAAATTCTGTGAGATCATACCTTGCTGAATTTATCTCCACATTCATCTATGTCTTGGCTGCCGCCGGATCCGTCATGGCATCTAGTAAGTTTTCTTTGCCAAAGTTCTGAAAATTCCTGTCCTCATTAATTTTATTTACATCTAAGTTTTTTTATCTGTTTCCCTTTGTGTTGTTGGTTTTTTTTTTTTAAGGGTCCCTTTGTGTTGTTTATGTTTACTATATGTGCATAACAGCATAAATTCATAAATGTTGAGTATTTCAGTTTCTCATACCTTACGATACAAATTAAATTATGATTTGGTGAGGGGTTTTTTCATTTTGATTACTACTGTCTTGCCACACGTAAATT…
TtNIP1;1	GGACTTTGTACCCCCTTTGGTATTGGAGTTATAAAACCTTACCCACCTTGGCTCATATTTTTATCTTTGTACTTCTTTGTGTCATAACTCATAAGACTCAAAGGTCATCTATCCTTCCTTAATTAGTCTTAAGATGGGTGAAATTGCAAGAGCTAATGGCAACCATGAAGTCACCTTGAATGTCAAGGATGGTGCTGAAACTCTCCCTCAAAACACTACTACCAATAATTCCTCTGCTTCTAACTTCAATGACAACCGCTCTGGTTCTAGCTGCATCAGTATCCCCTTTCTGCAAAAGATGATTGCGGAGGCACTAGGGACATACTTTGTGATATTTGCGGGGTGTGCGGCGGTGATAGTGAACAAGGATGAAGAGAAAGTGGTGACTTTACCAGGAAT…
TtNIP1;2	GAGTTATATAACCTTACCCACCTTGGCTCATATTTTTGCCCTTGTACTTCTTCTTTGTGTCATAACTCATAAGACTCAAAGGTCATCTATCCTTCCTTAATTAGTCTTAAAATGGGTGAAATTGCAAGAGCTAATGGCAACCATGAAGTCACCTTGAATGTCAAAGATGGAGCTGAAACTCTCCCTCAAAACCATGCTACCAGTAATTCTTCTGCTTCTAACTTCAATGACAACCGCTCTGCTGGTTCTAGCTGCATCAGTATCCCCTTTCTGCAAAAGATGATTGCGGAGGCACTAGGGACATACTTTGTGATATTTGCGGGGTGTGCGGCGGTGATAGTGAACAAGGATGAGCAGAAAGTGGTGACTTTACCAGGAATTTCAATAGTTTGGGGTGGT…
TtNIP2;1	ATGACACCGCCAACAAAGATCAATCATGTTGATGATGACCAGAGCCTGCGAAAACTTGAAGAAGGATGCGTCACCATATTGCGACAACCTCTGAAAACTTCTCTTGACCCATCTTCTTGTTCATCAACTGCTACACTAGTCATTTTGCAAAAGCTGTTAGCAGAGGTGATTGGTACATATTTCATAGTGTTCACTGGGTGTGCCGCGATAGTGATAGAGAAAACAAATGGTTCAGTGACATATCCAGGCATTTGTGTTACTTGGGGCTTGATCATTATGATTGTGGTTTACACCTTCGAGCACATTTCTTGCCATTTTAACCCCGCTGTCACTATCACTTATACCCTCCTTAGAGGCTTCCCTTTCAAGCAGGTTCCACTTTATATAAGTGCTCAAATA…
TtNIP2;2	ATGACACCGCCAACAAAGATCAATCATGTTGATGATGACCAGAGCCTGCGAAAACTTGAAGAAGGATGCGTCACCATATTGCGACAACCTCTGAAAACTTCTCTTGACCCATCTTCTTGTTCATCAACTGCTACACTAGTCATTTTGCAAAAGCTGTTAGCAGAGGTGATTGGTACATATTTCATAGTGTTCACTGGGTGTGCCGCGATAGTGATAGAGAAAACAAATGGTTCAGTGACATATCCAGGCATTTGTGTTACTTGGGGCTTGATCATTATGATTGTGGTTTACACCTTCGAGCACATTTCTTGCCATTTTAACCCCGCTGTCACTATCACTTATACCCTCCTTAGAGGCTTCCCTTTCAAGCAGGTTCCACTTTATATAAGTGCTCAAATA…
TtNIP2;3	ATGACACCGCCAACAAAGATCAATCATGTTGATGATGACCAGAGCCTGCGAAAACTTGAAGAAGGATGCGTCACCATATTGCGACAACCTCTGAAAACTTCTCTTGACCCATCTTCTTGTTCATCAACTGCTACACTAGTCATTTTGCAAAAGCTGTTAGCAGAGGTGATTGGTACATATTTCATAGTGTTCACTGGGTGTGCCGCGATAGTGATAGAGAAAACAAATGGTTCAGTGACATATCCAGGCATTTGTGTTACTTGGGGCTTGATCATTATGATTGTGGTTTACACCTTCGAGCACATTTCTTGCCATTTTAACCCCGCTGTCACTATCACTTATACCCTCCTTAGAGGCTTCCCTTTCAAGCAGGTTCCACTTTATATAAGTGCTCAAATA…
TtNIP3;1	GGGGGCCCTTCACTACTACTTCATCTCTCTACCTTCTCATACATTTTGCTTTCCAGGGCACTTGGAGGTTGTATTTATCTTTAGCCAAAAAAAAAAAAGAAGAAGAAGAAAGAAACAATGGATACAAACTCACAAATTGCTCCATCTTCAAAGAAAGGACAAAATATATATCATGTCCTCATGACATCCTTTAATCAACATTACCCACCAGAATTTATTCGTCAGGTGGTAGCGGAGATCATAGCAACATATCTGCTAGTGTTTGTAACGTGCGGGGCTGCAGCCATTAGCGCGACGGACGAACGGAGAATAGCGAGGCTGGGTGCCTCTCTTGTTGGAGGGATGATTGTCACGGTGATGATATACGCTGTTGGTCACATTTCTGGTGCTCATATGAAC…
TtNIP4;1	ACTCCTCCTCCTCCTCCTCCTGTTAATTAGTGTGTGAAAGGGTAAGATTAGTTGGATGGATAAGGGAGTAGATCAAGTGAATATTGAGTACTTATCCTCATAATTTGGCAATTCCCCAAAAACAGCAGTTATTGCAGTTAGTTGTCTTGCCTTTTTTTAACACCTATCCCCCATCATCTTCTTTCCTTCAACTAAATCAAACATTATTTTGCTTGCTTACACATTTGCTCCCCATTCACTCCATAAACAGGGAAAAAATCAACATTATTTGTGTTTTTGTTCCATTAACAAGGATCTCATCCCTTTTTTTTTTTTTTTTTTTTACTAATTCATTATTGTTATTGTTGAAGAATTAGTTATTGGTATTTTGTGATCGAGTAATTAATTATGGGTACAAAT…
TtNIP4;2	AAAACAGCACTTATTACCAACTGATTCGCAGTTATATTTCCTTTTTTAACACCCATCCCCATCACCTTCTTTCCTTCAACTAAATCAAACATTTTTTTGCTTGTTACATATTTGCTCCCCGTTCACTCGCATAAACAGGGAAAAACATAATATTTGTGTTTTTGTTCCATTAAGAAGGATCTCATCCCTTTTTTGAATCGTTATTGTTATTGTTGGAAAATTACTTACTGGTATTTTGTGATCGAGTAATTAATTATGGGTACAAATACAAATACTGATGACATTCTTCAAGAAGAAGATTTGAAAAAGGTTGAAGAAGGCAATGGCAATGGCATTGGCACCTCATCAAAATTTGATTCCTTTTGTTCTTCTCCATCTGTCGTCTGCTTAACACAAAAG…
TtNIP5;1	CTCACTTGTTGCCAAAATAACCTTAATACAATATCACTCTCTCTCTTCTCATTCCTCATTTTTCTTCCAATCTCAATTCCCCTGTTTAGTTTTTGCTTGGTTCTGTTTTCAGTTTTTGATGCATTTTCATAGTTTGTTCATCAACTTCTTGTATTGATTTCGAACTTGCTTTGATCCGCTGGCTCTAATCACCACCATTATTACACCGTAAAAACACCACAAAAAAATCTTCCAAATTATGTAATCTCTGCCCAATCTTACTCTTTTGATCCCCAAAAAAACCCAAAAAAAATTCTATTCTTTGAAGATTCTGAACATTTTTATGCTTATGTCTATCTAGTTATTCTCTTCTCTTGGTTAGTTATAGTGGCTACAATTCAACCCAAACCTTAGCTTCAA…
TtNIP5;2	TTTTGGATTGATTTAAACTCATAGAAACGCTCACAAGCCCTCCAATCACATCACTCACTTGTTGCCAAAATAACCTTAATACAATATCACTTTCTCTTCTCTTCTCTCTCCTCATCACATTTCTTCATTTCCTTCTAATCTCAATTCCCCTGTTTAGTTTTTGCTTTCGATTTTTGATGCATTTTCATAGTTTGTTCATCAACTTCTTGTATTGATTTCCAACTTGCTTTGATCGTGGCTCTAATCACCACCATTACAACACCGTAAAAACACCTCAAAAAAAATCTTCCAAATTATGTAATCTAAGCCCAATCTTACTCTTTTGATCCCCAAAAAAAAAACCCAAAAAAATTCTATTCTTTGAAGATTCTAAACATTTTTATGCTTATGTCTGTCTAG…
TtNIP6;1	GGACTAAATCAGCAGCTTCAGTTCTGCAGAAATACAACTATACAAGTACTTTCTCACTCTCTTAACTTCTGTATTATGCAAAATATGGATGCTGAGGATACTGCTTCGATGCCTTCAACTCCAGTGACCCCCGGCACCCCTGGGGCTCCCCTCTTTGGGGGATTCAGGGGAGATAGACCCACGACAACCCCTAGGAAGTCCCTTCTCGGTAACTGCTTCACTGTCGAAACCTGGCCTAATGAAGAAGGGAGCTTGCCAGCCGTGACCTGCACTATGATGATGCCACCTCCCCCCGTCCCTGTTGCTAAGAAGGTTGTGGCAGAGTTCATAGGCACCCTTATACTCATATTTGCTGGGACAGCCACAGCTATTGTGAACCAGAAGACACCAGGCTCAGAA…
TtNIP6;2	GGACTAAATCAGCAGCTTCAGCACTGCAGAAATACAACTATACAAGTACCTTCTCTATCTCTTAACTTCAGTGTTACGCAAAATATGGATGCTGAGGATACAGCTTCAATGCCTTCAACCCCAGTGACCCCAGGCACCCCTGGGGCTCCCCTCTTTGGGGGATTCAGGGGAGATAGACCCACGACAACCCCTAGGAAGTCCATTCTCGGTAACTGCTTCACTGTCGAAACCTGGCCTAATGAAGAAGGGAGCTTGCCTGCTGTGACCTGCACCATGATGATGCCACCTCCCCCCGTCCCTGTTGCTAAGAAGGTGGTGGCAGAGTTCATAGGCACCCTTATACTCATATTTGCCGGGACAGCCACAGCTATTGTGAACCAGAAGACACCAGGCTCAGAA…
TtNIP7;1	ATGGCGGGCAATTGTGATGAGATGTCACCGTCGACAGAAACACCAGCTACCGGCAATCGGTCGTTGACTAAACTATCTGCGTCGTCTAGGATGCTCAGCGTTACACTTCTTAAAAAGGCTGGTGCAGAATTTATAGGGACGTTCATATTAGTATTCGCAGCAGCAGCAGGCCCAATTGTGGACCAAAAGTACAACGGTGTTGAAACCTTGATTGGCAACGCAGCATGTTCAGGCTTGGTGGTGATGATACTGGTCCTATCAATAGGCCACATTTCTAAAGCCCATCTTAACCCAGCTGTAACCATTGCATATGCAAGTCTAAGACATTTCCCTTGGGCCCAAGTACCCATCTTCATTGTGGCTGAACTACTTGGATCCATATCCGCCTCGTTCTTGCTT…
TtNIP7;2	ATGGCGGGCAATTGTGATGAGATGTCACCGTCGACAGAAACACCAGCTACCGGCAATCGGTCGTTGACTAAACTATCTGCGTCGTCTAGGATGCTCAGCGTTACACTTCTTAAAAAGGCTGGTGCAGAATTTATAGGGACGTTCATATTAGTATTCGCAGCAGCAGCAGGCCCAATTGTGGACCAAAAGTACAACGGTGTTGAAACCTTGATTGGCAACGCAGCATGTTCAGGCTTGGTGGTGATGATACTGGTCCTATCAATAGGCCACATTTCTAAAGCCCATCTTAACCCAGCTGTAACCATTGCATATGCAAGTCTAAGACATTTCCCTTGGGCCCAAGTACCCATCTTCATTGTGGCTGAACTACTTGGATCCATATCCGCCTCGTTCTTGCTT…
TtNIP7;3	ATGGCGGGCAATTGTGATGAGATGTCACCGGCGACAGAAACACCAGCTACCGGCAATCGGTCGTTGACTAAACTATCTGCGTCGTCTATGATGCTCAGCGTTACACTTCTTAAAAAGGCTGGTGCAGAATTTATAGGGACGTTCATATTAGTATTCGCAGCAGCAGCAGGCCCAATTGTGGATCAAAAGTACAACGGTGTTGAAACCTTGATTGGCAACGCTGCATGTTCAGGCCTGGTGGTGATGATACTAGTCTTATCAATTGGCCACATTTCTAAAGCCCATCTTAACCCGGCAGTCACCATAGCATATGCAACTCTAAGACATTTCCCTTGGTCCCAAGTACCCATCTTCATTGTGGCCGAACTACTTGGATCCATATCCGCCTCGTTCTTGCTT…
TtNIP8;1	ATGTTAGGAGAATCCTTAAGACCAAATGGGCAGTCCCAAAAAGAAGAATCAGCAAGTGGGCAATTGCAAAATAATCAACAACAGATGAGGGCTGCTCATGCTGAAAGTGTTCATGAACATGATGATATCGATCGATCATTTCCTCGAAACGAGATTCAAAAATTCGCCTTGGGATTCATTCCTAGAGGATGGTCATCATGGAATATAAATCCTGCTCGTCCTATGTTAGCAGAAATGCTAGGAACATTCATGTTGATATTCTGCATATGTGGGATACTAGGGAGTATGGAATTGGTAGGAAACCAAGTGGGTCTTATGGAGTATGCTACCACAGCTGGTGCTGCCATAATTGTGATTGTTTTCTCTCTAGGCCGGGTCTCCGGTGCTCATGTAAATCCT…
TtNIP8;2	ATGTTAGGAGAATCCTTAAGACCAAATGGGCAGTCCCAAAAAGAAAAATCAACAAGTGGGCAATTGCAAAATAATCAACAACAGATGAGGGCTGCTCATGATGAAAGTGTTCATGAACATGATGATATCGATCGATCATTTCCTCGAAACGAGATTCAAAAATTCGCCTTGGGATTCATTCCTAGAGGATGGTCATCATGGAATATAAATCCTGCTCGTCCTATGTTAGCAGAAATGCTAGGAACATTCATGTTGATATTCTGCATATGTGGGATACTAGGGAGTATGGAATTGGTAGGAAACCAAGTGGGTCTTATGGAGTATGCTACCACAGCTGGTGCTGCCATAATTGTGATTGTTTTCTCTCTAGGCCGGGTCTCCGGTGCTCATGTAAATCCT…
TtNIP8;3	ATGTTAGCAGAAATGCTAGGAACATTCATGTTGATATTCTGCATATGTGGGATATTAGGGAGTATGGAATTGGTAGGGAACCAAGTGGGTCTTATGGAGTATGCTACCACAGCTGGTGCTGCCATAATTGTGATTGTTTTCTCTCTAGGCCGGGTCTCCGGTGCTCATGTAAATCCTGCTGTCACAATAGCCTTTGCTGTATTTGGTCATTTTCCATGGTCCAAGGTACCCTTCTATGTGGGTGCACAGCTGCTAGGCTCTATATTGGCAACATACACAGGGGAGCTTGTTTATGGAGTGAAAGCAGAGCTGATGACCACCAACCCTATCCAAGGTAGAGCTTCCTCAGCCTTCTGGGCTGAATTTGTCGCAAGCTTTATCGTCATGTTCGTTGCTACA…
TtNIP8;4	ATGTTAGCAGAAATGCTAGGAACATTCATGTTGATATTCTGCATATGTGGGATATTAGGGAGTATGGAATTGGTAGGAAACCAAGTGGGTCTTATGGAGTATGCTACCACAGCTGGTGCTGCCATAATTGTGATTGTTTTCTCTCTAGGCTGGGTCTCCGGTGCTCATGTAAATCCTGCTGTCACAATAGCCTTTGCTGTATTTGGTCATTTTCCATGGTCCAAGGTACCCTTCTATGTGGGTGCACAGCTGCTAGGCTCTATATTGGCAACATACACAGGGGAGCTTGTTTATGGAGTGAAAGCAGAGCTGATGACCACCAACCCTATCCAAGGTAGAGCTTCCTCAGCCTTCTGGGCTGAATTTGTCGCAAGCTTTATCGTCATGTTCGTTGCTACA…
TtSIP1;1	CCCCTTCAATTCAGCAAACCACTGTAAACCCAGGAGGGAGGGAGAGAGAGAGAGGAGAGAGAAATTGAAGGTTTATCAGCCATGGCAGCAGGAACAATAGATTCAATAAAACTAGCAATAGGTGATGGAATATTAACATTCATGTGGGTATTTTGTGCTTCAACAATTGGTCTTTTCACCTACTTAATCTCAACTTGGTTTGCAATTCAAGGCCCTTTGACACTTGTTATTACAACTTCAATTGTAGCCACCCTTGTTTTTATGTTCACCTTCATTGGTCAAATCCTTGGTGGTGCTAGCTTTAACCCCACTGGCACTGCTGCCTTTTATGCCGCTGGTCTTGGCCGTGATTCTCTTCTCTCCATGGCACTCCGGTTCCCTGCTCAGGCTGCCGGTGCT…
TtSIP1;2	CATCACGTTCATGTACAAACACTAACCAATGCAAAATACTCGTACAATTTTAGAGGTAGGTGAGTCACATACACACTCATCTCCTTCAAAGTAGTTCCCATTCAAGATCCCATTCTCAAATTCCTCCTCTCCCCGTCAATTCATCAAACCACTGTAAACCCAGGAGAGAGAGAGGAGAGAGAAATTGAAGGTCCATCAGCCATGGCAGCAGGAACAATGGATTCAATAAAACTAGCAATAGGTGATGGAATATTAACATTCATGTGGGTATTTTGCGCTTCAACAATTGGTCTTTTCACCTATTTAATCTCAACTTGGTTTGCAATTCAAGGCCCTTTGACACTTGTCATTACAACTTCAATTGTGGCCACTCTTGTTTTTATATTCACCTGCATTGGT…
TtSIP2;1	ATTTGCAGTTTTGCACCATAAAATATAAAAATCAAATCACACCCAGACAAAGATTAAAAATTTGGACCAAACACAAAACGAATAATAAGATTCTCTCTCGTTTCCCCCAAAGCAGAAAATTGAGATTAATCATGTCCTAAAATTCGACACAAAAAACACACAGAGATTAGAGATATCGAAGACATTCATCAACAAAAATGGGGGCAATTGGGTTGCTACTTTCGGATTGTATCTTATCATTTATGTGGGTGTGGTCTGGAATGTTGGTTAGGATTCTTGTCTTCAACATTCTAGGGTTTGCTCATGATTTTACTGGTGAAATGGTAAAGCTGGGTTTCTCTCTTCTCAATCTGTTCTTCTTTGCCCTTATGCTCAAATTTTCCAAAGGTGGGGCCTACA…
TtSIP2;2	ACCATTTGCAGTTTTGCACCATAAAATATAAATCAAATCACACGCAGACAAAGATTAAAAATTTTGACCAAACACAAAACGAATAATAAGATTCTCTCTCGTTTCCCTCAAAGCAGTAAATTGAAATTAATCATGTCCTAAAACTCGACACAAAAACACACAGAGATAGAGATAATAGAGAAGACATTCATCAACAAAAATGGGCGCAATTGGGTTGCTACTTTCGGATTTCATCCTATCATTTATGTGGGTATGGTCTGGAATGTTGGTTAGAATTCTTGTCTTCAACGTTCTAGGGTTTGCTCATGATTTTACGGGTGAAATGGTAAAGCTGGGTTTCTCTCTTCTTAATCTGTTCTTCTTTGCCCTTATGCTCAAATTTTCCAAAGGTGGGGCCTA…
TtXIP1;1	CCTTAAGAAAGTGGGACATATAAGGATATAACAATGCCCCTATATATATATAGACATATTGTGTATTGGTGTATTGAAGAATTGTAAAGCTACAACGTTTTTTTTTTTTTTTTTTGTAGCTCTGATTTTAATAGTTATGGGTGAAGGTATTTTAGTGTTTAGAGATTTCGAAAATCAAAATCAGCTGGATGGAGCAGAAATAGCTAGAATTCTTCCGATTTCGGCCACTCCCATACGAAAGGCTTTGAGCACTTTGTAATACTCTCTCCGTTCAGATAAACGTTTACATTGTTGTTTTTGCACTTTGCATCATTTTTCATGCTCTTTTACTCGATTTTTTCTTTTTAATTTTGTGTTGTTCATCTATAAATAATATTTTTTTTTGTTCCGCCCCTTTCT…
TtXIP1;2	GAAGAATTTTAAAGGTACAACAGGTTTTTTTTTGTGGTAGCTCTAATTTTAATTAATTATGGGTGAAGGTATTTTAGTGTTTAGAGATTTCGAAAATCAAAATCAGCTGGATGGAGCAGCCATAGCTAGAATTCTTCCGATTTCAGCCACTCCCATACGGAAGGCTTTGAGCACTTTGTCTGTCTCAGGGAACATTGAGGACAAGAAGGTTGGATTGTTTGATGAACTTCTTCATCGGCTAGGCTTTGAAGAACTTTTCTCATTGCAGGTGTGGCGAGCATCCATGGCAGAATTACTAGGCACCGCGCTCCTAGTATTTATGGTAGATATGGTTGTCATCTCCTCCTTTGAGACAAGCACCAAGACTCCAAACATTGTAATGTCTTGCTTTGTTGCATT…

## Sheet: TtAQPs-Genes
TtPIP1;1	ATCAAACCCACCACAGTCTCACACACCACACTTTCACAACAGTGAGAGCTTCTAGCCAGAGAGAGAAAAACAAGCTAACAATGGAGGGTAAGGAAGAGGATGTTAGACTAGGAGCCAACAAGTACTCAGAGAGGCAACCACTGGGTACAGTGGCTCAGGACAGAGACTACAGAGAGCCACCGGCTGCACCGTTCTTTGAGGCCGGTGAGCTGACGTCATGGTCCTTTTACCGTGCTGGAATTGCTGAGTTCATAGCCACCTTTTTGTTCCTTTACATCTCAATTTTGACTGTTATGGGAGTTAACAGGTCACCTTCAAAGTGTGGTACTGTTGGTATTCAGGGTATTGCCTGGGCTTTTGGTGGCATGATCTTTGCTCTTGTTTACTGTACTGCTGGAA…
TtPIP1;2	AAACCACCACAGTCTCACACACCATACTTTCAGAACAGTGAGAGCTTCTAGCCAGAGAGAGAAAAACAAGAGAGAGAAACAAGCCCAACAATGGAGGGTAAGGAAGAGGATGTTAGACTAGGAGCCAACAAGTTCTCAGAGAGGCAACCACTGGGTACAGTGGCTCAGGACAGAGACTACAGAGAGCCACCGGCTGCACCGTTCTTTGAGGCCGGTGAGCTGACTTCATGGTCCTTTTACCGTGCTGGAATTGCTGAGTTCATAGCCACCTTTTTGTTCCTCTACATCTCAATTTTGACTGTTATGGGAGTTAACAGGTCACCTACAAAGTGTGGTACTGTTGGTATTCAGGGTATTGCTTGGGCTTTTGGTGGCATGATCTTTGCCCTTGTTTACTGT…
TtPIP1;3	CCTCACCAAAACTGGGTTCACCTTTCTATAAAAGGATCCTATAACTCTAACCCAGTGCCACAATTAATCCCATTCCTTCAAAAACCTAGAGAGAGAAAGCTCAAAACAAATCTAGAGAGAGAAAGCTCAAAAACCAAAAAAAATGGAGGGGAAAGAAGAGGATGTGAAGTTGGGAGCTAACAAGTACTCAGAGAGACAACCATTGGGAACATCAGCACAGTCAAAGGACTACAAAGAGCCACCACCAGCACCCTTTTTTGAGCCTGGGGAGCTAACTTCATGGTCATTTTATAGGGCTGGAATTGCTGAGTTTATTGCCACTTTCTTGTTCCTTTACATTACTGTTTTGACTGTCATGGGTGTTAACCGCTCTCCTAGCAAGTGTGCCTCTGTTGGTAT…
TtPIP1;4	TATAAAAGGGTCCTCTGACTCTAACCCATTACCACAATTAGAATTAATCCCATTCCTTGAAAAACCTAGAGAGAGAAAGCTCAAAACAAATCTAGAGAGAGAAAGCTCAAAAAAAAAATGGAGGGGAAAGAAGAGGATGTAAAGTTGGGAGCTAACAAGTACTCAGAGAGGCAGCCATTAGGAACATCAGCACAGTCAAAGGACTACAAAGAGCCACCACCAGCACCCTTTTTTGAGCCTGGGGAGTTAACTTCATGGTCATTTTACAGGGCTGGAATTGCTGAGTTTATTGCCACTTTCTTGTTCCTTTACATTACTGTTTTGACTGTCATGGGTGTTAACCGCTCTCCTAGCAAGTGTGCTTCTGTTGGTATTCAGGGTATTGCTTGGGCTTTTGGG…
TtPIP2;1	CCCATCCACACCACTCAACAAAAACCATCCACTTCACTCTTAAGTAGCTAAAGAGCAAACAAGCTAAACAGCAATTCAACAAGAGGGAATTTTGAGGAGAGAGAAAGATGGGAAAGGATTTTGAGGCAGGAGAGGCAAGAGACATATCAAAGGACTACCAAGACCCACCACCATCACCTCTTTTCGACACCGAAGAGCTGACAAAATGGTCGTTCTATAGGGCTGTGATTGCTGAGTTTGTTGCAACTTTGTTGTTTTTGTACATCACTGTGTTGACTGTGATTGGGTACAAGAGTCAGTCTGATCCTATCAATGGACCTGATGCTGGTTGTGGTGGTGTTGGTATCCTTGGAATTGCTTGGGCTTTTGGTGGCATGATTTTCATCCTTGTTTACTGCA…
TtPIP2;2	AAACAAAAACCATCCACTTCACTCTCTTAAGTAAGCTAAAGAGCAAACAAGCTAAACATACAGCATTTCAAGAAGAGGGAATTTTGAGGAGAGACAAAGATGGGGAAGGATTTTGAGGCAGGAGGAGAGGCAAGAGACATAACAAAGGACTACCAAGACCCACCACCATCACCTCTTTTCGACACCGAAGAGCTGACAAAATGGTCGTTCTATAGGGCTGTGATTGCTGAGTTTGTTGCAACTTTGTTGTTTTTGTACATCACTGTTTTGACTGTCATTGGGTACAAGAGCCAGTCTGATCCTATCAATGGACCTGATGCTGGTTGTGGTGGTGTTGGTATCCTTGGGATTGCTTGGGCTTTTGGTGGCATGATTTTCATCCTTGTTTACTGCACCGCC…
TtPIP2;3	CACTCACAAAATCCATCCAAAAACAACCATCCGTCTCTGCTCACTCTCTCTCTCTCTCAAATTCCTTTCTCTTTCCAAAAAATGACAAAGGACATGGGAGCACCAACAGAGCAAGGCTCATTCTCAGCAAAAGACTACCATGACCCTCCCCCAGCACCTTTAATAGACCCAGGGGAGTTCGGCAAATGGTCATTTTACAGGGCTATCATTGCTGAGTTTGTAGCCACTTTGCTGTTTCTTTACATCACTGTTCTCACTGTGATTGGTTACAAGAGCCAAACTGACCCTGCTATGAACGCTGATGAGTGTGGTGGTGTTGGTATTTTGGGTATTGCTTGGGCCTTTGGTGGCATGATTTTCATCCTTGTTTATTGCACTGCCGGAATTTCTGGTTAGCAA…
TtPIP2;4	CAAATAACCCTCAATTTAAAACATTATACACAACAAAAAAAATTAAAATAAAAAATCAAACAAACCCCAACTCCATCCTTCGTCCTTCTTTTTCCTCTCCTCTCTCCTCCAATTCCCCATACCTCCACAACTACCTAAAAGAACAGCAAATTGCAATAAGACAAAAAATCAAGATCAAAACTACATCAAACATTCATCTGCAAACATTCATCCGCAAAGTGTAAAAATTAAAATTGCACCTGGGTTATTTATATTTATTCAGATCCCTATCATCTCCACCCACACCAAATTCTCTCTCCTCCCCAAATCCCCAATTCTCTGCAAATACCCACTATTCAAAAACTTATACCCAATTTCTTCATCTACCATAACCCATATCTCTCTTTCTCTCTCCTTTTT…
TtPIP2;5	ACCTTATTATCACTTCTCTACTCTACTCCAACACAACCCATTTTCTCTCTCCTAAATCACTCAACATGACCAAGGACGTGGAGGTAGCTGATCAGCAAGCTCCTGAGTTCTCAGCAAAAGACTACCATGACCCTCCACCAGCCCCTTTGATTGACATGGATGAGCTGAAAAAATGGTCATTTTACAGGGCTGTTATAGCTGAGTTTGTAGCAACTCTACTTTTCCTCTATATTACTGTCTTAACGGTTATTGGGTATAAGAGCCAGACTGATCCCGCCACCAACGCAGACCAGTGTGGTGGCGTTGGTATCCTCGGTATCGCTTGGGCCTTTGGTGGCATGATCTTCATCCTTGTTTACTGCACCGCCGGTATCTCCGGTATGTTTATTAGTGATCAGC…
TtPIP2;6	CACCTTATCACTTCTCTACTCTACTAATACAATACAACCCATTTTCTCTCTCCTAAATCACTCACCATGACTAAGGACGTGGAGGTAGCTGATCAGCAAGCTCCTGAGTTCTCAGCAAAAGACTATCATGACCCTCCACCAGCCCCTTTGATTGACATGGATGAGCTGAAAAAATGGTCATTTTATAGGGCTGTCATAGCTGAGTTTGTAGCTACTCTACTTTTCCTCTATATTACTGTCTTAACGGTGATTGGATACAAGAGTCAGACCGATCCCGCCACCAACGCCGACCAGTGTGGTGGCGTTGGCATCCTCGGTATCGCTTGGGCCTTTGGTGGCATGATCTTCATCCTTGTTTACTGCACCGCTGGTATCTCCGGTAAGTTTATTAGTGATCAG…
TtPIP2;7	AGTGTCAAATTAGAGCTCACTAGAAAAACACCCAACCCTAGAGAGAGAAAGAAGAAAGAAAGAGAGAGAAAAGATGTCAAAGGAAGTGAGTGAGGAGGGACAAGGGCTTGGACACCAGCATGGCAAGGACTACGTTGATCCACCACCAGCACCTTTGTTTGACATGGGTGAGCTCAAGCTCTGGTCTTTCTACAGGGCCTTAATTGCTGAGTTCGTAGCTACTCTTTTGTTCCTCTATGTCACTGTTGCTACTGTCATTGGCCACAAGAAACAAACTGGCCCTTGTGATGGTGTTGGTCTTCTTGGTATTGCTTGGGCTTTTGGTGGCATGATTTTCATCCTTGTTTACTGCACCGCCGGTATCTCTGGTCAGTTCTCTCTCTCTCTCTCTTTCTCTCT…
TtPIP2;8	CAAAATAATACCCTAAGCTTATCCGTAACTCCCCCAAAATTCTAGCACCATCTGCCACTACCAATCCTCTTTATAAAGAAACCTCCACTACTCACAAACCTCAGTGTCAAATTAGAGCTCACTAGAAAAACACCCCCAACCCTAGAGAGAGAAAGAAGAAAGCTAAGAGAGAGAAAAGATGTCAAAGGAAGTGAGTGAGGAGGGACAAGGGCTGGGACACCAGCATGGCAAGGACTACGTTGATCCACCACCAGCACCATTGTTTGACATGGGTGAGCTCAAGCTCTGGTCTTTCTACAGGGCCTTAATTGCTGAGTTCGTAGCTACTCTTTTGTTCCTCTATGTCACTGTTGCTACTGTCATTGGCCACAAGAAACAAACTGGCCCTTGTGATGGTGT…
TtPIP2;9	AAATATCCATATATACACCACTCACCCCCCAAAAAACATATAACTTCATTCACTCTCTCTAAGAAGCTAATAAGTTGAATCGAACAAGAGAGAGAAAAATGGGAGATCAGGAGGACATGGAGGAGTATGTAGCACCAGGACAGCTACCGAAGAACTACCACGACCCACCGCCGTCGCCGTTTTTCAACATTGAGGAGCTGACAAAGTGGTCGTTTTATAGGGCATTGATAGCTGAGTTCGTTGCTACTATGTTGTTCTTGTACATCGCTGTCTTGACTGTCATTGGCTACAAGAGCCAGTCCGACACCACCGTCGTCGCCAACGGACCCAATGCTGGGTGTGGTGGCGTAGGCATCCTTGGGATTGCTTGGTCATTTGGTGGCATGATCTTTGTTCTTG…
TtPIP2;10	ATATAACTTCGTTCACTCTCTCTAGCTAGCTAAGAAGCTAAGCACCACTTGAATCGAACAAGAGAGAGAAAAATGGGAGATCAGGAGGACATGGAGGAGGAGTACGTAGCACCAGGACAGCTACCGAAGAACTACCACGACCCACCGCCGTCGCCGTTTTTCAACCTTGAGGAGCTGGCAAAGTGGTCGTTTTATAGGGCATTGATAGCTGAGTTCGTTGCTACTATGTTGTTCTTGTACATTGCTGTCTTGACTGTGATTGGCTACAAGAGCCAGTCCGACACCACCGTCGTCGCTAACGGACCTAATGCTGGGTGTGGTGGTGTAGGTATCCTTGGGATTGCTTGGTCCTTTGGTGGCATGATCTTTGTTCTTGTTTACTGCACGGCTGGTATCTCA…
TtPIP2;11	ATGGCAAAGTTGAAGATCAAGCAGGGTGCGGTGAAGGTGTTGGAGCCATGGATTGAGGCTTTGCCAGACCGTATCGTTGTTTATTACCCACTCAAATCTTCTTTCAAAACTCCAAAGCTCGAAACAATTGAGGAGGAGAGGGATGAACAACGAGATGACGAACGTCATGCATGTAACTACAGGCAATACATTTCGTCGAGGTTGGATGCTTTGAAGACCTGAAATATTGATTCAAATACATGCAACTATACAAAATATGTAATTAGTAGTGTTTAATTAGTGTATTGACAACAAGTCTAATTTGCTGCCTTCTTGTTGTACTGTATCTAAAAATATCGAAAGCAATATTGATTTATGTGGTGTTTGTCCTAACTTCTTGGGACTTTCTACTGTTTCCCT…
TtTIP1;1	GGAGATCAGAAATAGAGAGAGAAAACCCCTTTCATTTCCATTATCACAATTAATTAATTATCTCTCTTAATTAATTACACAAACAAAAATGCCTATCAGAGAGATTAGTGTTGGAAGGCCTGAAGAGGCATACCACCCAAACACCCTAAAGCAGGGTTTAGCTGAGTTTATCTCAACTGTTATCTTTGTCTTCGCCGGCGAGGGTTCCGGCATGGCTTTCGCTAAGTTAACCGAAGGCGCTGCCGGAACCCCCGCCGGCCTTGTAGCCGCTGCTATTGCACATGCTTTTGCGCTTTTCGTAGCGGTTTCCGTTGCCGCTAATGTCTCTGGTGGACATGTTAACCCTGCTGTCACTTTTGGTGCCTTTGTTGGTGGTAACATTTCTCTCCTACGTGGGAT…
TtTIP1;2	ACTCCCTTCACCCCCCAGACCCCTCCCTTCTCCCCCCATTATAAAGTACGTGTTCCCCATTGTGAAGTGGAGATCAGAAACCCCTTTCATTTCCATAATCACAATCTTAATCTCTCTTAATTAATTAGTTAATTATTATTATTATACAAACAAAATGCCTATCAGAGAGATTAGTGTTGGAAGGCCTGAAGAGGCATACCACCCAAACACCCTAAAACAGGGTTTGGCTGAGTTTATCTCAACTGCTATCTTTGTCTTTGCCGGCGAGGGTTCCGGCATGGCGTTCGCTAAGTTAACCGAAGGCGCTGCTGGAACCCCCGCCGGCCTTGTAGCCGCTGCTATTGCACATGCCTTTGCGCTTTTCGTAGCGGTTTCCGTTGCCGCTAATGTCTCTGGTGG…
TtTIP1;3	ATCAAAGATAGCTAAGAAGAGCAAGTTAAGGTCTCTTTGCATATATAGCAAGAGCAACTTAGAGGTCGATAGCAACGAATTTCACTAGCATCTTGAGAATGGCGATCCCAAGACTCGCTCTCGGGTCTCCAGCTGAGGCTAGCCACCCCGGTGCCCTCAAAGCTGCATTGGCTGAGTTCATTTCCATGCTCATTTTTGTCTTTGCTGGAGAAGGCTCTGGCATGGCATTCAGTAAGTTCACATACAAGTCCATTTTTCCATAAGCTAAGAACTTATTGATTATCATAGCTAAGACTAAGCATCAAAGGGATGCGCTCTTCCTACCAAGAGGAAGGGTGAAAAAAACACTCCACGTATCATGTGCTTATCACATGAATGTCTGCAATCACATAAAATTAT…
TtTIP1;4	ATCAAAGATAGCTAAGAAGAGCAAGCCTAGGTCTCTTTGCATACATAGCAAGAGCAACTTAGAGGTCGATAGCAAACCAACATCTTGAGAATGGCGATCCCAAGACTCGCTCTCGGGTCTCCAGCTGAGGCTAGCCACCCCGGTGCCCTCAAAGCTGGATTGGCTGAGTTCATCTCCATGCTCATCTTTGTCTTTGCTGGGGAAGGCTCTGGCATGGCATTCAGTAAGTTCACATACATGTCCATTTTTCCATAAGCTAGGAACTTATTGATTGTGAAAAAACACTCCACGTATCATGTGCTTATCACATGAATGTCCGCGATCACATAATCTTATGCATACTACCTTACAATATCTCATTTTCTGATGAATTTGGTATTTCTCTGGGTGGCAGGCAAG…
TtTIP1;5	ATGAATTTGGGGATTGCAGGCAAACTGACAGACAATGGTGCAGCAACACCAACAGGGCTAATAGCAGCAGCATTGACCCATGCATTTGCACTAATTGTGGCAGTTTCAGTTGGTGCCAACATTTCAGGGGGTCATGTTAACCCTGCTGTTACCTTTGGTGCCTTTGTGGGAGGTCACATTACCTTGTTGCGTGCCATCTTGTATTGGATTGGTCAATTGTTTGGATCCGTTGTTGCTTGCTTGCTTCTCAAATTCGCTACCGGAATGGTAACTAACCTACCTTAATTACTTTTCCTGCCATTTCATCGCTTTAATGTTACTTCGCTATCCTAAAAAGTTTCACGCCTTATAAAAAAAGAATAACGCTTTCTCTGAGCGCCCTCATGAACCCTTATTAAA…
TtTIP1;6	ATGCCAATATATAGAATAGCAGTGGGTAATCCAGGGGAGGCAAGCCATCCAGATGCCTTGAGAGCGGCGCTCGCGGAGTTCTTCTCCATGATCATCTTCGTCTTCGCCGGACAAGGATCCGGCATGGCCTTTAGTAAGTACAATTATATATTGTGTGTACTCATATTGGTTATGACTTATGTGCATATAATGTTTTATTTCTTGGGTTCACATACATTTGATTTATGAGTACGTGATTGTTTTGTTATTGTTATATATAGCTAGCTAGTATACTTAGAATAAATTACAATCTGTCCTGGTAAATGTTATCAAGTAACAAGAGAAATCTTCGTTCATAAAAAGCCATACGGTATTTACAAAGACGAATTTTTCTAAACAAGTACAAATTTAAAATAATAA…
TtTIP2;1	GTGGTATCTGAAAGCCAAACTCACTATTTGTGTCTCAAAACCTCTTTTCTTTCCATTTCTTATCTTAATTTAGTAGGCAAGAGAGAGAGAGAGAGAGAGAGTAATGGCAGGACTTGCCTTTGGGAGATTTGATGACTCTTTCAGTTGGGCCTCAATTAAGGCTTACATAGCTGAATTCATCTCTACATTGCTCTTTGTCTTTGCTGGTGTAGGCTCTTGCATTGCTTTCAGTCAGTACCTAATACCTTCATATTATCACTTACTAACTCTTTTCTTTCTTTGATTTGAACTAGTACATACTGTGATGTTCAATTTTCATATGAACACTTTGTTTTTCTAGTATTTTCAAGGTTGAACAAAAGAGCTCACTAAAATTTTCTAGCTAATAAGCTTTAAATC…
TtTIP2;2	CATGGTTGCTATATATAGATGTGATGTGGAAAGGCCCCTTTGTGTTATCTGAAAGCCAAACTCACTATTTGTGTCTCAAAACCTCTTTTCTTTCCCTTTTTTCTTATCTTTAATTAGTAGCAAGAGAGACATAGCCATGGCAGGGCTTGCCTTTGGGAGATTTGATGACTCTTTCAGTTGGGCCTCAATTAAGGCTTACATTGCTGAATTCATCTCCACATTGCTCTTTGTCTTTGCTGGTGTTGGCTCTTGCATTGCTTTCAGTCAGTACCTACCTTCATATCACTTACTAACTCTTTTCTTTCTTTAATTTTGAACTAGTACATATATACTGTGATGTTCATTTTTCATATGGAGACTTTGTTTTTCTAGTATTTTCAAGGTTGAACAAAAGAGCTC…
TtTIP2;3	ATGGTGAAGTTGACTTTTGGTAGCTTTGGGGACTCTTTCAGTGTTGCATCACTCAAGGCTTATTTGTCTGAATTCATTGCAACTCTCCTCTTTGTGTTTGCAGGAGTAGGTTCTGCAATAGCTTTCAGTAAGTACTCTATCTCTTACTACTTCAACTTTGTATTTTTGGTTTCTTTGTACTCGAGATGGTTGATCCGTTGATAAGAGTTGACTTTACTAGAAAACACCTATCGTGAATTAATTCATGAAATACCCGAGACAATGGTTTTGGAAATGACCCTTAAGCCTTTAGTTGTGGCTGCTATTTTTACTTAAATTTCAAATATGGGTTTTGATACAGGCAAATTGACAAGTGATGGAGCATTGGACCCAGCAGGGCTAGTTGCAGTAGCTGTGGCT…
TtTIP2;4	ATGGTGAAGTTGACTTTTGGTAGTTTTGGTGACTCTTTCAGTGTTGGATCACTCAAGGCTTATTTGTCTGAATTCATTGCAACTCTCCTCTTTGTATTTGCAGGAGTAGGTTCTGCAATTGCTTTCAGTAAGTATCTCTTACTACTTCAACTTCGTATTTTTTTGGTTTCTTCTTACAATCGTACTTGTAACGATAAGTTAGTTGATCCGCTGATAAATAAGCAATTACTCTATTAATTATAAAATCGCGCAAGGAATTGACTTTATAAGTGAACACAAACGTGAATCAATTCATGAAATACCCGAAACATTAATTTCGGAGATGCCCTTCAAGCCCTTAGCTATGGCTGCTATTATAATTCAAAGTTAAAACCATATATTAGCATTTTTTACTTAATT…
TtTIP2;5	GCCACCTAGAACATAACTTTGAATTAACTAAAACCATTGAATAGCTAAGTTTTGAGTTTAATAAAAATGGTGAAGTTGGATTTTGGTAGCATTGGTGACTCTTTTAGCGTTAGTTCACTCAAGGCTTACTTAGCTGAATTTATTGCCACCCTCCTTTTTGTATTTGCAGGAGTGGGTTCTGCAATTGCTTTCAGTAAGTAGAGTATTACACTATTACTCTACTACTTAATTTCAACTTGTACTCACCCTATTTGTTATTTTTGCGTAATTATGAGTGGTTTGGAGAGCGATAATCCTAACCACTAGAGCATCTCATGATTCCTAATCGCGACAATGACTTTATTTATGCGCGTGCAGGCAAGCTCACGAGTGATGGAGCACTAGACCCAGCAGGGCTAG…
TtTIP2;6	AGAACTTTGAGTTAACTAATTAAACCATTCCCCTAATCAATATTTTTGAGATTAATCAACATGGTGAAGTTGTGTTTTGGTAGCATTGGTGACTCTTTTAGCGTTAGTTCACTCAAGGCCTACTTAGCTGAATTTATTGCCACTCTCCTTTTTGTTTTTGCAGGAGTGGGTTCTGCAATAGCTTTCAGTAAGTAGAGTATTACGAGTACTTAATTTCAACTTGTTACTCATCCTATTTGTTTTTGTGTAATTATGAGTGGTTTCGAGAGCGATACTCTAACCACCGGAGCATCTCTTGATTTCTAATCGCGACTATGGCTTTATTTATGCGCGTGCAGGCAAGGTAACAAGTGATGGAGCACTAGACCCGGCAGGGCTAGTTGCAGTGGCTCTAGCTCA…
TtTIP3;1	CCTCTCTCTCCATTCTCCATTATTACTTCCTTTCTCATCTTACACACACTCTCTCTCTTTGATCACCACTTTGACACGGTGTGAAGTGCATGCAACAAACAAATCAGACCACAAAGCTGATTTTGGTACAGCCCAACATAACCAGCTAAGTGTAACCATATTATCAAAGAACAACAAGGTTTTGGTGGTATTTTCTGAGTTTTGGTGTCAATTCTTTGCAAGGATATATTTCATAACTTGGCTTGGCTAGTGAGGATCTCAAGAAAGCTAAGGGACGATGGCACCGCCTCGTAGATACGCGTTCGGAAGGCCGGAAGAGGCCACACACCCAGACTCCATTAGAGCCACTTTGGCTGAATTCATCTCAACTTTTATTTTCGTCTTTGCTGGCGAAGGCTC…
TtTIP3;2	CTTCCTTTCTCACCTACACACTCTCTCTCTCTCTTTGATCACCACTTTGACACGGTGTGAAGTGCATGCAACAAACAAAGCAGACCACAAAGCTGATTTTGGTACAGCCCAACATAATAACCAGCTAAGTGTAACCATATTATCAAAGAACAAGGTTTTGGTGGTATTTTCTGAGTTTTGGTGTCAATTTTTTGCAAGGATATATTTCATAACTTGGCTTAGCTAGTGAGGATCTCAAGAAAGCTAAGGGACGATGGCACCGCCTCGTAGATACGCGTTCGGAAGGCCGGAAGAGGCCACACACCCAGACTCCATTAGAGCCACCTTGGCTGAATTCATCTCAACTTTTATTTTCGTCTTCGCTGGCGAAGGCTCTCTCCTCGCTCTTCGTATGTTTAA…
TtTIP4;1	ATGGCGAAGATAGCGCTAGGAACAAGCCGTGAGGCAATGCAACCAGATTGCATCAAAGCCCTGGCTGTTGAATTCATTTGCACTTTCCTTTTCGTATTCGCCGGTGTCGGATCTGCCATGGCCGCCGGTATATAACCTTAATCTCCTGTTCTTTATGCTCTATATGCTAGTTATTCAAAAGAAAATTTCAAGTTTCTTTTGTTAAAATATACTTGACCATGTTGTGTATATTTTAGAAAAATGACTATGCGAAGTATGTACATAAAGTTGACTTTTCTCATATAAAATACGAGTACTAGTAGAGTGTTTAATAAATTAAACAAATTAAAAGATATAACAAGTTCAAGAGGTTATTTGTCAAGCTACAAATAAGTAAACAAAGTTACTTATGATCATGAT…
TtTIP4;2	AACAAACTCCAGCATAAGTAGTCATTCCAAAGTTGCTCATTAGCAGATACAAGACCAAAAGGATCATATGGCGAAAATAGCGTTAGGAACAAGCCGTGAGGCAATGCAAGTAGATTGCATCAAAGCCCTGGTTGTTGAATTCATTTGCACTTTCCTTTTCGTCTTCGCCGGTGTCGGATCTGCCATGGCCGCCGGTATATATAGCCTAAATCTCCTCTTCTTTTTCCTCTATATGCTAGTTTTTCATAAGAAAATTCAAGATTTTTTTGTTAAAATACTTGACCATGTTGTATATTTATTTAGAAAATTGACTATAAAGTACACAAAGTTGACTTTTCTCATGAAAATTTTTGTAGTGTTTAATAAATTAAACAAATAAAAAGATAAAGCAAGTTCAAG…
TtTIP5;1	ATGGCACCAAGAACAACATTTAGCGCCCATTTCAAGCAATCAGTAACCCCAAATTCTCTGAGATCATACCTTGCTGAATTTATCTCCACCTTCATCTATGTCTTGGCTGCCGCCGGATCCGTCATGGCATCAAGTAAGTTTTCTTTTACAAAATCTTAAAAATATTTTGACCTTATTAATTTTGTTTGCATCTAAGCAGATTTTCCTCTCTTTTTTCCCCTAGTGTTATTTATGATTACTTTATGTGCACAACAGTAAAAATTCATAGATGTTGAGTATTTCAGTTGCTCATAATGTACGGTACAAAGTTGCATTGTTAATTACTCTATGATTTAGCGAGTTAGTTTTTTCATTTTGATCTACTAACGTCCAGTAATAACACACAATTTTGTGGTGTTA…
TtTIP5;2	ATGGCACCAAGAACAACATTTAGCGCCCATTTTAAGCAATCAGTAACCCCAAATTCTGTGAGATCATACCTTGCTGAATTTATCTCCACATTCATCTATGTCTTGGCTGCCGCCGGATCCGTCATGGCATCTAGTAAGTTTTCTTTGCCAAAGTTCTGAAAATTCCTGTCCTCATTAATTTTATTTACATCTAAGTTTTTTTATCTGTTTCCCTTTGTGTTGTTGGTTTTTTTTTTTTAAGGGTCCCTTTGTGTTGTTTATGTTTACTATATGTGCATAACAGCATAAATTCATAAATGTTGAGTATTTCAGTTTCTCATACCTTACGATACAAATTAAATTATGATTTGGTGAGGGGTTTTTTCATTTTGATTACTACTGTCTTGCCACACGTAAATT…
TtNIP1;1	GGACTTTGTACCCCCTTTGGTATTGGAGTTATAAAACCTTACCCACCTTGGCTCATATTTTTATCTTTGTACTTCTTTGTGTCATAACTCATAAGACTCAAAGGTCATCTATCCTTCCTTAATTAGTCTTAAGATGGGTGAAATTGCAAGAGCTAATGGCAACCATGAAGTCACCTTGAATGTCAAGGATGGTGCTGAAACTCTCCCTCAAAACACTACTACCAATAATTCCTCTGCTTCTAACTTCAATGACAACCGCTCTGGTTCTAGCTGCATCAGTATCCCCTTTCTGCAAAAGGTAAAAACTACCCCTCCACCTCCAATTCTCTCCCCTTTTCCTTTCCTTTTCGCTCTCGGATCATATCATACAGTCTTATAGTCATAATAACGGAGTATAGT…
TtNIP1;2	GAGTTATATAACCTTACCCACCTTGGCTCATATTTTTGCCCTTGTACTTCTTCTTTGTGTCATAACTCATAAGACTCAAAGGTCATCTATCCTTCCTTAATTAGTCTTAAAATGGGTGAAATTGCAAGAGCTAATGGCAACCATGAAGTCACCTTGAATGTCAAAGATGGAGCTGAAACTCTCCCTCAAAACCATGCTACCAGTAATTCTTCTGCTTCTAACTTCAATGACAACCGCTCTGCTGGTTCTAGCTGCATCAGTATCCCCTTTCTGCAAAAGGTAAAAACTACCCTCTCCTCCAATTCTCTCCCCATTTCCTTTCCTTTTCGCCATCGGATTATATTATTCATAAAACGGAGTATTACTTAAAATACTTAAAATTAACATGGTATCAGAGCC…
TtNIP2;1	ATGACACCGCCAACAAAGATCAATCATGTTGATGATGACCAGAGCCTGCGAAAACTTGAAGAAGGATGCGTCACCATATTGCGACAACCTCTGAAAACTTCTCTTGACCCATCTTCTTGTTCATCAACTGCTACACTAGTCATTTTGCAAAAGGTAAAAATATATATACAATCCCGTTAAACTCAATGTTGTGAGTACTAGAATTATATTCCCAATAGTACGTACTAGAATAATAATATTCCCTAACATCAGTGCCGGCTCTTAGCATGTGCATGTGGAGCACTTGCACAGGGCCTCAAGTTTTTTGGGGCCCTAAATTTTAAAGTGGGTCTGACCTAAAACACTTGAATTTGAAATTTTTGAATCTGAGTCGCCTTTTTCATTGGGTTATAGGAATTA…
TtNIP2;2	ATGACACCGCCAACAAAGATCAATCATGTTGATGATGACCAGAGCCTGCGAAAACTTGAAGAAGGATGCGTCACCATATTGCGACAACCTCTGAAAACTTCTCTTGACCCATCTTCTTGTTCATCAACTGCTACACTAGTCATTTTGCAAAAGGTAAAAATATATATACAATCCCGTTAAACTCAATGTTGTGAGTACTAGAATTATATTCCCAATAGTACGTACTAGAATAATAATATTCCCTAACATCAGTGCCGGCTCTTAGCATGTGCATGTGGAGCACTTGCACAGGGCCTCAAGTTTTTTGGGGCCCTAAATTTTAAAGTGGGTCTGACCTAAAACACTTGAATTTGAAATTTTTGAATCTGAGTCGCCTTTTTCATTGGGTTATAGGAATTA…
TtNIP2;3	ATGACACCGCCAACAAAGATCAATCATGTTGATGATGACCAGAGCCTGCGAAAACTTGAAGAAGGATGCGTCACCATATTGCGACAACCTCTGAAAACTTCTCTTGACCCATCTTCTTGTTCATCAACTGCTACACTAGTCATTTTGCAAAAGGTAAAAATATATATACAATCCCGTTAAACTCAATGTTGTGAGTACTAGAATTATATTCCCAATAGTACGTACTAGAATAATAATATTCCCTAACATCAGTGCCGGCTCTTAGCATGTGCATGTGGAGCACTTGCACAGGGCCTCAAGTTTTTTGGGGCCCTAAATTTTAAAGTGGGTCTGACCTAAAACACTTGAATTTGAAATTTTTGAATCTGAGTCGCCTTTTTCATTGGGTTATAGGAATTA…
TtNIP3;1	GGGGGCCCTTCACTACTACTTCATCTCTCTACCTTCTCATACATTTTGCTTTCCAGGGCACTTGGAGGTTGTATTTATCTTTAGCCAAAAAAAAAAAAGAAGAAGAAGAAAGAAACAATGGATACAAACTCACAAATTGCTCCATCTTCAAAGAAAGGACAAAATATATATCATGTCCTCATGACATCCTTTAATCAACATTACCCACCAGAATTTATTCGTCAGGTACGTCACACCATTTTTTTCTTCTTTAATTTCTTTTTTTCTCTTTTTGTTGCCATAACAACGTAAGTGATCAACTGTAGTAATGTTTAGTCTTTCTTTGTGCTTTTTCTCCTGTGATAATGTTAGAAAAACAAATTAAACAACTTAAAATTGATTAGGTGGGTAGTAGATCAC…
TtNIP4;1	ACTCCTCCTCCTCCTCCTCCTGTTAATTAGTGTGTGAAAGGGTAAGATTAGTTGGATGGATAAGGGAGTAGATCAAGTGAATATTGAGTACTTATCCTCATAATTTGGCAATTCCCCAAAAACAGCAGTTATTGCAGTTAGTTGTCTTGCCTTTTTTTAACACCTATCCCCCATCATCTTCTTTCCTTCAACTAAATCAAACATTATTTTGCTTGCTTACACATTTGCTCCCCATTCACTCCATAAACAGGGAAAAAATCAACATTATTTGTGTTTTTGTTCCATTAACAAGGATCTCATCCCTTTTTTTTTTTTTTTTTTTTACTAATTCATTATTGTTATTGTTGAAGAATTAGTTATTGGTATTTTGTGATCGAGTAATTAATTATGGGTACAAAT…
TtNIP4;2	AAAACAGCACTTATTACCAACTGATTCGCAGTTATATTTCCTTTTTTAACACCCATCCCCATCACCTTCTTTCCTTCAACTAAATCAAACATTTTTTTGCTTGTTACATATTTGCTCCCCGTTCACTCGCATAAACAGGGAAAAACATAATATTTGTGTTTTTGTTCCATTAAGAAGGATCTCATCCCTTTTTTGAATCGTTATTGTTATTGTTGGAAAATTACTTACTGGTATTTTGTGATCGAGTAATTAATTATGGGTACAAATACAAATACTGATGACATTCTTCAAGAAGAAGATTTGAAAAAGGTTGAAGAAGGCAATGGCAATGGCATTGGCACCTCATCAAAATTTGATTCCTTTTGTTCTTCTCCATCTGTCGTCTGCTTAACACAAAAG…
TtNIP5;1	CTCACTTGTTGCCAAAATAACCTTAATACAATATCACTCTCTCTCTTCTCATTCCTCATTTTTCTTCCAATCTCAATTCCCCTGTTTAGTTTTTGCTTGGTTCTGTTTTCAGTTTTTGATGCATTTTCATAGTTTGTTCATCAACTTCTTGTATTGATTTCGAACTTGCTTTGATCCGCTGGCTCTAATCACCACCATTATTACACCGTAAAAACACCACAAAAAAATCTTCCAAATTATGTAATCTCTGCCCAATCTTACTCTTTTGATCCCCAAAAAAACCCAAAAAAAATTCTATTCTTTGAAGATTCTGAACATTTTTATGCTTATGTCTATCTAGTTATTCTCTTCTCTTGGTTAGTTATAGTGGCTACAATTCAACCCAAACCTTAGCTTCAA…
TtNIP5;2	TTTTGGATTGATTTAAACTCATAGAAACGCTCACAAGCCCTCCAATCACATCACTCACTTGTTGCCAAAATAACCTTAATACAATATCACTTTCTCTTCTCTTCTCTCTCCTCATCACATTTCTTCATTTCCTTCTAATCTCAATTCCCCTGTTTAGTTTTTGCTTTCGATTTTTGATGCATTTTCATAGTTTGTTCATCAACTTCTTGTATTGATTTCCAACTTGCTTTGATCGTGGCTCTAATCACCACCATTACAACACCGTAAAAACACCTCAAAAAAAATCTTCCAAATTATGTAATCTAAGCCCAATCTTACTCTTTTGATCCCCAAAAAAAAAACCCAAAAAAATTCTATTCTTTGAAGATTCTAAACATTTTTATGCTTATGTCTGTCTAG…
TtNIP6;1	GGACTAAATCAGCAGCTTCAGTTCTGCAGAAATACAACTATACAAGTACTTTCTCACTCTCTTAACTTCTGTATTATGCAAAATATGGATGCTGAGGATACTGCTTCGATGCCTTCAACTCCAGTGACCCCCGGCACCCCTGGGGCTCCCCTCTTTGGGGGATTCAGGGGAGATAGACCCACGACAACCCCTAGGAAGTCCCTTCTCGGTAACTGCTTCACTGTCGAAACCTGGCCTAATGAAGAAGGGAGCTTGCCAGCCGTGACCTGCACTATGATGATGCCACCTCCCCCCGTCCCTGTTGCTAAGAAGGTACATTCTTCAGTTTCTGTTAGGTTCGACACAAAGTGCATCACCCCAAGGGAGATCCTTCCCTTGGGGGGAGATAGCAAGAAAAAA…
TtNIP6;2	GGACTAAATCAGCAGCTTCAGCACTGCAGAAATACAACTATACAAGTACCTTCTCTATCTCTTAACTTCAGTGTTACGCAAAATATGGATGCTGAGGATACAGCTTCAATGCCTTCAACCCCAGTGACCCCAGGCACCCCTGGGGCTCCCCTCTTTGGGGGATTCAGGGGAGATAGACCCACGACAACCCCTAGGAAGTCCATTCTCGGTAACTGCTTCACTGTCGAAACCTGGCCTAATGAAGAAGGGAGCTTGCCTGCTGTGACCTGCACCATGATGATGCCACCTCCCCCCGTCCCTGTTGCTAAGAAGGTACATTCTTAAGTTTCTGTTAGGATCCACACAAAGTGCATCACCCCTAGGGAGATCCTTCCCTTGGGGGGGATAGGAAGAAAAAAA…
TtNIP7;1	ATGGCGGGCAATTGTGATGAGATGTCACCGTCGACAGAAACACCAGCTACCGGCAATCGGTCGTTGACTAAACTATCTGCGTCGTCTAGGATGCTCAGCGTTACACTTCTTAAAAAGGTGATTAATTTTTGCACCAAAAAAAAAGTTGATTAATTCATATCTGTCTTTTCTTAAAATTTTCTTAATCCATAACATCGTTAGCTTTAATACTCCCTCCATTTCTGTCAAAAACTACCATTTTCTTTTTTTGGATGTTTCATACAAACACTTCTATTTCTATGTTTGGTAAAAAAAAATTGCTAGTCTTTTACAATATCACCCTCTTCTCAAAAAAAAAAATAAAAAATACAATATCACCCTTCACATTAAACCCCAACTAGCTGCTAGCCCCCACCAAGA…
TtNIP7;2	ATGGCGGGCAATTGTGATGAGATGTCACCGTCGACAGAAACACCAGCTACCGGCAATCGGTCGTTGACTAAACTATCTGCGTCGTCTAGGATGCTCAGCGTTACACTTCTTAAAAAGGTGATTAATTTTTGCACCAAAAAAAAAGTTGATTAATTCATATCTGTCTTTTCTTAAAATTTTCTTAACCCATAACATCGTTAGCTTTAATACTCCCTCCATTTCTGTCAAACACTACCATTTTCTTTTTTTGGATGTTTCATACAAACACTTCTATTTCTATGTTTGGTAAAAAAATTGCTAGTCTTTTACAATATCACCCTCTTCTCAAAAAAAAAAATAAAAAATACAATATCACCCTTCACATTAAACCCCAACTAGCCGCTAGCCCCCACCAAGAAA…
TtNIP7;3	ATGGCGGGCAATTGTGATGAGATGTCACCGGCGACAGAAACACCAGCTACCGGCAATCGGTCGTTGACTAAACTATCTGCGTCGTCTATGATGCTCAGCGTTACACTTCTTAAAAAGGTGATTTCTCTTTAAAATTTCTTAATCCATAATATCGTTAGCTTAATTATCTAGTTTAATGAGAAGCTAAATTACCTTCTCATTTTTCCTATTTAAATTTTTCCTATTTTTTTCAAATTTTGTGAGGTTGGGAGCGTTGGAGCATTTCTTTTTTCTTTGTTTGAGATGGGATTTGATTTCCTCAAATATATGAATACAAAAATTTGTATAAGACGGTGGTAAAGTAAATTTCACGGATACAGTAATCACTTTTTAGTGAAACAATGATCATTGTTCATAATA…
TtNIP8;1	ATGTTAGGAGAATCCTTAAGACCAAATGGGCAGTCCCAAAAAGAAGAATCAGCAAGTGGGCAATTGCAAAATAATCAACAACAGATGAGGGCTGCTCATGCTGAAAGTGTTCATGAACATGATGATATCGATCGATCATTTCCTCGAAACGAGATTCAAAAATTCGCCTTGGGATTCATTCCTAGAGGATGGTCATCATGGAATATAAATCCTGCTCGTCCTGTATGTATTATGACTATATAAAAATTTTAGACTAATAGATCACGACTCGAGGAAATGTATATTTGTACTACTAATGTTGTGTCTTGATCAATTGTTGCATTGTTTTCGTTTGCAGATGTTAGCAGAAATGCTAGGAACATTCATGTTGATATTCTGCATATGTGGGATACTAGGGAG…
TtNIP8;2	ATGTTAGGAGAATCCTTAAGACCAAATGGGCAGTCCCAAAAAGAAAAATCAACAAGTGGGCAATTGCAAAATAATCAACAACAGATGAGGGCTGCTCATGATGAAAGTGTTCATGAACATGATGATATCGATCGATCATTTCCTCGAAACGAGATTCAAAAATTCGCCTTGGGATTCATTCCTAGAGGATGGTCATCATGGAATATAAATCCTGCTCGTCCTGTATGTATTATGACTATATAAAAATTTTAGACTAATAGATCACGACTCGAGGAAATGTATATTTGTACTACTAATGTTGTGTCTTGATCAATTGTTGCATTGTTTTCGTTTGCAGATGTTAGCAGAAATGCTAGGAACATTCATGTTGATATTCTGCATATGTGGGATACTAGGGAG…
TtNIP8;3	ATGTTAGCAGAAATGCTAGGAACATTCATGTTGATATTCTGCATATGTGGGATATTAGGGAGTATGGAATTGGTAGGGAACCAAGTGGGTCTTATGGAGTATGCTACCACAGCTGGTGCTGCCATAATTGTGATTGTTTTCTCTCTAGGCCGGGTCTCCGGTGCTCATGTAAATCCTGCTGTCACAATAGCCTTTGCTGTATTTGGTCATTTTCCATGGTCCAAGGTACCTTGTTCTGTTTTCAGCTGTTTCTTTCTATGTTTTTTGGGTGGTGAAGAATAGAATTGCTCAAGTATATATTTGAATGGATTTTTCAATAGTGTGTTTGGTTTGGGTGGCGCATCCCCCACTAATCCCGAGCAATGACCTGGTAATTGGATCGAGTCTTATTTACCCTCA…
TtNIP8;4	ATGTTAGCAGAAATGCTAGGAACATTCATGTTGATATTCTGCATATGTGGGATATTAGGGAGTATGGAATTGGTAGGAAACCAAGTGGGTCTTATGGAGTATGCTACCACAGCTGGTGCTGCCATAATTGTGATTGTTTTCTCTCTAGGCTGGGTCTCCGGTGCTCATGTAAATCCTGCTGTCACAATAGCCTTTGCTGTATTTGGTCATTTTCCATGGTCCAAGGTACCTTGTTCTGTTTTCAGCTGTTTCTTTGTGTTTTTTGGGTGGTGAAGAATAGAATTGCTCAAGTATATATTTGAATGGATTTTTCAATAGTGCGTTTGGTTTGGGTGGCGCATCCCCCACTAATCCCGAGCAATGACCTGGTAATTGGATCAAATCTTATTTACCCTCAAA…
TtSIP1;1	CCCCTTCAATTCAGCAAACCACTGTAAACCCAGGAGGGAGGGAGAGAGAGAGAGGAGAGAGAAATTGAAGGTTTATCAGCCATGGCAGCAGGAACAATAGATTCAATAAAACTAGCAATAGGTGATGGAATATTAACATTCATGTGGGTATTTTGTGCTTCAACAATTGGTCTTTTCACCTACTTAATCTCAACTTGGTTTGCAATTCAAGGCCCTTTGACACTTGTTATTACAACTTCAATTGTAGCCACCCTTGTTTTTATGTTCACCTTCATTGGTCAAATCCTTGGTGGTGCTAGCTTTAACCCCACTGGCACTGCTGCCTTTTATGCCGCTGGTCTTGGCCGTGATTCTCTTCTCTCCATGGCACTCCGGTTCCCTGCTCAGGTCCCCTTATTA…
TtSIP1;2	CATCACGTTCATGTACAAACACTAACCAATGCAAAATACTCGTACAATTTTAGAGGTAGGTGAGTCACATACACACTCATCTCCTTCAAAGTAGTTCCCATTCAAGATCCCATTCTCAAATTCCTCCTCTCCCCGTCAATTCATCAAACCACTGTAAACCCAGGAGAGAGAGAGGAGAGAGAAATTGAAGGTCCATCAGCCATGGCAGCAGGAACAATGGATTCAATAAAACTAGCAATAGGTGATGGAATATTAACATTCATGTGGGTATTTTGCGCTTCAACAATTGGTCTTTTCACCTATTTAATCTCAACTTGGTTTGCAATTCAAGGCCCTTTGACACTTGTCATTACAACTTCAATTGTGGCCACTCTTGTTTTTATATTCACCTGCATTGGT…
TtSIP2;1	ATTTGCAGTTTTGCACCATAAAATATAAAAATCAAATCACACCCAGACAAAGATTAAAAATTTGGACCAAACACAAAACGAATAATAAGATTCTCTCTCGTTTCCCCCAAAGCAGAAAATTGAGATTAATCATGTCCTAAAATTCGACACAAAAAACACACAGAGATTAGAGATATCGAAGACATTCATCAACAAAAATGGGGGCAATTGGGTTGCTACTTTCGGATTGTATCTTATCATTTATGTGGGTGTGGTCTGGAATGTTGGTTAGGATTCTTGTCTTCAACATTCTAGGGTTTGCTCATGATTTTACTGGTGAAATGGTAAAGCTGGGTTTCTCTCTTCTCAATCTGTTCTTCTTTGCCCTTATGCTCAAATTTTCCAAAGGTGGGGCCTACA…
TtSIP2;2	ACCATTTGCAGTTTTGCACCATAAAATATAAATCAAATCACACGCAGACAAAGATTAAAAATTTTGACCAAACACAAAACGAATAATAAGATTCTCTCTCGTTTCCCTCAAAGCAGTAAATTGAAATTAATCATGTCCTAAAACTCGACACAAAAACACACAGAGATAGAGATAATAGAGAAGACATTCATCAACAAAAATGGGCGCAATTGGGTTGCTACTTTCGGATTTCATCCTATCATTTATGTGGGTATGGTCTGGAATGTTGGTTAGAATTCTTGTCTTCAACGTTCTAGGGTTTGCTCATGATTTTACGGGTGAAATGGTAAAGCTGGGTTTCTCTCTTCTTAATCTGTTCTTCTTTGCCCTTATGCTCAAATTTTCCAAAGGTGGGGCCTA…
TtXIP1;1	CCTTAAGAAAGTGGGACATATAAGGATATAACAATGCCCCTATATATATATAGACATATTGTGTATTGGTGTATTGAAGAATTGTAAAGCTACAACGTTTTTTTTTTTTTTTTTTGTAGCTCTGATTTTAATAGTTATGGGTGAAGGTATTTTAGTGTTTAGAGATTTCGAAAATCAAAATCAGCTGGATGGAGCAGAAATAGCTAGAATTCTTCCGATTTCGGCCACTCCCATACGAAAGGCTTTGAGCACTTTGTAATACTCTCTCCGTTCAGATAAACGTTTACATTGTTGTTTTTGCACTTTGCATCATTTTTCATGCTCTTTTACTCGATTTTTTCTTTTTAATTTTGTGTTGTTCATCTATAAATAATATTTTTTTTTGTTCCGCCCCTTTCT…
TtXIP1;2	GAAGAATTTTAAAGGTACAACAGGTTTTTTTTTGTGGTAGCTCTAATTTTAATTAATTATGGGTGAAGGTATTTTAGTGTTTAGAGATTTCGAAAATCAAAATCAGCTGGATGGAGCAGCCATAGCTAGAATTCTTCCGATTTCAGCCACTCCCATACGGAAGGCTTTGAGCACTTTGTAATACTCTCTCCGTTCAGATAAACGTTTACATTGTTGTTTTTGCATTTTGCATCATTTTTCGTGCTCTTTTACTCGATTTTTCCTTATTAATTTTGTGTTGTTCGTCTATAATTTGTATTTTTGTTGTTCCCCCTTTCTCATACAATTATTTCTGCAGGTCTGTCTCAGGGAACATTGAGGACAAGAAGGTTGGATTGTTTGATGAACTTCTTCATCGGC…

## Sheet: TtAQPs-Proteins
TtPIP1;1	MEGKEEDVRLGANKYSERQPLGTVAQDRDYREPPAAPFFEAGELTSWSFYRAGIAEFIATFLFLYISILTVMGVNRSPSKCGTVGIQGIAWAFGGMIFALVYCTAGISGGHINPAVTFGLFLARKLSLTRAVFYIVMQCLGAICGAGVVKGFQPGPYQLLGGGANAVNHGYTKGDGLGAEIVGTFVLVYTVFSATDAKRSARDSHVPILAPLPIGFAVFLVHLATIPITGTGINPARSLGAAIIYNKPHAWADHWIFWVGPFIGAALAALYHVVVIRAIPFKSKA
TtPIP1;2	MEGKEEDVRLGANKFSERQPLGTVAQDRDYREPPAAPFFEAGELTSWSFYRAGIAEFIATFLFLYISILTVMGVNRSPTKCGTVGIQGIAWAFGGMIFALVYCTAGISGGHINPAVTFGLFLARKLSLTRAVFYIVMQCLGAICGAGVVKGFQPGPYQLLGGGANAVNHGYTKGDGLGAEIVGTFVLVYTVFSATDAKRSARDSHVPILAPLPIGFAVFLVHLATIPITGTGINPARSLGAAIIYNKPHAWADHWIFWVGPFIGAALAAVYHVVVIRAIPFKSKA
TtPIP1;3	MEGKEEDVKLGANKYSERQPLGTSAQSKDYKEPPPAPFFEPGELTSWSFYRAGIAEFIATFLFLYITVLTVMGVNRSPSKCASVGIQGIAWAFGGMIFALVYCTAGISGGHINPAVTFGLLLARKLSLTRAVFYMIMQCLGAICGAGVVKGFQPSPYEMLGGGANVVNHGYTKGSGLGAEIVGTFVLVYTVFSATDAKRSARDSHVPILAPLPIGFAVFLVHLATIPITGTGINPARSLGAAIIYNKGHAWDDHWIFWVGPFIGAALAAVYHQIVIRAMPFKSTRT
TtPIP1;4	MEGKEEDVKLGANKYSERQPLGTSAQSKDYKEPPPAPFFEPGELTSWSFYRAGIAEFIATFLFLYITVLTVMGVNRSPSKCASVGIQGIAWAFGGMIFALVYCTAGISGGHINPAVTFGLLLARKLSLTRAVFYMIMQCLGAICGAGVVKGFQPSPYEMLGGGANVVNHGYTKGSGLGAEIVGTFVLVYTVFSATDAKRSARDSHVPILAPLPIGFAVFLVHLATIPITGTGINPARSLGAAIIYNKGHAWDDHWIFWVGPFIGAALAAVYHQIVIRAMPFKSRA
TtPIP2;1	MGKDFEAGEARDISKDYQDPPPSPLFDTEELTKWSFYRAVIAEFVATLLFLYITVLTVIGYKSQSDPINGPDAGCGGVGILGIAWAFGGMIFILVYCTAGISGGHINPAVTFGLFLARKLSLTRALLYMIAQCLGAICGVGLVKAFQSAHYDRYGGGANSLAVGYSKGTGLAAEIIGTFVLVYTVFSATDPKRSARDSHVPVLAPLPIGFAVFMVHLATIPITGTGINPARSFGAAVIYNNNKSWDDHWIFWVGPFIGAAIAAIYHQYILRAGLVKALGSFRSSANV
TtPIP2;2	MGKDFEAGGEARDITKDYQDPPPSPLFDTEELTKWSFYRAVIAEFVATLLFLYITVLTVIGYKSQSDPINGPDAGCGGVGILGIAWAFGGMIFILVYCTAGISGGHINPAVTFGLFLARKLSLMRAILYMIAQCLGAICGVGLVKAFQSAHYDRYGGGANSLSVGYSKGTGLAAEIIGTFVLVYTVFSATDPKRSARDSHVPVLAPLPIGFAVFMVHLATIPITGTGINPARSFGAAVIYNNNKSWDDHWIFWVGPFIGAAIAAIYHQYILRAGLVKALGSFRSSANV
TtPIP2;3	MTKDMGAPTEQGSFSAKDYHDPPPAPLIDPGEFGKWSFYRAIIAEFVATLLFLYITVLTVIGYKSQTDPAMNADECGGVGILGIAWAFGGMIFILVYCTAGISGGHINPAVTFGLFLARKVSLIRAIMYMVAQCLGAICGVGLVKAFQKAFYHKYGGGANELAAGYSTGTGLAAEIIGTFVLVYTVFSATDPKRSARDSHVPILAPLPIGFAVFMVHLATIPITGTGINPARSLGAAVIYDNDKAWNDHWIFWVGPFIGAAIAAFYHQFILRAGAVKALGSFRSSSQQV
TtPIP2;4	MTKDMGGAPTEQGSFSAKDYHDPPPAPLIDPGELGKWSFYRAVIAEFVATLLFLYITVLTVIGYKSQTDPAKNADQCGGVGILGIAWAFGGMIFILVYCTAGISGGHINPAVTFGLFLARKVSLIRAIMYMVAQCLGAICGAGLVKAFQKAFYHKYGGGANELATGYSTGTGLAAEIIGTFVLVYTVFSATDPKRSARDSHVPILAPLPIGFAVFMVHLATIPITGTGINPARSFGAAVIYDNDKAWNDHWIFWVGPFIGAAIAAFYHQFILRAGAVKALGSFRSSSQQV
TtPIP2;5	MTKDVEVADQQAPEFSAKDYHDPPPAPLIDMDELKKWSFYRAVIAEFVATLLFLYITVLTVIGYKSQTDPATNADQCGGVGILGIAWAFGGMIFILVYCTAGISGGHINPAVTFGLFLARKVSLIRAVLYMVAQCLGAICGVGLVKAFQKAYYVRYGGGANEMASGYTKGTGLGAEIIGTFVLVYTVCAATDPKRNARDSHVPVLAPLPIGFAVFMVHLATIPITGTGINPARSFGAAVIYNQKKAWDDHWIFWVGPFIGAAIAAFYHQYILRAAAIKALGSFRSSS
TtPIP2;6	MTKDVEVADQQAPEFSAKDYHDPPPAPLIDMDELKKWSFYRAVIAEFVATLLFLYITVLTVIGYKSQTDPATNADQCGGVGILGIAWAFGGMIFILVYCTAGISGGHINPAVTFGLFLARKVSLIRAVLYMVAQCLGAICGVGLVKAFQKAYYVRYGGGANEMASGYTKGTGLGAEIIGTFVLVYTVCAATDPKRNARDSHVPVLAPLPIGFAVFMVHLATIPITGTGINPARSFGAAVIYNQKKAWDDHWIFWVGPFIGAAIAAFYHQYILRAAAIKALGSFRSSS
TtPIP2;7	MAKLKIKQGAVKVLEPWIEALPDRIVVYYPLKSSFKTPKLETIEEERDEQRDDERHACNYRQYISSRCPSNVLLSSQQKTTMTLHQLAALIDMDELKKWSFYRAVIAEFVATLLFLYITVLTVIGYKSQTDPATNADQCGGVGVLGIAWAFGGMIFILAFQSAYYGRYGGGANELAHGYTKGTGLGAEIIGTSFLSTPSLLQLVLAPLPIGFAVFMVHLATIPITGTGINPARSFGAAVIYNQQKAWDDHWIFWVGPFIGAAIAAFYHQYVLRAAAIKALGSFRSSFRSNA
TtPIP2;8	MSKEVSEEGQGLGHQHGKDYVDPPPAPLFDMGELKLWSFYRALIAEFVATLLFLYVTVATVIGHKKQTGPCDGVGLLGIAWAFGGMIFILVYCTAGISGGHINPAVTFGLFLARKVSLIRAVSYMIAQSLGAICGVGLVKAFMKGYYNSLGGGANSVAAGYSKGTALGAEIIGTFVLVYTVFSATDPKRSARDSHVPVLAPLPIGFAVFMVHLATIPITGTGINPARSFGAAVIYNNQKIWDDQWIFWVGPFVGALAAAAYHQYILRAGAIKALGSFRSNPTN
TtPIP2;9	MGDQEDMEEYVAPGQLPKNYHDPPPSPFFNIEELTKWSFYRALIAEFVATMLFLYIAVLTVIGYKSQSDTTVVANGPNAGCGGVGILGIAWSFGGMIFVLVYCTAGISGGHINPAVTFGLFLARKLSVIRAILYMIAQCLGAICGVGLVKAFQKADYQKYGGGANELATGYSMGTGLGAEILGTFVLVYTVFSATDPKRSARDSSVPILAPLPIGFSVFMVHLATIPITGTGINPARSFGAALIFNEKKAWDDQWIFWVGPFIGAAFAAIYHQYILRAGFAKAVGSYMSSHNM
TtPIP2;10	MGDQEDMEEEYVAPGQLPKNYHDPPPSPFFNLEELAKWSFYRALIAEYPWDCLVLWWHDLCSCLLHGWYLRWDINPAVTFGLFLARKVSVIRAILYMLAQCLGAICGVGLVKAFQKAHYQKYGGGANELATGYSMGTGLGAEILGTFVLVYTVFSATDPKRSARDSSVPILAPLPIGFSVFMVHLATIPITGTGINPARSFGAAVIFNEKKAWDDQWIFWVGPFIGAAFAAIYHQYILRAGFAKAVGSYMSSHNM
TtPIP2;11	MSKEVSEEGQGLGHQHGKDYVDPPPAPLFDMGELKLWSFYRALIAEFVATLLFLYVTVATVIGHKKQTGPCDGVGLLGIAWAFGGMIFILVYCTAGISGGHINPAVTFGLFLARKVSLIRAVAYMIAQSLGAICGVGLVKAFMKGYYNSLGGGANSVAAGYTKGTALGAEIIGTFVLVYTVFSATDPKRSARDSHVPVLAPLPIGFAVFMVHLATIPITGTGINPARSFGAAVIYNNKKIWDDQWIFWVGPFVGALAAAAYHQYILRAGAIKALGSFRSNPTN
TtTIP1;1	MPIREISVGRPEEAYHPNTLKQGLAEFISTVIFVFAGEGSGMAFAKLTEGAAGTPAGLVAAAIAHAFALFVAVSVAANVSGGHVNPAVTFGAFVGGNISLLRGIVYWIAQCAGSTVACLLLKFATGGLETSAFALSANVSVWNALVFEIVMTFGLVYTVYATAVDPKRGDLGTIAPIAIGFIVGANILVGGAFTGASMNPAVSFGPALVSWSWNCHWVYWVGPLVGGGLAGLIYEVIFIGHHNEPAPADYQRLSA
TtTIP1;2	MPIREISVGRPEEAYHPNTLKQGLAEFISTAIFVFAGEGSGMAFAKLTEGAAGTPAGLVAAAIAHAFALFVAVSVAANVSGGHVNPAVTFGAFVGGNISLIRGIVYWIAQCAGSTVACLLLKFATGGMETSAFALSANVSVWNALVFEIVMTFGLVYTVYATAVDPKRGDLGTIAPIAIGFIVGANILVGGAFTGASMNPAVSFGPALVSWSWNCHWVYWVGPLVGGGLAGLIYEVIFIGHHNEPAPADYQRLSA
TtTIP1;3	MAIPRLALGSPAEASHPGALKAALAEFISMLIFVFAGEGSGMAFSKLTDNGSATPAGLVAAALSHGFALFVAVSVGANISGGHVNPAVTFGAFLGGKISFIRTILYWIAQCLGAVVACLLLSFSTGGLPTSAFALSSGVTVWNALVFEIVMTFGLVYTVYATAVDPKKGDIGIIAPLAIGFIVGANILAGGAFDGASMNPAVSFGPAVVSWTWNNHWVYWLGPFIGSGIAALLYHIVFIQPENYEELPSSA
TtTIP1;4	MAIPRLALGSPAEASHPGALKAGLAEFISMLIFVFAGEGSGMAFSKLTDNGSATPAGLVAAALSHGFALFVAVSVGANISGGHVNPAVTFGAFLGGKISLIRTILYWIAQCLGAVVACLLLSFSTGGLPTSAFALSSGVTVWNALVFEIVMTFGLVYTVYATAIDPKKGDIGIIAPLAIGFIVGANILAGGAFDGASMNPAVSFGPAVVSWTWNNHWVYWLGPFIGSGIAALLYHIVFIQPENYEELPSSAR
TtTIP1;5	MNLGIAGKLTDNGAATPTGLIAAALTHAFALIVAVSVGANISGGHVNPAVTFGAFVGGHITLLRAILYWIGQLFGSVVACLLLKFATGMETSAFALSAGVTSWNAVVFEIVMTFGLVYTVYATAVDPKKGTIGTIAPIAIGLIVGANILVGGAFDGASMNPAVSFGPAVVSWTWTNHWVYWLGPFIGAAIAAIIYDHIYIGDYTHQQLPSTDY
TtTIP1;6	MPIYRIAVGNPGEASHPDALRAALAEFFSMIIFVFAGQGSGMAFSKLTDNGAATPTGLIAAALAHAFALIVAVSVGANISGGHVNPAVTFGAFVGGHITLLRAILYWIGQLFGSVVACLLLKFATGMKETSAFALSAGVTSWNAVVFEIVMTFGLVYTVYATAVDPKKGTIGTIAPIAIGLIVGANILVGGAFDGASMNPAVSFGPAVVSWIWTNHWVYWLGPFIGAASAAIIYDHIYIGDYTHQQLPSTDY
TtTIP2;1	MAGLAFGRFDDSFSWASIKAYIAEFISTLLFVFAGVGSCIAFSKLTADAALSPSGLVAVAVCHAFALFVAVSVGANISGGHVNPAVTFGLALGGQITILTGVFYWIAQLAGSTVACFLLKAASGGMTTPIHSVAAGVGAIEAVVMEIIITFALVYTVYATAVDPKKGSLGTIAPIAIGFIVGANILAAGPFSGGSMNPARSFGPAVASGNFQDHWVYWVGPLVGGGLAGLTYANVFMHHEHAPLSNDY
TtTIP2;2	MAGLAFGRFDDSFSWASIKAYIAEFISTLLFVFAGVGSCIAFSKLTADAALSPSGLVAVAVCHAFALFVAVSVGANNSGGHVNPAVTFGLALGGQITILTGIFYWIAQLAGSTVACFLLKAASGGLTTPIHSPAAGVGAIEAVVMEIIITFALVYTVYATAVDPKKGSLGTIAPIAIGFIVGANILAAGPFSGGSMNPARSFGPAVASGNFQDHWVYWVGPLVGGGLAGLTYANVFMQHEHAPLPNDY
TtTIP2;3	MVKLTFGSFGDSFSVASLKAYLSEFIATLLFVFAGVGSAIAFSKLTSDGALDPAGLVAVAVAHAFALFVGVSIAANISGGHLNPAVTFGLAIGGNITLLTGLFYWVAQVLGSVVACLLLKFVTNGKSIPAHGVASGMGPLEGIVMEIVITFALVYTVYATAVDPKKGSIGVIAPIAIGFIVGANILAAGPFSGGSMNPARSFGPAIVSGDLAQSWIYWVGPLIGGGLAGLVYGDIFIGSYSPVPDSESYA
TtTIP2;4	MVKLTFGSFGDSFSVGSLKAYLSEFIATLLFVFAGVGSAIAFSKLTSDGALDPAGLVAVAVAHAFALFVGVSIAANISGGHLNPAVTFGLAIGGNITLLTGLFYWVAQVLGSVVACLLLKFVTNGMSIPAHGVASGMGPLEGIVMEIVITFALVYTVYATAVDPKKGSIGVIAPIAIGFIVGANILAAGPFSGGSMNPARSFGPAIVSGDLAQSWIYWVGPLIGGGLAGLVYGDIFIGSYSPVADSES
TtTIP2;5	MVKLDFGSIGDSFSVSSLKAYLAEFIATLLFVFAGVGSAIAFSKLTSDGALDPAGLVAVALAHAFALFVGVSIAANISGGHLNPAVTFGLAIGGNITILTGLFYWVAQVLGSVVACLLLKYVTNGMSIPAHGVASGMNALEGIVMEIVITFALVYTVYATAADPKKGPLGTIAPIAIGFIVGANILAAGPFSGGSMNPARSFGPAIVSGDLSQSWIYWIGPLIGGGLAGLVYGDVFIGSYSSVPDSESYA
TtTIP2;6	MVKLCFGSIGDSFSVSSLKAYLAEFIATLLFVFAGVGSAIAFSKVTSDGALDPAGLVAVALAHAFALFVGVSIAANISGGHLNPAVTFGLAIGGNISILTGLFYWVAQVLGSVVACLLLKYVTNGMSIPAHGVASGMNAFEGIVMEIVITFALVYTVYATAADPKKGPLGTIAPIAIGFIVGANILAAGPFSGGSMNPARSFGPAIVSGDLSQSWIYWIGPLIGGGLAGLVYGDVFIGSYSSVPDSGSYA
TtTIP3;1	MAPPRRYAFGRPEEATHPDSIRATLAEFISTFIFVFAGEGSLLALRKLYGADAPTGASSLMVIALAHAFGLFAAVASSLNVSGGHVNPAVTFGALVGGRVSFLRAILYWIAQLLGAVVAALLLRLATDGMRPVGLGVAYGEGNLNAFLLEIIMTFGLVYTVYATAIDPKRGSLGTIAPLAIALVVGANILVGGPFDGASMNPARAFGPALIGWRWRHHWIYWVGPLIGGGLAGLIYEFIVIPTEAPHAHQPLAPEDY
TtTIP3;2	MAPPRRYAFGRPEEATHPDSIRATLAEFISTFIFVFAGEGSLLALRKLYGADAPTGASSLMVIALAHAFGLFAAVASSLNVSGGHVNPAVTFGALVGGRVSFLRAILYWIAQLLGAVVAALLLRLATDGMRPVGLGVAYGEGNLNAFLLEIIMTFGLVYTVYATAIDPKRGSLGTIAPLAIALVVGANILVGGPFDGASMNPARAFGPALIGWRWRHHWIYWVGPLIGGGLAGLIYEFIVIPTEAPHAHQPLAPEDY
TtTIP4;1	MAKIALGTSREAMQPDCIKALAVEFICTFLFVFAGVGSAMAADKVGADPLVGLLFVGTTHAFAAAVMIAAGFNISGGHLNPAVTVGLAAGGHITVFRSILYIIDQCAASAAACFLLKYSTGGLVFISLIIDSMIHFNLYTTIVDPKKGHLQSQGILLTGLVVGANIFAGGLFSAASMNPARSFGPALVSWNWANHWIYWVGPLIGGALAGLICENFFIVRSHVLLSREEEA
TtTIP4;2	MAKIALGTSREAMQVDCIKALVVEFICTFLFVFAGVGSAMAAACRTDKAGADPLVGLLFVGTTHAFAAAVMIAAGFNISGGHLNPAVTIGLAAGGHITVFRSILYIIDQCAASAAACFLLKYSTGGLTTPIHALGKGVDPTQGLLMEIVLTFSLLFTVYTTIVDPKKGHLQSQGILLTGLVVGANIFAGGLFSAASMNPARSFGPALVSWNWANHWIYWVGPIIGGALAGLICENFFIVRSHVLLSREEEA
TtTIP5;1	MAPRTTFSAHFKQSVTPNSLRSYLAEFISTFIYVLAAAGSVMASRKLMPDARSDPASLVVVAMANAFGLTSAVYISASVSGGHVNPAVTFGKVVGCHIPIPTALFYWISQILGSVMACLLLKVTTVDQNVVTHAIAGQMTGFGASMLEGALTFGLVYTVYAASDPRHGQLGSMGPIAIGLITGANVLAAGPFSGGSMNPAYSFGAAAIGGSFRNQAVYWVGPLIGAAVAGLLYDNVVYPPVDSDTPRSAQEGCRV
TtTIP5;2	MQDLTLLAYWWLPWQMHLALPPPSIFSASVSVGHVNPAVTFGKVVGCHIPIPTALFYWISQILGSVMACLLLKLTTVDQNVVSHAIAGQMTGFGASMLEGALTFGLVYTVYAASDPRHGQLGSMGPIAIGLITGANVLAAGPFSGGSMNPAYLFGAAAIGGSFRNQAVYWVGPLIGAAVAGLLYDNVVYPPVDSDTPRSAQEGCRV
TtNIP1;1	MGEIARANGNHEVTLNVKDGAETLPQNTTTNNSSASNFNDNRSGSSCISIPFLQKMIAEALGTYFVIFAGCAAVIVNKDEEKVVTLPGISIVWGGVVMVMVYSVGHISGAHFNPAVTIAFATCRRFPWKQVVPAYVLCQVVGSTLASGTLRLIFNGHQTQFAGTLPAGTDLQSFVIEFIITFYLMFVISGVATDNRAIGELAGLAVGATILLNVMFAGPISGASMNPARSLGPAIIANQYKGLWIYIVAPMAGAIAGAWVYNIIRFTDKPLREITKSGSFLKSKGSSVHNGSQR
TtNIP1;2	MGEIARANGNHEVTLNVKDGAETLPQNHATSNSSASNFNDNRSAGSSCISIPFLQKMIAEALGTYFVIFAGCAAVIVNKDEQKVVTLPGISIVWGGVVMVMVYSVGHISGAHFNPAVTIAFATCRRFPWKQVPAYVLCQVVGSTLASGTLRLIFNGHQTQFAGTLPAGTDLQSFVIEFIITFYLMFVISGVATDNRAIGELAGLAVGATILLNVMFAGPISGASMNPARSLGPAIIANQYKGLWIYIVAPMAGAIAGAWVYNIIRFTDKPLREITKSGSFLKSKGSSVRNGSQR
TtNIP2;1	MTPPTKINHVDDDQSLRKLEEGCVTILRQPLKTSLDPSSCSSTATLVILQKLLAEVIGTYFIVFTGCAAIVIEKTNGSVTYPGICVTWGLIIMIVVYTFEHISCHFNPAVTITYTLLRGFPFKQVPLYISAQIIGSILASGTLDLLFDVNAEAYFGNLPSGSNAQSLVMEFIISFILMFVIFGTAFDHRAHNEFAGVAIGMTILINALIAGTISGASMNPARSIGPAIVKHVYKGLWIYVVGPTLGCIAGGVAYNLVRYLDKFPFEVARFRLLLKSSKPKDLITH
TtNIP2;2	MTPPTKINHVDDDQSLRKLEEGCVTILRQPLKTSLDPSSCSSTATLVILQKLLAEVIGTYFIVFTGCAAIVIEKTNGSVTYPGICVTWGLIIMIVVYTFEHISCHFNPAVTITYTLLRGFPFKQVPLYISAQIIGSILASGTLDLLFDVNAEAYFGNLPSGSNAQSLVMEFIISFILMFVIFGTAFDHRAHNEFAGVAIGMTILINALIAGTISGASMNPARSIGPAIVKHVYKGLWIYVVGPTLGCIAGGVAYNLVRYLDKFPFEVARFRLLLKSSKPKDLITH
TtNIP2;3	MTPPTKINHVDDDQSLRKLEEGCVTILRQPLKTSLDPSSCSSTATLVILQKLLAEVIGTYFIVFTGCAAIVIEKTNGSVTYPGICVTWGLIIMIVVYTFEHISCHFNPAVTITYTLLRGFPFKQVPLYISAQIIGSILASGTLDLLFDVNAEAYFGNLPSGSNAQSLVMEFIISFILMFVIFGTAFDHRAHNEFAGVAIGMTILINALIAGTISGASMNPARSIGPAIVKHVYKGLWIYVVGPTLGCIAGGVAYNLVRYLDKFPFEVARFRLLLKSSKPKDLITH
TtNIP3;1	MDTNSQIAPSSKKGQNIYHVLMTSFNQHYPPEFIRQVVAEIIATYLLVFVTCGAAAISATDERRIARLGASLVGGMIVTVMIYAVGHISGAHMNPAVTLAFAAVRHFPWKQVPLYAAAQLAGAISAAFTLRVLLHPIRLLGTTSPSGTDLQALIMEIVVTFSMMFVTSAVATDTKAVGELAGIAVGSAVCITSILAGPISGGSMNPARTLGPALASGHYKGIWVYMVGPVIGTLMGAWSYNFIRVDESNKQIHAICSTSSLSFKLRRMRSENNIATSTTVGDDPLYGV
TtNIP4;1	MVAQLMGSILASGTLALMFDVTPKAFFGTVPAGSNGQSLAIEIIIFFLLMFVISGVATDTRAIGELAGLAVGMTIMLNVFVAGPISGASMNPARSLGPALVKHNFKGILVYIIGPPIGTITGAFAYNLIRFTDKPLRELTKSCSFLKSLSTKRGNEG
TtNIP4;2	MGTNTNTDDILQEEDLKKVEEGNGNGIGTSSKFDSFCSSPSVVCLTQKLVAEVFGTYFVIFAGCGSVVVNKLYGETVTFPGICVTWGLIVMVMVYSLGHISGAHFNPAVTLTFAIYRHFPYKEVPFYMVAQLAGSILASGTLALMFDVTPKAFFGTVPAGSNGQSLAIEIIISFLLMFVISGVATDTRAIGELAGLAVGMTIMLNVFVAGPISGASMNPARSLGPALVKHNFKGIWVYIIGPPIGTITGAFAYNLIRFTDKPLRELTKSSSFLKSLSTKRGNEGQ
TtNIP5;1	MPELMNGSVGGGGEDHTDVSVSVPPTPEGTPAPLFRHGHVDSMSYERSSMPRCKCFPEALGFGFGSGHANSCFTDFKVPDVTLTRKLVAEFVGTFILIFAATAAPIVNQKYAGAETLIGNAASAGLAVMIVILSTGHISGAHLNPSLTIAFAALRHFPWVQVPAYIAAQVAASILASLTLKGVFHPYMSGGVTIPSVSLTQAFGLEFLITFNLMFVVTAVATDTRAVGELAGIAVGATVMLNILVAGPSSGASMNPVRTLGPAVAAGNYKAVWIYLVAPTLGALAGAAIYKLVQLQEHEAEAPRPVRSFRR
TtNIP5;2	MPELMNGAGGGGEDHPDVSVSVPPTPEGTPAPLFRHGHVDSMSYERSSMPRCKCFPEALGFGPGHANSCFTDFKVPDVTLTRKLVAEFVGTFILIFAATAAPIVNQKYAGSETLIGNAASAGLAVMIVILSTGHISGAHLNPSLTIAFAALRHFPWVQVPAYIAAQVAASILASLTLKGVFHPYMSGGVTIPSVSLTQAFGLEFLITFNLMFVVTAVATDTRAVGELAGIAVGATVMLNILVAGPSSGASMNPVRTLGPAVAAGNYKAVWIYLVAPTLGALAGAAIYKLVQLQEHEAEAPRPVRSFRR
TtNIP6;1	MQNMDAEDTASMPSTPVTPGTPGAPLFGGFRGDRPTTTPRKSLLGNCFTVETWPNEEGSLPAVTCTMMMPPPPVPVAKKVVAEFIGTLILIFAGTATAIVNQKTPGSETLIGCAASSGLAVMIIILATGHISGAHLNPAVTIAFAALKHFPWTQVPVYIGAQILASLCAAFMLKAVFHPIMGGGVTVPSVNYGQAFALEFVIAFNLMFVVTAVATDTRAVGELAGIAVGATVMLNILIAGPATGGSMNPVRTLGPAIAADNYKGIWIYCTAPILGALCGAGVYTAVKLPEEDEDALKQPSGVPSFRR
TtNIP6;2	MDAEDTASMPSTPVTPGTPGAPLFGGFRGDRPTTTPRKSILGNCFTVETWPNEEGSLPAVTCTMMMPPPPVPVAKKVVAEFIGTLILIFAGTATAIVNQKTPGSETLIGCAASSGLAVMIIILATGHISGAHLNPAVTIAFAALKHFPWTQVPVYIGAQILASLCAAFMLKAVFHPIMGGGVTVPSVNYGQAFSLEFVIAFNLMFVVTAVATDTRAVGELAGIAVGATVMLNILIAGPATGGSMNPVRTLGPAIAADNYKGIWIYCTAPILGALCGAGVYTAVKLPEEDEDALKQPSGVPSFRR
TtNIP7;1	MAGNCDEMSPSTETPATGNRSLTKLSASSRMLSVTLLKKAGAEFIGTFILVFAAAAGPIVDQKYNGVETLIGNAACSGLVVMILVLSIGHISKAHLNPAVTIAYASLRHFPWAQVPIFIVAELLGSISASFLLKATYHPFMSGGVTVPSVGAWQAFVLEFVATFVLMFVITAVATDPRAVGDLAGVAIGGAVMLDILIIGPLTGASMNPARTLGPAIATGRYQQLWIYMVAPPAGAITGAAVYALIKLGKDED
TtNIP7;2	MAGNCDEMSPSTETPATGNRSLTKLSASSRMLSVTLLKKAGAEFIGTFILVFAAAAGPIVDQKYNGVETLIGNAACSGLVVMILVLSIGHISKAHLNPAVTIAYASLRHFPWAQVPIFIVAELLGSISASFLLKATYHPFMSGGVTVPSVGAWQAFVLEFVATFVLMFVITAVATDPRAVGDLAGVAIGGAVMLDILIIGPLTGASMNPARTLGPAIATGRYQQLWIYMVAPPAGAITGAAVYALIKLGKDED
TtNIP7;3	MAGNCDEMSPATETPATGNRSLTKLSASSMMLSVTLLKKAGAEFIGTFILVFAAAAGPIVDQKYNGVETLIGNAACSGLVVMILVLSIGHISKAHLNPAVTIAYATLRHFPWSQVPIFIVAELLGSISASFLLKATYHPFMSGGVTVPSVGAWQAFVLEFVATFVLMFVITAMATDSRAVGDLAGVAIGGAVMLDILIIGPLTGASMNPARTLGPAIATGRYQQLWIYMVAPPAGAITGAAVYALIKLEKDED
TtNIP8;1	MLGESLRPNGQSQKEESASGQLQNNQQQMRAAHAESVHEHDDIDRSFPRNEIQKFALGFIPRGWSSWNINPARPMLAEMLGTFMLIFCICGILGSMELVGNQVGLMEYATTAGAAIIVIVFSLGRVSGAHVNPAVTIAFAVFGHFPWSKVPFYVGAQLLGSILATYIGVLVYGVKAELMTTHPIQGRASSAFWAEFVASFLVMFVATSLARDAKSVGNQLSGIVMGIAITLAVLITGPISGGSLNPARSLGPAILAKKFDHIWVYLFAPVAGAVLGVLTVHVLCRQQLPPSPSTSSPANQLLTIASSLISLLKSHGHYFDLEKAI
TtNIP8;2	MLGESLRPNGQSQKEKSTSGQLQNNQQQMRAAHDESVHEHDDIDRSFPRNEIQKFALGFIPRGWSSWNINPARPMLAEMLGTFMLIFCICGILGSMELVGNQVGLMEYATTAGAAIIVIVFSLGRVSGAHVNPAVTIAFAVFGHFPWSKVPFYVGAQLLGSILATYIGVLVYGVKAELMTTHPIQGRASSAFWAEFVASFLVMFVATSLARDAKSVGNQLSGIVMGIAITLAVLITGPISGGSLNPARSLGPAILAKKFDHIWVYLFAPVAGAVLGVLTVHVLCRQQLPPSPSTSSPANQLLTIASSLISLLKSHGHYFDLEKAI
TtNIP8;3	MLAEMLGTFMLIFCICGILGSMELVGNQVGLMEYATTAGAAIIVIVFSLGRVSGAHVNPAVTIAFAVFGHFPWSKVPFYVGAQLLGSILATYTGELVYGVKAELMTTNPIQGRASSAFWAEFVASFIVMFVATSLARDAKSVGNQLSGIVMGIAITLAVLITGPISGGSLNPARSLGPAILAEKFDHIWVYLFAPVAGAVLGVLTVHVLCRQQLPSSPNTSSPATNSLP
TtNIP8;4	MLAEMLGTFMLIFCICGILGSMELVGNQVGLMEYATTAGAAIIVIVFSLGWVSGAHVNPAVTIAFAVFGHFPWSKVPFYVGAQLLGSILATYTGELVYGVKAELMTTNPIQGRASSAFWAEFVASFIVMFVATSLARDAKSVGNQLSGIVMGIAITLAVLITGPISGGSLNPARSLGPAILAKKFDHIWVYLFAPVAGAVLGVLTVHVLCHQQLPSSPNTSSPATNSLP
TtSIP1;1	MAAGTIDSIKLAIGDGILTFMWVFCASTIGLFTYLISTWFAIQGPLTLVITTSIVATLVFMFTFIGQILGGASFNPTGTAAFYAAGLGRDSLLSMALRFPAQAAGAVGGAIAISEVMPSQYKHMLGGPSIKVDLHTAAAAEGVLTFLISLAVLIIILKVPGGTLVKTWLLAMATVTLVVTGSTYTGPSMNPANAFGWAYINNRHNTWDQFYVYWICPFIGAIVAAWVFRIIFPQPKKQKKAPKNRKAD
TtSIP1;2	MAAGTMDSIKLAIGDGILTFMWVFCASTIGLFTYLISTWFAIQGPLTLVITTSIVATLVFIFTCIGQILGGASFNPTGTAAFYAAGLGRDSLLSMALRFPAQAAGAVGGAIAISEVMPSQYKHMLGGPSIKVDLHTAAAAEGVLTFLISLAVLIIILKVPGGTLVKTWLLAMATVTLVVTGSTYTGPSMNPANAFGWAYINNRHNTWDQFYVYWICPFIGAIVAAWVFRIIFPQPKKQKRAPKNRKAD
TtSIP2;1	MGAIGLLLSDCILSFMWVWSGMLVRILVFNILGFAHDFTGEMVKLGFSLLNLFFFALMLKFSKGGAYNPLTVLAGAISGGFDRFLFTIGARIPAQVLGAIYGVRLLIHTFPEIGRGPKLNVHIHHGALTEGVLTFMIVFISLSLARSIPGSFVTKTWIASMSKLTLNILGADLTGGCMNPASVMGWAYARGDHMTKEHILVYWLAPIEGTLLAVWISRLLFPKEKADTKPKSE
TtSIP2;2	MGAIGLLLSDFILSFMWVWSGMLVRILVFNVLGFAHDFTGEMVKLGFSLLNLFFFALMLKFSKGGAYNPLTVLAGAISGGFDRFLFTIGARIPAQVLGAIYGVSLLIHTFPEIGRGPKLNVHIHHGALTEGVLTFMIVFISLSLAKSIPGSFVTKTWIASMSKLTLNILGADLTGGCMNPAAVMGWAYARGDHMTKEHILVYWLAPIEGTLLAVWISRLLFPKEKADTKPKSE
TtXIP1;1	MAELLGTALLVFMVDMVVISSFETSTKTPNIVMSCFVALLITILLLTTIPVSGGHINPVITVSTTLVGQISFFRAVVYIVAQCIGAVLGALALSAVVNDTISSNFSLGGCTLTVIAPGPNGPTMVGIETSQALWIEIFCTFIFLFPVSMAFDHRQSKALGPVVVCSIIGIVVGLIVFVSTTITTKRGYSGAGINPARCIGPAIIRGGHLWAGHWVFWVGPAIACAVFYLYTLIIPQEHFKPRVNKQ
TtXIP1;2	MGEGILVFRDFENQNQLDGAAIARILPISATPIRKALSTLSVSGNIEDKKVGLFDELLHRLGFEELFSLQVWRASMAELLGTALLVFMVDMVVISSFETSTKTPNIVMSCFVALLITILLLTTIPVSGGHINPVITVSATLVGQISFSRAVVYIVAQCIGAVLGALALWAVVNDTISSNFSLGGCTLTVIAPGPNGPTMVGIETSQALWIEIFCTFIFLFPVSMAFDHRQSKALGPVIVCSIIGIVVGLIVFVSTTITTKRGYSGAGINPARCIGPAIIRGGHLWAGHWVFWVGPAIACAVFYLYTLIIPQEHFKPRVNKQ

## Sheet: TtAQPs-Promoters
TtPIP1;1-promoter	TCACATTGAGGCCGTCTATATGAGTTTTTGTGTAATAATATAATAGTGATCTACAGTGAACTAAGCAAAAATTATAGTGAAGATAACAAAGCTTGATTAGTTAAAACAGTAAATATGACCTATAAGGCCCATTATTTGCTCATTATTTGCCAGCTTGTTCTTTCAAGGAAATATAATGTTGATTATAATAAATAATTTGTTTAGTTATAGAGTATAAGAATAAAGGTTGATCTATGATTGATAATGTATCTCTATTCTGCAAGGATATTTGAATTGATTGAATAATCACCTTGCCCGGTAGAGCCAGGGAACATAAAGGAAAGCATATTTACCAAATCTAATTATCGATAAGAAGACAAATAGATTATTAACAAGCCAAACAGCAGCTAGTGAAATTTA…
TtPIP1;2-promoter	GACTTTATTTACCTGCATTTTAAGGATGTCCTCTAACAATTTTAAAATGTTTAACAACAAGAAGTATACAAAAAGATTTTTCTTTCTTCCTTGATAAAAATAGTAATAGTCTACACTAAACTGAACTAAAATTGTACTAAGATAACAAAGCTTGATTAGTTAAAACAGAAATATTACCTATAAGGCCCATTATTTGCCAGCTTGTTCTTTCAAGGAAATATAATGTTGATTACAAGAAATAATTGCTTAGTTTTAGAGTACAAGAACAAAAGTTCTTCCAACATTGATAATATACCTCTCTATTCTCTATTGATAACTTGAAATTGTTTGAATAATCACCCTGGCCGGTAGAGCCAGCCAGGGAACATAAAGGAAAGAATATTTACCAAATCTTGATTA…
TtPIP1;3-promoter	ATGGGGTGACTCAACGCCTCCGCTATTAAAGGGGTGGCGCGGGGGTGGCTCTACTAGAAGTATGGGCAATTTTTAGTTTTGAACTAGTTTCGTAGAATTGGTCCTACAAGGTACTCAGAGAGTACTAGGTCTGAAAGAATGATACCCAAAATTAGAATTAATTTCAATCTGTTCCAAATTTTAATACGTAGAATCGGTTTGATAAGGTCGGTTGCAAATTTAAACCTGCTAGGTCCAAACCAATTCTAAACCAAACTAAATGAGTGAGGATTCTCTTCTGTATTATTTTGATATTGTCTCTGTTTTCCCTTGTAAATAAAAATTGAGTTTGGGAAATTAAACACTTGACTAAGAAAGAGAAGGTATGCCAAGCAAAAAGAGAATGTATACTCTAGATAC…
TtPIP1;4-promoter	AGTCAGGAATTGGAATTGGAATTGGTTGGTATCGATTCCTATTTTTGAGAATTGAAAATGGAATTGGTTAGACCGATTCCGGTTCCGAAACCATCGATTCCAAACTAATTTCAATTCCAGTACTAGGTACCCGGATTTTCTGCTCACCCCTAATATCCATATCCCTATTCCCTAATGTGAACTAAAAAAAAAAGGAAAAAAAAATATTCTACCAAATAGAACTGAAGTATTTTGATGTTTTGGCTTTAGCTTCCTTAAGGCGGGTGGGGCCGCGCAAGTTTGGCGGGGTCCTCCGAAGTCCAGAACCCGAATTTTAGCCTGTTATGCATAGCTAGCTTCTCTACTATCGATTCTCTAGTCTCTAGTAATACTCCATGAGATACCCCTTCAAATTTTGAG…
TtPIP2;1-promoter	TGTGCGATGTATTGCAAAAATATACACCTTCGTTCCGGGTTAGCCCGGAGCCAAAAAACGTGGATTATAACCTTCGTTTTCGGCTTCCGGGGGCACTGGTGCCATTTTTGTCCAAACTTATCTGGGGGATCTATCATGACCCTAGAGGACCCTCAGTACCCCAGGAGGGTCATATGGATCCTCGAACTTCGATATCACCCATGTCTTCGGTGTTTCAGCCCTTAAATCGGTGTCTCGTAAAAATGCCCTTACAAGCCTATCAGGGATTCGATAATGGACCTCGAGGGCCTCTTATGCTCCCTAAGGATGTCTTGTGTGATGTGGTGCGAAAATATCCACCTTCGTTTCGTAGCCTCCTGAAAGCGCAAAAACGTAGATTAAGCCTTTGATTTTTGACTT…
TtPIP2;2-promoter	AATACGTAAAGGTTTGTTCCACTGAATTGCTCTTTAGTTTTTTATTTTATTTTATTTTTTTTTTTAAGGTAAGGAAAATCTTTAGTTACACAAATATATGTATTGATCAAATATCAACATTACAACAAATCAATACATAAAATCTCAATTACCAATAATAATAATAATAATAATAATAATAAATAATAAATAATAATAATATTAATAATAATAACAACAACAACTACTACTACTATCATAATAACAACAAAATGTCCTTTGTAGTCATTTTACATCAAATCAGCTACTAAAAACCATCTGATTTTACCAAACATTTTTAACAATCCGTTTATCCTACCAGTCAGTCAAACCAGCTAATACAACCAGCTAACTACAACCAGCTAACCAAACCAGCTACCA…
TtPIP2;3-promoter	CTGACCAATGACATCTCTCTCTTCAAAATCAAGTTTCCTTATACGATCTCTGTGGTTGTACACATGCCGTCTAGTTGCATTGTCCTCGGGAAATTTTTCCTGAATAGCGGCCAAGATAGCACATGGCTTTGTTTGTGCCGAAGTCATGTCACGAACGAGTTTCTTTGACCCAGGACTAAGACCACTCATCTGACGATATCCCTCAGGATACACAGCAAAGTCATGGTTGTGCGTACCCCTAGTCCCAGGCAATGGGACAATCATCCAACTACTGGACCCATACACTTGCCGAGCTCTTAACTGGAACGTACATTTACAAGCCTTTGTTTTCGATTTCTTCCGAGCAGCAGTATCTAAGTCTCTTAATTCCCCTCTGTAGCGTTCACCTCGATTGCATTT…
TtPIP2;4-promoter	CTTGTTAAACGTTGAAAGATATAACACAAACCTCTTCTCATTCAAATAATTTGGTGTGATTTCATCTAACTCATTAACATTCAACAAGCACAAAAGTCTTCATTCCCGTTGTGGTTTGCCCTCTTATTTTTTTGTTGTGGTAAGTAGAGCTAGTTAGTGTCTACTAAGATTGGTCGGTGAGACCACAAGATACGCCACACCACGCACAACGTACACATTCTACACAATTAGCTACATGCCGTGTGAGACAGATCAGAAGAGCTTGGAAGAGGTGCAAAGTGGGTCCAACTTGAAGTGACATAAAATTTCAAAATTAGTAGGACGGGAAGGTCAGGTGCGTGGTTCTTTTCTTGGACGGCAAAAAAATGCGTCGCTCGAAAATTCTAATAACTTTATAAC…
TtPIP2;5-promoter	CGTCTTATACAAGTTTTTGTGTATTTAGTTTAAGAAGAAAAACGAATTTCCCTTTAATAAAATCACTTTTATACTCATGATATCCAGCTAATAGATTTTGAAAATATAACCAAAAGAAAAGATCCTTTGCTGTCTAAAAAGATAACAACTTATCTTCTCCATACTTGGGCAATAAGGCAATAGACTTTTAAGGAAAATAAAACTATTTATAAAATATCTTTTTCTTATCTCTCCAAAATTGATTTTCCGGGATAAAATTCTTTATAAAAGCCTAGCTTCTCTTCCAAGAAAATATCTCAACTTAAAAGTCGAAAAAACAAAAAATTCAGAGAAAAACTTATCCAGATTTCATCCTTTTCTATCAGATATGTGGAACATGTTCACAGTTCACATGAACTA…
TtPIP2;6-promoter	AGTTAATTGAAATTGATGATAAGAGTTTAAATTAGATAAGATGCCCTATAAAGTCATAGTAATCTTATTATATGGCATTCATGATATTAAACGGATTATATAAATATTTATCCGTATATTACTAATAGTTTTTCATACGGACAATTACACTTTCATTTTTCGATGAGATTAATAATCACGTTATATTAGTTCTATTATATAATCACAGTCCTTGCAACGCACGGGCATACTCATAGGCATCCACATAATCTTTTATGAAAGAAAGTCTAGCTTCTCTTCCAATAAAATATCTCCAAGTTAAAAGTCGAAAATACAAAAATTTCAGGAAAAAAACTTATGCAGATTTCGTCCATTTCTGTTAGATATGTGGAACAAGTTCACAGTTCACATGAACTATTT…
TtPIP2;7-promoter	TATAGTCTATAGGCCTAGCTGGTTAGATTGATTGTTTGTCCACATCACGTAGTTCGCGGGCCATGGTAAAACTAGTAACCGTTGGAGACCTTTTGAAGCTTTAAACTGAGAGTAATGGGAAGCTAAGGGGGAGGATGCATGGTCCCATTCCCCGCAAATTCACAAAGCCACCAAAACAATGAAGTATGAATTTGAGATTTTCATTCCATGTGGAGTATTTGGCCAGGGCTATCAAATTCAAATTCAAACTCTTCAATTTAAATAAATAAGCATTCTAAAATATCTCGATTGTACATTAGTAGTAGACTATGATCATTATTATCATAAAACATTGTACACTATCTTTACATGCAGTGCCAAAATTAAGAGTAGCAAAGATGAAAGAGGGCAAGGAAGAAA…
TtPIP2;8-promoter	TACAAATAAATTAATGCATAATTTGTACGTAATGCATTATTATTATTATTATTATTATTATTATTATTATTATTATTATTATTATTATTATTATTATTATTATTATTATTATTATTATTATTATTATTATTATTTCAGAGAATATCGAAACTTGTCGGGTCAACCCATATATACAACACAACACTAATAATCTGATCATTTGGATGCCAGAAGATCAGATCAGATGAGAGAGGAAAGTCCAGTCCAGTCCAGTCCAGTCCCCCAATAAGGAGTACTAATTTTAATACTGCTAAATTTGTACGTCTTCGGATGTGAGAGGATGAGGTTCCATTCTTCAATTCTTAAATGATTTCGTCTCACTCCCTCTGGCATTTGGATTTTATGATTGTACCTCTCTTA…
TtPIP2;9-promoter	TGTGATATTTTCGGCCCAACATTATTGATGCTTAGCTTGTTTTTTTTTTCTTCTTAAATATCCAGATGCCAGAACACTAAAAGTATACTCACTTTTATCTGTTACCGCATACATACATGCATGCATATCCAGCATTGCATGATTTTTTTCCTAGTTATTGTAGAGGGATTCCCTAGTTAAATATTGTGCGTATGCGCATAATTATCTTGTATAAATTATTGTTTGTTATACTTCCGTTACGTTATTAGTAGTATTTTAGAGACTAGCTAGAGGATAATTTCACACGGTCACACCATATTTCATACAAGGAATCTGACCATTGTTAAAGCATCTAATAGTAGGCTTGCAATCAAAGAATTCAGTTACAAGTAATTACAATAATAATGCATATATAACGGG…
TtPIP2;10-promoter	TGTTAATTGAGATCTGATGCTCTCGCCCGATGTTCGAAGAAAAAATGTTCAGCGAATCCACCCCAGTCCATCGAGCCCACCTCCCTGTTCAGCGAACCCGTCAACCCCAAACCGCCCCTAGCCACCGTTGTCGTCCAATCGTCCTCAACCACCGCATCCTCAACCACCCATCCACCACTAACCATCCATAAACCATTGAACGTTAAACACTGTATATATGATTGAAAAAAAAATAATTCAATTTTTATTATTCTAGTTACCTAAATATCTATCATAATTATTTTCATTCAAAATTAAGTTTTAATCAAATGAATGAATCATGTTGATTAAAGTTTAGGTTTTTTCCATTGTGTACGTAGAACGAGTATAGTAAAAATTTTCAGATAAAAAAAAAGGAAT…
TtPIP2;11-promoter	AAAATACATTTTATGAACCTAATGTTCTTGGGATTTGCGATAAGCAATGGGTCAGATTTTTCATAAGTTCGACAATATGTCAACTGTCAAGATTCAATATACTTGGCTTCCACCACGAAAAAAGGTAGAATATGCACTACTGCACAAGACACTAATCTAATCATCATATGCTAAATGAAGTTATTAACTTAATTATCATCCTAAAAGCCAATTCGACTTGGGAGTAGGTGAAGTACGACACCAATATTACATGAGTACGAGTATCTTGTTTTCACAAATGCTTATATGAGACCGCTTCAATGTGTGAGACGCCTCAAATAAGTCTTGTCACGCTGATGCCAACGTTGGTTATAGAGGTGATCTCATGTTGAGTCAATCTCATAAGAGACCCTTTGTCGT…
TtTIP1;1-promoter	GGTTGTTTTAGAAACTTTTACGAATGAATAATTGTTTGTTTAAGGAGTAATTTTTATTAATAAACAAAATAACGTGTTGCTTTCTCATCCTTTGTTTTTTTTTTTTTTGATCATCATCCTTTGTTAGATATAGCCAAACATACAAACATCATTGAGAGTGTTGTTGATCATGTACGCCAAGAGTGCTCCGCGATGCAAATTTATATCGTAGGAGTAGCCCTGTCATAGATAGCTATTATATTAGTGTTATTAACCTTGTAAATAAGAAACGCATATGTAAATAGTCGTTTATTAACTCAACTCTACCACAATCGTAACAATCATTTATGTTGAGCATCCAAATCATTGCAATAGGACCACTTTCCTCAACGTAGGGTTCATACACTGTTGTGATAATCT…
TtTIP1;2-promoter	TTATTTCTAACAATGAGTTGTAAACTTGATGGTGAAGGGATTAACATGCAGATGGTTAAGTGTCCTTATTATTCGGGGCACCTAAAGGTGTCCTTACCCTTCTTCTTTATTTATTTTATTTTTGATTGTTGTTTTGGAATAGGTAAGGAAGTCGAGCTTTTAGACTAATTACCTTATTTCTTAAATCCATTACATTATTTGGGAAAAGGGATGGCCTAAGGCCCATATTACAAATATCATCCTCAATTCTAAAGTTAAAGGGACTAAGACTTAAACCCCTAATTTCTAGGGTGGAGATGTGAGAGCTTAATTAAGTGAGCTCTTCACTTTTGCTCCTAAAGGTATCACTATTATTAAGTAGCAAATAATCAAAAACTATTTAGGTGCATCGTCCCATTA…
TtTIP1;3-promoter	AAAAAAAATAAAATAATAATAATAATAATAATAATAATAATAATAATAATAATAATAATTATTATTATTATTATTATTATTATTATTATTATTATTATTATTATTATTATTATTATTATTATTATTATTATTATTATTAACAGTGAAAATTAAACAATTTCCGATTTTTCAGTTTCTCCCAGTTTCTCTCAGTTGCTCCCAGTTTGACCCAATTTTCTCCAGTTACCACTTAGACTTCCCAGTTTTATCCAGTTTCTCCCAGTTACCAATTCCAGTTTCCAGTTGAAAAGAACGTGCCCTTCGGATTGCCTCATTCAACATTCATACAGATATGCTTAAACATGTCAATCCATTAGGTCGCTTAGATTAAACAATTTTGAAGATAAGGTAGCAACATTA…
TtTIP1;4-promoter	AAAGGGTCGTCCAAACCTAATAAGGACCCTACAACTCACCCCGAGGCTCTCTTATTAGTCTCCCATACAATATGGCGCGAAAATAACAATTTTTGTTTCGGGGTTCTTCGGAACCCAAAAATTGCCTCATTCAACATTCATACAGATATGCTTAAACATGTCAATCCATTACATTAGGTTGCTTAGATTAAACAATTTTAAAGATAAGGTATCAACATTAAACAAAGATCATAAACTGAATATCCTGCAAGAAAGATGAGTAATATTCCAAGAAACCCACGAAAATGACCAGAAAACAGAATAAAATTGTACAAGAAATTGACAGGTGAGAGGTTTTACAAACAAACCATATCCTATAATCTACAAGTATGGATCAATATATTAATCATATTCAACAAG…
TtTIP1;5-promoter	GAAGCAAGGAATAAAAGAAATCTTCATTTATAAAAAAGTCATACAATATTTACAAAGTCGAATTTTTCAAAACAAGTACAAATCTAAAATAATAAAATGAATATGTTTTTCCAACACTACTTCTTGAACTTGGTGTTTCGCACGACTCCGTCGAATTTTGAAATGTCCACACATGATCCCTTCGATCGGAGATTATCACAAAAAGTGCTGCAAATGTTTGGAAGAACGTAAAGATCCACTTGATGTAGAAAACCCAACTTGTTTCCACCAGAACTATACAAATCAAACAAATTTCAAAAACTAATTGGAATTCTTACAGTGTAATTAATAACCCTATAAATGCTTACAATAAGTGAGAGAAAGAATCTCATAGTGAGAGGGAAATCAACTCTCACATAT…
TtTIP1;6-promoter	ACAAGTTAATCCAGGAACAGCGCGCGTGAAACAGCATCAGAAATCAGCTGTTGGCTCCAGGAATAAGGGGTGGTGGAATCAGGAATGTTCTGTTCATTGTTCATGTTTCCTTGTGGTGCTGGAGGAGACCATGGGATGTTTGATCTAAGACTTCTCCTGGAGGGTACTGTAGGAACTGCACCGAGACCTTCAACGTCGAAATCTTCCAAGGAAAAAACTCTTTTTATTAGTCCTGTGTAGTGTGTGTGTATATATATATATATATGCAAGTGAGTTCAAATTAAGAGAATAATTAGAAGTTTTAAGAGAATATGTAGAGTACCATTATTAGCACCAAATGTAAATGTTGGTGGTGCAAAGCAAACCAGTAAGATCAACAACAGTAACGCTGATGCGAAT…
TtTIP2;1-promoter	TTTTTGGCAGATCTAATGTTGGTTTAGCGCATAATCTTGCTAAGTGGGCTTTAGCCTCAGGTTTTGAAGCAACTGCTCTCCTTGTACTACCCACTTAGGTGTTGTATGCTTGTAATTCGTTTCTTTTTTTTGATCACTGCAATTCCTTTCAAAATGTTAAAGGAGGTGTTATGCTGGTTTAGCCCAAAAAAAAAAAAAGAAGCAATTAAACCTACTAGCTACAATTTATACTAGCTTTTTTTTTTTTTTTTTTTTTGGCTCCAGTATAATTCATACCGGCCAGTTGAGGATTAAGATGGGTTGGTGCCTAATATTATAGATTATCTCCTAAGCTGTTCTGAACACAAAGTACCAACTACCATCACTTGATCCTAGAAAACAATAAACCATTCTATGTTT…
TtTIP2;2-promoter	TATATTTTAACCCATTTCCACCACTGTTTTTGACGTTTATTGGCCTCAGGTCTCTAATTGGGGGGGGGGGGGGGTCCTAATACCAATGTTATAAGACTTTACTAAGTTAGCATTTAACAAATAAATAGTTAGCTTAACTCATGTAAAATTGTAAACAATATCTCTCCATGTACAAAGCAATTAAACCTACAATTCATACTCTCTTTTTTACTGGCTCCAGTATAATTCATACCGGCCAATTGAGGATTAAGATGGGTTGGTGCCTAATAGAATAGGTTATCTCCTAAGCTGTTCTGAACACAAAGTACCAACTACCATCACTTGATCCCAGAAAACAATAAACCATTCTATGTTTTTGGAGGGGAACAAACAGTCGACTTTTAGTTTAAATATTATACT…
TtTIP2;3-promoter	TCATTAAAAATATTAAATTACAAATGGAAAATTTTAAACTACTAACTTTACTAGAAAATCACCATTCTTCATTTCTAACAAAAAAAAAAAGTAATTAGATTTTTTTGCACTGGGTACCCAACCGATTCCAGTTCCCAAAAGTCAGGAATTGGAATTAGAATTAGTTGGTACCGGTTCCTATTTTTAAGAATTGGAATTGAAATTGGTTAGACCGATTATAATTCTGGAACCACCGGTTTCCAACCAATTCCGGTTCCGATACCGGGTACTGAAATTTCTGCTCACCCCTAAAAGGAACCCTGCGGATATACCATTGATCGTTATTTATTCGTTAATATGAGTTTTGACCATCAATTTACTCCTTACGATTCTAAATCTCAGGGTCTAATTTTGAACTAC…
TtTIP2;4-promoter	ACATAATAAATCATATTGGAAATCCATTCGATCCCTAATGGCTGGGCACAAAAATTTAAATCACCTATTTCTACGTACTACGTAGTTTACAGCTGGACGTCTTTTTACTAAAAAAACATTTATATTATACATTTTTATACTACAGTTTTTAATTTTTTACTACAAAAGACATGCTTATCCATCTTCTAAGAAGACATATATCATTAGGCTTCTACATCAAAGATACAACATTTTACCAAAAATAAAAAATAAAAAAAAGTGAAGAAAGAAAGAAAGAAATTAATGAACCTTAGTCCTTACAGATACAGTTGTAACATGGACTTATGAAAATGACGATTAGCTCATTTAACAAAGTACATAATGGTGCGTCTCGCGGGAACCCAGGACCTGCTGGTGGTG…
TtTIP2;5-promoter	GTAGGGGAAGAATAAAGTAATTGAATAAATTTTGAATTATAAATAGAGTTATACCCCTAAAATGTGGGACAATAGCTATTGAACTGAATTGAATGGAGGTCCTTTGTGTGGCGTTGAGAGCATTCAATGAGGGGATGCATTAAATTTGGGCTGTCATACTGTAGCCTCCATTTTTTTCCCCTTTCGAATCAGTAAACAGCAGGTGATGTTGAATTCTGAATTATTGTTCGTCATCATTCATGATGGTGGATGGCGTCTTTCTCTCTCACCCTCTATTTCTCTCTCTGTATGGCATTGCCAACAGGACAACAAATCAACAGCCAGGTGATGTTGCATTGTTACGGACTGTTTGTTGGAAATCTCTTTGCGGTTTGCGAGTTTGGAGAATGCGGTAAGAAC…
TtTIP2;6-promoter	TTATAGGACTTATAGTTATAATTAAGATGATATTTTGAAAATACTTTTTAAAATGAATCTACTAATACTATTTTCACATTATAAAACTTTGTAACTTTTTACAAATAAGTGGTCAAAATTCAATGTAAAGATAAATTTGGGACAGAGAAAGTACAAAACCTTGTGTCACCTAAGTAAAATTATTCAAATTACATATAACTTAAAAAATAATACGGCAAAACTTCAAAGCACCTAAATGAAAATTTTCCTTTCTTATTTCATGCCGAATGTTTTGACCCTTTTTTTTGGGTTGAACTGGAAGGCGTTATTGGGGCTAGGCTGCCCATAGAGTTCGAATAGCAATCATTTCCCTCCCCCTCTACTAACTAACCGACGATAAAAAATATATAGCGAGCTCAA…
TtTIP3;1-promoter	TGTAATCAATATAATTGCCACACTTGTATAGCTTTAGTATGGAAGGAGTCCAGTTGTAAGAATTATCACAATAACCACCATTAAGATCAAGGACCTCTGTAATTTCAATCTCATCCTCATATGTCAAGTTACCACTACCTTGCTGCTTATTAGTGCCTCCTTTAGACCATGGTTCTTTAAAAACAACACTAGACCAACCTCCAGGATCATAAACAACAATCTTCCTTCCAACACCCTTAACCCAACCAATAGATGACTCATTGATATTCCCTGCCTCCTTATCATCCACCATATTAAATGGAAGAAAATTCTGAATTGGAGGATACTTACAGTGCTGAATTGTAGAAGTGAGCACCTCTGAATTTAACTCCAACTGTGGTTGTGGCAAAACAGGGGCTC…
TtTIP3;2-promoter	TAGTCTATTTCACGTTTGTCCTTGTTGATGTTGCTGTTATTGTTAGTAAATATTTTTGATGGGAACTGTGGCACTCCATGCACGATTCTGTCGACAATTTGCTCTAGAGCTGGAAACACAGCTGGAAGTCAGACTTAGAACTGACCTTGATCTTTTGCCTCGGTAAAGATTGACCAGTAGGCAAGTCACCCTGACCTGAGCCAGACACAACTCAATCCAAAGTCCACTTTAGATCAATCTTTGCTTGTCAAGTGACAATGATGGGAAGTTTGAACTCTTTGAATTCGATATTTTGACGTGAACCCCAAATCAACTTGACCAATGTTATGATGACACAAAGATGACTTGAACCTGTGGGACACTTAATAGCCATATAATGGTTAACAGACTTTAACCTAC…
TtTIP4;1-promoter	AGATTTGAACTTAGGTATAAAGGAAACCCCACTCAAGTCTTTACTATTACGCTACAATTATACTATATAATAAGGATGATAGAATTAACATTGTGACCTAATGTACTCGATCATAGCCACAATTTTAATAATTATCACGTCAAAGCCTAATTGACATGCTTCGAATTATATGAAAGACCATAATCCAGCCAAAAAGATGCAAAGGACAAAAATTTGAAGCATTTAGACCAGCTCGTCACTATTTGAAAGTCAAGTGGACGTAACAAAACAAAAGTGAAGTGGTACCGTACTACACTTACCAAACACATTCATTTGACAAAGATGTTTCCCTTTCACCCATTAAGTAACACGGCTAACTTTATTTCTTGTTCCGAAAAGAATCTCCCATTTTTCAGTGAG…
TtTIP4;2-promoter	ATATCCACCTTCGCTCCGGGGCCTTCCGGAAGCCCAAGAAACGTGGATTATATAGCCTTCGTTTTCGGCCTCCGGGGCCGGGTGTCATGTTTGCCTAAACTTCTCTGGGAGGTCTATCATGACCTTAGAGGACCCTCTGTGCCCCGGGAAGGCCATCCGAATCCCCGAACTTTGATATTTTCCATGCATTTGGTGTTCCTACCCTTACATTGGTGTACCGTAAAAATACCGTAACATGCCAATCTGGGAACCGATAACGGACCTCGGGAGCCTCTTATGTTCCCCAATGGTGTCCCGTGCGATGTGGTGCAAAAATATGCACCTTCGTTCCTGGGCCTCTCGGGAAGCCCAAAAAGCGTGGATTATAGCCTTTGATTTTCGGCTTCCCGGAACCTAGTT…
TtTIP5;1-promoter	ATCAGGCTAATGATAATTTGTCCGAGGAAATCATAGAAGAAAAACCCCCTCCTAGGGTTTTTACATGCAACTATTGCAAAGGAGAATTCTCGACATCTCAAGCTTTGGGCGGTCATCAGAACGCCCATAAGCAAGAGAGGGCTCGAGATAAGATGAGACGAGTAGCTGAATCTACACAATGTTCATACCCTCCTTATCCGGGTATGTACAACATATCTTATAATGGTGGATCTTATATTCGATCACCTCTTGGGGTCAAGACTAATTCTATGATTCACAAGCCTACTGGTTATGGATGGCCGATAGTCCATGGGTATAGATATGGATCTGGTGGACAACCTCGACCGCCATTAGTAATTAATCCTTCGCCGTTATCTTATGATCATATGTTGAAGATGA…
TtTIP5;2-promoter	GAGATAAACCCTGTAGTAAGCTTATAGCTTCATTGAGATATAGATATATTATGCTTTTATAAATAAATAAATAAAACATTAAGGCTTAGATAATATTTGTGCTTTCGTTTAACTTTCATTTGGAAGATTTGATGCCAACTGTTCTTTCCTTGCTTAAACTGTAGATGTTATTTCACACGTTTTAATTATGACGATTCAATATCTTCCTAGCTACTTTTTTTTATTTTTGTTAACTATATAATTTCCTATTAAAGTTTTTCAATCTTAATTATTATATTTGCATATAGAACCGATTTTCACCCAAATACAGAACTTCAAAGCAGCGTTAGTAATCTTAACAATTAAACTTGAGATCTTCTAATGAATGAAGTAGATAACAATGTAAGAAGAATCATAGCT…
TtNIP1;1-promoter	CCATTCTATCTTGCATTCTGCAATGAACCATTTGAATGACGTGCCCTTCCATAGCCATGCCAACGACCCACCCGTTATCCAGCATTCTATTGAGTATATTTGACTTAATTTCATCACTTTGCCATGTTCTGGACGAATAATTTTGATATAAATGTATGGTTTTTAGATCCTTAAGTTTCTATTGTTGATTTGTTTCACATTGAGATAAACGACCAATGATATAACAATATTCAGATGATCCACAAAAGAATATTGCTATATACTGTATTATTCTGCAAGAAACCACCTGGTTGAAACATTAGGCCATGGTGCGTGCTTTAAGTTTTAGTGGAGCTAATTGGAATAGTTATCCTATAGCGTTAGGAAAATGTTTGGTTGACCCAGTGGATGGACAACTCA…
TtNIP1;2-promoter	TCCTAGCATTGGGCTACCTATTTTCGAACCATTCTATCTTGCATTCTGCAATGAACCATTTGAATGACGTGCCCTTCCATAGCCATGCCAACCCACCCGTCATCCAGCATTGTATTGAGTATGTTTGACTTAATTTCATCACTTTGCCATGTTCTGGACGAATAATATTGATATAAATGTATGGTTTTTAGATCCTTAAGTTTCTATTGTTGATTTGTTTCACATTGAGATAAACGACCAATGATATTACAATATTCAGATGATCCACAAAAGAATAATATTTGCTATATATTATTCTGAAAGAAACCACCTGGTTGAAACATTGGGTCGTGGTGCGTGCTTTAAGTTTTAGCGGAGCTAATTGGAATAGTTATCATATAGCGATAAACCAACGACAAT…
TtNIP2;1-promoter	TACCGTGAGAGTTAGTTTGTCCTAATTTTTGGGTATGATTGTCTCTCCTTTTGTGAGAGTACTGTTTATTTTCTATTTTGTTTTTCGTATGACAGTATTGCAAATCTTCTTCTTCAAGAGGCTTTCTACAGTGCCAGATTTGTACATTCAACAAATTTATGGCGACAGGGGCATATGGCCCTCCGCGAAAAGGTTGTAATGTGGAAAACAACGATTGAAAGGAGACCATTCAGACTCGTTGAATCTACAATGCATGCTAAGTAGCTTTATTACTCGAATGTTATTTGATGTTTTAAAAATTTATTTGATTTCGTTTGTAAATGCCGTATGACTTATTAATATAAATGAATTTATTTTTTCCCTCCAAAAAAAATAAAAATACCAAGTTTTTTTTTTTTC…
TtNIP2;2-promoter	TACCGTGAGAGTTAGTTTGTCCTAATTTTTGGGTATGATTGTCTCTCCTTTTGTGAGAGTACTGTTTATTTTCTATTTTGTTTTTCGTATGACGGTATTGCAAATCTTCTTCTTCAAGAGGCTTTCTACAGTGCCAGATTTGTACATTCAACAAATTTATGGCGACAGGGGCATATGGCCCTCCGCGAAAAGGTTGTAATGTGGAAAACAACGATTGAAAGGAGACCATTCAGACTCGTTGAATCTACAATGCATGCTAAGTAGCTTTATTACTCGAATGTTATTTGATGTTTTAAAAATTTATTTGATTTCGTTTGTAAATGCCGTATGACTTATTAATATAAATGAATTTATTTTTTCCCTCCAAAAAAAATAAAAATACCAAGGTTTTTTTTTTTC…
TtNIP2;3-promoter	TACCGTGAGAGTTAGTTTGTCCTAATTTTTGGGTATGATTGTCTCTCCTTTTGTGAGAGTACTGTTTATTTTCTATTTTGTTTTTCGTATGACAGTATTGCAAATCTTCTTCTTCAAGAGGCTTTCTACAGTGCCAGATTTGTACATTCAACAAATTTATGGCGACAGGGGCATATGGCCCTCCGCGAAAAGGTTGTAATGTGGAAAACAACGATTGAAAGGAGACCATTCAGACTCGTTGAATCTACAATGCATGCTAAGTAGCTTTATTACTCGAATGTTATTTGATGTTTTAAAAATTTATTTGATTTCGTTTGTAAATGCCGTATGACTTATTAATATAAATGAATTTATTTTTTCCCTCCAAAAAAAATAAAAATACCAAGTTTTTTTTTTTTC…
TtNIP3;1-promoter	TGTGAAACAAAAATTTCTTAATATTTCGTTATCTCCAATAATTTTACTACTAACTCTAGTAATTTTTTTGGAAGATTATACTAATTATTGCGGAGAGAACATGAAAGTATGTAATGCCGAATGATTTTTTCTCAATTATTCAAAATGGACTCCCAAACCAACTTGGCATAATAAATTCAGGGATATATATGGGTATGTTATTTTCCACTGAGTAGGTAAGATCTTGTCACCGATTCCCACTTATTGGACAAGGTCCTGCCACTAATTTTCACTGATTCGGTAAGATTCTTACACTGATTCTCACTGATTCAGTATGGTCTTTACTGATTTTGTGAGTAGAACTGTTGGTCCTGTCACTGATTTTCACTGATTGAGTAAGATCCTGCCACGAATTCTCAC…
TtNIP4;1-promoter	TTCCAAGTCTGTAGGTTAGAGATTTCCTCCTACGTTTGCTATAATCTGCTTCCCAAAAATGTATTTTGACTGGGACATCATCACATTCGTCCGTCTCAAAGCGGCACCAATAGTCCGACATTATACTCTTGACGGGTACTATAATTGTAGTTGATTTATACATTACTTTTAGTTAATTAGTTCACCTGTTCATCCAACCGTTTATCGGTGCATAATGGGTGAAGTAGATTTGGATGGACGGTTGTCTGGTGATTGGTGAACAAGTGGAGGTGAAAATTTAAATGAGTAGATCGATGCAGATGATACTCCAACCATCTCGAATTGTCGTTGTCAGATCTAGTCATAAGCTATTGATTAACCGCCATTGACCAATATAAAGGGCCTAACAGTCCGACTTCT…
TtNIP4;2-promoter	ATTTTTCAGATTGGGTCAAATTTTATCAGCCTTTTAATCAATGATAGATCCCTCTCTTCACTCTCATCGGAGCTATCTGACCGGAAAATAATTTGTGGCGAATACGAGCACCACCATCAATCAGAACTATTTTCGTTTGGAATTGCTTTCTCACAGACTATGATTCTATGAACAAGTCAACCAAAACCATTTTCTTTTGGAATCGCTTCTTTTCTTGGTTGTCTTAGGGTTTATTCTCCCCAACTGAAAAACGTTTATATTTATTACTGAAAATTTATTTTTGTTGAACTTTGTTGAACTTTATTTAACTTTGTTGAACTTTGTTTATTTTTGTTGAAACTTTTTGATTCAAGTGTTTTTTATAACTAGATTGTATATTGGTTTGTTTAACTTTATTTA…
TtNIP5;1-promoter	CAGTCTCAAACACTCCATCGTCCATCCCTTTGGTTCTCGAAATACATCTCTGCAAATATTTTTTTGTGATTAGTCAAATAATCCATAGTCCATCTCTTTGGTTCTCGAAATACATCTCTGCAAATATTTTTGGTGCTACTAATCAGACACATATAGTATAGACTTGAAGTACACATGCATAAATAAATGAAGGTTTAATAGAAAACAAATAATGATTAAAAGAAGAGCCTAAAACCCATTACAGATTTACAGGAAAACAGAGCATACGAAAGCCAAATAAATAAATAAATAAATAAAAAGAAAATAAATTTTGGTGTAAAAAAAATACCTGTAGTCAACATATGCACACATAACCTCTTTTCTTGAGCCTTCCTCTGCTTCAACAAATCCATTTCCTCA…
TtNIP5;2-promoter	ACTTTGGCCAATACAGTTTCCTCAATATTGCAATTTCTTATCGTGAACCAAAAAGAATATTTTTTTGTGTCCACAAGCAAGGGTATCAAGTGCCAATCACAACAACCATTTTCCCGTGCTGGTTTGTAATGGACACTCCAAAATGGTGGGACAACGGATAACTGGTTAAGGAATTTAAAACTGCTCCATGACCAAGGCGAGATTCAAACACTCAACCTTAGTTAAGGATGGATGAGTTAAGGCTACAACTCAACCACATCTCCTTGGTTACCAAAATGAATAATACTAAGGGTATGCTTTTGTCAACTTATCCAATAAATTTATACTTAAATTTAATTTAGATTTGCAACATACTTTTCTCTCACATATTATTATCAATTTAATTTACGTGACAATAAC…
TtNIP6;1-promoter	CACCTAGCATTATACCCTATAAATGCTAGGTGGTAACTGGTACCTTCTTTGCACTTTCATGAGTTAAATAATTTTACAATCTAACAGTCTCAATGATTCAACAAAAGCATTTGTATTACTTCAGCTTTTTGTGAGAAGGCATTTGCATTAGTTTTATACAAAGCTTGCATTAGTCTGATGTGTTCGTTGTTGAACACGAGAGTCCAAATATAAAGTAGCGGGGGTGTCTCGTTCGCCATTCACTTGCACCCTCTTTTTTGAGGAGCAAAAAATATGATAAAATGGCCAATGAGACCACCTTTTTGTATCACTCCTAATTTGTTGTCACCAGTGTGCTACCAAAAATGGAGTGTCATCGCAAAATAAATCAAAGAATTATCTAGGTCGGGCAGAAAATAG…
TtNIP6;2-promoter	TGTCTTAGCTTTTTGTGAGAAGGCAATTAGTTTTATACAAAGCTTGCATTAGTCTAATATGTTCGTTGTTGAACACGAGAGTCCAAACATGAGGTAGCGGGGGATACCTCAGTCGCCAGTCACTTGCACCCTCTTTTTTGAGAAGCAAAAAAACATGATAAAATGACCAATGAGACCTCCTTTTTGTATCACTCCTAATTTGTTGTCACCAGTGTGCTACCGAAAATGGAGTTCAAAGAGTTATCTAGGTCGGGCAGAAAATAGAAGTCATTCAGTGTGAATTTACTAGCTAAAAACATTGTCCATTTTTAAGTGTAGGCCTACCGACAATATGGAAGACAAAAGAAAGAGAGCACTATAAAATTACATAATGACTAATGAGCAAATACTGGGACAATA…
TtNIP7;1-promoter	AGTTTATATTATCCATTGCCAAACTTTGACGTTCCTTGTATCGAACCAACGACGAGCTTCCTTGGATGTTTTGGAACAAACTTAGAGAATGGTAACACTAACAGCCTACTTGATGATATGAAGAAAGCAATGGTGGAGTTGAGCGACGATGTCGAACTGCCCGGCAGCCCACGACCATCAGTAGCAGTTTCAGAACAGGATGTGAAATCAGATGATGGTCCTCAACTATAGTAGTATCAAGTTAGCTACATAGCTAGTGAGTAGTATAGTAGATGAATTTCTTTGTTAATTTGATATTAATTATGAAATTGAAATAGCATTATTATTGTTGATGTGATCAGATGATGAAGCTAGTGTGTTTGAACACTTCCTAGCTAGAAGGTGGCAAACTACTAACTA…
TtNIP7;2-promoter	AGTTTATATTATCCATTGCCAAACTTTGACGTTCCTTGTATCGAACCAACGACGAGCTTCCTTGGATGTTTTGGAACAAACTTAGAGAATGGTAACACTAACAGCCTACTTGATGATATGAAGAAAGCAATGGTGGAGTTGAGCGACGATGTCGAACTGCCCGGCAGCCCACGACCATCAGTAGCAGTTTCAGAACAGGATGTGAAATCAGATGATGGTCCTCAACTATAGTAGTATCAAGTTAGCTACATAGCTAGTGAGTAGTATAGTAGATGAATTTCTTTGTTAATTTGATATTAATTATGAAATTGAAATAGCATTATTATTGTTGATGTGATCAGATGATGAAGCTAGTGTGTTTGAACACTTCCTAGCTAGAAGGTGGCAAACTACTAACTA…
TtNIP7;3-promoter	ATTACAATAATGGAGATAGATCCGCCACCTATGGAGGGTCGTGACATGATACAATCGTTGAACAAAGATTTATTAGAGGCGATGAATAAAAACGACGACGATCAACAGAGAGATTATTATTATTACCAGTTTGATCATCAGTTCAGTTCATTAGAAGACTACTACTACTGCAACAGTACTTTTTATCCGTTGATGCCAGACTTTGACATAGGAGTACCTTGTATCGAACCGACTACGACGAGCTTCCTTGGATGTTTTGGAACAAACTTAGACGACAATAATGCTAACAGCAGCCTACTTGATGATATGAAGAAAGCAACGGTGGAGTTGAGCGACGTCGAACTGCCCGGCAGCCCACGACAATGAGTAGCCGGTTTAGAACAGGATGTGAAATCAGAT…
TtNIP8;1-promoter	TGATGGATTCGGCTTTTCAAGTCGTTTTACCCATGAAGTATATGTTATGCTTCTACAGCAGGCAACATTAATTTAGCTATTTAGCATATAATAAACTCCAATTTTAGATTTCAACACCATTGGTATATATATCATGATTAATTTTCCAACTATACACCTTTCTCTTTTATTTCATCTCACAGTGGCGACCAAGACCTGTATATTCCATATGTGAACACATTGGAATGGATTAGAAAACTCAATGTGCCAATCACTAATGCATGGAGGCCATGGTTAGTCAAAGGTCAAGTTGCTGGGTGAGTAATTCATACTAATCACAACCATTTTATTGTCATATTTAGTACATACTCTCATGTCAATCATACTGGAACAAAATGTGCAGGTATATTACGCAATACT…
TtNIP8;2-promoter	TTTGGTGATAAATTCGAGGGATTTATCACTGAGAGTTGCAAAGGGAGTAGGTTATGGAGAATACCCTTGAACAAAACCAGCTAAGAATTATAGAGAGGAAAGAATTTAGAAGGATCAGGAGAATTATGTGAGAGTGATATTCAGAGAATAATATTTGATAGATACCTCACTCATTCTCTTACAGTGACATATATAGCCTAGGGAAATGCATAGGACCTGCCTTACTACAGACAAAGCCTAGCCAGCTAATCATTAGCTGCAGATTGTACTATGGTACTATGGAATAACGACTATATCAGAATTAAGACATAAAAGGAAATGCTGAAAATGCAACAATGAAAATAAGACTGTTCTTATCCTACTGATGTCAGCAGCTCACGTGCCATATTACTCTAGGAA…
TtNIP8;3-promoter	TTTGAAGCGTATTTTTTTTTCTTTTCTATGGCTTCTACTTAGCTTTGATGGTGTTTCTTTGTAGGAACACGTACCGTGGAAAAAGATGAAATTGTGGAATAAATTTCTCTCTTTGTGGAATGAAAATGGGCTAAATAAAAACTATCGAAAAATAAATAGATAAGTGTATCGAAATTTTACATGGAAAATCTTTCAAAAATAAGAGAAAAAACAAAACATTTGCTCTGATACAACTTCGGCTATAATAGTGTAAGAGTACAAGAATGTTGTCTTCATTCTCTAAACCAGTTGTTGCTGATACATTATTCTCGATTCCGTATTCTCCTTCTTCCATAACCTAAGCTTGTAGAAGGAAGAGATAAGAGGCCTATGAAGAATGTGGTCAAAAATCCATATATA…
TtNIP8;4-promoter	AGCGTATTTTTTTTTCTTTTCTATGGCTTCTACTTAGCTTTGATGGTGTTTCTTTGTAGGAACACGTACAGTGGAAAAAGATGAAGTTGTGGAATAACTTTTCTCTCTTTGTGGAATGAAAATGGGCTAAATAAAAACTATCGAAAAACAAATAGATAAGTGTATCGGAATTTTACATGGAAAACCTTCCAAAAATAAGAGAAAACAACAAAACATTTGCTCTGATACAACTTCGGCTATAATAGTGTAAGAGTACAAGAATGTTGTCTTCATTCTCTAAACCAGTTGTTGCTGATACATTATTCTCGATTCCGTATTCTCCTTCTTCCATAACCTAAGCTTGTAGAAGGAAGAGATAAGAGGCCCTATGGAGAATGTGGTCAGAAATCCATATATAAT…
TtSIP1;1-promoter	AGATAAGAAGGATCTCTTGTGGCTGTGGGGTATTGGAGTGTAGATCAGTGCAGCCTAGTACATCCAAAATCAATGATCTTAGATTCTTGGAAACATTATTATTATTGATCATGTATGAAACTATGAATTGATGTATATATGTTTGCAATGTTTGATATATTTTTCTACTTACTAACTTTGCATTTACTCAAAAGTTGGATTTTCTTGAAAGGAAGTGATCAATGATTTACAATCATTAGGTTAATTATTAAGAGGGTTAGTAAGATAGATTTATAGTAAACTTAATTTCAACAATAGATCATCGAATGATTTATAGTACAATTCTTGAAGAATGATTTTAGGATATTTTCTATATGTCATGCGCCTACATCGAGTTCAAATATTTAAAAGATTACGAAC…
TtSIP1;2-promoter	CGCAAGAAAATAATCACTGTGATCGACGGTAGATACCATTGGTTGTGAACAAAAAAAAACTCACAAAACATTAAAATCTTTTTGTTTTTTCTTTTTTATTTTAATTTTGTGAGTTATTATACCAAATACTACTACACCATTTTTTTTTTATAAGGTAAGAAGAAAAAGACACTAAGAGCCCCTCCTTTCAAAGATGACTCCTAATCGATCTTCAAGAAGAATGCGATGTAGTTCTAATTAATCGAAAGGGAACTCATCTCATAATCCAATTATTTGATTTGAGTCTTCCAACAAACCCAAAAATAAAACAAAATGCCCAATTTGTTCCCCTTCCTTAGCTGACTCATTCCTCCACCATTTATATCTGCAGTTTCCACTCCCCACAAGCCACAACACAAT…
TtSIP2;1-promoter	GGATATCAAAATTCACTATTCGAAATTTCGGATACGGATTCGGATATCAAAAATCACTATCCGAAATTTTGGATATCCGATTTTCGGATATCCGAAATTTTGGATATCCGGTTATGAACAACCCTACCTGTAATTCATCCGATCCAAAATATCTTATCCATTTGACTTTTCGTGATTTTTAAGATAACACTTTGACTAATTTTGATAGTTATGATTCTAAAACCACAAAATTATAAAAATATGATATTTTTGAAAAATAAAATTCAAAATGAATCAAAGTAGGGTTTTTTTTTTTTTTTGTGTAAATCTTTATCATTTTTTTGAATTAATGACCGAAGTTTGTAGACGTTGATCTCCTAAAATCAAATGGAAAGGATATTTGCAACGGACACCGGGAGT…
TtSIP2;2-promoter	AGCATCGGATAAATTCCGAGTGTATGTAATAGCCTGCAAACCATACACACTAGGCAAGTAAACAAGTTAAATCTTGTAGACATGCTCAGCAAAGAGGCCCCGTGAGAATTGAACCCATAATAACCTTTGTCATAAAATTTCAACCTCACAACCAACTCCACTACCTCTTTCAAGGCAAAAAAAACTATATGAGTATATGGTGTATGTGCATACACAAAGTACACAACACACACACAATATCATAATTAATTCGAACTTCCATGCGTACGTACGTTCGTACCTGGAGTGATATGCCTCGCATATATGCATCCTAATAATTTTCTTCAAGGAATAAATTGAACATCCCAAGAAATTATAAGAAAACCCATACTTACGACTTATTACACGAGCAACTTGTTG…
TtXIP1;1-promoter	TCTTGCATTTGCTAATTCCCCTGCAACTGCTGGGTGGGATAAGGATTCTCCACCAAAATCCTCACTTTGATATTGTCAAATTTGAGTAGTTATTTTAAAGGGAGAACAGTAAGCAATTCCTCCCCGTAGGACTGTAACGTGTAAAATGAGTAACTTGTAACTTTGTAACAGGATTGTGTATGCGATCATATTAAAAGGTTTTTCGATTCTAGAAACTCTTTCCGTCTCAAATAAATGTTTATTGTTCCATTTTTCTTATTCCACACAAATATTTACATTGTTGATAAAGTAAGTGGATTTGAACAATCTAACTCCCCAAAAGACCCTCATGATGTCAACGCCAAGAAGCCTGAAATACATAGATTCTTATTGCATTTTATTTTAATAAGTTAACTAGAT…
TtXIP1;2-promoter	TTTGATGATATTGTCAAATTTGAGTAGTTATCTTAAAGAGAGAATAGTTAGCAATACCTCCTTGTAGGATTGTAATGTGCAAAAGGAGTAACTTGTAACTTTGTAAAAGGATTGTGTATGTAATCGTATTAAAAGGTTTTTCGATTCTAGAAACTCTTTCCGTCTCAAATAATTGTTTATTGTTCTATTTTTCTTATCCCATATAAATATTTACATTATTGATAAAGTAAGTGGATTTAAATAATCTAACTCCCAAAAAGACCCTTATAATGTCAACGCAAAAAAGTCTGAAATACATAAAATCTTACAGCATTTTATTTTAAAAAATTAACTAGATCAGAAGTATAAGTAACGGGAGATTGATCATATATGTTCCAATTTCAATGAATTAATTCCTGT…

## Sheet: AtAQPs-Proteins
AtPIP1;1	MEGKEEDVRVGANKFPERQPIGTSAQSDKDYKEPPPAPFFEPGELSSWSFWRAGIAEFIATFLFLYITVLTVMGVKRSPNMCASVGIQGIAWAFGGMIFALVYCTAGISGGHINPAVTFGLFLARKLSLTRALYYIVMQCLGAICGAGVVKGFQPKQYQALGGGANTVAHGYTKGSGLGAEIIGTFVLVYTVFSATDAKRNARDSHVPILAPLPIGFAVFLVHLATIPITGTGINPARSLGAAIIYNKDHSWDDHWVFWVGPFIGAALAALYHVVVIRAIPFKSRS
AtPIP1;2	MEGKEEDVRVGANKFPERQPIGTSAQSDKDYKEPPPAPLFEPGELASWSFWRAGIAEFIATFLFLYITVLTVMGVKRSPNMCASVGIQGIAWAFGGMIFALVYCTAGISGGHINPAVTFGLFLARKLSLTRAVYYIVMQCLGAICGAGVVKGFQPKQYQALGGGANTIAHGYTKGSGLGAEIIGTFVLVYTVFSATDAKRNARDSHVPILAPLPIGFAVFLVHLATIPITGTGINPARSLGAAIIFNKDNAWDDHVMGLLGWTIHWCCTCCSLPRYSHQSHPIQVQKLKLIEFYLKSGFCS
AtPIP1;3	MEGKEEDVRVGANKFPERQPIGTSAQTDKDYKEPPPAPFFEPGELSSWSFYRAGIAEFIATFLFLYITVLTVMGVKRAPNMCASVGIQGIAWAFGGMIFALVYCTAGISGGHINPAVTFGLFLARKLSLTRAVFYIVMQCLGAICGAGVVKGFQPNPYQTLGGGANTVAHGYTKGSGLGAEIIGTFVLVYTVFSATDAKRSARDSHVPILAPLPIGFAVFLVHLATIPITGTGINPARSLGAAIIYNKDHAWDDHWIFWVGPFIGAALAALYHQLVIRAIPFKSRS
AtPIP1;4	MEGKEEDVRVGANKFPERQPIGTSAQSTDKDYKEPPPAPLFEPGELSSWSFYRAGIAEFIATFLFLYITVLTVMGVKRAPNMCASVGIQGIAWAFGGMIFALVYCTAGISGGHINPAVTFGLFLARKLSLTRAVFYMIMQCLGAICGAGVVKGFQPTPYQTLGGGANTVAHGYTKGSGLGAEIIGTFVLVYTVFSATDAKRSARDSHVPILAPLPIGFAVFLVHLATIPITGTGINPARSLGAAIIYNKDHSWDDHWIFWVGPFIGAALAALYHQIVIRAIPFKSKS
AtPIP1;5	MEGKEEDVNVGANKFPERQPIGTAAQTESKDYKEPPPAPFFEPGELKSWSFYRAGIAEFIATFLFLYVTVLTVMGVKRAPNMCASVGIQGIAWAFGGMIFALVYCTAGISGGHINPAVTFGLFLARKLSLTRALFYIVMQCLGAICGAGVVKGFQPGLYQTNGGGANVVAHGYTKGSGLGAEIVGTFVLVYTVFSATDAKRSARDSHVPILAPLPIGFAVFLVHLATIPITGTGINPARSLGAAIIYNKDHAWDDHWIFWVGPFIGAALAALYHQIVIRAIPFKSKT
AtPIP2;1	MAKDVEAVPGEGFQTRDYQDPPPAPFIDGAELKKWSFYRAVIAEFVATLLFLYITVLTVIGYKIQSDTDAGGVDCGGVGILGIAWAFGGMIFILVYCTAGISGGHINPAVTFGLFLARKVSLPRALLYIIAQCLGAICGVGFVKAFQSSYYTRYGGGANSLADGYSTGTGLAAEIIGTFVLVYTVFSATDPKRSARDSHVPVLAPLPIGFAVFMVHLATIPITGTGINPARSFGAAVIYNKSKPWDDHWIFWVGPFIGAAIAAFYHQFVLRASGSKSLGSFRSAANV
AtPIP2;2	MAKDVEGPEGFQTRDYEDPPPTPFFDADELTKWSLYRAVIAEFVATLLFLYITVLTVIGYKIQSDTKAGGVDCGGVGILGIAWAFGGMIFILVYCTAGISGGHINPAVTFGLFLARKVSLIRAVLYMVAQCLGAICGVGFVKAFQSSYYDRYGGGANSLADGYNTGTGLAAEIIGTFVLVYTVFSATDPKRNARDSHVPVLAPLPIGFAVFMVHLATIPITGTGINPARSFGAAVIYNKSKPWDDHWIFWVGPFIGAAIAAFYHQFVLRASGSKSLGSFRSAANV
AtPIP2;3	MAKDVEGPDGFQTRDYEDPPPTPFFDAEELTKWSLYRAVIAEFVATLLFLYVTVLTVIGYKIQSDTKAGGVDCGGVGILGIAWAFGGMIFILVYCTAGISGGHINPAVTFGLFLARKVSLIRAVLYMVAQCLGAICGVGFVKAFQSSHYVNYGGGANFLADGYNTGTGLAAEIIGTFVLVYTVFSATDPKRNARDSHVPVLAPLPIGFAVFMVHLATIPITGTGINPARSFGAAVIFNKSKPWDDHWIFWVGPFIGATIAAFYHQFVLRASGSKSLGSFRSAANV
AtPIP2;4	MAKDLDVNESGPPAARDYKDPPPAPFFDMEELRKWPLYRAVIAEFVATLLFLYVSILTVIGYKAQTDATAGGVDCGGVGILGIAWAFGGMIFVLVYCTAGISGGHINPAVTVGLFLARKVSLVRTVLYIVAQCLGAICGCGFVKAFQSSYYTRYGGGANELADGYNKGTGLGAEIIGTFVLVYTVFSATDPKRNARDSHVPVLAPLPIGFAVFMVHLATIPITGTGINPARSFGAAVIYNNEKAWDDQWIFWVGPMIGAAAAAFYHQFILRAAAIKALGSFGSFGSFRSFA
AtPIP2;5	MTKEVVGDKRSFSGKDYQDPPPEPLFDATELGKWSFYRALIAEFIATLLFLYVTIMTVIGYKSQTDPALNPDQCTGVGVLGIAWAFGGMIFILVYCTAGISGGHINPAVTFGLLLARKVTLVRAVMYMVAQCLGAICGVALVKAFQSAYFTRYGGGANGLSDGYSIGTGVAAEIIGTFVLVYTVFSATDPKRSARDSHVPVLAPLPIGFAVFIVHLATIPITGTGINPARSLGAAIIYNKDKAWDHHWIFWVGPFAGAAIAAFYHQFVLRAGAIKALGSFRSQPHV
AtPIP2;6	MTKDELTEEESLSGKDYLDPPPVKTFEVRELKKWSFYRAVIAEFIATLLFLYVTVLTVIGFKSQTDINAGGGACASVGLLGISWAFGGMIFILVYCTAGISGGHINPAVTFGLFLASKVSLVRAVSYMVAQCLGATCGVGLVKVFQSTYYNRYGGGANMLSDGYNVGVGVGAEIIGTFVLVYTVFSATDPKRNARDSHIPVLAPLPIGFSVFMVHLATIPITGTGINPARSFGAAVIYNNQKAWDDQWIFWVGPFVGAAIAAFYHQFVLRAGAMKAYGSVRSQLHELHA
AtPIP2;7	MSKEVSEEGKTHHGKDYVDPPPAPLLDMGELKSWSFYRALIAEFIATLLFLYVTVATVIGHKKQTGPCDGVGLLGIAWAFGGMIFVLVYCTAGISGGHINPAVTFGLFLARKVSLVRALGYMIAQCLGAICGVGFVKAFMKTPYNTLGGGANTVADGYSKGTALGAEIIGTFVLVYTVFSATDPKRSARDSHIPVLAPLPIGFAVFMVHLATIPITGTGINPARSFGAAVIYNNEKAWDDQWIFWVGPFLGALAAAAYHQYILRASAIKALGSFRSNATN
AtPIP2;8	MSKEVSEEGRHGKDYVDPPPAPLLDMAELKLWSFYRAIIAEFIATLLFLYVTVATVIGHKNQTGPCGGVGLLGIAWAFGGMIFVLVYCTAGISGGHINPAVTFGLFLARKVSLPRAVAYMVAQCLGAICGVGLVKAFMMTPYKRLGGGANTVADGYSTGTALGAEIIGTFVLVYTVFSATDPKRSARDSHVPVLAPLPIGFAVFMVHLATIPITGTGINPARSFGAAVIYNNEKAWDDHWIFWVGPFVGALAAAAYHQYILRAAAIKALASFRSNPTN
AtTIP1;1	MPIRNIAIGRPDEATRPDALKAALAEFISTLIFVVAGSGSGMAFNKLTENGATTPSGLVAAAVAHAFGLFVAVSVGANISGGHVNPAVTFGAFIGGNITLLRGILYWIAQLLGSVVACLILKFATGGLAVPAFGLSAGVGVLNAFVFEIVMTFGLVYTVYATAIDPKNGSLGTIAPIAIGFIVGANILAGGAFSGASMNPAVAFGPAVVSWTWTNHWVYWAGPLVGGGIAGLIYEVFFINTTHEQLPTTDY
AtTIP1;2	MPTRNIAIGGVQEEVYHPNALRAALAEFISTLIFVFAGSGSGIAFNKITDNGATTPSGLVAAALAHAFGLFVAVSVGANISGGHVNPAVTFGVLLGGNITLLRGILYWIAQLLGSVAACFLLSFATGGEPIPAFGLSAGVGSLNALVFEIVMTFGLVYTVYATAVDPKNGSLGTIAPIAIGFIVGANILAGGAFSGASMNPAVAFGPAVVSWTWTNHWVYWAGPLIGGGLAGIIYDFVFIDENAHEQLPTTDY
AtTIP1;3	MPINRIAIGTPGEASRPDAIRAAFAEFFSMVIFVFAGQGSGMAYGKLTGDGPATPAGLVAASLSHAFALFVAVSVGANVSGGHVNPAVTFGAFIGGNITLLRAILYWIAQLLGAVVACLLLKVSTGGMETAAFSLSYGVTPWNAVVFEIVMTFGLVYTVYATAVDPKKGDIGIIAPLAIGLIVGANILVGGAFDGASMNPAVSFGPAVVSWIWTNHWVYWVGPFIGAAIAAIVYDTIFIGSNGHEPLPSNDF
AtTIP2;1	MAGVAFGSFDDSFSLASLRAYLAEFISTLLFVFAGVGSAIAYAKLTSDAALDTPGLVAIAVCHGFALFVAVAIGANISGGHVNPAVTFGLAVGGQITVITGVFYWIAQLLGSTAACFLLKYVTGGLAVPTHSVAAGLGSIEGVVMEIIITFALVYTVYATAADPKKGSLGTIAPLAIGLIVGANILAAGPFSGGSMNPARSFGPAVAAGDFSGHWVYWVGPLIGGGLAGLIYGNVFMGSSEHVPLASADF
AtTIP2;2	MVKIEIGSVGDSFSVASLKAYLSEFIATLLFVFAGVGSALAFAKLTSDAALDPAGLVAVAVAHAFALFVGVSIAANISGGHLNPAVTLGLAVGGNITVITGFFYWIAQCLGSIVACLLLVFVTNGESVPTHGVAAGLGAIEGVVMEIVVTFALVYTVYATAADPKKGSLGTIAPIAIGFIVGANILAAGPFSGGSMNPARSFGPAVVSGDFSQIWIYWVGPLVGGALAGLIYGDVFIGSYAPAPTTESYP
AtTIP2;3	MVKIEVGSVGDSFSVSSLKAYLSEFIATLLFVFAGVGSAVAFAKLTSDGALDPAGLVAIAIAHAFALFVGVSIAANISGGHLNPAVTLGLAIGGNITLITGFFYWIAQCLGSIVACLLLVFVTNGKSVPTHGVSAGLGAVEGVVMEIVVTFALVYTVYATAADPKKGSLGTIAPIAIGFIVGANILAAGPFSGGSMNPARSFGPAVVSGDLSQIWIYWVGPLVGGALAGLIYGDVFIGSYEAVETREIRV
AtTIP3;1	MATSARRAYGFGRADEATHPDSIRATLAEFLSTFVFVFAAEGSILSLDKLYWEHAAHAGTNTPGGLILVALAHAFALFAAVSAAINVSGGHVNPAVTFGALVGGRVTAIRAIYYWIAQLLGAILACLLLRLTTNGMRPVGFRLASGVGAVNGLVLEIILTFGLVYVVYSTLIDPKRGSLGIIAPLAIGLIVGANILVGGPFSGASMNPARAFGPALVGWRWHDHWIYWVGPFIGSALAALIYEYMVIPTEPPTHHAHGVHQPLAPEDY
AtTIP3;2	MATSARRAYGFGRADEATHPDSIRATLAEFLSTFVFVFAGEGSILALDKLYWDTAAHTGTNTPGGLVLVALAHALALFAAVSAAINVSGGHVNPAVTFAALIGGRISVIRAIYYWVAQLIGAILACLLLRLATNGLRPVGFHVASGVSELHGLLMEIILTFALVYVVYSTAIDPKRGSIGIIAPLAIGLIVGANILVGGPFDGASMNPARAFGPALVGWRWSNHWIYWVGPFIGGALAALIYEYMIIPSVNEPPHHSTHQPLAPEDY
AtTIP4;1	MKKIELGHHSEAAKPDCIKALIVEFITTFLFVFAGVGSAMATDSLVGNTLVGLFAVAVAHAFVVAVMISAGHISGGHLNPAVTLGLLLGGHISVFRAFLYWIDQLLASSAACFLLSYLTGGMGTPVHTLASGVSYTQGIIWEIILTFSLLFTVYATIVDPKKGSLDGFGPLLTGFVVGANILAGGAFSGASMNPARSFGPALVSGNWTDHWVYWVGPLIGGGLAGFIYENVLIDRPHVPVADDEQPLLN
AtTIP5;1	MRRMIPTSFSSKFQGVLSMNALRCYVSEFISTFFFVLAAVGSVMSSRKLMAGDVSGPFGVLIPAIANALALSSSVYISWNVSGGHVNPAVTFAMAVAGRISVPTAMFYWTSQMIASVMACLVLKVTVMEQHVPIYKIAGEMTGFGASVLEGVLAFVLVYTVFTASDPRRGLPLAVGPIFIGFVAGANVLAAGPFSGGSMNPACAFGSAMVYGSFKNQAVYWVGPLLGGATAALVYDNVVVPVEDDRGSSTGDAIGV
AtNIP1;1	MADISGNGYGNAREEVVMVNLKDEVEHQQEMEDIHNPRPLKKQDSLLSVSVPFLQKLIAEFLGTYFLVFTGCASVVVNMQNDNVVTLPGIAIVWGLTIMVLIYSLGHISGAHINPAVTIAFASCGRFPLKQVPAYVISQVIGSTLAAATLRLLFGLDHDVCSGKHDVFIGSSPVGSDLQAFTMEFIVTFYLMFIISGVATDNRAIGELAGLAIGSTVLLNVLIAAPVSSASMNPGRSLGPALVYGCYKGIWIYLVAPTLGAIAGAWVYNTVRYTDKPLREITKSGSFLKTVRIGST
AtNIP1;2	MAEISGNGGDARDGAVVVNLKEEDEQQQQQQAIHKPLKKQDSLLSISVPFLQKLMAEVLGTYFLIFAGCAAVAVNTQHDKAVTLPGIAIVWGLTVMVLVYSLGHISGAHFNPAVTIAFASCGRFPLKQVPAYVISQVIGSTLAAATLRLLFGLDQDVCSGKHDVFVGTLPSGSNLQSFVIEFIITFYLMFVISGVATDNRAIGELAGLAVGSTVLLNVIIAGPVSGASMNPGRSLGPAMVYSCYRGLWIYIVSPIVGAVSGAWVYNMVRYTDKPLREITKSGSFLKTVRNGSSR
AtNIP2;1	MDDISVSKSNHGNVVVLNIKASSLADTSLPSNKHESSSPPLLSVHFLQKLLAELVGTYYLIFAGCAAIAVNAQHNHVVTLVGIAVVWGIVIMVLVYCLGHLSAHFNPAVTLALASSQRFPLNQVPAYITVQVIGSTLASATLRLLFDLNNDVCSKKHDVFLGSSPSGSDLQAFVMEFIITGFLMLVVCAVTTTKRTTEELEGLIIGATVTLNVIFAGEVSGASMNPARSIGPALVWGCYKGIWIYLLAPTLGAVSGALIHKMLPSIQNAEPEFSKTGSSHKRVTDLPL
AtNIP3;1	MAEISDITTQTQTVVLDIENYQSIDDSRSSDLSAPLVSVSFVQKLIGEFVGTFTMIFAGCSAIVVNETYGKPVTLPGIALVWGLVVTVMIYSIGHVSGAHFNPAVSIAFASSKKFPFNQVPGYIAAQLLGSTLAAAVLRLVFHLDDDVCSLKGDVYVGTYPSNSNTTSFVMEFIATFNLMFVISAVATDKRATGSFAGIAIGATIVLDILFSGPISGASMNPARSLGPALIWGCYKDLWLYIVSPVIGALSGAWTYGLLRSTKKSYSEIIRPNCNKVSSRDRQESQDEICVLRVVDPANQNYFICSSPTDINGKCNVTCKLA
AtNIP4;1	MSSHSDEIEEEQISRIEKGKGKDCQGGIETVICTSPSIVCLTQKLIAEMIGTYFIVFSGCGVVVVNVLYGGTITFPGICVTWGLIVMVMIYSTGHISGAHFNPAVTVTFAIFRRFPWHQVPLYIGAQFAGSLLASLTLRLMFKVTPEAFFGTTPADSPARALVAEIIISFLLMFVISGVATDNRAVGELAGIAVGMTIMVNVFVAGPISGASMNPARSLGPALVMGVYKHIWVYIVGPVLGVISGGFVYNLIRFTDKPLRELTKSASFLRAVSPSHKGSSSKT
AtNIP4;2	MTSHGEEIEDEQISRIEKGNCKDSQGGMETAICSSPSIVCLTQKLIAEMIGTYFIIFSGCGVVVVNVLYGGTITFPGICVTWGLIVMVMIYSTGHISGAHFNPAVTVTFAVFRRFPWYQVPLYIGAQLTGSLLASLTLRLMFNVTPKAFFGTTPTDSSGQALVAEIIISFLLMFVISGVATDSRATGELAGIAVGMTIILNVFVAGPISGASMNPARSLGPAIVMGRYKGIWVYIVGPFVGIFAGGFVYNFMRFTDKPLRELTKSASFLRSVAQKDNASKSDG
AtNIP5;1	MAPPEAEVGAVMVMAPPTPGTPGTPGGPLITGMRVDSMSFDHRKPTPRCKCLPVMGSTWGQHDTCFTDFPSPDVSLTRKLGAEFVGTFILIFTATAGPIVNQKYDGAETLIGNAACAGLAVMIIILSTGHISGAHLNPSLTIAFAALRHFPWAHVPAYIAAQVSASICASFALKGVFHPFMSGGVTIPSVSLGQAFALEFIITFILLFVVTAVATDTRAVGELAGIAVGATVMLNILVAGPSTGGSMNPVRTLGPAVASGNYRSLWVYLVAPTLGAISGAAVYTGVKLNDSVTDPPRPVRSFRR
AtNIP6;1	MDHEEIPSTPSTPATTPGTPGAPLFGGFEGKRNGHNGRYTPKSLLKSCKCFSVDNEWALEDGRLPPVTCSLPPPNVSLYRKLGAEFVGTLILIFAGTATAIVNQKTDGAETLIGCAASAGLAVMIVILSTGHISGAHLNPAVTIAFAALKHFPWKHVPVYIGAQVMASVSAAFALKAVFEPTMSGGVTVPTVGLSQAFALEFIISFNLMFVVTAVATDTRAVGELAGIAVGATVMLNILIAGPATSASMNPVRTLGPAIAANNYRAIWVYLTAPILGALIGAGTYTIVKLPEEDEAPKERRSFRR
AtNIP7;1	MNGEARSRVVDQEAGSTPSTLRDEDHPSRQRLFGCLPYDIDLNPLRIVMAELVGTFILMFSVCGVISSTQLSGGHVGLLEYAVTAGLSVVVVVYSIGHISGAHLNPSITIAFAVFGGFPWSQVPLYITAQTLGATAATLVGVSVYGVNADIMATKPALSCVSAFFVELIATSIVVFLASALHCGPHQNLGNLTGFVIGTVISLGVLITGPISGGSMNPARSLGPAVVAWDFEDLWIYMTAPVIGAIIGVLTYRSISLKTRPCPSPVSPSVSSLLR
AtSIP1;1	MMGVLKSAIGDMLMTFSWVVLSATFGIQTAAIISAGDFQAITWAPLVILTSLIFVYVSIFTVIFGSASFNPTGSAAFYVAGVPGDTLFSLAIRLPAQAIGAAGGALAIMEFIPEKYKHMIGGPSLQVDVHTGAIAETILSFGITFAVLLIILRGPRRLLAKTFLLALATISFVVAGSKYTGPAMNPAIAFGWAYMYSSHNTWDHIYVYWISSFVGALSAALLFRSIFPPPRPQKKKQKKA
AtSIP1;2	MSAVKSALGDMVITFLWVILSATFGIQTAAIVSAVGFHGITWAPLVISTLVVFVSISIFTVIGNVLGGASFNPCGNAAFYTAGVSSDSLFSLAIRSPAQAIGAAGGAITIMEMIPEKYKTRIGGKPSLQFGAHNGAISEVVLSFSVTFLVLLIILRGPRKLLAKTFLLALATVSVFVVGSKFTRPFMNPAIAFGWAYIYKSHNTWDHFYVYWISSYTGAILSAMLFRIIFPAPPLVQKKQKKA
AtSIP2;1	MGRIGLVVTDLVLSFMWIWAGVLVNILVHGVLGFSRTDPSGEIVRYLFSIISMFIFAYLQQATKGGLYNPLTALAAGVSGGFSSFIFSVFVRIPVEVIGSILAVKHIIHVFPEIGKGPKLNVAIHHGALTEGILTFFIVLLSMGLTRKIPGSFFMKTWIGSLAKLTLHILGSDLTGGCMNPAAVMGWAYARGEHITKEHLLVYWLGPVKATLLAVWFFKVVFKPLTEEQEKPKAKSEFCNVFFFYVANSTVSTSSIKSEI

## Sheet: OsAQPs-Proteins
OsPIP1;1	MEGKEEDVRLGANRYSERQPIGTAAQGAGDDKDYKEPPPAPLFEPGELKSWSFYRAGIAEFVATFLFLYITILTVMGVSKSSSKCATVGIQGIAWSFGGMIFALVYCTAGISGGHINPAVTFGLFLARKLSLTRAIFYIVMQCLGAICGAGVVKGFQQGLYMGNGGGANVVASGYTKGDGLGAEIVGTFILVYTVFSATDAKRNARDSHVPILAPLPIGFAVFLVHLATIPITGTGINPARSLGAAIIYNKDHAWNDHWIFWVGPFVGAALAAIYHQVIIRAIPFKSRS
OsPIP1;2	MEGKEEDVRLGANKFSERQPIGTAAQGSDDKDYKEPPPAPLFEPGELKSWSFYRAGIAEFMATFLFLYITVLTVMGVNNSTSKCATVGIQGIAWSFGGMIFALVYCTAGISGGHINPAVTFGLFLARKLSLTRALFYMVMQCLGAICGAGVVKGFQKGLYETTGGGANVVAPGYTKGDGLGAEIVGTFILVYTVFSATDAKRNARDSHVPILAPLPIGFAVFLVHLATIPITGTGINPARSLGAAIIYNRGHAWDDHWIFWVGPFIGAALAAIYHQVVIRAIPFKSRS
OsPIP1;3	MEGKEEDVRLGANRYTERQPIGTAAQGAEEKDYREPPAAPVFEVEELTSWSFYRAGIAEFVATFLFLYISILTVMGVNKSASKCATVGIQGIAWSFGGMIFALVYCTAGISGGHINPAVTFGLFLARKLSLTRAVFYMAMQCLGAICGAGVVKGFQRGLYMGSGGGANAVNPGYTKGDGLGAEIVGTFVLVYTVFSATDAKRNARDSHVPILAPLPIGFAVFLVHLATIPITGTGINPARSLGAAIVYNRAHAWHDHWIFWVGPFIGAALAAIYHVVVIRAIPFKSRD
OsPIP2;1	MGKDEVMESGGAAGEFAAKDYTDPPPAPLIDAAELGSWSLYRAVIAEFIATLLFLYITVATVIGYKHQTDASASGADAACGGVGVLGIAWAFGGMIFILVYCTAGISGGHINPAVTFGLFLARKVSLVRAILYIVAQCLGAICGVGLVKAFQSAYFNRYGGGANTLAAGYSKGTGLAAEIIGTFVLVYTVFSATDPKRNARDSHVPVLAPLPIGFAVFMVHLATIPITGTGINPARSIGAAVIFNNEKAWHNHWIFWVGPFVGAAIAAFYHQYILRAGAIKALGSFRSNA
OsPIP2;2	MAKDIEASAPEGGEFSAKDYTDPPPAPLIDVEELTKWSLYRAVIAEFIATLLFLYITVATVIGYKHQSDATVNTTDAACSGVGILGIAWAFGGMIFILVYCTAGISGGHINPAVTFGLFLARKVSLIRAVLYIIAQCLGAICGVGLVKGFQSSYYARYGGGANELSDGYSKGTGLGAEIIGTFVLVYTVFSATDPKRNARDSHIPVLAPLPIGFAVFMVHLATIPITGTGINPARSLGTAVIYNKDKAWDDQWIFWVGPLIGAAIAAAYHQYVALKCRYAYKMAASVQH
OsPIP2;3	MAKDIEAAAAAEGGEYMAKDYSDPPPAPLIDAEELTKWSLYRAVIAEFVATLLFLYITVATVIGYKHQSDPGANAADAACSGVGILGIAWAFGGMIFILVYCTAGVSGGHINPAVTFGLFLARKVSLVRAVLYIVAQSLGAICGVGLVKGFQSAFYVRYGGGANELSDGYSKGTGLAAEIIGTFVLVYTVFSATDPKRNARDSHVPVLAPLPIGFAVFMVHLATIPITGTGINPARSLGAAVIYNQHKAWHDHWIFWVGPLIGAAIAAAYHQYVLRASAAKLGSSSSFRG
OsPIP2;4a	MGKEVDVSTLEAGGARDYIDPPPAPLVDVDELGKWSLYRALIAEFVATLLFLYVTVATVIGYKHQTDAAVNGADAACGGVGVLGIAWAFGGMIFILVYCTAGVSGGHINPAVTLGLFLARKVSLVRALLYMAAQCLGAICGVALVKGFQSSLYDRYGGGANELAAGYSTGTGLAAEIIGTFVLVYTVFSATDPKRNARDSHVPVLAPLPIGFAVFMVHLATIPITGTGINPARSLGVAVVYNNNKAWSDQWIFWVGPFIGAAIAALYHQVILRASARGYGSFRSNA
OsPIP2;4b	MGKEVDVSTLEAGGVRDYEDPPPAPLVDADELCRWSLYRAVIAEFVATLLFLYVTVATVSLVRALLYMAAQCLGAICGVALVKGFQSGLYARHGGGANELAAGYSTGTGLAAEIIGTFVLVYTVFSATDPKRNARDSHVPVLAPLPIGFAVFMVHLATIPITGTGINPARSLGAAVMYNNSKAWSDQWIFWVGPFIGAAIAALYHQVILRASARGYGSFRSNA
OsPIP2;5	MGKEADVEAGGVRDYEDPPPAPLVDIDELGRWSLYRAVIAEFVATLLFLYVTVATVIGYKHQTDASASGDDAACGGVGVLGIAWAFGGMIFILVYCTAGISGGHINPAVTFGLFLARKVSLVRAILYIVAQCLGAVCGVALVKGFQSSFYDRYGGGANELAAGYSKGTGLAAEIIGTFVLVYTVFSATDPKRNARDSHVPVLAPLPIGFAVFMVHLATIPVTGTGINPARSLGAAVVYNNSKAWSDQWIFWVGPFIGAAIAALYHQIVLRASARGYGSFRSNA
OsPIP2;6	MSKEVSEEPEHVRPKDYTDPPPAPLFDVGELRLWSFYRALIAEFIATLLFLYITVATVIGYKVQSSADQCGGVGTLGIAWAFGGMIFILVYCTAGISGGHINPAVTFGLLLARKVSVIRAVMYIVAQCLGGIVGVGIVKGIMKHQYNANGGGANMVASGYSTGTALGAEIIGTFVLVYTVFSATDPKRNARDSHVPVLAPLPIGFAVFMVHLATIPITGTGINPARSIGAAVIYNQKKAWDDHVSCSPLTATLCSCVHFTKCLCLHMLNCSGSSGRGRSSERWRRRRITSTSSGRQPSRRWAPSGATPATELRWPWLLCCCWPGWTWSYRLHVRECV
OsPIP2;7	MASKEEVAVETVEGGAAAAKAPYWDPPPAPLLDTSELGKWSLYRALIAEFMATLIFLYVSIATVIGYKNQRATVDACTGVGYLGVAWSFGATIFVLVYCTGGVSGGHINPAVTLGLFFGRKLSLVRTVLYVVAQCLGAIAGAGIVKGIMKRPYDALGGGANTVSDGYSAAGALGAEIVGTFILVYTVFSATDPKRTARDSFIPVLVPLPIGFAVFVVHLATIPITGTGINPARSLGAAVLYNQHAAWKDHWIFWVGPVIGAFLAAAYHKLVLRGEAAKALSSFRSTSVTA
OsPIP2;8	MAAGSGSGSNPKDYQDPPPAPLVDTGELGKWSLYRAAIAEFTATLLLVCISVSTVIGEKRQSGEGGAGVLGIAWAFGGLIFVLVYCTAGISGGHMNPAVTFAMVLARRVSLPRAALYTMAQCVGAVCGAGLARAMHGGGQYARHGGGANELAAGYSAGAGVVAEMVGTFVLVYTVFSATDPKRKARDSHVPVLAPLPIGLAVLVVHLATIPITGTGINPARSLGPALVLGLGTTKAWSHLWIFWVGPFAGAAAAMIYHHYILRGAAAKAFASSSYRSPHF
OsTIP1;1	MPIRNIAVGSHQEVYHPGALKAALAEFISTLIFVFAGQGSGMAFSKLTGGGATTPAGLIAAAVAHAFALFVAVSVGANISGGHVNPAVTFGAFVGGNITLFRGLLYWIAQLLGSTVACFLLRFSTGGLATGTFGLTGVSVWEALVLEIVMTFGLVYTVYATAVDPKKGSLGTIAPIAIGFIVGANILVGGAFDGASMNPAVSFGPALVSWSWESQWVYWVGPLIGGGLAGVIYEVLFISHTHEQLPTTDY
OsTIP1;2	MPVSRIAVGAPGELSHPDTAKAAVAEFISMLIFVFAGSGSGMAFSKLTDGGGTTPSGLIAASLAHALALFVAVAVGANISGGHVNPAVTFGAFVGGNISLVKAVVYWVAQLLGSVVACLLLKIATGGAAVGAFSLSAGVGAWNAVVFEIVMTFGLVYTVYATAVDPKKGDLGVIAPIAIGFIVGANILAGGAFDGASMNPAVSFGPAVVTGVWDNHWVYWLGPFVGAAIAALIYDIIFIGQRPHDQLPTADY
OsTIP2;1	MVKLAFGSLGDSFSATSVKAYVAEFIATLLFVFAGVGSAIAYGQLTNGGALDPAGLVAIAIAHALALFVGVSVAANISGGHLNPAVTFGLAVGGHITILTGLFYWIAQLLGASIACLLLKFVTHGKAIPTHGVAGISELEGVVMEIVITFALVYTVYATAADPKKGSLGTIAPIAIGFIVGANILAAGPFSGGSMNPARSFGPAVAAGNFAGNWVYWVGPLIGGGLAGLVYGDVFIGSYQPVADQDYA
OsTIP2;2	MSGNIAFGRFDDSFSAASLKAYVAEFISTLVFVFAGVGSAIAYTKLTGGAPLDPAGLVAVAVCHGFGLFVAVAIGANISGGHVNPAVTFGLALGGQITILTGVFYWIAQLLGAIVGAVLVQFCTGVATPTHGLSGVGAFEGVVMEIIVTFGLVYTVYATAADPKKGSLGTIAPIAIGFIVGANILVAGPFSGGSMNPARSFGPAVASGDYTNIWIYWVGPLVGGGLAGLVYRYVYMCGDHAPVASSEF
OsTIP3;1	MSTAAARPGRRFTVGRSEDATHPDTIRAAISEFLATAIFVFAAEGSILSLGKLYQDMSTPGGLVAVSLAHALALAVAVAVAVNISGGHVNPAITFGALLGGRLSLIRALFYWLAQLLGAVVATLLLRLTTGGMRPPGFALASGVGDWHAVLLEATMTFGLMYAYYATVIDPKRGHVGTIAPLAVGFLLGANMLAGGPFDGAGMNPARVFGPALVGWRWRHHWVYWLGPFVGAGLAGLLYEYLVIPSADAAPHGGAHQPLAPEDY
OsTIP3;2	MLPGRHTPRRADAAAAAAAMEPLVPGATRAALSEFVATAVFVFAAEGSVYGLWKMYRDTGTLGGLLVVAVAHALALAAAVAVSRNASGGHVNPAVTFGVLVGRRISFARAALYWAAQLLGAVLAVLLLRLASGGMRPMGFTLGHRIHERHALLLEVVMTFGLVYTVYATAVDRRSGGGDIAPLAIGLVAGANILAGGPFDGAAMNPARAFGPALVGWNWRHHWVYWLGPLIGAGMAGALYEFVMAEQPEPPAAADTRLPVAAEDY
OsTIP4;1	MAKEVDPCDHGEVVDAGCVRAVLAELVLTFVFVFTGVAATMAAGVPEVAGAAMPMAALAGVAIATALAAGVLVTAGFHVSGGHLNPAVTVALLARGHITAFRSALYVAAQLLASSLACILLRYLTGGMATPVHTLGSGIGPMQGLVMEIILTFSLLFVVYATILDPRSSVPGFGPLLTGLIVGANTIAGGNFSGASMNPARSFGPALATGVWTHHWIYWLGPLIGGPLAGLVYESLFLVKRTHEPLLDNSF
OsTIP4;2	MPLLPMTKLELGHRGEAWEPGCLRAVAGELLFTFLFVFIGVASTITAGKAAGGAGEAAAVTAAAMAQALVVAVLATAGFHVSGGHLNPAVTLSLAVGGHITLFRSALYVAAQLAGSSLACLLLRCLTGGAATPVHALADGVGPVQGVAAEAVFTFTLLLVICATILDPRRAAPPGTGPLLTGLLVGANTVAGGALTGASMNPARSFGPALATGEWAHHWVYWVGPLAGGPLAVVAYELLFMDVEDAGGAHQPLPQE
OsTIP4;3	MAKLALGHHREATDPGCLRAVVAELLLTFLFVFSGVGSAMAAAKLGGGGDTIMGLTAVAAAHALVVAVMVSAGLHVSGGHINPAVTLGLAAGGHITLFRSALYAAAQLLGSSLACLLLAALTGGEEAVPVHAPAPGVGAARAVAMEAVLTFSLLFAVYATVVDRRRAVGALGPLLVGLVVGANILAGGPYSGASMNPARSFGPALAAGEWADHWIYWVGPLIGGPLAGLVYEGLFMGPPGHEPLPRNDGDF
OsTIP5;1	MANICANMKRCFSPPALRAYFAEFFSTFLFVFIAVGSTISARMLTPDETSDASSLMATAVAQAFGLFAAVFIAADVSGGHVNPAVTFAYAIGGHITVPSAIFYWASQMLGSTFACLVLHYISAGQAVPTTRIAVEMTGFGAGILEGVLTFMVVYTVHVAGDPRGGGFGGRKGPAATALGALVVGAVTGACVLAAGSLTGASMNPARSFGPAVVSGHYSNQAVYWAGPMVGAAVAALVHQALVFPTVPEPAPAPATNESARHGSVQTVVV
OsNIP1;1	MAGGDNNSQTTNGGSGHEQRAMEEGRKQEEFAADGQGCGLAFSVPFIQKIIAEIFGTYFLIFAGCGAVTINQSKNGQITFPGVAIVWGLAVMVMVYAVGHISGAHFNPAVTLAFATCRRFPWRQVPAYAAAQMLGATLAAGTLRLMFGGRHEHFPGTLPAGSDVQSLVLEFIITFYLMFVISGVATDNRAIGELAGLAVGATILLNVLIAGPISGASMNPARSLGPAMIGGEYRSIWVYIVGPVAGAVAGAWAYNIIRFTNKPLREITKSGSFLKSMNRMNSST
OsNIP1;2	MAVVVDGVSPPWSKEAVVHLLSEFSSPDHVSISVTAHQPCLLKNGLEETETTRASGLPNLRNDSINRVLIESLVERLIALPLSQGERWLGERMEQQQEPWKKGKTARRSNFQRTLIADTDPWCMCMNKNLLILAEILGTYFMIFAGCGAVVVNQSTGGAVTFPGICAVWGLVVMVLVYTVSHISGAHFNPAVTVAFATCGRFRWKQVPSYVVAQVLGSTMASLTLRVVFGGGGGGARGEHLFFGTTPAGSMAQAAALEFVISFFLMFVVSGVATDNRAIGELAGLAVGATVAVNVLFAGPVTGASMNPARSLGPAMVAGRYGGVWVYVAAPVSGTVCGAWAYNLLRFTDKPLRDIANTASFLRRSSRRS
OsNIP1;3	MAGGEHGVNGQHEETRAMEEGSRDHQARCENSEQDGGSKSSSNNHPMFSVQFAQKVIAEILGTFFLIFAGCAAVAVNKRTGGTVTFPGICITWGLAVMVMVYSVGHISGAHLNPAVTLAFATCGRFPWRRVPAYAAAQVAGSAAASAALRALFGGAPEHFFGTAPAGSDVQSLAMEFIITFYLMFVVSGVATDNRAIGELAGLAVGATVLVNVLFAGPISGASMNPARTIGPAIILGRYTGIWVYIAGPVFGAVAGAWAYNLIRFTDKPLREITMTASFIRSTRRN
OsNIP1;4	MARREVDDSYTNGSVVEVVSIEEGSKMDKEDDHQNPQAPDGGDVVVCGMPMSFTFLQMLLAEFLATFFLMFAGLGAITVEEKKGAVTFPGVAVAWGAAVMAMVYAVGHVSGAHLNPAVTLGFAVAGRFPWRRAPAYALAQTAAATAASVVLRLMFGGRHAPVPATLPGGAHAQSLVIEFVITFYLMFVIMAVATDDQAVGHMAGVAVGGTIMLNVLFAGPVSGASMNPARSIGPALVGSKYTALWVYILGPFAGAAAGAWAYSLIRLTGDRTD
OsNIP2;1	MASNNSRTNSRANYSNEIHDLSTVQNGTMPTMYYGEKAIADFFPPHLLKKVVSEVVATFLLVFMTCGAAGISGSDLSRISQLGQSIAGGLIVTVMIYAVGHISGAHMNPAVTLAFAVFRHFPWIQVPFYWAAQFTGAICASFVLKAVIHPVDVIGTTTPVGPHWHSLVVEVIVTFNMMFVTLAVATDTRAVGELAGLAVGSAVCITSIFAGAISGGSMNPARTLGPALASNKFDGLWIYFLGPVMGTLSGAWTYTFIRFEDTPKEGSSQKLSSFKLRRLRSQQSIAADDVDEMENIQV
OsNIP2;2	MASTTAPSRTNSRVNYSNEIHDLSTVQSVSAVPSVYYPEKSFADIFPPNLLKKVISEVVATFLLVFVTCGAASIYGEDMKRISQLGQSVVGGLIVTVMIYATGHISGAHMNPAVTLSFAFFRHFPWIQVPFYWAAQFTGAMCAAFVLRAVLYPIEVLGTTTPTGPHWHALVIEIVVTFNMMFVTCAVATDSRAVGELAGLAVGSAVCITSIFAGPVSGGSMNPARTLAPAVASNVYTGLWIYFLGPVVGTLSGAWVYTYIRFEEAPAAAGGAAPQKLSSFKLRRLQSQSMAADEFDNV
OsNIP3;1	MEMAAPNGGGAAGMSSPVNGASAPATPGTPAPLFAGPRVDSLSYERKSMPRCKCLPAAVAEAWAPSAHGCVVEIPAPDVSLTRKLGAEFVGTFILIFFATAAPIVNQKYGGAISPFGNAACAGLAVTTIILSTGHISGAHLNPSLTIAFAALRHFPWLQVPAYVAVQVLGSICAGFALKGVFHPFLSGGVTVPDPTISTAQAFFTEFIITFNLLFVVTAVATDTRAVGELAGIAVGAAVTLNILIAGPTTGGSMNPVRTLGPAVAAGNYRQLWIYLIAPTLGAVAGAGVYTAVKLRDENGETPRPQRSFRR
OsNIP3;2	MEGGKMSSMGMDAASASVTVPPMQMQAGDQSNRIAIIISPRAGSSKILPFELVNGAANAGSQRHADPAESTPEAHHHLWHPVDLPKIKPPVPLVKKVGAEFFGTFTLIFTVLSTIIMDEQHKGVESLLGIATSAGLAVTVLVLSLIHISGCHLNPAVSIAMTVFGHLPPAHLLPYIAAQILGSITASFAVKGMYHPVNPGIVTVPKVGTVEAFFLEFVTTFVLLFIITALATDPNAVKELIAVAVGATIMMNALVAGPSTGASMNPARTLGPAIATGRYTQIWVYLVATPLGAVAGEGFYFAIKL
OsNIP3;3	MEGHKSGMEAVAVAIPPLHTGESNHRIDSNVSSQCHADPAELSDETQQQSLWHLGLRKIIPSSVPLLKKVSAEFFGTFILIFTVLSTIIMDEQHKSIETLLGIATSAGLAVTVLVLSLIHISGCHLNPAISIAMAVFGHLPSAHLLPYISSQILGAVAASFAVKGLYHPVNPGIVTVPNVGTVEAFFVEFIITFFLLFIITALATDPNAVKELIAVAVGATVMMNILVAGPSTGASMNPARTIGAAIATGRYTQIWVYLVATPLGAIAGTGAYVAIKL
OsNIP4;1	MTTDHAGKKVDVVVVGNVDGEHVGVEQARHDLHEEAAAAAAADHHATRGLAIGFLIREVMVEGLASFLVVFWSCVAALMQEMYGTLTFPMVCLVVAMTVAFVLSWLGPAHFNPAVTITFAAYRRFPVWPKLPLYVAAQLAGSLLACLSVNAVMRPRHDHFYGTAPVVVHGTRLPFLMEFLASAVLMIVIATVATDGTAGKTVGGIAIGAAVGGLGLVIGPVSGGSMNPARTLGPAIVLGRYDGVWIYVVAPVAGMLVGALCNRAVRLSHRIVAFLCGTSVGIAGSP
OsSIP1;1	MAVAAVRAAAADAAVTFLWVLCVSTLGASTAAVTSYLRIHEGIHYALLVTVSLLSVLLFAFNLLCDALGGASFNPTALAAFHAAGLSSPRHSSLFPLALRFPAQAAGAVGGAMAISELMPEQYKHMLGGPSLKVDLHTGAAAELVLTFVITLAVLWIIVKGPRNPIVKTWMLSISTVCLVLTGAAYTGPSMNPANAFGWAYVNNRHNTWEQFYVYWICPFVGAVLAAWVFRAVFPPPAPKPKAKKA
OsSIP2;1	MSPAPPPSRGRIRPWLVVGDLVVAAMWVCAGALVKLAVYGVLGLGGRPEADAVKVALSLVYMFFFAWLEGFTGGASYNPLTVLAGALASRAGPSLYLFAAFVRMPAQVFGSILGVKLIRAALPKVGKGAPLSVGVHHGALAEGLATFMVVIVSVTLKKKEMKGFFMKTWISSIWKMTFHLLSSDITGGVMNPASAFAWAYARGDHTTFDHLLVYWLAPLQATLLGVWVVTLLTKPKKIEEEADESKTKKE

## Sheet: CrAQPs-Proteins
CrPIP1;1	MEGKEEDVRVGANRYRERQPIGTAAQAQDDAKDYKEPPSAPLFEPGELSSWSFYRAGIAEFVATFLFLYITVLTVMGVAKSNSKCSTVGIQGIAWAFGGMIFALVYCTAGISGGHINPAVTFGLFLARKLSLTRAIFYIIMQCLGAICGAGVVKGFQPHQYERLGGGANTLSKGYSKSTGLGAEIVGTFVLVYTVFSATDAKRNARDSHVPILAPLPIGFAVFLVHLATIPITGTGINPARSLGAALIYNKDQAWDNHWIFWVGPFIGAALAALYHQIVIRAIPFRSK
CrPIP1;2	MERNDEDERVGANRYGERQPIGTGAQSQDGKEYREAAPAPLFEARELTSWSFYRAGIAEFVATFLFLYITVLTLMGVAKSPTKCSTVGVQGIAWSFGGMIFALVYCTAGISGGHINPAVTFGLFLARKLSLTRTVFYMIMQCLGAICGAAVVKGFQSKQYERLGGAANTLNKGYSKGDGLGAEIVGTFILVYTVFSATDAKRNARDSHVPILAPLPIGFAVFLVHLATIPITGTGINPARSLGAAIVYNKDQAWDGHWIFWVGPFIGAALAALYHQIVMRAIPFKSK
CrPIP1;3	MEKEEDVKVGANKFSERQPLGTAAQSDKDYKEPPAAPLFEPGELKSWSFYRAGIAEFVATFLFLYITILTVMGVNNSSSKCSSVGIQGIAWAFGGMIFALVYCTAGISGGHINPAVTFGLFLARKLSLTRAVFYIVMQCLGAICGAGVVKGFEGNARYELFKGGANFVNPGYTKGDGLGAEIVGTFILVYTVFSATDAKRNARDSHVPILAPLPIGFAVFLVHLATIPITGTGINPARSLGAAIIFNRDLAWDDHWIFWVGPFVGAALAALYHQIVIRAIPFKTRA
CrPIP1;4	MERDEDVKVGANKYSERQALGTGAQGEKDYKEAPPAPLFEPGELKSWSFYRAGIAEFVATFLFLYITVLTVMGVNRSPSKCSSVGIQGIAWAFGGMIFALVYCTAGISGGHINPAVTFGLFLARKLSLTRAVFYIVMQCLGAICGAGVVKGFEGNGRYEMYKGGANFVSHGYTKGDGLGAEILGTFILVYTVFSATDAKRNARDSHVPILAPLPIGFAVFLVHLATIPITGTGINPARSLGAAIIYNRDHAWDDHVLDFLGWTLHWSCPCCFISPDRDPSNSFQDKGLILLRYELSTRPALFVASYVISICFTPSCV
CrPIP1;5	MEGKEQDVSLGANKFPERQPIGTAAQSQDDGKDYQEPPPAPLFEPSELTSWSFYRAGIAEFVATFLFLYITILTVMGVNRSPKCQSVGIQGIAWAFGGMIFALVYCTAGISGGHINPAVTFGLFLARKLSLTRALFYMVMQVLGAICGAGVVKGFEGKTRYGLYKGGANFVAPGYTKGDGLGAEIVGTFILVYTVFSATDAKRSARDSHVPILAPLPIGFAVFLVHLATIPITGTGINPARSLGASIIFNKDLGWDDHWIFWVGPFIGAALAALYHQVVIRAIPFKSK
CrPIP2;1	MSKEVSEEGQQRKDYVDPPPAPLIDLAEIKLWSFYRALIAEFIATLLFLYVTVATVIGHKKQSGPCDGVGLLGIAWSFGGMIFVLVYCTAGISAQCLGAICGVGLVKAFMKHPYNSLGGGANSVSSGYNKGTALGAEIIGTFVLVYTVFSATDPKRNARDSHVPVLAPLPIGFAVFMVHLATIPITGTGINPARSFGAAVIYNNSKVWDDHWIFWVGPFVGALAAAAYHQYILRAAAIKALGSFRSNPTN
CrPIP2;2	MAKEVEVQEQGEYSAKDYQDPPPTPLFDPEELTKWSFYRALIAEFIATLLFLYVTVLTIIGYKSQTDSTKGGTECDGVGILGIAWAFGGMIFILVYCTAGISGGHINPAVTFGLFLGRKVSLIRALLYMVAQCAGAICGTGLAKGFQKAYYNRYGGGANSVADGYNKGTALGAEIIGTFVLVYTVFSATDPKRNARDSHVPVLAPLPIGFAVFMVHLATIPITGTGINPARSFGAAVIYNKEKIWDDQWIFWVGPIVGAAVAAIYHQYILRASAIKALGSFRSNA
CrPIP2;3	MAKDVEQVTEQQGEYSAKDYHDPPPAPLIDVEELTKWSLYRAAIAEFIATLLFLYITVLTIIGYMRQSDTTIQGNTECDGVGILGIAWAFGGMIFILVYCTAGISGGHINPAVTFGLFVGRKVSLIRALLYMIAQCAGAICGAGLAKGFQKAYYNRYGGGVNLVSDGYNKGTALGAEIIGTFVLVYTVFSATDPKRSARDSHVPVLAPLPIGFAVFMVHLATIPVTGTGINPARSFGPAVIFNKDKAWDDQWIYWVGPFVGAAVAAFYHQYILRAAAIKALGSFRSNAS
CrPIP2;4	MAKHDVEIAERGSFSAKDYHDPPPAPLIDAEELTKWSFYRALIAEFIATLLFLYITVLTVIGYKSQSDLKAGGDVCGGVGILGIAWAFGGMIFILVYCTAGISGGHINPAVTFGLFLARKVSLIRAIMYMVAQCLGAICGVGLVKAFQKAYYNRYGGGANELSDGYSTGVGLGAEIIGTFVLVYTVFSATDPKRSARDSHVPVLAPLPIGFAVFMVHLATIPVTGTGINPARSLGAAVIYNQEKAWDDQWIFWVGPFAGAAIAAFYHQFILRAGAAKALGSFRSNPTV
CrPIP2;5	MAKDVEVTERGSFSGKDYHDPPPAPLIDAEELTKWSFYRALIAEFIATLLFLYITVLTVIGYKHQSDVNDKGDVCGGVGILGIAWAFGGMIFILVYCTAGISGGHINPAVTFGLFLARKVSLIRAIMYIIAQCLGAICGVGLVKAFQKSYYNRYGGGANSLADGYSTGVGLGAEIIGTFVLVYTVFSATDPKRSARDSHVPVLAPLPIGFAVFMVHLATIPVTGTGINPARSFGAAVIYNHDKPWDDHWIFWVGPFAGAAIAAFYHQFILRAGAVKALGSFRSNPHV
CrPIP2;6	MAKDMESAAQNALPHKDYHDPPPAPLFDAAELRSWSLYRALIAEFVATLLFLYVTVLTVIGYKHQTDGGDPCNGVGILGIAWAFGGMIFVLVYCTAGISGGHINPAVTWGLFLARKVSLVRALSYMVVQCLGAICGVGLVKAFQKSYYNRYAGGANMLSDGYNKGTGLGAEIIGTFLLVYTVFSATDPKRNARDSHVPVLAPLPIGFAVFMVHLATIPITGTGINPARSFGAAVIYNNEKAWDDQWIFWVGPFIGATIAAIYHQFVLRAQAAKALGSFRSSSNL
CrTIP1;1	MALYRIAIGSPGEAGQPDALRAAFAEFFSMIIFVFAGEGSGMAYNKLTNNGPATPSGVIAASLSHAFGLFVAVSVGANISGGHVNPAVTFGAFLGGNITLLRSILYWIAQLLGSVVACILLKSATGGMETSPFSLSSGVSVWNALVLEIVMTFGLVYTVYATALDPKKGNVGIIAPIAIGFIVGANILAGAAFDGASMNPAVSFGPAVVSWSWTHHWVCWVGPFIGSAIAAIIYDNMFIGDDGHEHLSSSDF
CrTIP1;2	MPISRISIGNPSELGQADALKAALAEFISMLIFVFAGEGSGMAYNKLTNNGSATPAGVVAASLSHAFALFVAVSVGANISGGHVNPAVTFGAFIGGHITLLRGILYWIAQLLGSVVACLLLKLATAGMETSAFSLSSGVGAANALVFEIVMTFGLVYTVYATAVDPKKGNIGIIAPIAIGFIVGANILAGGAFDGASMNPAVSFGPAVVSWTWANHWVYWVGPLIGSAIAALVYEIFFITPSSYEQLPVADY
CrTIP1;3	MPISKIAIGHSSELTQADALKAALAEFISMLIFVFAGEGSGMAYNKLTKNGSATPAGLVAASLSHAFALFVAVSVGANISGGHVNPAVTFGAFIGGHITLFRTILYWIAQLLGSIVACLLLKVATGGLETSAFALSSGVGAGNAFVFEIVMTFGLVYTVYATAVDPKKGDLGIIAPIAIGFIVGANILAGGAFDGASMNPAVSFGPAVVSWTWDNHWVYWAGPFIGSAIAALVYEIFFINQNTHDHLPTTDY
CrTIP1;4	MPIRNIAVGRPEEATHPDTLKAALAEFISTLIFVFAGSGSGIAYNKLTDNGAATPAGLISAAIAHAFALFVAVSVGANISGGHVNPAVTFGAFIGGNISFLRGIVYIIAQLLGSIVASLLLLFVTGLPVPAFGLSAGVGVGNALVLEIVMTFGLVYTVYATAIDPKKGNLGIIAPIAIGFIVGANILLGGAFDGASMNPAVSFGPSVVSWSWNNHWIYWVGPLIGGGLAGLIYEVIFISHTHEQLPTTDY
CrTIP2;1	MVKIALGTFDDSFSIASLKAYLAEFIATLLFVFAGVGSAIAYNELTSDAALDAPGLVAVAVAHAFALFVGVAIAANISGGHLNPAVTFGLAIGGNITLLTGFLYWIAQLLGSIVACLLLNFVTAKSVPTHGVAAGVNVFAGLVFEIVVTFGLVYTVYATAADPKKGSLGIIAPIAIGFIVGANILAAGPFSGGSMNPARSFGPAVVSGNFVDNWIYWIGPLIGGGLAGLIYGDIFIGSYTPAPPSDTYP
CrTIP2;2	MAGIAFGRFDDSFSLSSIKAYIAEFISTLLFVFAGVGSAIAYGKLTSDAALDPAGLVAVAICHGFALFVAVSVGANISGGHVNPAVTFGLALGGQITILTGIFYWIAQLVGSIVACFLLHFVTGGLTTPIHSVAAGVGAVEGVVTEIIITFGLVYTVYATAADPKKGSLGTIAPIAIGFIVGANILAAGPFSGGSMNPARSFGPAVVSGNFHDNWIYWVGPLIGGGLAGLIYGNVFIRSDHAPLSSEF
CrTIP3;1	MSTRRYAFGRADEATHPDSMRATLAEFASTFIFVFAGEGSGLALVKIYQDSAFSAGELLAVALAHAFALFAAVSSSMHVSGGHVNPAVTFGALLGGRISVVLAIYYWIAQLLGAIVAALILRLVTNNMRPSGFHLAPGVGAAHMLILEIVMTFGLMYTIYGTAIDPKRGSVSNIAPLAIGLIVGANILVGGPFDGACMNPALAFGPSLVGWRWHYHWIFWVGPLIGAALAAIIYEYVVIPTEPPHQHQPLAPEDY
CrTIP3;2	MATNRRYAIGRLDEANNPDSMRATLAEFLSTCIFVFVGEGSALALSQIYKDTGTSAGELVVVALAHAFALFAAISATMHVSGGHVNPAVTFGSLLAGKISVLRAVYYWVAQLLGSVVAALLLRLVTNNMRPQGFGVSVGVGAFHSLILEIALTFGLMYTVYATALDPKRGTVGSISPLAIGLVVGANILVGGPFDGACMNPARAFGPALVGWRWHYHWIFWVGPLIGAALAALLYEYVMVQTEPPHAHHQPLAPEDY
CrTIP4;1	MRHLSVCIMWESSNIHCLCNGESASAMAKIALGTTREVTQPDCIQALVVEFIATFLFVFVGVGASMAVDKFVGDALVGLFAVAVAHALVVAVMISSAHISGGHLNPSVTLGLLASGHITLFRSILYWIDQLIASAAASFLLYYLSGGQNTPVHTLASGVGYGQGVIWEIVLTFGLLFTVYATMVDPKKGALAGIGPTLVGFVVGANILAGGAFSAASMNPARSFGPALVSGNWTDHWVYWVGPLIGGGLAGFIYETFFIDRSHVLLFPDAES
CrTIP5;1	MAPSSVTVTSRFHESVTRNALRSYLSEFVCTFFFVFLVVGSQMSSRKLMPDASLNPTSLVVVAMANAFALCSVLYVAWDISGGHVNPAVTFAMAVGGHISVPTALFYWVAQLIASVMACLVLRVIVVGMHVPTYTIAEEMTGFGASVLEGILTFVLVYTVYAARDPRRGPMSSTGPLAVGLIAGANVLAAGPFSGGSMNPACAFGSAAIAGSFRNQAVYWVGPLIGASIAGLLYDNALFPSHTTHSVTQGLAV
CrNIP1;1	MGDNSASNGGHEVVLNVNDDASKKTEDSAIEHSVPLLQKLAAEAAGTYFLIFAGCASVVVNLGNDKVLTFPGISIVWGLTVMVLVYSLGHISGAHFNPAVTIAHASTKRFPFKQVPAYIIAQVIGSLLASGTLRLIFNGKSNYFPGTVPAGSDLQAFVIEFIITLFLMLVISGVATDNRAIGELAGLVVGSTVLLNVLIAGPITGASMNPARSLGPTIVYNEYRGIWIYLVSPILGAVAGTWIYNFLRYTTKPVPEITKSASFLKGPE
CrNIP1;2	MGDNSASNGSDEVVLNVNGDVSVKCEDSVPLLQKLVAEVVGTYFLIFAGCGSVVVNLSKDKMVTQPGISIVWGLTVMVLAYSLGHISGAHFNPAVTIAHASTKRFPFKQVPGYIVAQVVGSTLASGSLRLIFNGKNDHFAGTLPAGSDLQAFVLEFIITFYLMFVISGVATDNRAIGELAGLAIGSTVLLNVMFAGPITGASMNPARSLGPAIVHNEYRGLWIYLVSPTVGAVAGTWAYNFIRYTNKPVREITNSASFLKGSPPEGGSH
CrNIP1;3	MKSTIRKIGDRGESVVGNIQTLSYISQLFPSTLWLMADNSARSETQEVVLNVPKDPSKTYERSDSYVSVPFLQKLVAEIVGTYFLIFAGCASVVVNKNNDNVVTLPGISIVWGLAVMVLVYSVGHISGAHFNPAVTIAFASTRRFPLMQVPAYVAAQLLGATLASGTLKLIFNGSHDQFSGTLPAGSNLQAFVIEFIITFYLMFVISGVATDNRAIGELAGLAIGSTILLNVMIAGPITGASMNPVRSLGPAFVHTEYRGIWIYLLSPVVGAVAGAWVYNIIRYTDKPLREITKSASFLKGSGRCA
CrNIP2;1	MANKAEGIQEEEMSRVEVGVNRCPFNFSGLPSCCSSNYVVTLTQKVIAEFIGTYFVVFAGCGSVAVNKIYGSVTFPGICITWGLIVMVMVYSVGHISGGHFNPAVTITWAIFRRFSYKEVPIYIVAQLLGSILASGTLALMLDVTPKAYFGTVPVGSIGQSLAAEIIITFLLMFVISAVSTDDRAVGDFAGVTVGMTIMLNVFVAGPVSGASMNPARSIGPALIKHVYKGLWVYIVGPIIGAIAGAFVYNFLRSTEEPHSE
CrNIP2;2	MAENQITGMEEGGVQSQKDSSFRDSPDVVQIIQKVVAEVIGTYFFIFAGCCSLVLNKVEESKGSITFPGICVVWGVTLMILVYSLGHISGAHFNPAVTVSLAIYRQFPLKQVPLYIIAQIVGSVLASGTLDLLFDVDDNSYFGTVPTGSYTRSLVFEILTTFLLLFVISSVTTDNGAVGELAGVAIGMTILIDLFIAGNVSGASMNPARSLGPALVMHIYTGFWIYIVGPFLGGILGVTAYNLIRFNEKPLSSIRK
CrNIP3;1	METNEEIPSMPTTPGTPGAPLFGAFNDNHNNKKSLLKNCKCFSVEEWTIEDGALPAVSCSLPLSPPPVSLARKVGAEFIGTFILMFSGTAAAIVNQKTPGSETLIGCAASTGLAVMIVILATGHISGAHLNPAVTISFAALKHFPWKHVPMYIGAQVLASICSAFALKGIFHPFMSGGVTVPSGGYGQAFALEFIIGFNLMFVVTAVATDTRAVGELAGIAVGATVMLNILIAGPATGGSMNPVRTLGPAIAANNYKAIWVYLVAPVLGALGGAGTYTAVKLPEEDDNAKARASISFRR
CrNIP3;2	MDNAEIPSVPSTPATPGTPGAPLFGGFKSERTGNGIGKKPSLLKSCKCFSVEEWTLEDGTLPKLSCSLPPPPVPLAKKVGAEFIGTFILMFAAIGTAIVNQKTHGSETLVGCAAANGLAVMIIISSTGHICGAHLNPAVTISFAALKHFPWKNVPVYIGTQLLASICAAFALKEVFDPFMSGGVTVPSVGYGQAFAIEFTVSFILMFVVTAVATDTRAVGELAGIAVGATVMLNILIAGPATGSSMNPVRTLGPAIATNNYRGIWVYLTAPILGTLCGAGAYTVVKLPDQRFNSQAKAPSAPSTFTR
CrNIP3;3	MPDEEIGTPTAASVPATPDTPGGPLFTSLRVDSLSHERDSFAKARCKCLPTKGHTCFTDFSVGVPIPNVSLTQKIGAEFVGTFILIFASTAGPIVNNKYNGAEGLLGNGATAGLTVMFIILSIGHISGAHLNPALTIAFAAFRHFPWVHVPAYVAAQVSASICAGFALKAVYHPFLSGGVTIPSVTIGQAFATEFIITFNLLFVVTAVATDTRAVGELAGIAVGATVLLNILISGPTSGGSMNPVRTLGPAVAAGNFKHIWIYLVAPTLGGLAGAGVYTLVKLRDKDGEPPRQARSFRR
CrNIP4;1	MAEVVGTFILMFCVCGINASTQFQNGAVGLLEYAATAGLTVIVIIFSIGPISCAHVNPAVTIAFATIGQFPWFKVPVYIIAQTVGSMSATYIGSLVYGIKSDVMMTQPLQGCNSAFWVEVIATFIIMFLIAALTFESQSVGHLSGLVAGIAIGLAVLITGPVSGGSMNPARSLGPAIVSWKFKDIWIYILAPCVGAVAGALMFHVLRLREQHCSPLSSQNIRDVGRPIPLCSKYNDKSTFTQIVVASSIGLILAATMHYNVKRMRDRKIVPRLRFSKTRQIPKLEKFSHYVARQMGFKDKKSCPLLCKLASEYIRKSEGCEDDIYAFFENEPNVDSLFVKLVEEFERCILSYFAFHWSHGDVLISQVLSSEKPKKKLKHIVMAATREQRFERVTKNLKV…
CrNIP5;1	MEGTSQNLCSYVADTIELQTPTTPQPSSSPLAKFAECYPPGFSRKVLAEVIGTYLLVFVGSGSAGLANIDANKVSKLAASLAAGCIVTVMIYSIGHISGAHMNPAVSLAFAAVRHFPWPQVPFYIAAQLIGAISAAYTLRELFQPSKQIGETQPAGSHIQALIMEMVTTFTMVFISMAVATDTKATGTLSGVAVGCSVSIASIVAGPMTGGSMNPARTLGPAIAISSYKGLWVYFVGPITGALLGAWSYNVIKETDQPGFSFSLLSLSFKLRQNNSGTEQLVKNSHRCSV
CrNIP6;1	MPYSIILLQEYESAGTLSSIFGHSSAMMADSLSVNVDSSPKLELSTEQAHKTNHEAEHSPSKFQKAIAELVGTYIIIFAGCGAALVNEKLQLTIVGIAIVSGLALTVALYSVGHISGGHFNPAVTIALAAVRKVQLKLLMGATLATLTLKVLYHDKVDIGVTVLTYLSSTSDLEAIVWESIITAILMLTICGVATDHRGRKELAGVAIGIAVLINIIIAGPITGASMNPARSLGPAIVSGDYRNIWVYIIGPILGAVFASTLYKLLDVTKPAKTVPFHWCNHNHLPF
CrSIP1;1	MFGAIKAAIGDAVLTFLWVFCSSTLGIAAGAIIRALDVQHLSYNGFPYPSFLVTTALVFILVFFFTVIGEAIGGASFNPTGTASFYAVGLGSDTLFSMALRFPAQALGAAGGALAIMEVIPTEYKHMIGGPSLKVDLHTGAVAEGLLTFIITFAMLFIILKGPRSELLKTWLMATATVILVMAGSAYTGPSMNPANAFGWAYLNNWHNTWDQFYVYWICPFTGAILAAWLFRAIFPPPPPQVKQKKA
CrSIP1;2	MGVIKSAIGDAILTSIWVFIISTLRIVTTEVAIFLGLQPFSFAGLVITTIFNTLYVLTISFIGRMLGGASFNPSTTISFYTAGLRPDSSLVSMAIRFPAQAAGGALGAKTLLQVMPTHYKHMLKGPFLKVDLHTGAIAEGLLTFTHNLAILFIMLKGPKNPFLKVYLLSVATVALVIPGSGFTGPSMNPANAFGWAYTNNKHNTLEQFYVYWICPFIGASSAALIYRFLFMSPTKQKKA
CrSIP1;3	MQIPAFDTYQRFIGMTLGGASFNPSTNISFYIARLRPNSSLASMAIRFPSQAAGGAIAAKVLLLVIPTQYKHMLKGPFLKVYLLSVAIVALVILGSGFTGPAMNLGFAFGWAYMNNKHNTREHFYVYWICPFVGSTLAAFVYRFLFISPTNKKKA
CrSIP2;1	MGRIKLLLFDFVLSFMWVSSSVLIRIFVFKFLGFRHDHLGEIVKTAFSVANMFFFAFLVRLTRGAAHNPLTVLAGAISGDFNNFLYCVAARIPSQVLGSIVGVKLLIYTIPEVGRGPSLNIDIHRGALTEGLLTFAIVTISLGLATKIRENFFMKTWISSLSKLTLHILGSDLTGGCMNPASVMGWAYARGDHITKEHILVYWLAPIEATILAVWTFKLLVQPVKEDRTASKRKSD
CrXIP1;1	MDFADSPVVDIDKQFPRPVQNHEANKKFLDSKLLDSIGAHEIFTKEMWKAALTELTATTFLVFTLTTSIIACLDSNEVDPKLLVPFAVFIIAFLFLIVTVPLSGGHMSPVFTIIAALKGVVTLARALIYILAQCIGSIIGFLILNSVMDPKLADTYSLGGCAISGKDVNSGIKPMDALILEFTCTFVVLFVGVTLAFDKKRSKDLGLPIVCLVVAGAMALAVFVSITVTGRAGYAGVGLNPARCLGPALFRGGPLWEGVVWVDGQYDVLKLAFGSSGTIHNNNGVTNDQTECQAQV
