# Supplementary material for: Molecular characterization of Tetragonia tetragonoides (Pall.) aquaporin (AQP) members and their roles in the response to combined high salinity-alkalinity-drought and heat stress
Source: Research Square preprint supplement (doi:10.21203/rs.3.rs-7136705/v1), 2025-07-30
Supplement: Supplementary file 4 [file bc5bb902f95de3287ec2e97a.docx]

**Molecular characterization of *Tetragonia tetragonoides* (Pall.) aquaporin (AQP) members and their roles in the response to combined high salinity–alkalinity–drought and heat stress**

**Lisha Cao1, 2, 3, Fuying Xie1, 2, 3, Lihua Chen1, 2, 3, Zhengfeng Wang1, 5,**

**Mei Zhang1, 3, *, Shuguang Jian1, 2, ***

**1** Guangdong Provincial Key Laboratory of Applied Botany, South China Botanical Garden, Chinese Academy of Sciences, Guangzhou 510650, China.

**2** University of the Chinese Academy of Sciences, Beijing 100039, China.

**3** Center of Economic Botany, Core Botanical Gardens, Chinese Academy of Sciences, Guangzhou, 510650, China.

**4** Southern Marine Science and Engineering Guangdong Laboratory (Guangzhou), Guangzhou, China

***** Correspondence and requests for materials should be addressed to Mei Zhang (zhangmei@scbg.ac.cn) and Shuguang Jian (jiansg@scbg.ac.cn).


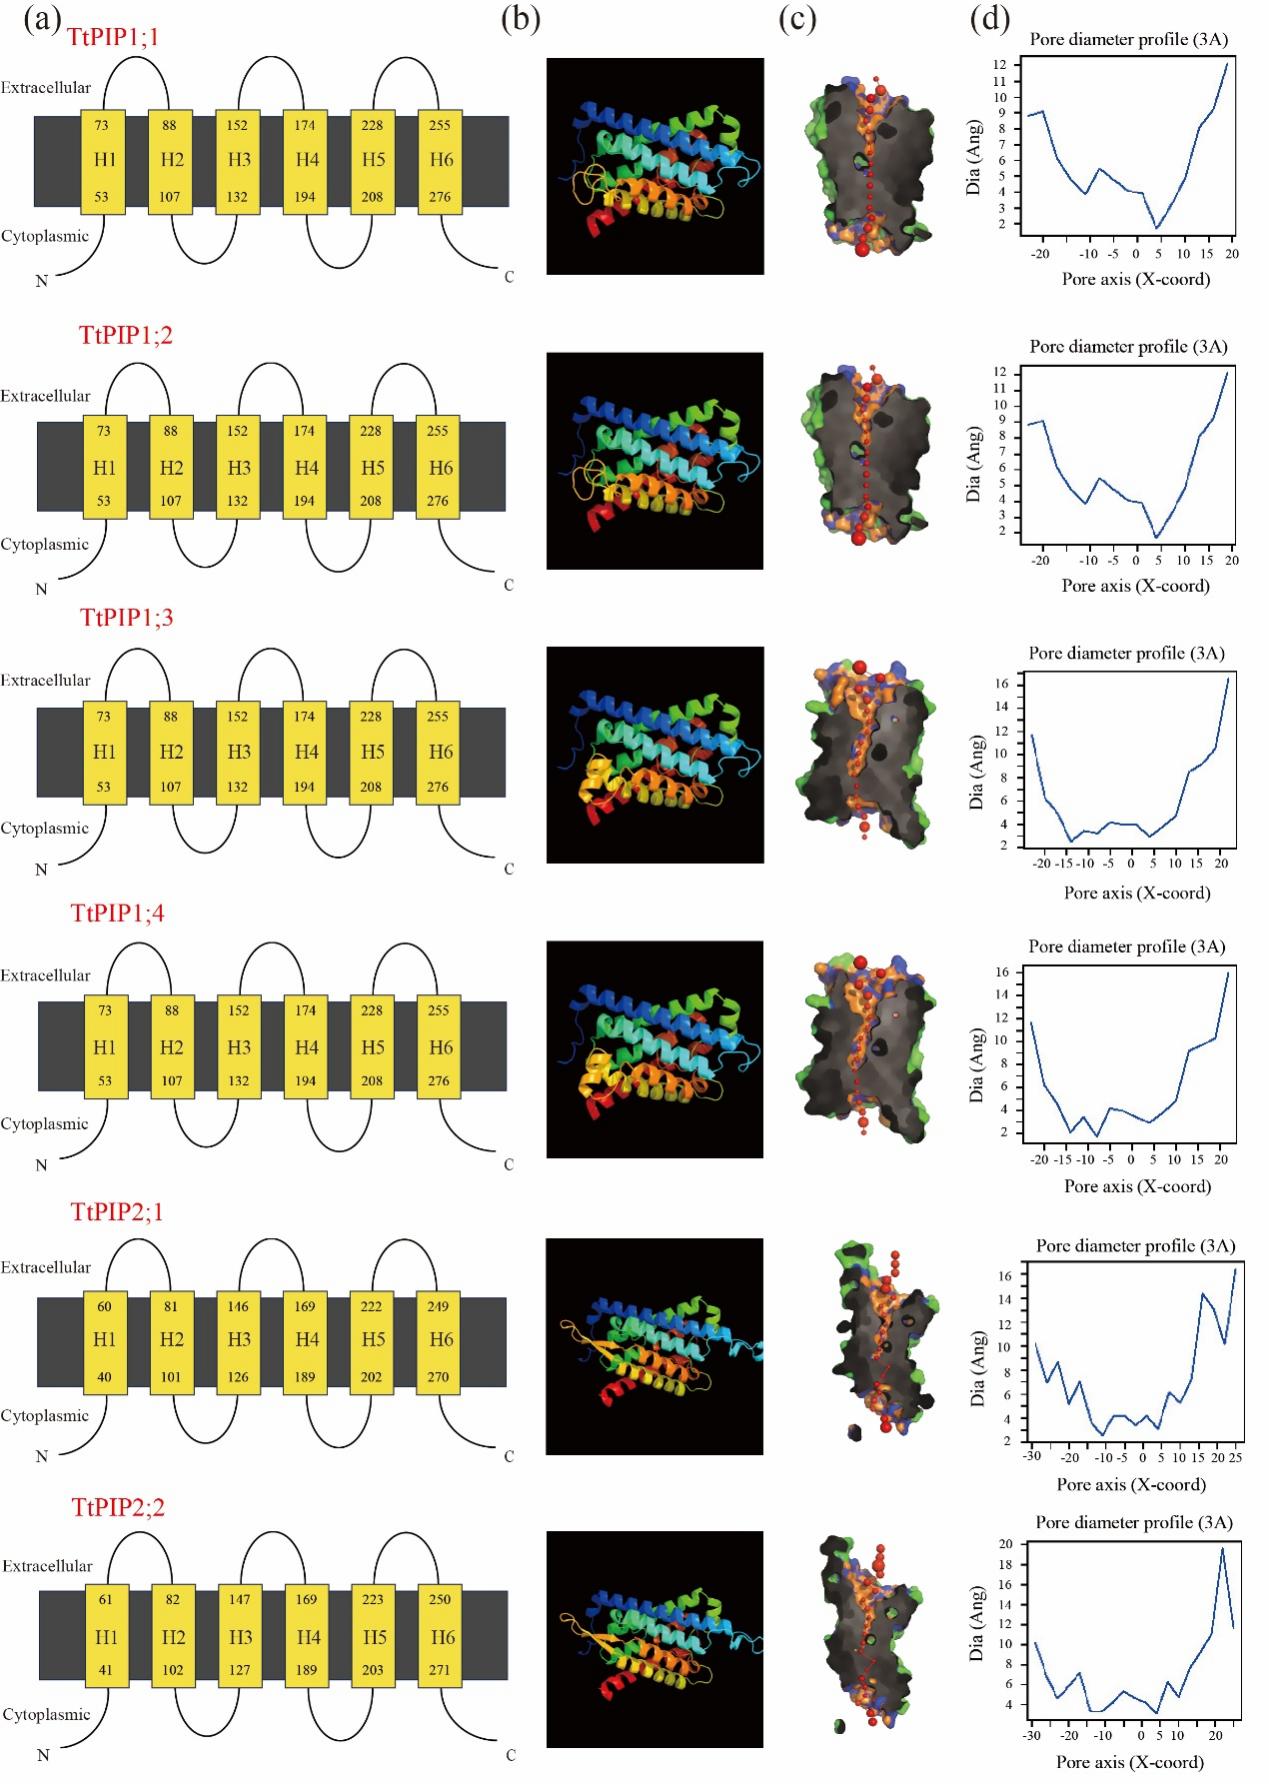

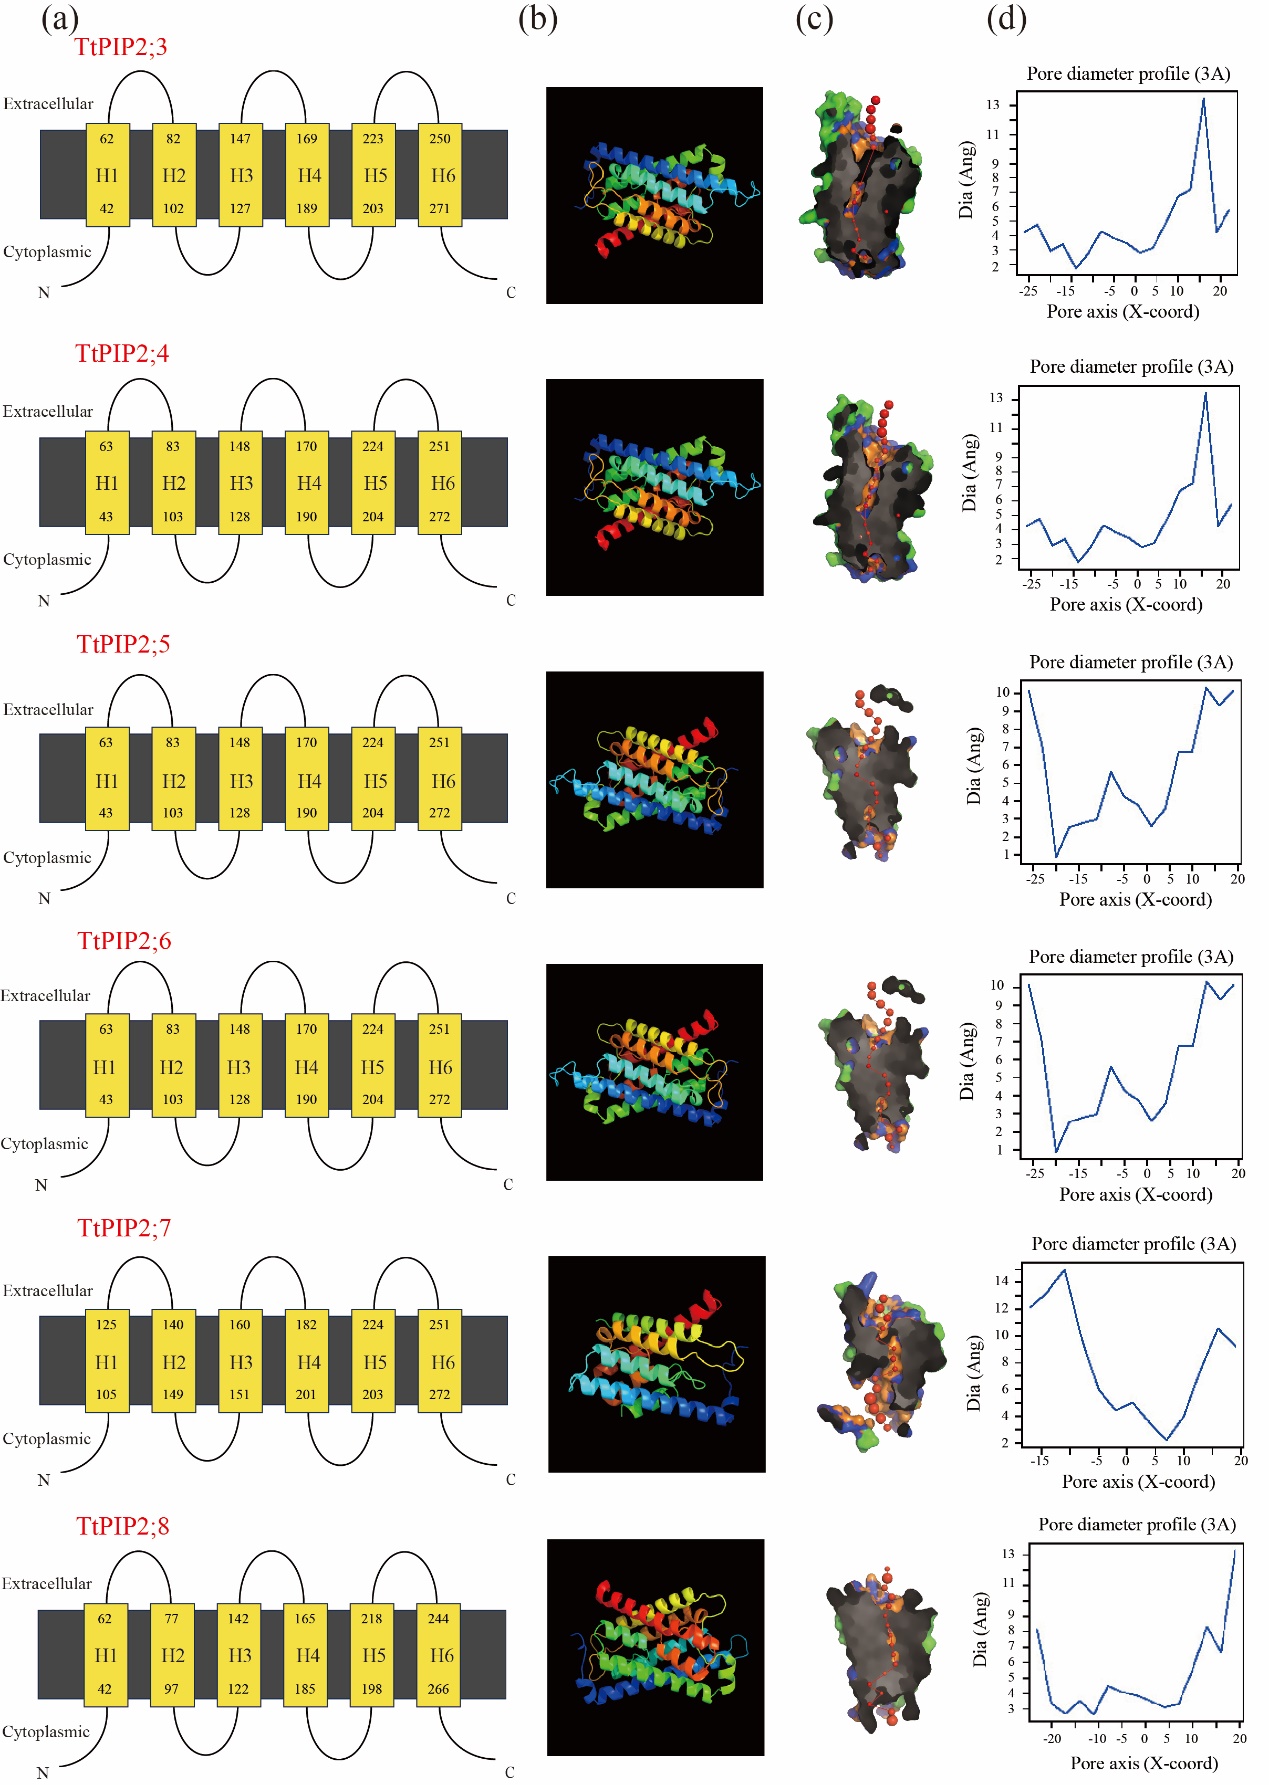

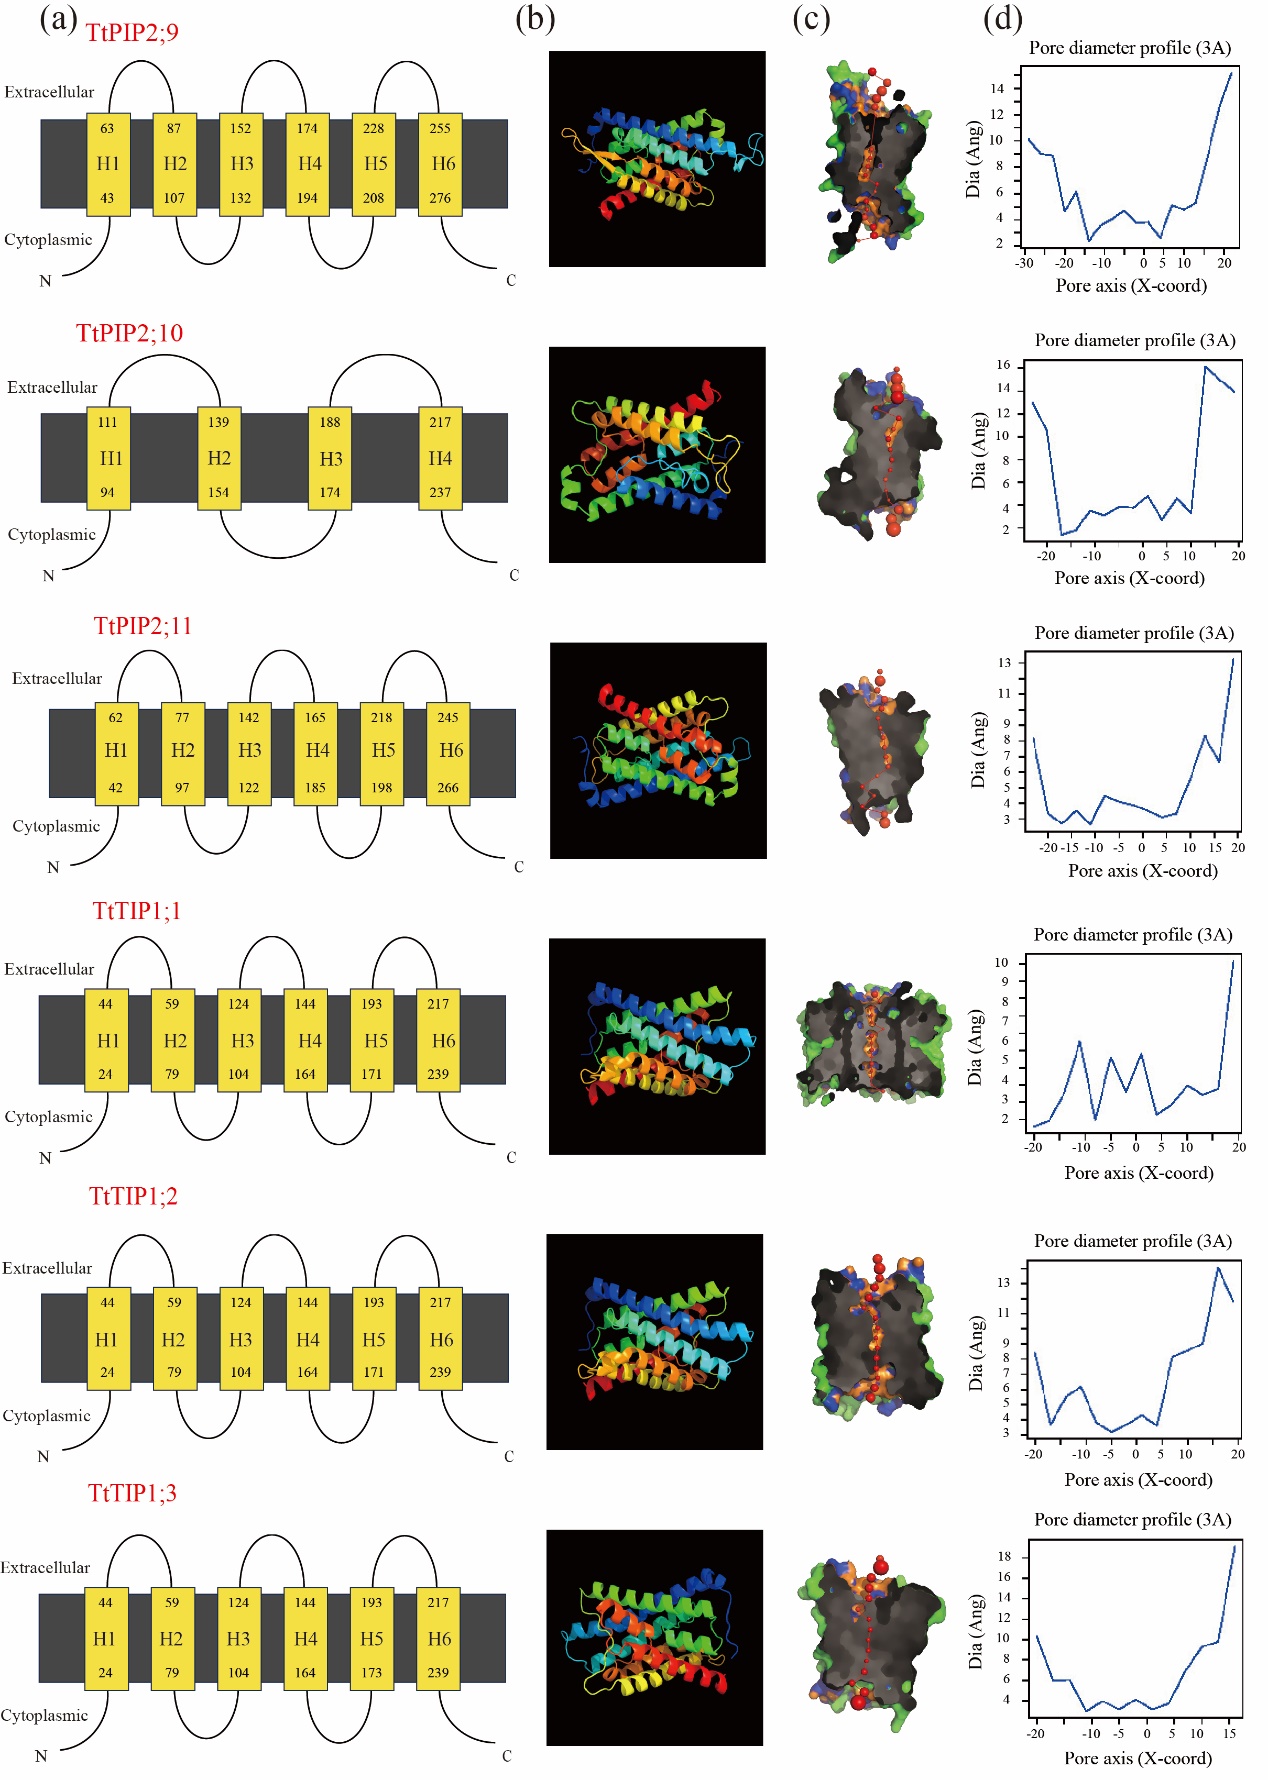

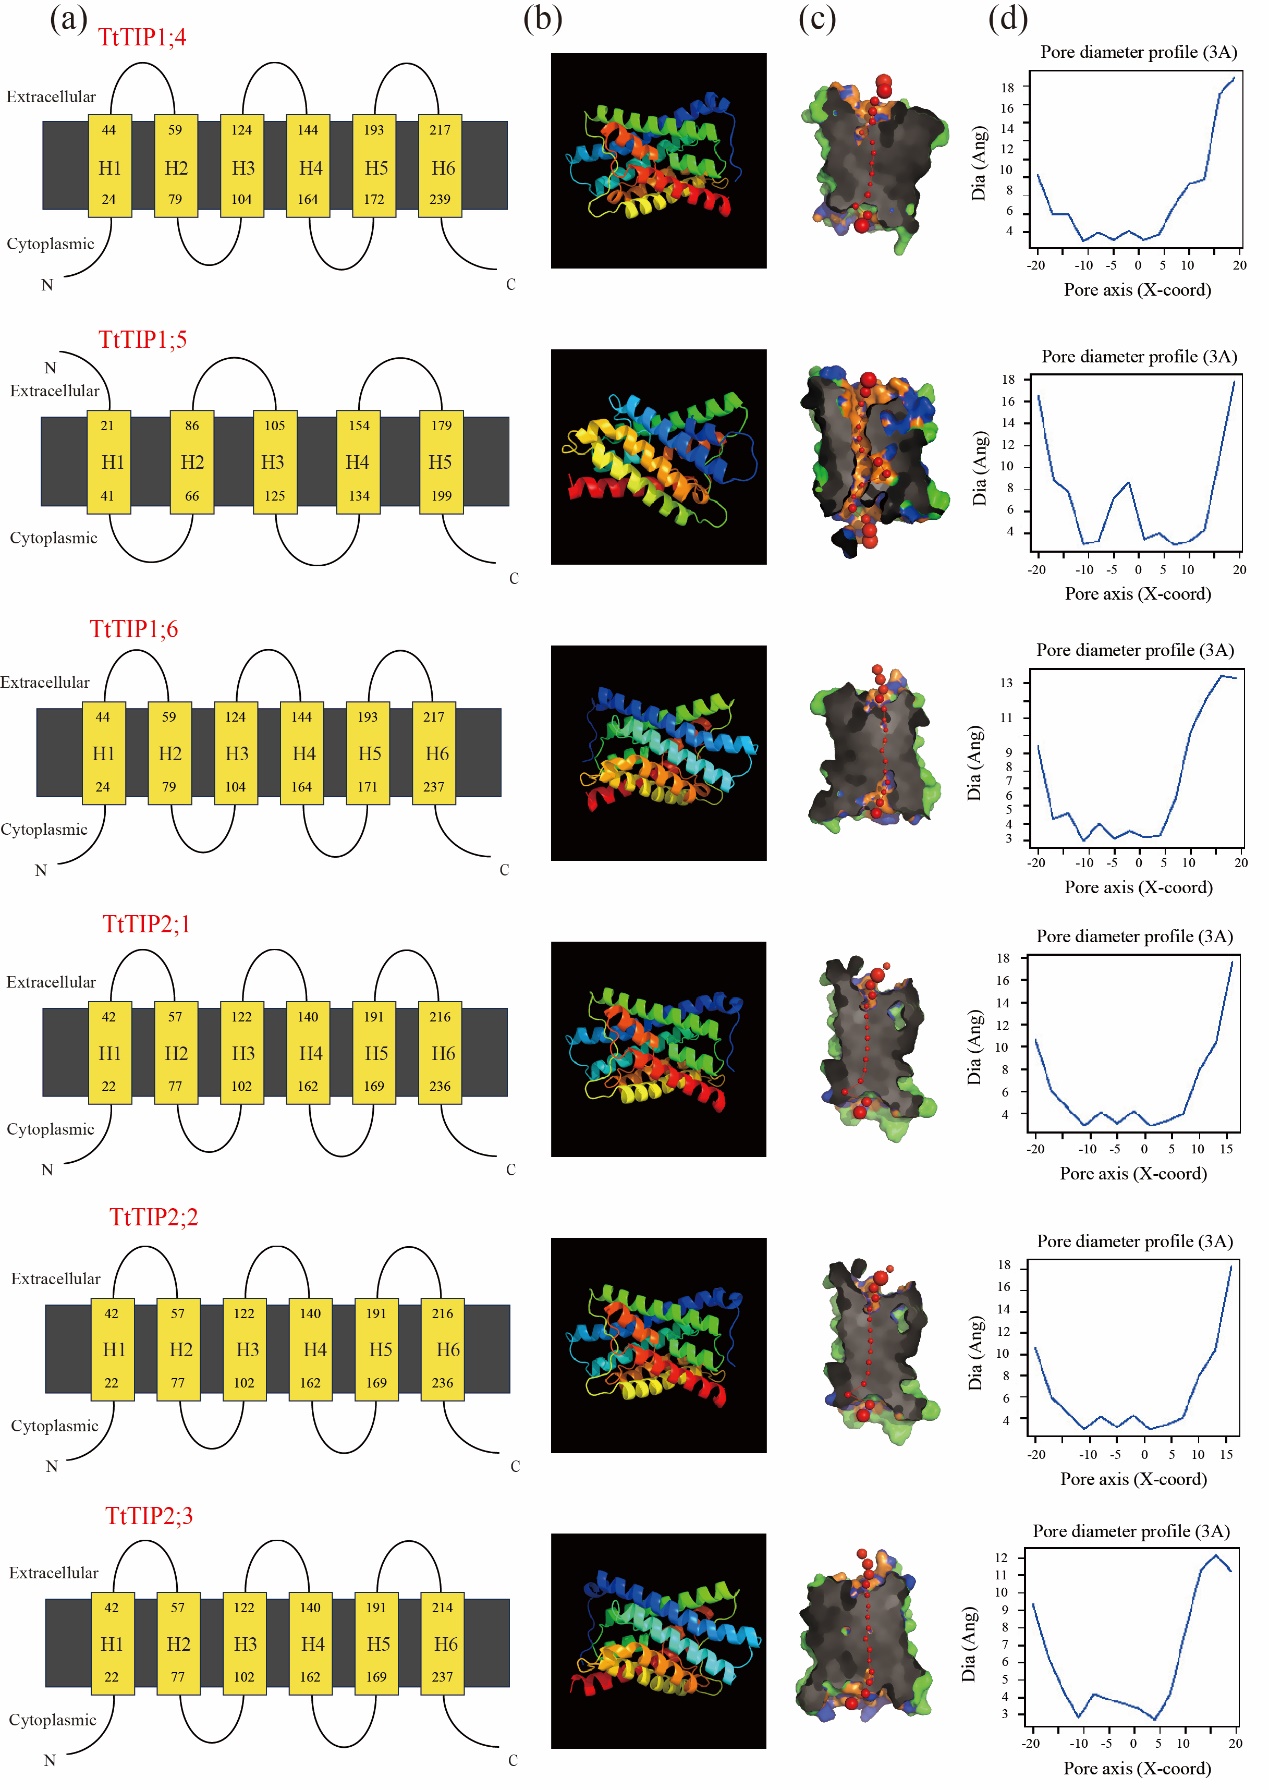

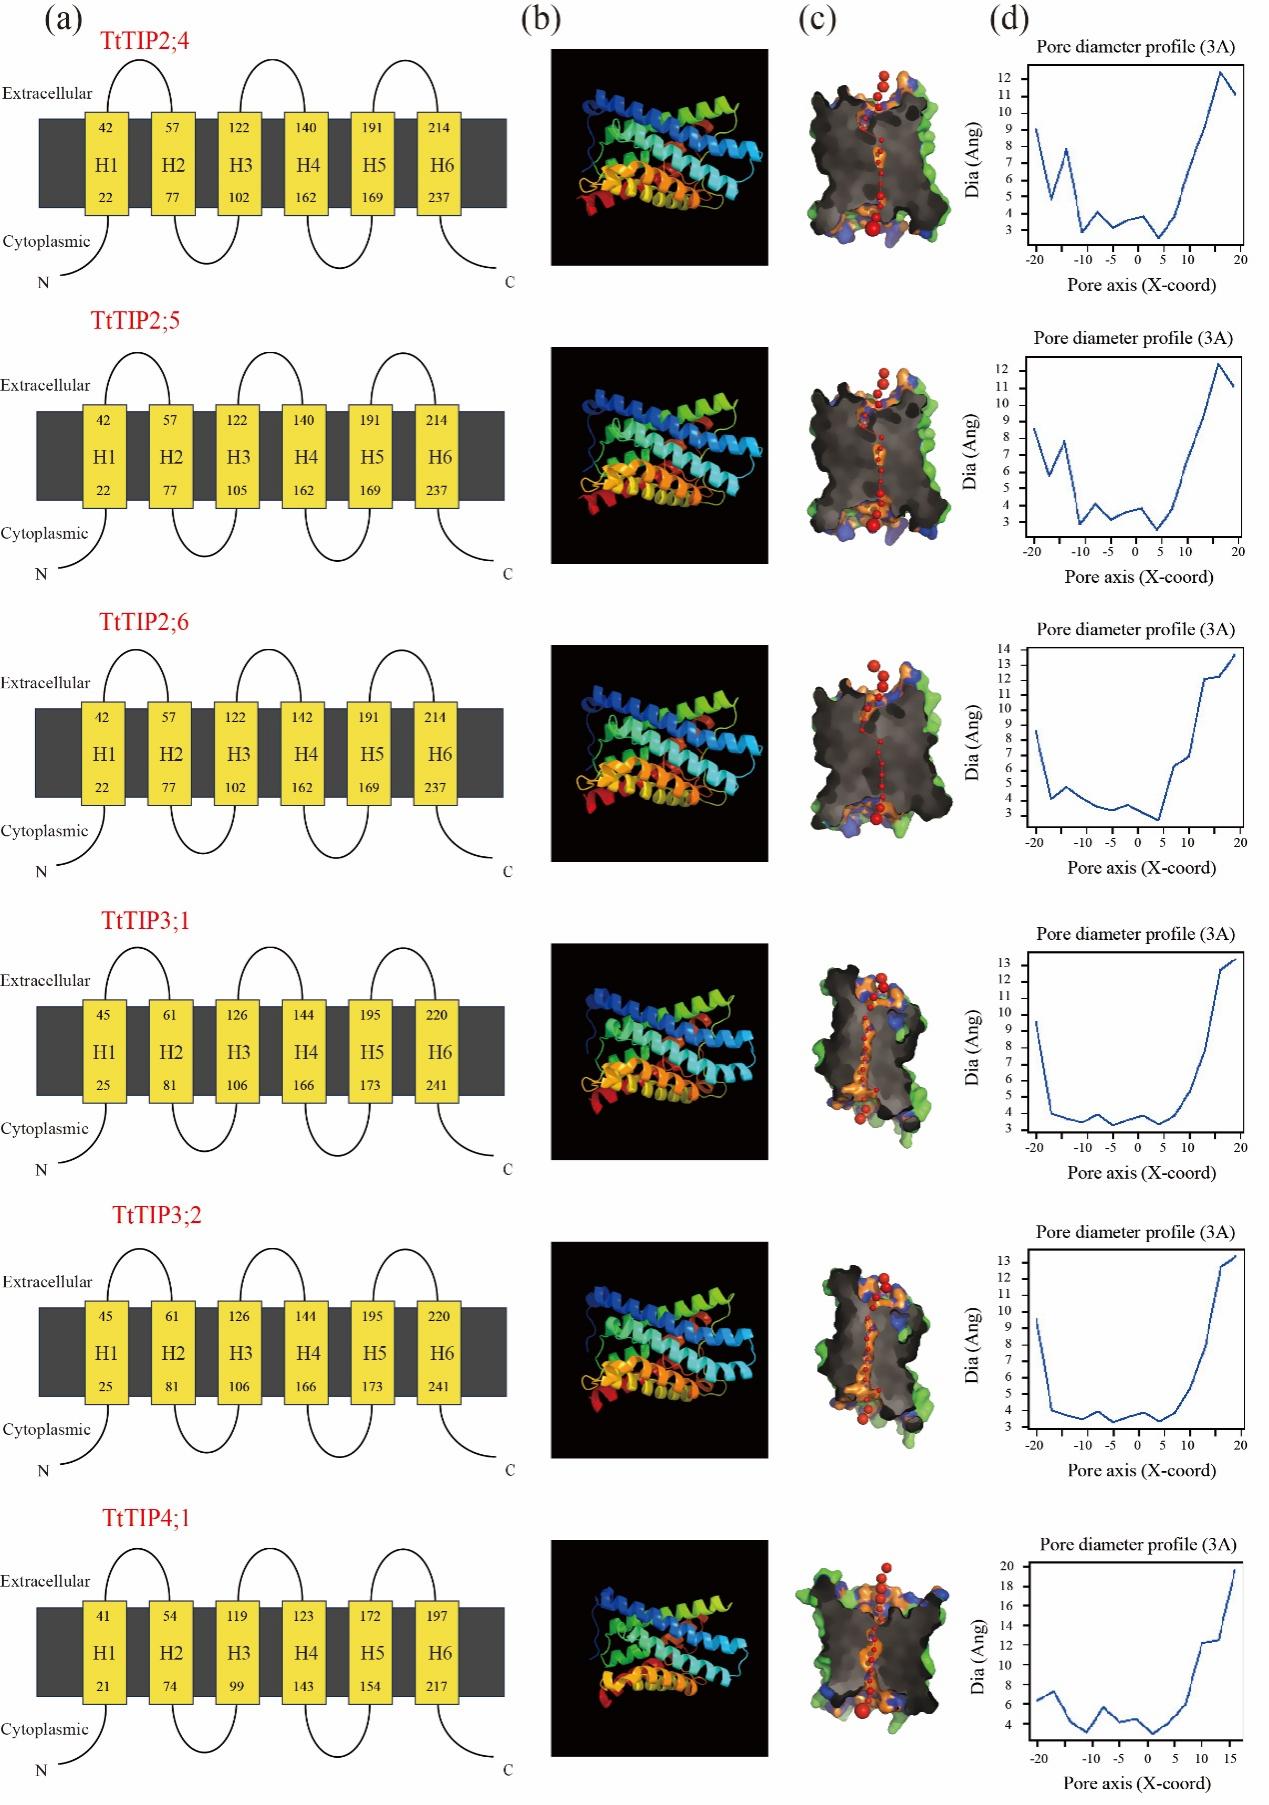

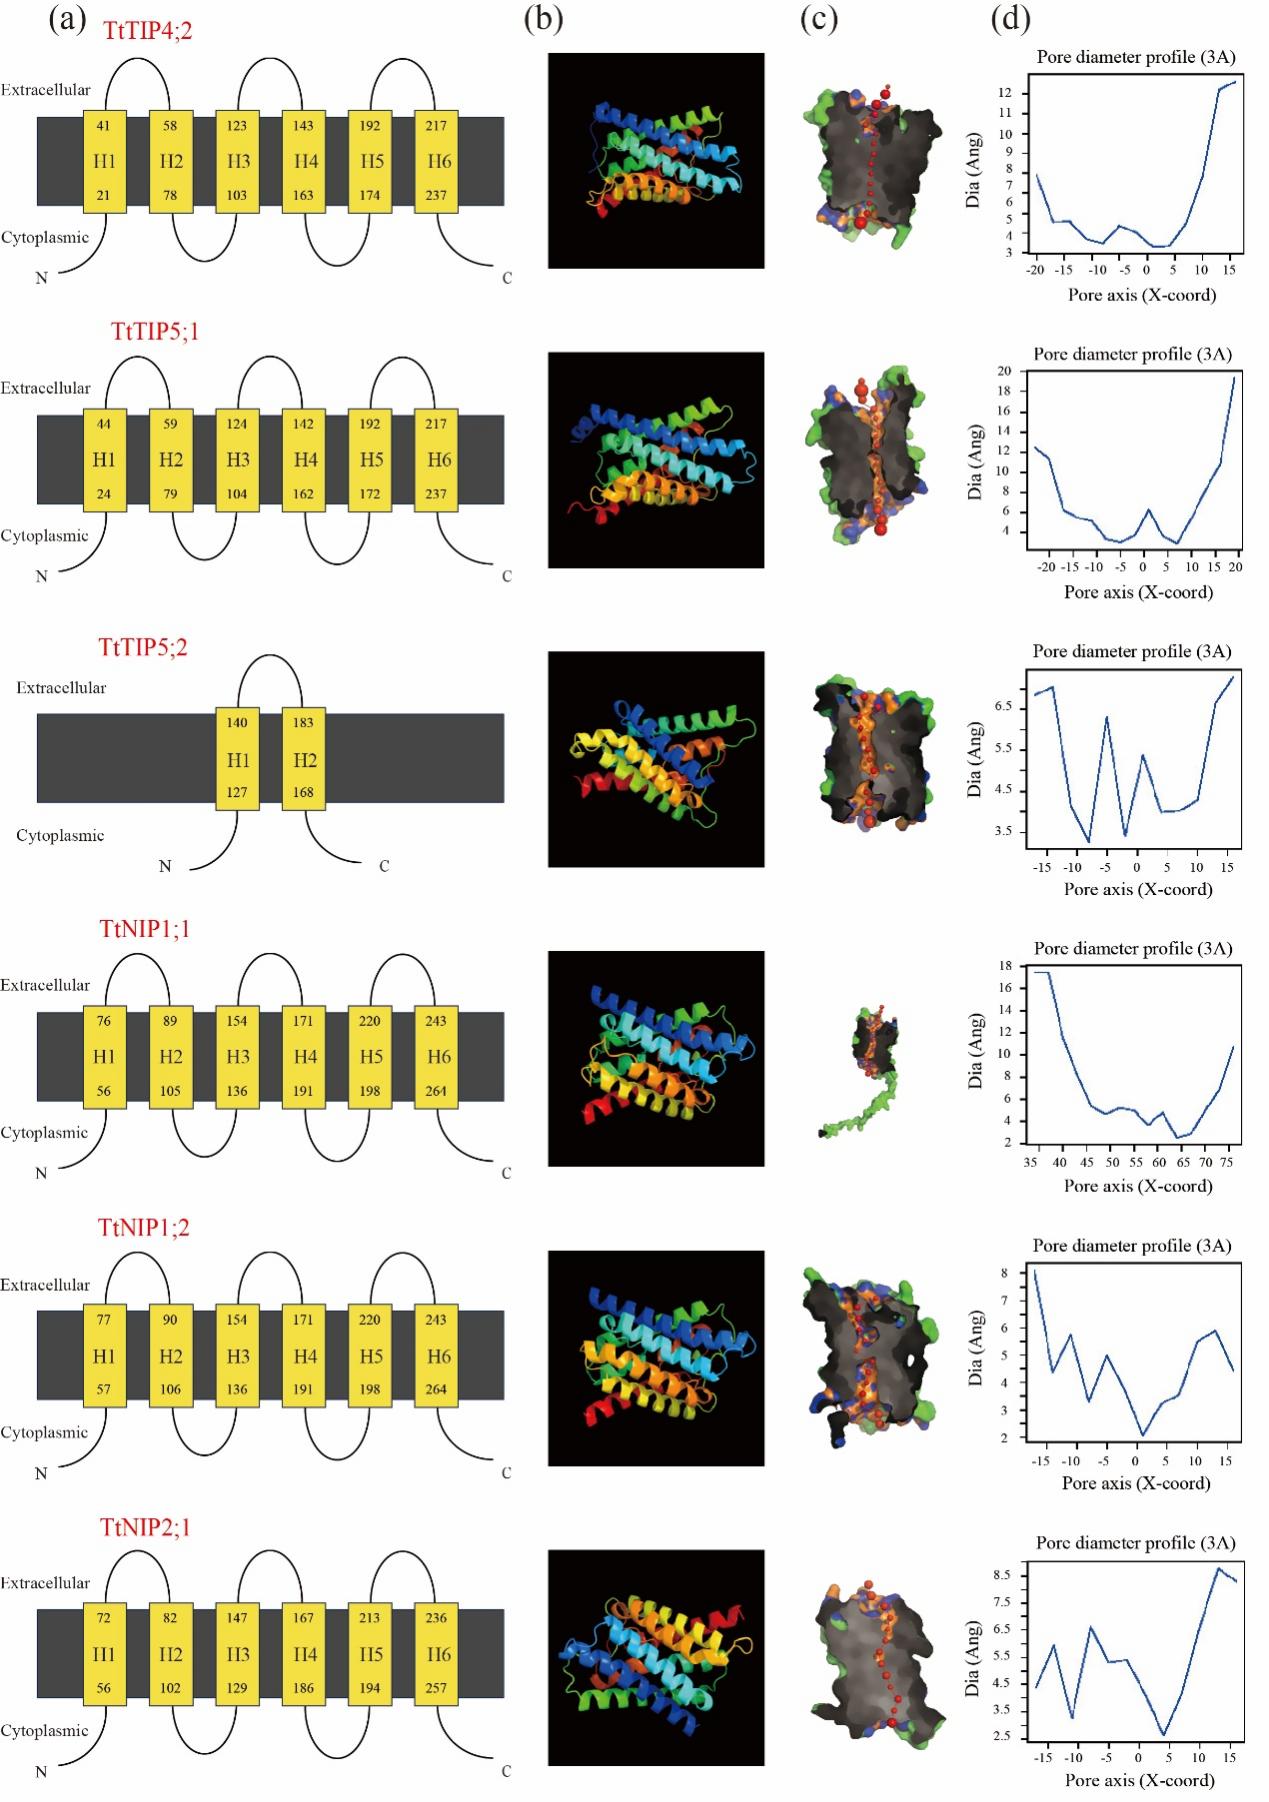

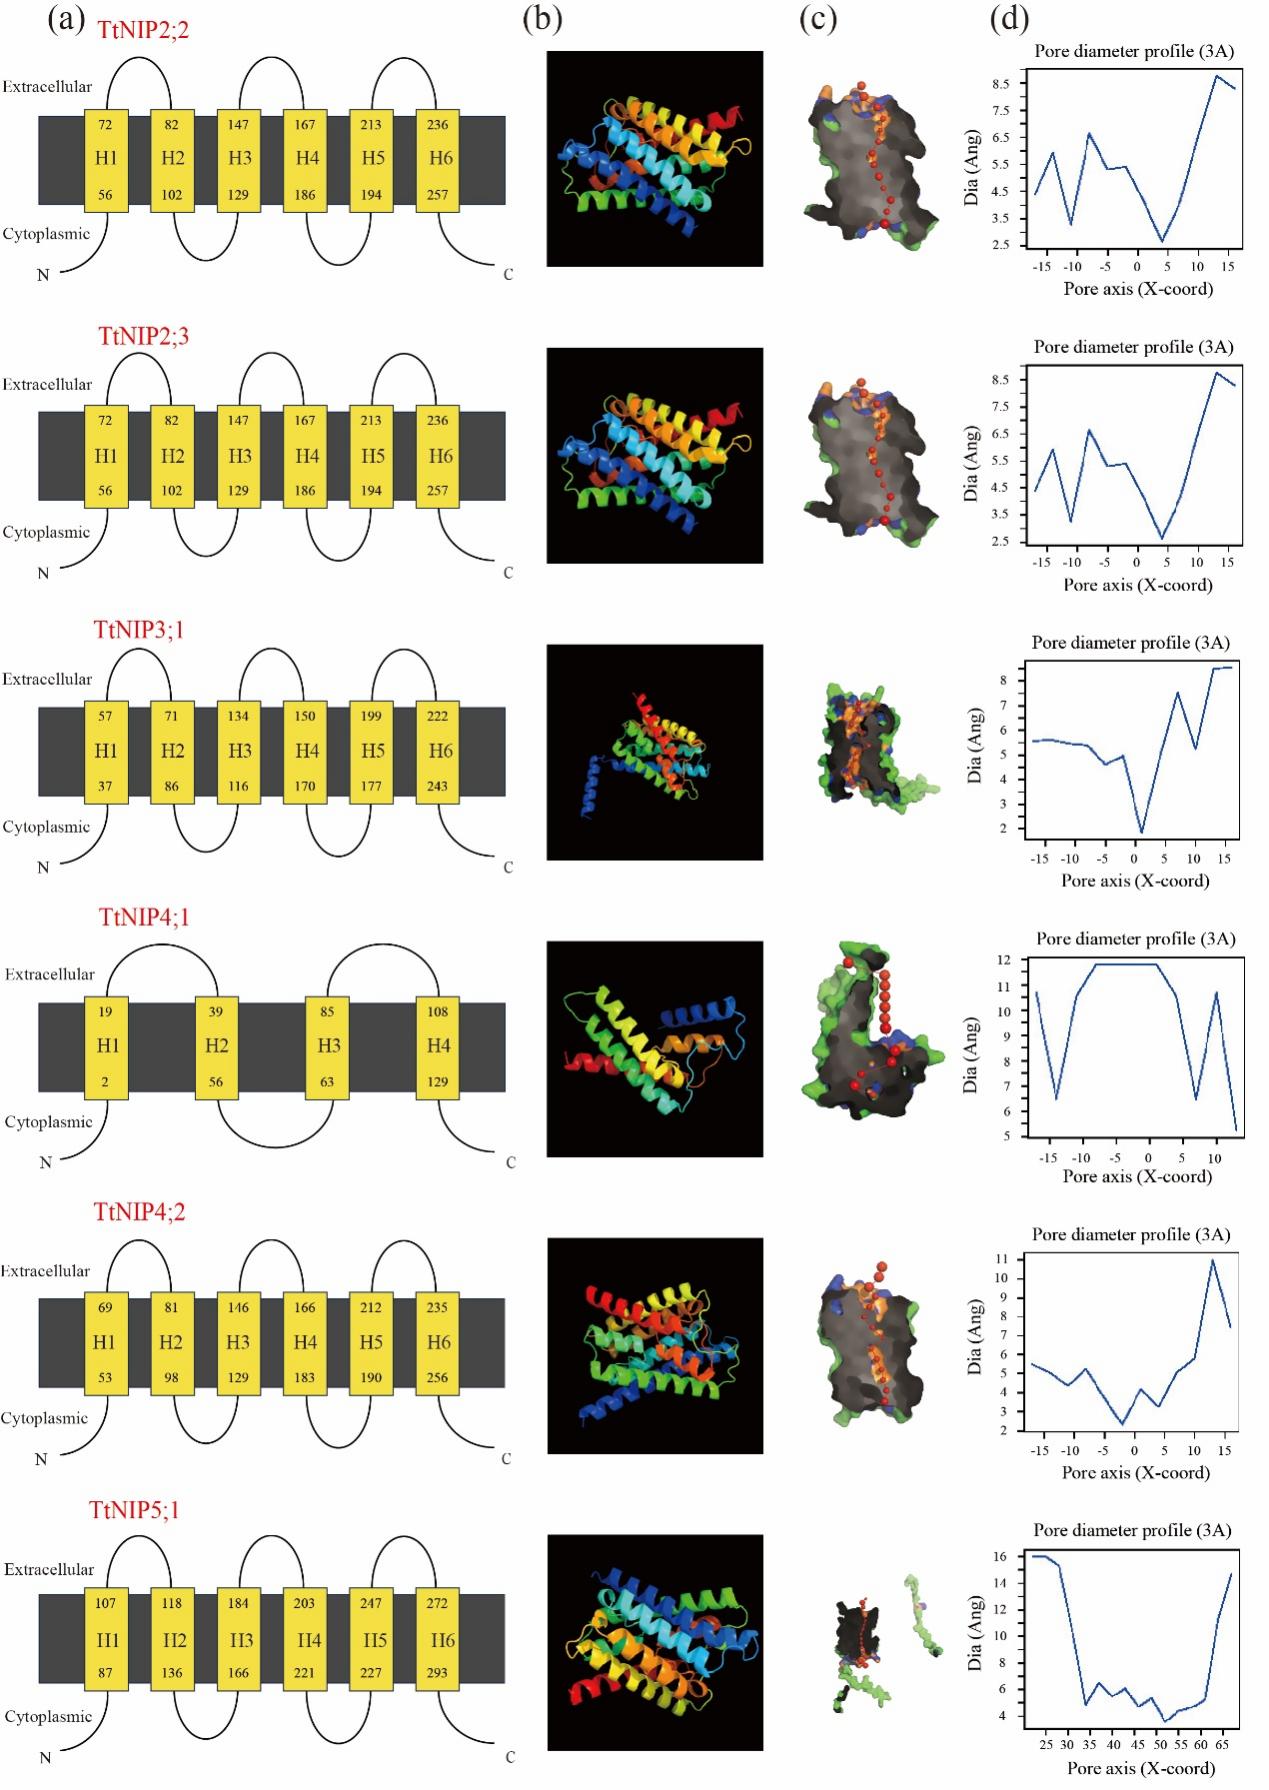

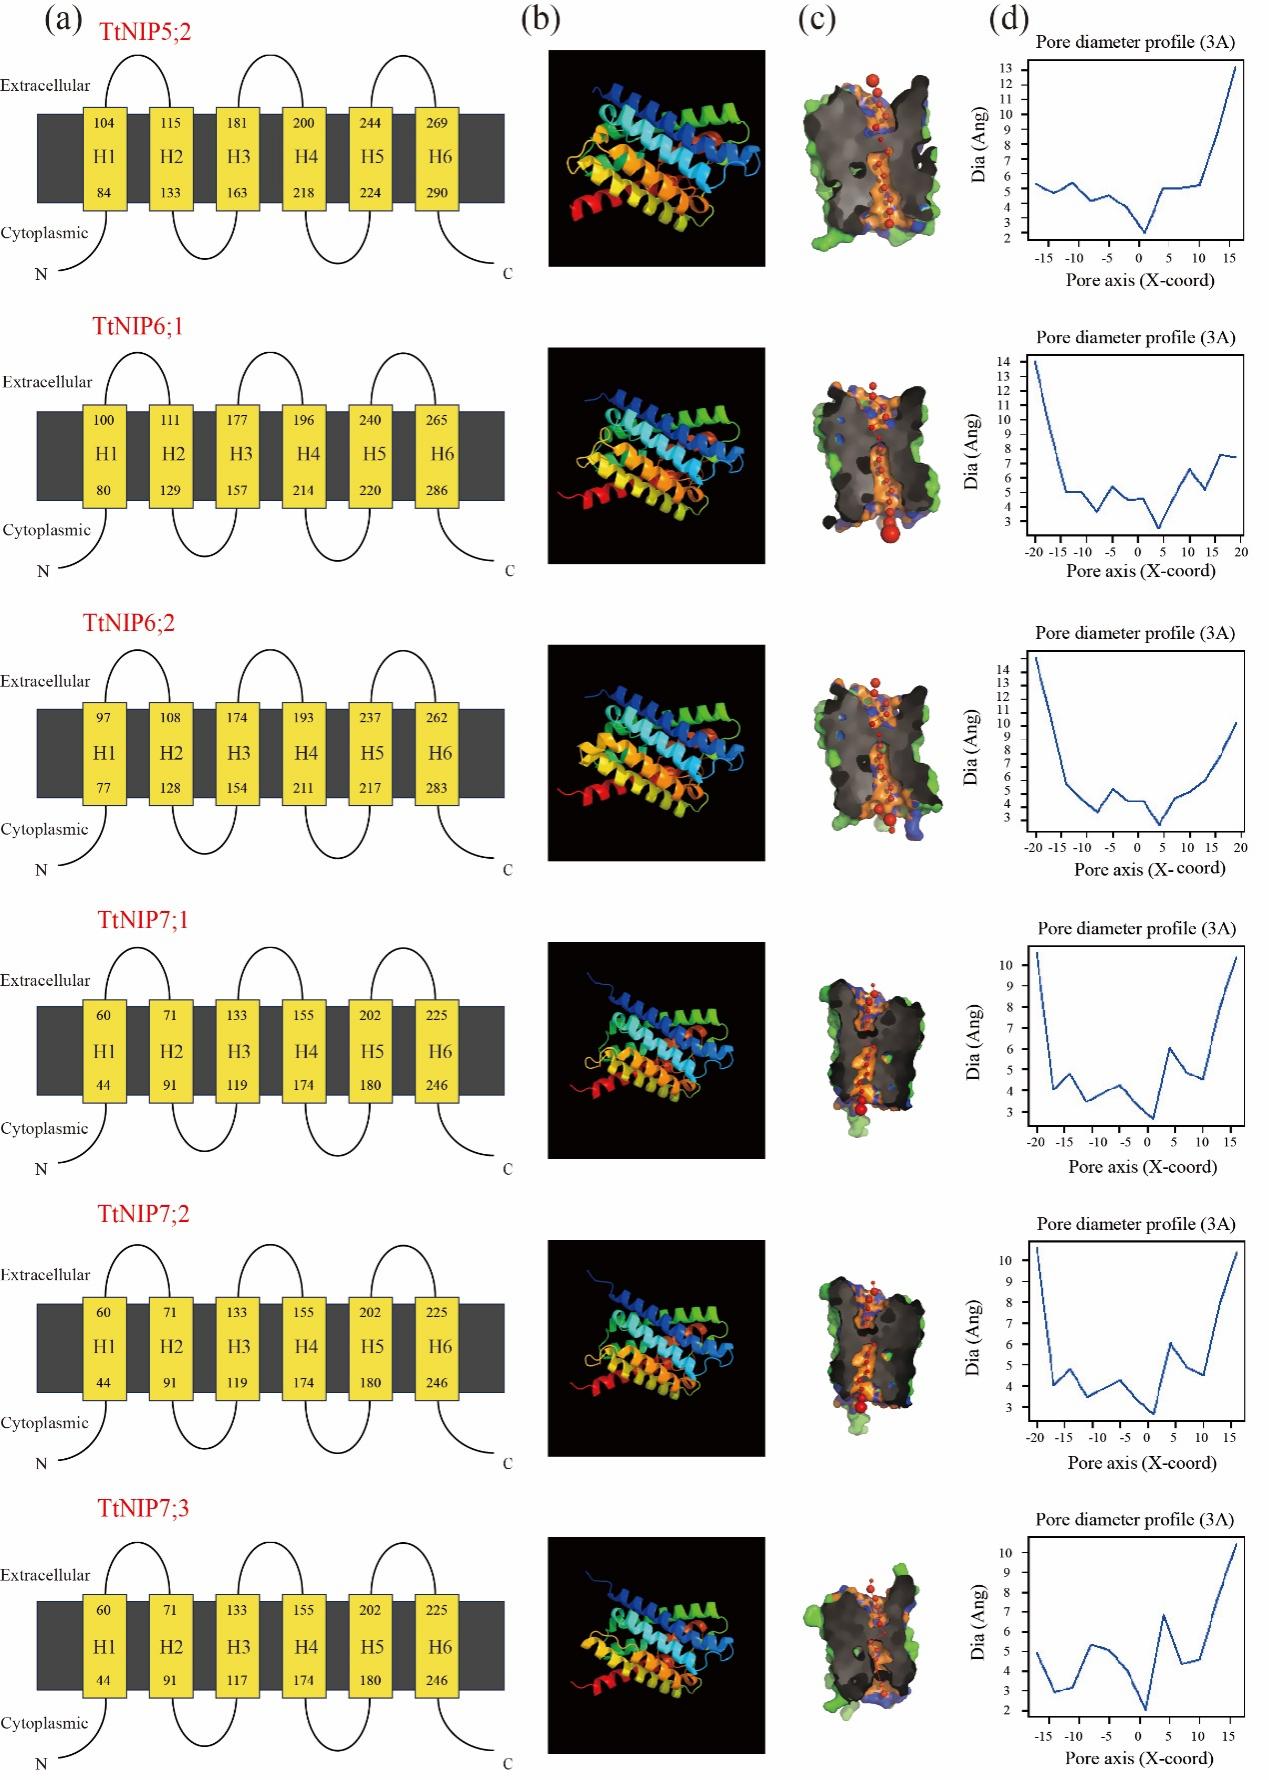

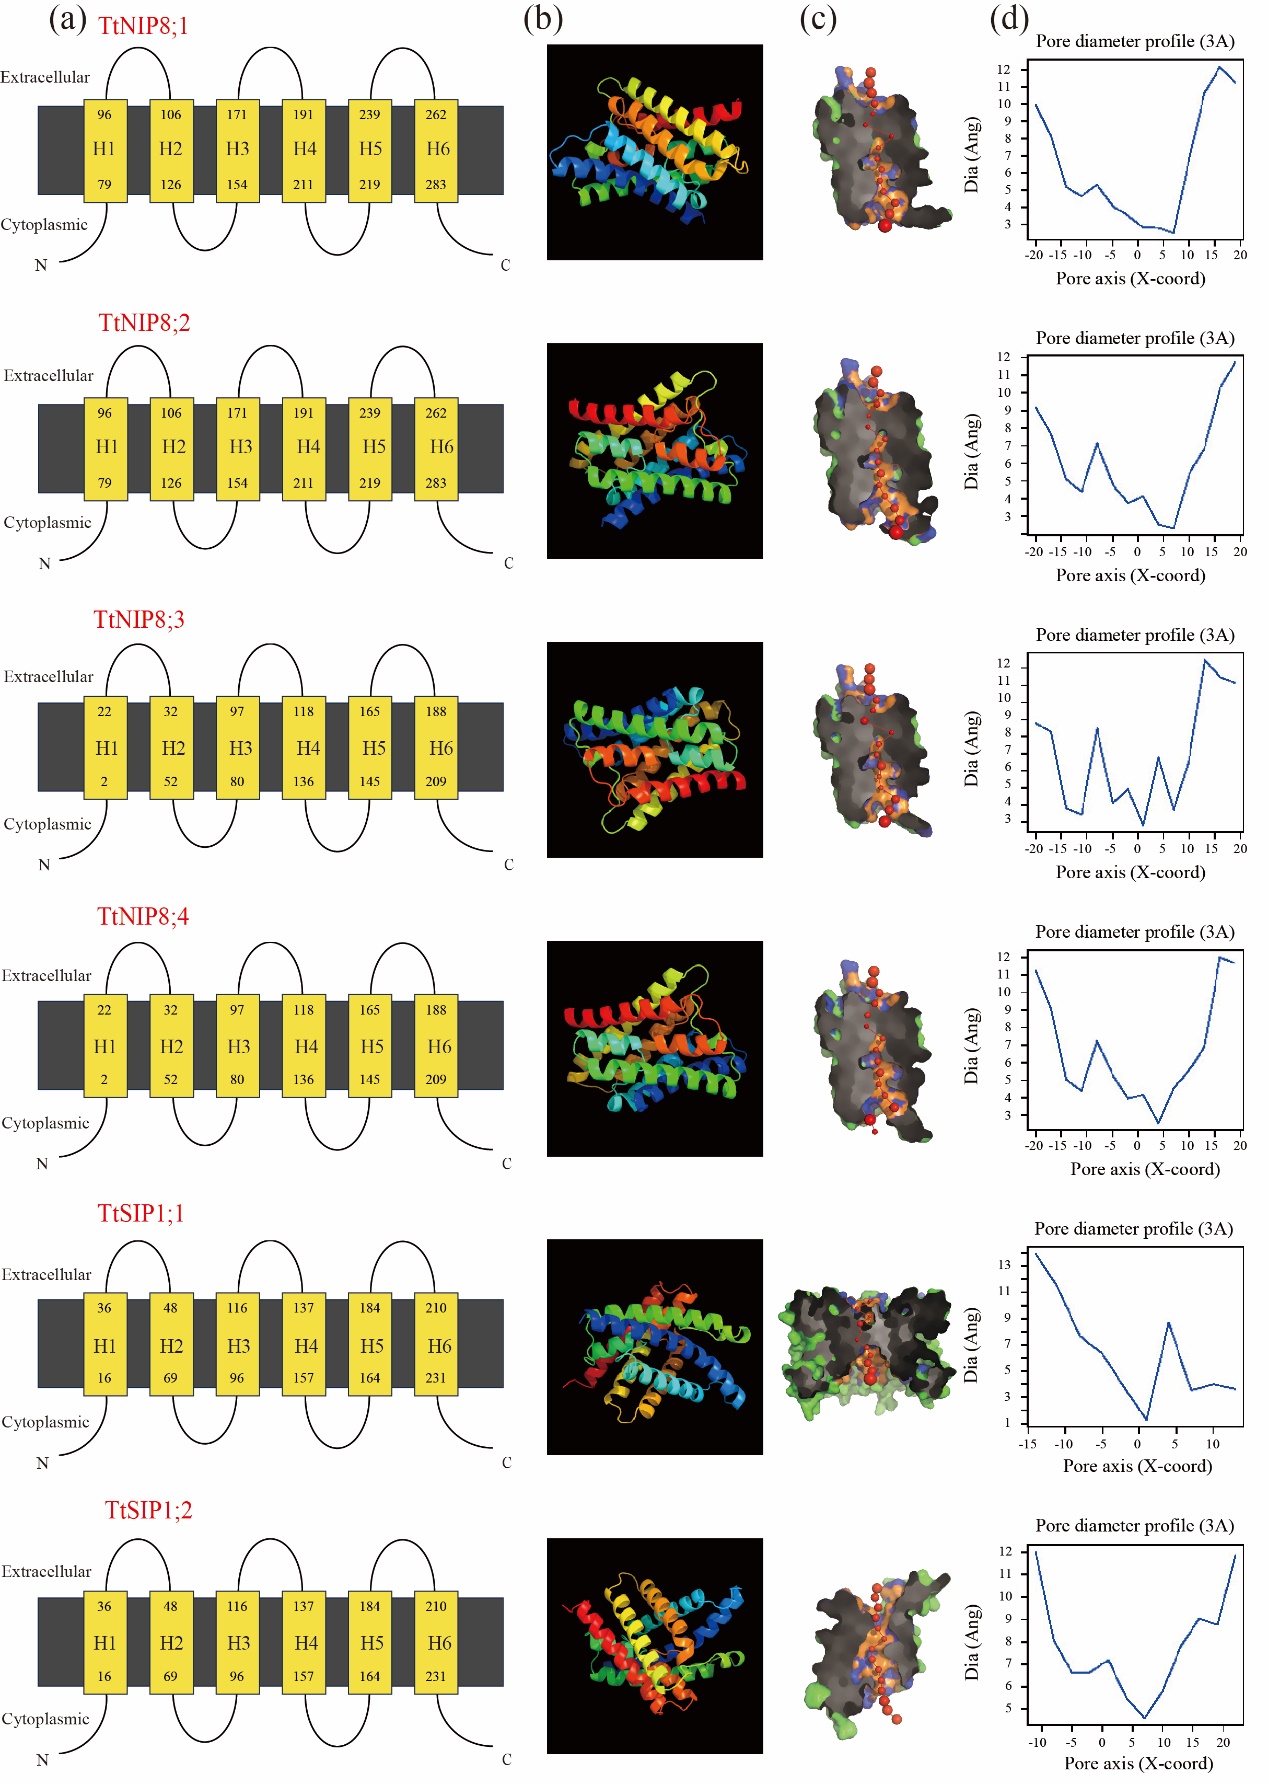

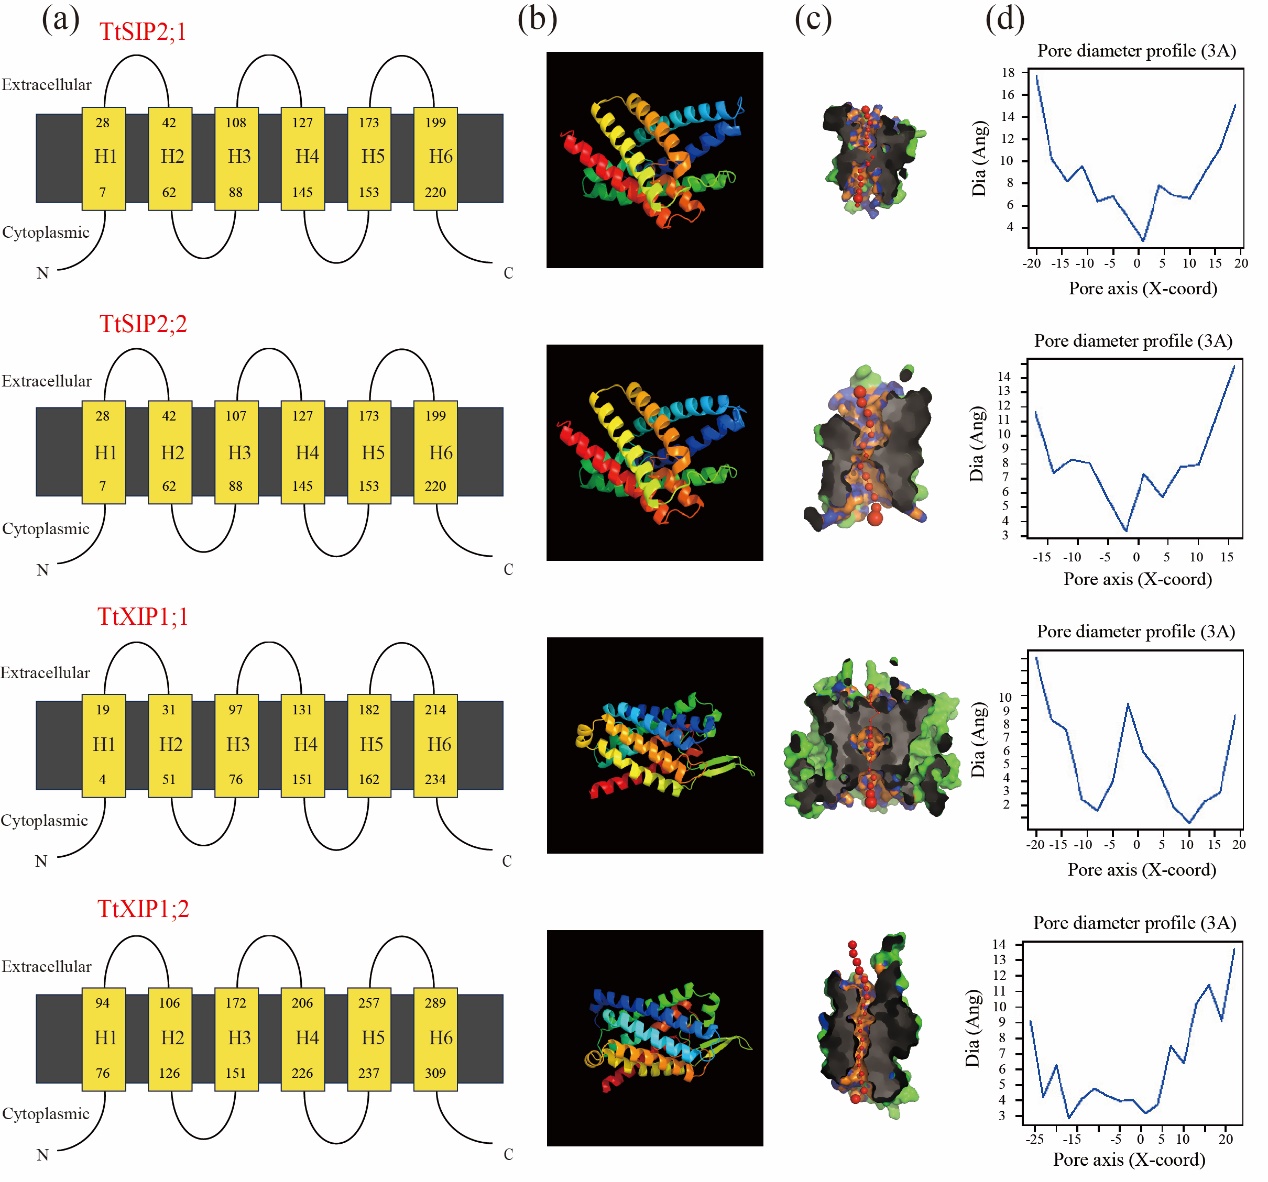


**Fig. S1.** The transmembrane region and 3D structure of TtAQPs predicted with Phyre2 server (https://www.sbg.bio.ic.ac.uk/phyre2/html/page.cgi?id=contact). Transmembrane topology (a) and 3D structure (b) of 58 TtAQPs were constructed using the Phyre2 and color-coded with a rainbow scheme (N- to C-terminus). Pore morphology (c) and dimensions (d) were analyzed using PoreWalker software, providing cross-sectional views and pore size measurements.


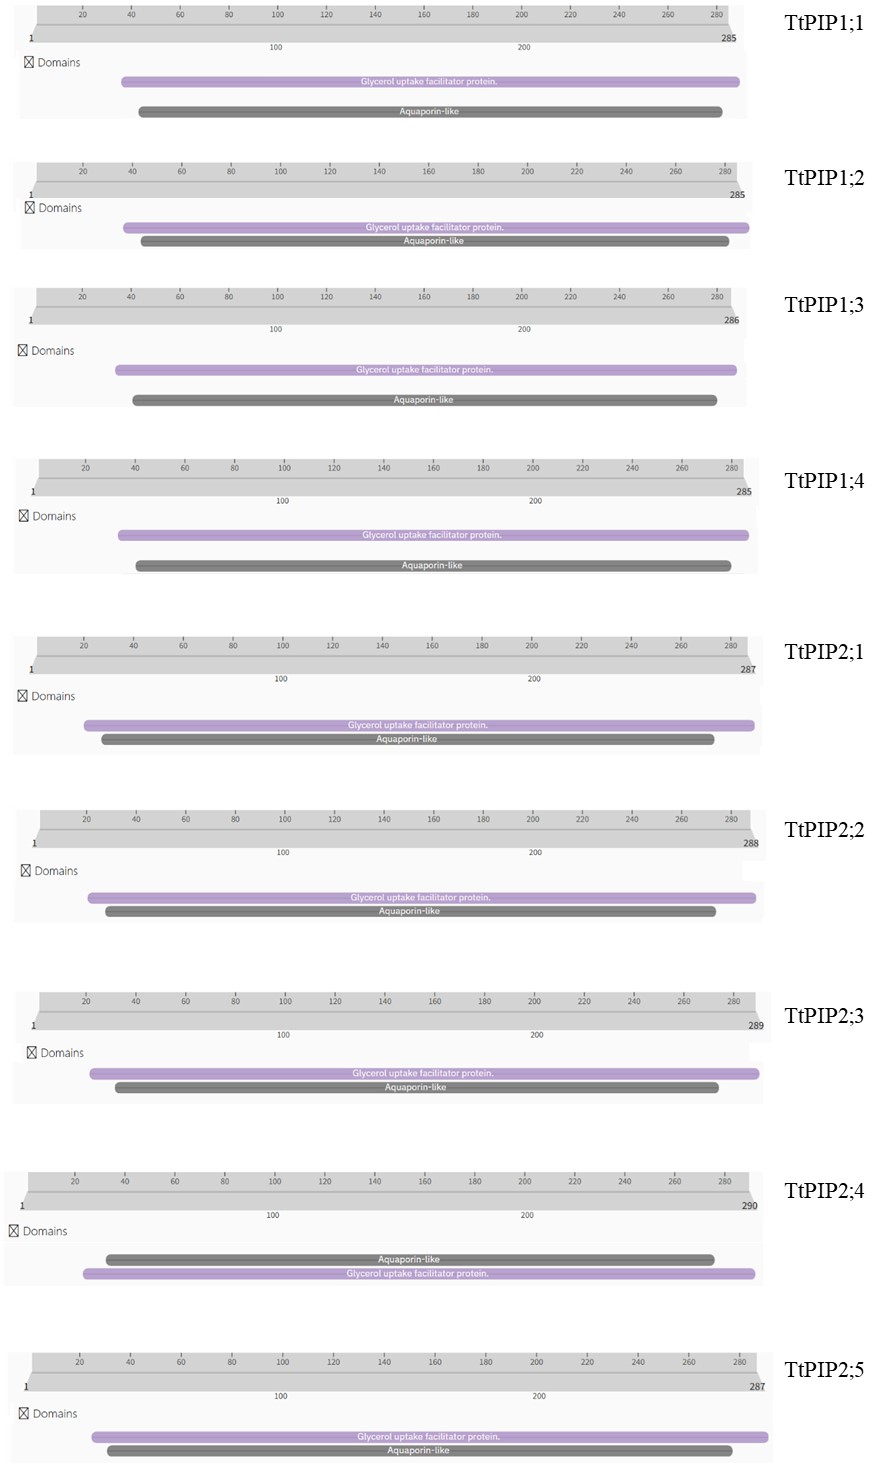

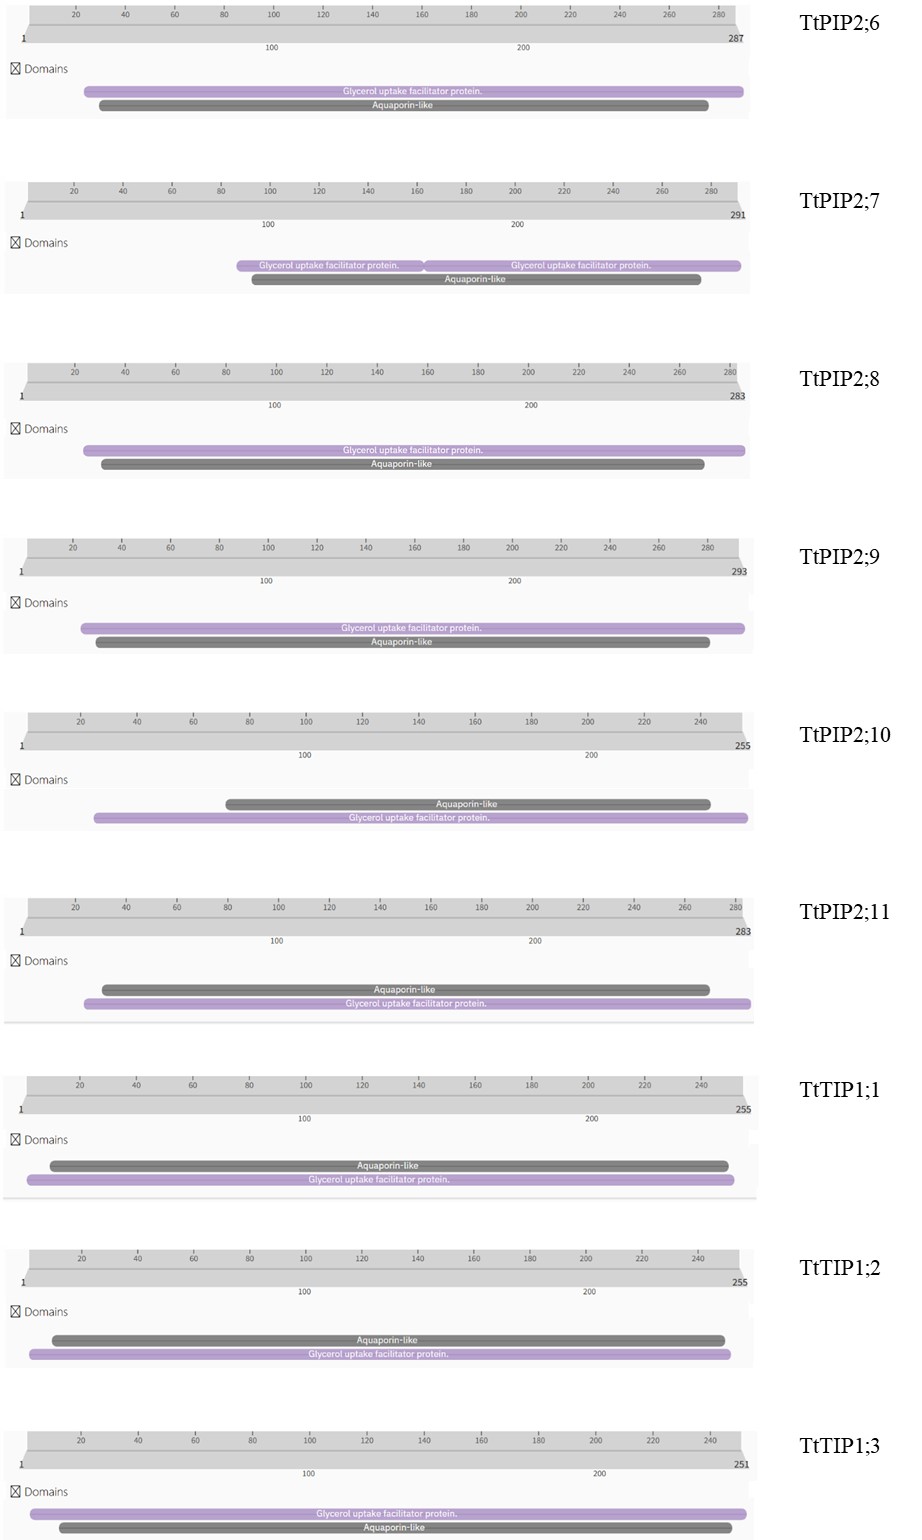

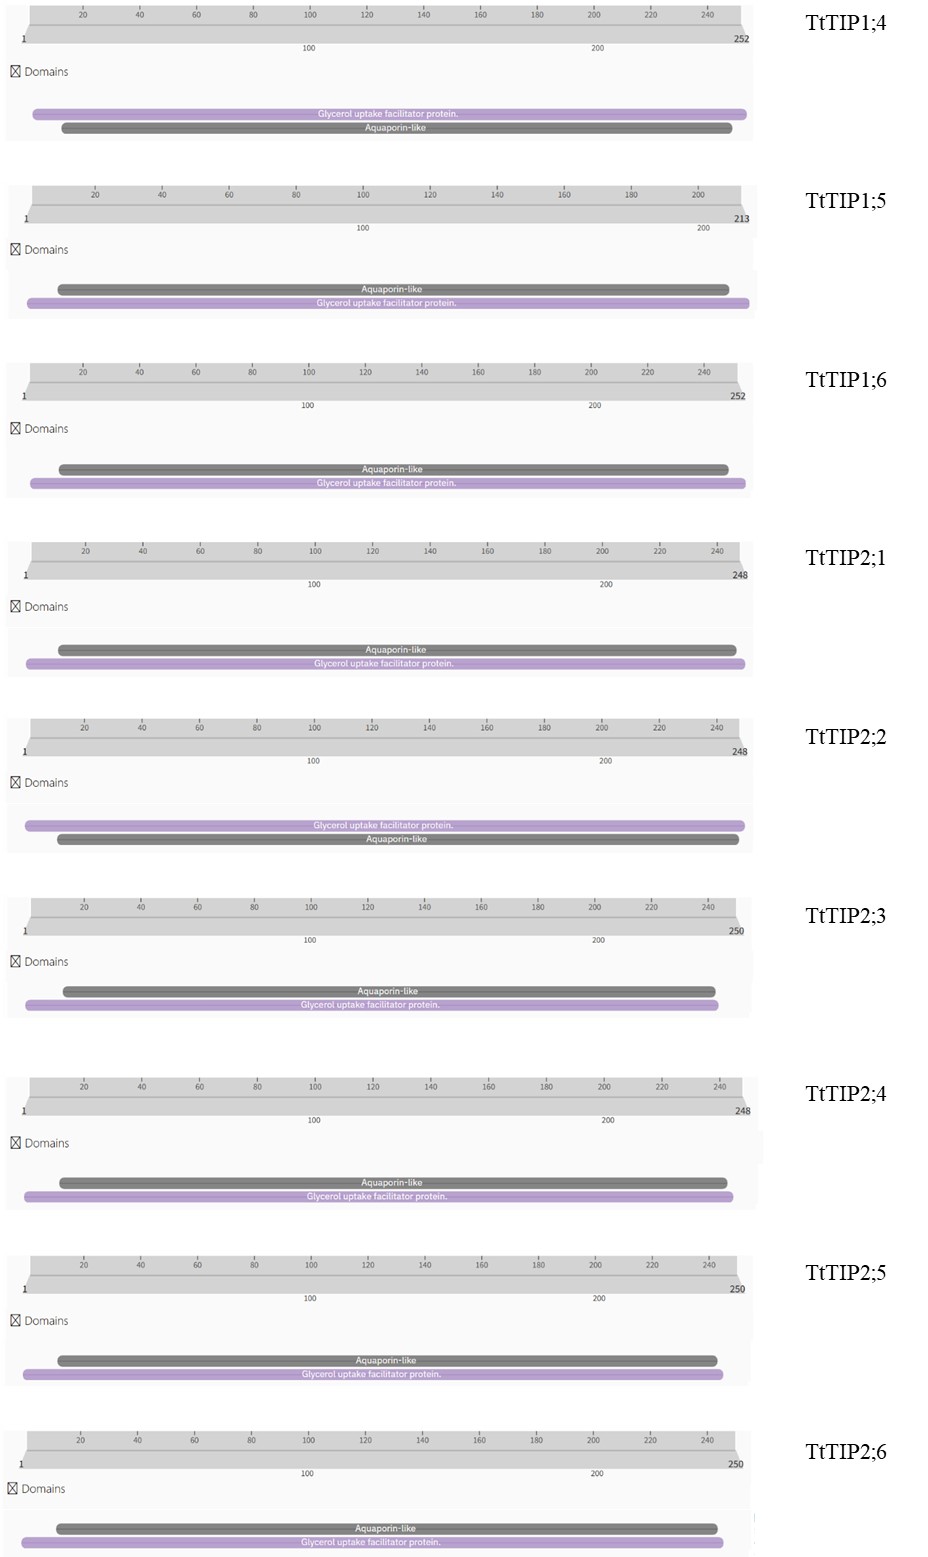

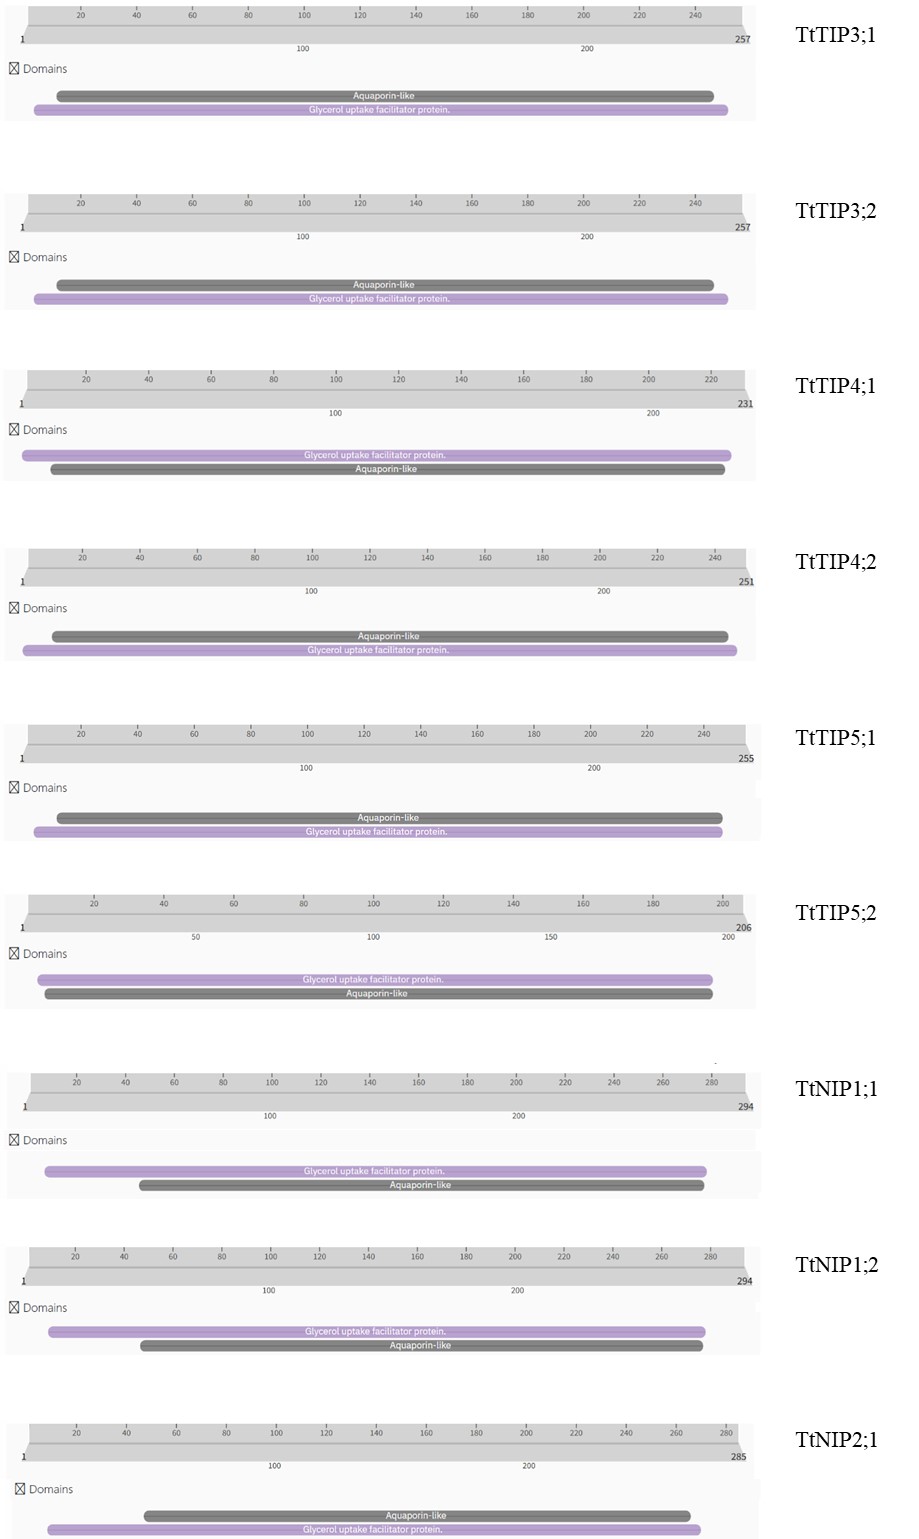

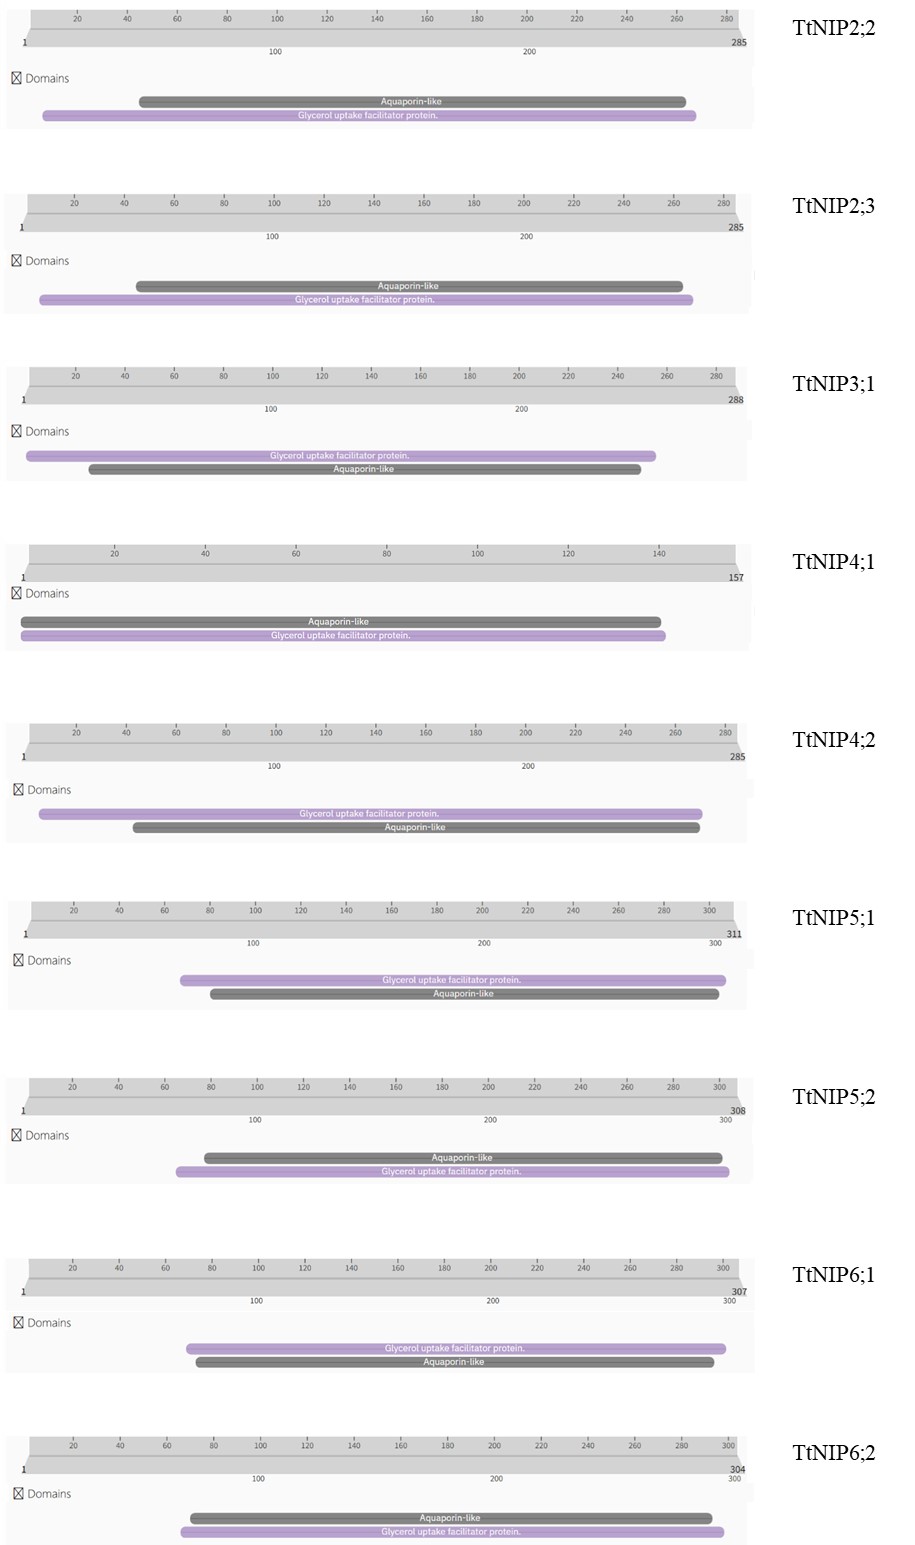

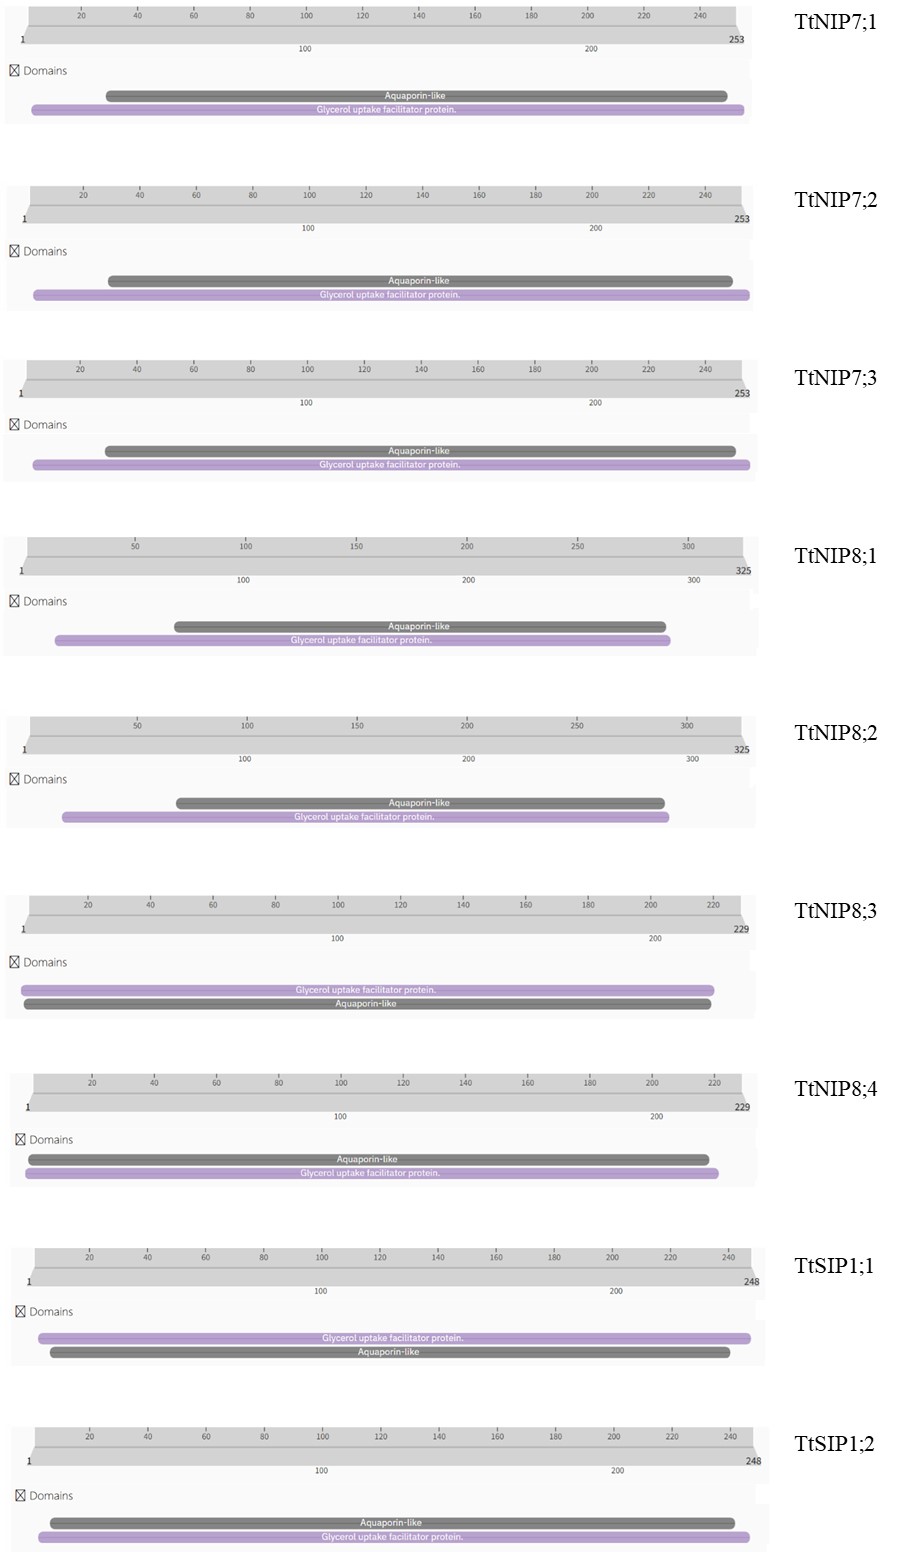

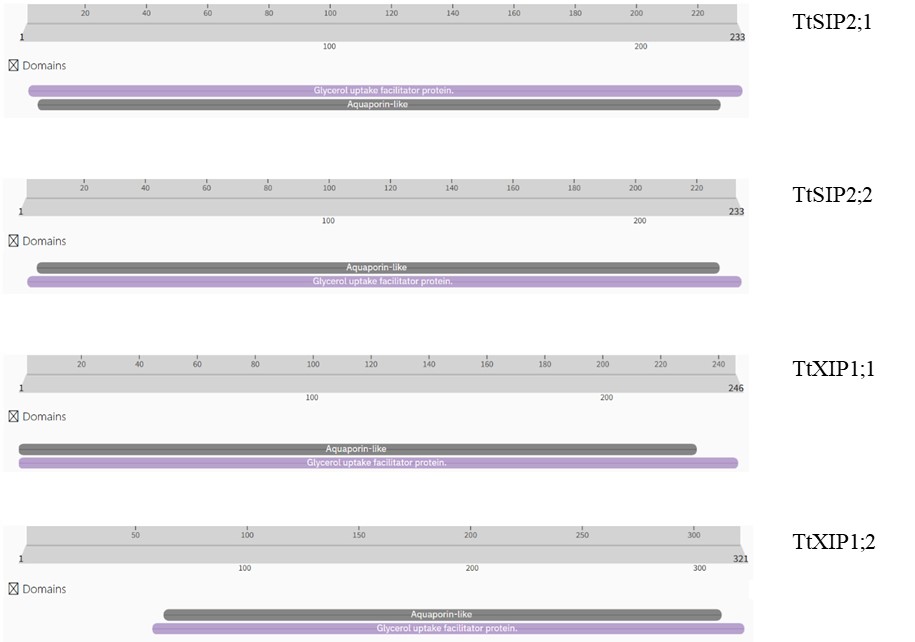


**Fig. S2.** The TtAQPs conserved domains predicted with InterProscan (https://www.ebi.ac.uk/interpro/search/sequence/). The predicted conserved domains of TtAQP family are presented here. All members have predicted domains including Aquaporin-like (grey) and Glycerol uptake facilitator protein (purple) within their amino acid sequences.


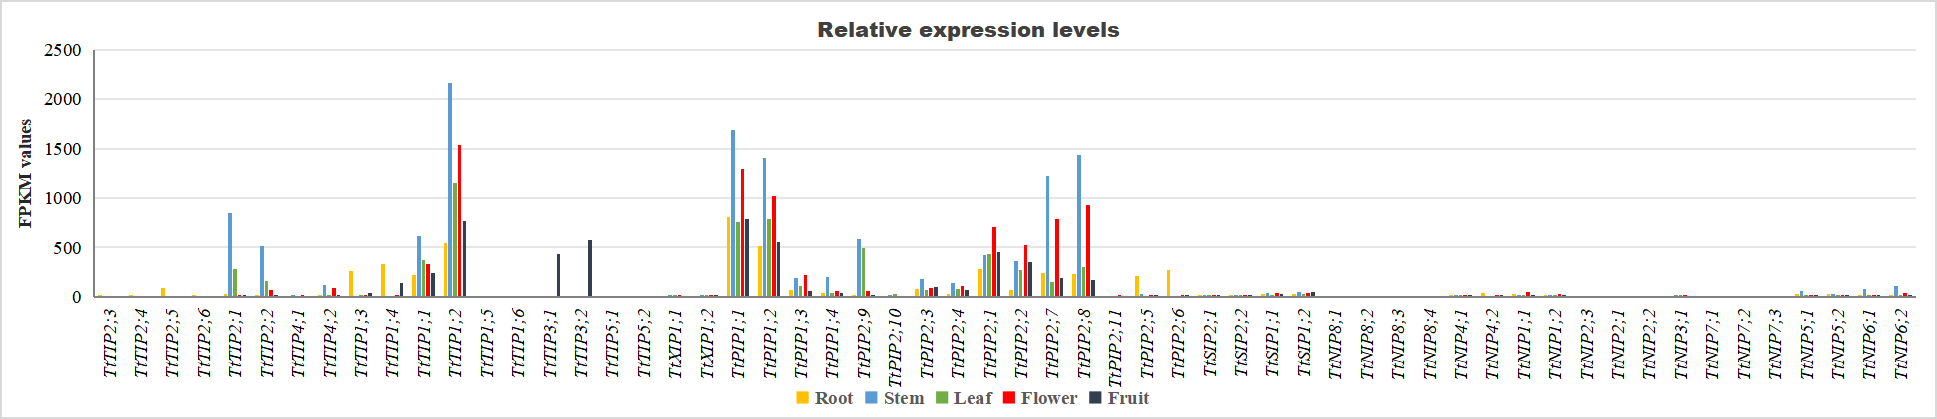


**Fig. S3.** The histogram showing the relative expression (FPKM values with RNA-seq) of 58 TtAQPs in the root, vine, leaf, flower bud, and young fruit of *T. tetragonoides* plants.


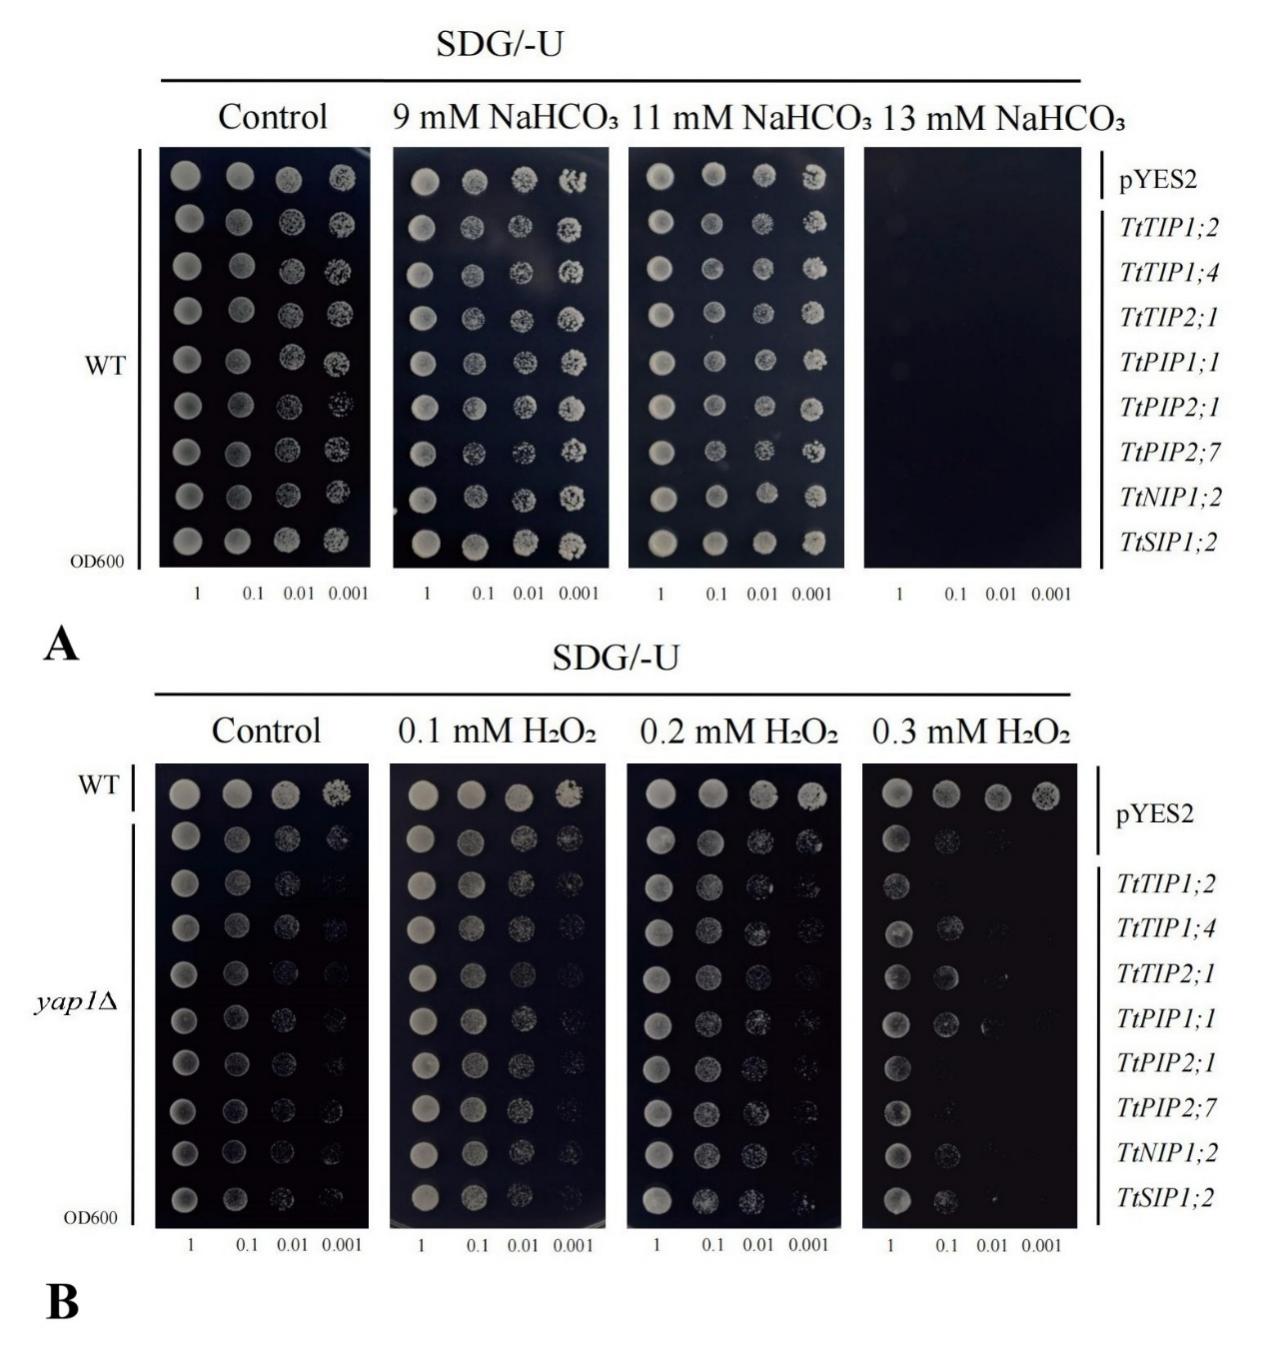


**Fig. S4.** 10 The tolerance confirmations of the eight *TtAQPs*’ heteroexpression in WT and H2O2-sensitive mutant strain (*yap1Δ*) yeast. (A) Alkaline stress (NaHCO3, pH8.2) tolerance confirmations in WT; and (B) Oxidative stress (H2O2) tolerance confirmations in *yap1Δ*. WT was used as control.

**Table S1.** Primers and sequences lists used in this study.

**Table S2.** Duplication events for *TtAQP* genes.

**Table S3.** Ka Ks analysis of *TtAQP*s.

**Table S4.** The *cis*-acting elements (CEs) analysis of *TtAQPs*’ promoter sequences

**Table S5.** The FPKM values for all *T. tetragonoides* samples’ RNA-seq assays in this study.
