# Supplementary material for: Molecular characterization of Tetragonia tetragonoides (Pall.) aquaporin (AQP) members and their roles in the response to combined high salinity-alkalinity-drought and heat stress
Source: Research Square preprint supplement (doi:10.21203/rs.3.rs-7136705/v1), 2025-07-30
Supplement: Supplementary file 5 [file d0e4c094d1ac9fcbccad8beb.xlsx]

## Sheet: Different organs
TtAQPs' expression in different organs (FPKM values)
Genes	Tt-Root-1	Tt-Root-2	Tt-Root-3	Root-average	Tt-Stem-1	Tt-Stem-2	Tt-Stem-3	Stem-average	Tt-Leaf-1	Tt-Leaf-2	Tt-Leaf-3	Leaf-average	Tt-Flower-1	Tt-Flower-2	Tt-Flower-3	Flower-average	Tt-Fruit-1	Tt-Fruit-2	Tt-Fruit-3	Fruit-average
TtPIP1;1	830.38	793.362	796.438	806.727	1021.75	1547.32	2497.46	1688.84	471.2	816.269	965.413	750.961	1111.55	1405.8	1374.84	1297.4	413.844	1009.3	949.391	790.843
TtPIP1;2	389.866	505.965	640.431	512.087	860.342	1333.54	2011.67	1401.85	568.25	859.518	937.708	788.492	876.397	1125.53	1049.69	1017.21	367.757	652.667	635.529	551.984
TtPIP1;3	15.7722	59.2376	128.377	67.7957	70.359	187.439	311.436	189.745	32.9077	135.571	142.578	103.685	170.201	211.74	264.281	215.407	49.6723	58.0701	77.1639	61.6354
TtPIP1;4	25.7087	34.5131	63.1532	41.125	91.3056	191.047	312.122	198.158	22.0421	43.5642	50.1363	38.5809	55.097	53.6176	68.146	58.9535	31.2967	27.9969	38.2878	32.5272
TtPIP2;1	188.992	301.665	342.481	277.713	246.643	424.839	608.187	426.557	198.043	540.596	572.349	436.996	415.109	875.957	809.879	700.315	244.456	566.161	560.103	456.907
TtPIP2;2	8.08552	78.8562	122.873	69.9383	149.264	409.354	532.052	363.557	45.7839	374.416	382.486	267.562	131.016	769.404	675.597	525.339	81.8368	492.962	466.169	346.989
TtPIP2;3	99.8978	42.0884	92.4186	78.1349	269.949	91.3141	164.476	175.246	53.3896	69.2381	76.732	66.4533	96.221	82.3987	83.239	87.2862	93.2398	102.388	111.909	102.512
TtPIP2;4	11.3092	21.7166	57.7476	30.2578	96.6192	133.148	180.223	136.663	49.3972	87.3332	89.5326	75.421	103.405	102.146	105.795	103.782	45.6566	67.3524	74.3362	62.4484
TtPIP2;5	185.593	254.332	200.335	213.42	17.9203	31.0191	34.3638	27.7678	1.52341	0.273561	0.143482	0.646818	3.94846	4.82251	3.84015	4.20371	8.03357	8.14837	10.875	9.01898
TtPIP2;6	212.908	328.851	257.833	266.53	9.39957	9.62663	13.2815	10.7692	1.92431	0.429881	0.0717409	0.808644	6.07456	4.62487	5.64266	5.44736	5.92375	3.39515	7.46642	5.59511
TtPIP2;7	137.763	266.53	328.247	244.18	809.519	1175.2	1687.34	1224.02	151.519	134.982	168.819	151.773	866.772	693.84	803.285	787.966	213.214	149.693	216.531	193.146
TtPIP2;8	198.761	233.054	254.176	228.664	1241.67	1290.14	1767.34	1433.05	239.454	318.194	341.276	299.642	978.886	850.655	941.689	923.743	175.031	110.29	213.609	166.31
TtPIP2;9	0.0832252	1.71199	3.33771	1.71098	812.415	472.595	464.574	583.195	519.72	494.726	468.992	494.479	89.2163	50.1063	45.9858	61.7695	8.82352	7.02127	7.31404	7.71961
TtPIP2;10	0	0	0	0	8.89807	13.3703	9.001	10.4231	12.8087	29.9403	28.3287	23.6925	0.195254	0.533638	0.66125	0.463381	0.0456453	0	0.0913013	0.0456489
TtPIP2;11	1.08934	0.191524	0.787634	0.689499	0.0376862	0.351658	0.670759	0.353368	0.158162	0	0.813718	0.32396	0.0427953	1.98835	1.73918	1.25677	0.120053	0.334864	0.16009	0.205003
TtTIP1;1	259.449	160.293	229.39	216.377	784.965	405.477	665.489	618.644	344.752	387.245	387.441	373.146	384.503	290.032	305.806	326.781	286.607	208.59	231.677	242.291
TtTIP1;2	695.433	475.308	449.796	540.179	1891.76	1785.38	2807.05	2161.4	559.658	1442.85	1454.69	1152.4	1514.34	1413.47	1671.42	1533.08	508.899	777.447	1000.48	762.276
TtTIP1;3	362.575	276.696	153.023	264.098	9.43854	13.4387	12.2499	11.709	5.97829	2.17984	2.1233	3.42714	2.5684	4.90469	1.51661	2.99656	40.598	25.422	32.5653	32.8618
TtTIP1;4	486.463	324.995	177.992	329.817	15.18	8.97414	11.0204	11.7248	2.09925	0.088973	0.734989	0.974403	3.65502	2.60984	11.0623	5.77572	169.551	120.368	127.906	139.275
TtTIP1;5	0	0	0	0	0	0	0	0	0	0	0	0	0	0	0	0	0	0	0	0
TtTIP1;6	0	0	0	0	0.0434956	0	0	0.0144985	0	0	0	0	0.296353	0	0	0.0987844	0	0	0	0
TtTIP2;1	0.49133	24.9866	41.2564	22.2448	392.711	793.934	1352.29	846.312	49.9393	361.338	436.668	282.649	5.36987	7.04088	7.6142	6.67498	0.656999	2.39979	2.58137	1.87939
TtTIP2;2	0.540463	18.2486	31.281	16.69	191.361	481.254	857.664	510.093	74.8857	185.822	224.039	161.582	85.2153	67.8942	59.282	70.7972	2.44028	9.07556	7.41557	6.31047
TtTIP2;3	2.53456	11.1404	9.04074	7.57191	0.0438422	0.636377	0.091803	0.257341	0.0459994	0.0896819	0.0411581	0.0589465	0.0995716	0.181423	0.449615	0.243536	0.232773	0.0432848	0.0931201	0.123059
TtTIP2;4	0.540463	3.36898	2.40149	2.10364	0	0	0	0	0	0	0	0	0	0	0	0	0	0	0.187736	0.0625787
TtTIP2;5	61.9992	106.447	106.656	91.7008	1.1399	0.272733	1.00983	0.807487	0	0	0	0	0	0	0.0449615	0.0149872	0	0	0	0
TtTIP2;6	15.8897	22.448	14.5385	17.6254	0.0438422	0.454555	0.642621	0.380339	0.78199	0.672614	0.0823162	0.512307	0	0	0.134884	0.0449615	0.418991	0.562703	0.27936	0.420351
TtTIP3;1	0	0	0.0594287	0.0198096	0.0426526	0.132667	0.178624	0.117981	0	0	0.28029	0.09343	0.09687	0	0.0437416	0.0468705	389.28	476.858	422.891	429.676
TtTIP3;2	0	0	0.416001	0.138667	0.127958	0.221111	0.0893122	0.146127	0	0	0	0	0	0.353001	0	0.117667	517.183	640.036	552.485	569.901
TtTIP4;1	0	0.120528	0.264355	0.128294	20.0166	5.16371	6.0586	10.413	0.597199	0.630673	0.0890576	0.438976	13.0887	4.75981	7.39384	8.41412	0.705141	0.0468297	0.80597	0.519314
TtTIP4;2	0.0485481	1.38703	7.05787	2.83115	106.201	92.316	167.744	122.087	24.8327	12.8183	17.0948	18.2486	80.68	79.0123	110.883	90.1917	22.0257	13.4513	28.6599	21.379
TtTIP5;1	0.0477895	0	0	0.0159298	0	0	0	0	0	0	0	0	0.14644	0.222349	0.484917	0.284569	0	0	0	0
TtTIP5;2	0	0	0	0	0	0	0.0556583	0.0185528	0	0	0	0	0.36221	1.04493	0.490667	0.632603	0	0	0	0
TtNIP1;1	21.0676	18.6259	29.8336	23.1757	28.7233	15.1222	11.7556	18.5337	11.585	2.51809	0.94552	5.0162	46.6385	39.0153	47.7427	44.4655	9.46699	5.22969	4.87271	6.52313
TtNIP1;2	6.42809	8.29396	23.2328	12.6516	13.9513	5.76268	2.49953	7.40451	8.76702	0.648598	1.57587	3.66383	27.9577	26.8206	30.3365	28.3716	4.35719	3.60922	5.03117	4.33253
TtNIP2;1	0	0	0	0	0	0	0	0	0	0	0	0	0	0	0	0	0	0	0	0
TtNIP2;2	0	0	0	0	0	0	0	0	0	0	0	0	0	0	0	0	0	0	0	0
TtNIP2;3	0.0427766	0	0	0.0142589	0	0	0	0	0	0	0	0	0	0	0	0	0	0	0	0
TtNIP3;1	0	0	0	0	1.82772	2.44768	2.1129	2.12943	11.0664	31.779	21.2691	21.3715	1.51338	2.87561	1.17149	1.8535	0.202166	0.0375934	0	0.0799198
TtNIP4;1	17.0348	5.48631	3.78463	8.76859	2.22874	2.09412	0.583356	1.6354	5.04218	1.35346	0.0653841	2.15367	11.2308	8.06987	7.71402	9.00489	25.2933	14.5089	17.3819	19.0614
TtNIP4;2	68.6565	20.7274	15.5471	34.977	1.57755	1.117	0.644547	1.11303	0.403701	0.472241	0.0722425	0.316062	3.36437	1.07474	1.45999	1.96637	2.2063	3.11499	5.02604	3.44911
TtNIP5;1	10.8617	37.2833	47.423	31.856	56.2916	38.5065	72.8204	55.8728	7.73424	6.99835	9.70157	8.14472	15.1797	18.7549	22.3536	18.7627	16.8162	18.5253	13.9714	16.4377
TtNIP5;2	11.3235	27.4195	36.1234	24.9555	34.2952	15.5448	28.2625	26.0342	4.96957	1.67551	2.50745	3.05084	7.11759	8.32637	9.16705	8.20367	28.5134	15.8221	16.1872	20.1742
TtNIP6;1	0.0397211	6.71826	10.3545	5.70416	60.274	70.6416	108.741	79.8857	3.86111	11.4743	11.5717	8.96905	10.7922	15.5979	13.9235	13.4379	1.25199	2.01064	2.011	1.75787
TtNIP6;2	0.561566	11.5976	28.1014	13.4202	79.3037	97.2973	146.717	107.773	9.3881	11.6241	15.0388	12.017	30.1958	40.9461	39.0731	36.7383	5.21045	6.66118	10.2689	7.38016
TtNIP7;1	0	0	0	0	0	0	0	0	0	0	0	0	0	0	0	0	0	0	0	0
TtNIP7;2	0	0	0	0	0	0	0	0	0	0	0	0	0	0	0	0	0	0	0	0
TtNIP7;3	0.0481658	0.77062	0.78474	0.534508	0.0433243	0	0	0.0144414	0	0	0	0	0	0	0	0	0	0	0	0
TtNIP8;1	0	0	0	0	0	0	0	0	0	0	0	0	0	0	0	0	0	0	0	0
TtNIP8;2	0	0	0	0	0.202535	0.34998	0.424096	0.325537	0	0	0	0	0	0	0	0	0.0716883	0.0333267	0.107545	0.0708534
TtNIP8;3	0	0	0	0	0.287071	0	0	0.0956903	0.0501994	0	0	0.0167331	0	0	0	0	0	0	0.0508112	0.0169371
TtNIP8;4	0	0	0	0	0	0	0	0	0	0	0	0	0	0	0	0	0.203221	1.08645	0.0508112	0.446827
TtSIP1;1	38.2746	23.8636	24.1997	28.7793	44.592	28.867	34.425	35.9614	17.5274	13.2891	14.2721	15.0296	37.037	30.1295	39.8839	35.6835	32.2868	28.3175	31.6805	30.7616
TtSIP1;2	44.2688	21.9545	27.648	31.2904	50.4257	40.1847	54.8302	48.4802	41.0365	24.273	22.4869	29.2654	39.2452	28.1635	40.6997	36.0361	53.7801	35.9095	46.2769	45.3222
TtSIP2;1	8.31292	16.192	15.5292	13.3447	11.4276	16.6752	20.2361	16.113	6.4637	8.60965	7.77009	7.61448	10.8407	11.7735	16.3493	12.9878	6.34197	8.26444	6.49254	7.03298
TtSIP2;2	7.11042	19.8964	17.757	14.9213	11.2395	18.528	17.3312	15.6996	7.64789	6.49331	8.43231	7.52451	12.5496	14.4493	13.2627	13.4205	8.63906	7.38228	6.34271	7.45468
TtXIP1;1	0	0	0	0	0.0445521	10.2545	3.82488	4.70799	1.16861	18.0446	9.07595	9.42971	0.404736	13.5966	2.74138	5.58091	0	1.40754	1.18285	0.863465
TtXIP1;2	0	0	0	0	1.57205	10.5944	1.89636	4.6876	5.09165	16.7428	2.69496	8.17647	1.20305	34.6478	4.38095	13.4106	0	9.5486	2.68573	4.07811

## Sheet: Root-abiotic stresses
TtAQPs' expression in roots after different abiotic stress challenges (FPKM values)
Genes	Root-CK-1	Root-CK-2	Root-CK-3	Root-CK	Root-H-2h-1	Root-H-2h-2	Root-H-2h-3	Root-Heat-2h	Root-S-2h-1	Root-S-2h-2	Root-S-2h-3	Root-Salt-2h	Root-S-2d-1	Root-S-2d-2	Root-S-2d-3	Root-Salt-2d	Root-A-2h-1	Root-A-2h-2	Root-A-2h-3	Root-Alkali-2h	Root-A-2d-1	Root-A-2d-2	Root-A-2d-3	Root-Alkali-2d	Root-HO-2h-1	Root-HO-2h-2	Root-HO-2h-3	Root-osmotic-2h	Root-HO-2d-1	Root-HO-2d-2	Root-HO-2d-3	Root-osmotic-2d
TtPIP1;1	1513.82	1788.67	1755.46	1685.98	506.831	481.296	442.915	477.014	979.098	912.811	913.564	935.158	1014.07	987.268	1011.63	1004.32	737.026	895.606	901.448	844.693	1149.17	1012.23	1001.86	1054.42	602.775	576.627	554.546	577.982	749.496	660.375	798.237	736.036
TtPIP1;2	1357.99	1527.58	1520.86	1468.81	446.474	411.214	386.047	414.578	876.215	821.778	809.019	835.671	834.488	808.644	837.968	827.033	628.515	634.664	658.84	640.673	644.165	627.342	559.679	610.396	458.516	417.795	421.143	432.485	234.086	204.257	259.749	232.697
TtPIP1;3	127.702	140.818	137.948	135.489	257.266	262.88	247.097	255.748	85.8548	84.9602	85.4002	85.405	51.2175	54.5703	59.0383	54.942	53.2405	50.6189	52.7775	52.2123	2.74892	4.35762	3.00001	3.36885	27.1382	26.646	26.8771	26.8871	45.4215	46.6354	51.985	48.014
TtPIP1;4	103.586	113.071	105.84	107.499	133.946	138.205	133.446	135.199	65.1882	60.9891	63.6991	63.2921	26.8021	27.8241	36.4535	30.3599	43.3272	48.7413	52.8489	48.3058	22.0683	22.917	16.9683	20.6512	33.3214	31.5873	27.6789	30.8625	21.3875	20.2867	21.3163	20.9968
TtPIP2;1	762.397	788.974	814.304	788.558	82.9243	78.5572	76.5995	79.3604	469.575	454.763	444.823	456.387	345.289	339.88	343.842	343.004	271.173	261.662	272.891	268.575	61.4943	62.4031	53.6315	59.1763	168.346	161.543	152.046	160.645	100.353	96.3965	114.309	103.686
TtPIP2;2	299.317	311.797	317.622	309.579	35.8904	35.9769	38.2407	36.7026	167.403	152.375	153.024	157.601	162.523	157.604	163.864	161.33	72.8612	65.8952	60.0596	66.272	3.20057	3.84663	1.98616	3.01112	48.1284	48.8636	49.585	48.859	22.0013	20.4062	22.1178	21.5084
TtPIP2;3	49.0783	54.4286	47.6602	50.389	75.2511	65.7606	75.632	72.2146	86.3353	75.5363	65.7474	75.873	40.8563	60.5962	54.8689	52.1071	159.856	161.843	168.516	163.405	389.592	349.156	368.693	369.147	143.959	136.743	147.066	142.59	440.681	410.964	470.721	440.789
TtPIP2;4	42.5606	40.1969	39.6066	40.788	54.2066	53.6489	47.901	51.9188	46.7425	38.818	41.4204	42.327	28.7825	25.2827	31.6443	28.5699	26.0649	32.1976	29.4159	29.2261	30.3834	33.5859	28.4221	30.7971	24.5437	20.8552	24.2743	23.2244	38.8381	38.1283	42.0778	39.6814
TtPIP2;5	417.694	454.714	438.901	437.103	20.8527	22.8804	20.4585	21.3972	203.109	194.547	175.955	191.204	126.161	132.311	129.213	129.228	102.475	82.9762	92.3113	92.5874	12.7523	10.4541	14.042	12.4161	44.3131	42.293	45.0219	43.876	8.83708	8.61028	10.1608	9.20271
TtPIP2;6	1136.42	1243.46	1256.66	1212.18	246.115	242.172	254.423	247.57	585.562	546.878	546.763	559.735	678.04	625.116	577.031	626.729	400.176	321.778	364.079	362.011	22.1984	16.0029	18.3905	18.8639	168.636	181.097	155.449	168.394	25.1033	29.7496	29.3533	28.0688
TtPIP2;7	381.178	423.252	425.093	409.841	531.433	478.727	515.451	508.537	232.787	245.259	253.975	244.007	158.263	140.606	171.47	156.78	106.402	118.132	104.924	109.82	21.17	13.4556	8.91136	14.5123	69.4618	65.0091	62.0126	65.4945	51.4301	47.072	69.3691	55.9571
TtPIP2;8	293.807	345.495	327.759	322.354	538.038	506.585	536.347	526.99	173.939	190.715	196.254	186.969	86.3916	83.5242	102.428	90.7814	113.002	108.591	96.3067	105.967	9.10021	6.93167	6.79836	7.61008	70.71	66.5864	63.5132	66.9366	49.8201	50.2624	60.2881	53.4569
TtPIP2;9	5.29776	4.38797	6.37185	5.35253	2.16374	1.25918	1.69716	1.7067	4.85277	4.05017	3.57286	4.1586	5.97292	5.03371	6.42029	5.80897	1.76243	2.14681	1.6868	1.86535	0	0.315101	0	0.105034	1.27673	2.6846	1.23213	1.73115	7.33621	8.59676	8.82234	8.25177
TtPIP2;10	1.21683	1.4398	1.20474	1.28712	0.168469	0.454486	0.16588	0.262945	1.04758	0.838085	0.870378	0.91868	0.385367	1.05708	0.654639	0.699028	1.16275	0.170033	0.29479	0.542523	0	0	0	0	0.692392	0.12499	0.332947	0.383443	0.303306	0.0310467	0.115463	0.149939
TtPIP2;11	5.03976	5.45756	5.35928	5.28553	12.4806	11.1929	9.52558	11.0664	2.64506	4.48203	5.23249	4.11986	3.71641	5.64741	5.2862	4.88334	8.83474	10.2113	8.27026	9.10544	3.35402	2.1415	4.46763	3.32105	2.53524	2.52035	3.64874	2.90144	0.0886375	0.136095	0.151842	0.125525
TtTIP1;1	476.871	509.266	514.022	500.053	79.7281	66.6855	72.365	72.9262	324.707	287.463	301.234	304.468	126.477	126.717	122.245	125.147	199.518	191.925	186.686	192.71	59.8294	56.2714	56.1568	57.4192	176.927	173.57	169.262	173.253	386.783	372.436	481.626	413.615
TtTIP1;2	853.837	832.714	867.813	851.454	248.113	227.739	212.948	229.6	539.627	489.693	530.848	520.056	205.709	194.635	207.658	202.667	286.208	279.832	286.493	284.178	8.18271	3.07593	5.29973	5.51946	331.411	322.975	304.938	319.775	303.812	310.405	393.903	336.04
TtTIP1;3	806.05	961.88	993.369	920.433	698.701	691.151	679.359	689.737	344.584	341.287	329.13	338.333	360.847	344.616	328.098	344.52	172.166	190.932	175.86	179.653	273.554	222.354	211.1	235.669	184.629	185.156	157.709	175.831	156.998	149.503	143.821	150.107
TtTIP1;4	836.109	1008.8	1021.59	955.499	898.914	860.719	847.709	869.114	438.585	410.061	417.451	422.032	866.985	759.994	769.501	798.827	271.038	274.247	273.954	273.08	681.734	634.472	519.138	611.782	325.656	315.633	277.644	306.311	143.46	145.231	126.179	138.29
TtTIP1;5	0	0	0	0	0	0	0	0	0	0	0	0	0	0.039517	0	0.0131723	0	0	0	0	0	0.108224	0	0.0360746	0	0	0	0	0	0	0	0
TtTIP1;6	0	0	0	0	0	0	0	0	0	0	0.041938	0.0139793	0	0.0334254	0.0348632	0.0227629	0	0	0	0	0	0	0	0	0.0412119	0	0	0.0137373	0	0	0	0
TtTIP2;1	354.087	367.588	381.812	367.829	608.73	573.926	573.493	585.383	187.101	160.008	170.66	172.589	51.6645	50.0606	49.4509	50.392	190.384	191.726	184.617	188.909	6.22762	7.1619	5.97264	6.45405	149.909	155.618	150.444	151.99	67.5292	71.4677	62.8269	67.2746
TtTIP2;2	382.429	359.054	374.793	372.092	375.726	319.905	325.652	340.427	209.245	177.757	194.267	193.756	31.3395	33.2831	35.7421	33.4549	219.428	201.21	202.975	207.871	17.481	12.4636	12.6788	14.2078	163.936	169.197	173.165	168.766	33.6087	27.355	26.3831	29.1156
TtTIP2;3	210.468	256.725	231.185	232.793	37.2001	33.5855	33.9637	34.9165	184.114	152.621	142.626	159.787	145.858	130.252	133.922	136.678	107.874	100.801	108.84	105.838	19.8346	20.115	20.4778	20.1425	63.5566	50.7796	56.2005	56.8456	29.6631	24.4772	27.8805	27.3402
TtTIP2;4	40.3352	48.109	47.6175	45.3539	2.98779	2.63366	4.6473	3.42292	37.8682	25.3755	26.2062	29.8166	12.9954	13.7887	18.4909	15.0917	13.3711	11.1443	11.8633	12.1263	2.18513	1.48819	1.8861	1.85314	4.64801	6.98206	7.87307	6.50104	0.970148	1.43638	1.09806	1.16819
TtTIP2;5	483.118	520.232	504.101	502.484	96.1791	101.009	94.7431	97.3106	494.433	480.087	462.12	478.88	174.747	160.979	162.07	165.932	327.091	323.212	356.327	335.543	14.1985	13.3792	16.2159	14.5979	120.716	118.047	110.151	116.305	16.6017	14.4076	11.0698	14.0264
TtTIP2;6	346.472	411.434	379.043	378.983	70.4483	69.1938	67.2084	68.9502	302.968	301.652	299.499	301.373	138.509	137.665	127.456	134.543	173.538	174.374	178.894	175.602	3.79351	5.81305	6.54873	5.3851	88.2315	82.7771	91.7714	87.5934	3.50595	3.26151	1.91365	2.8937
TtTIP3;1	0	0	0	0	0	0	0	0	0	0	0	0	0.344142	0.0655553	0.376063	0.26192	0	0	0	0	0	0	0	0	0	0	0	0	0	0	0	0
TtTIP3;2	0.0416344	0.0420188	0	0.0278844	0	0	0	0	0	0	0.0411253	0.0137084	2.02661	1.80277	1.33332	1.7209	0.256385	0.126536	0	0.12764	0	0	0	0	0	0	0	0	0.133758	0	0	0.044586
TtTIP4;1	2.22241	1.12147	0.93548	1.42645	0.0929485	0	0.0457599	0.0462361	1.3409	1.24846	1.46349	1.35095	0.0850465	0.109353	0.0380189	0.0774728	0.855353	0.32834	0.232347	0.472013	0	0	0.112461	0.037487	0.0898846	0.689602	0.0918475	0.290445	0.037187	0	0	0.0123957
TtTIP4;2	45.5668	47.6654	39.0276	44.0866	2.56715	2.3085	1.68513	2.18693	40.8229	33.4595	51.8727	42.0517	8.26031	5.43641	7.31533	7.00401	6.73722	4.62058	6.11772	5.82518	0	0.0919044	0	0.0306348	5.58568	6.05244	7.8639	6.50067	0.684713	0.0946185	0.909044	0.562792
TtTIP5;1	0.0419596	0	0	0.0139865	0	0	0	0	0	0	0	0	0	0	0	0	0	0	0	0	0	0	0	0	0	0	0	0	0	0	0	0
TtTIP5;2	0	0	0	0	0	0	0	0	0	0	0	0	0	0	0	0	0	0	0	0	0	0	0	0	0	0	0	0	0	0	0	0
TtNIP1;1	19.2986	24.4746	19.7864	21.1866	28.8008	32.1616	29.1138	30.0254	21.9634	20.764	18.0196	20.249	29.1949	32.5079	27.5376	29.7468	53.9642	45.0409	46.1933	48.3995	19.735	21.1187	15.4777	18.7772	35.8746	34.9623	33.6965	34.8445	2.45661	1.7243	2.60517	2.26203
TtNIP1;2	28.5474	31.6406	26.4852	28.891	152.703	144.387	145.785	147.625	34.3633	33.237	35.1759	34.2588	153.198	134.618	127.163	138.326	107.592	99.1564	113.875	106.875	13.4641	11.6192	8.93285	11.3387	93.9102	87.0622	75.5553	85.5092	5.84907	5.65786	7.4147	6.30721
TtNIP2;1	0	0	0	0	0	0	0	0	0	0	0	0	0	0	0	0	0	0.0380494	0	0.0126831	0	0	0	0	0	0	0	0	0	0	0.0516759	0.0172253
TtNIP2;2	0	0	0	0	0	0	0	0	0	0	0	0	0	0	0	0	0	0	0	0	0	0	0	0	0	0	0	0	0	0	0	0
TtNIP2;3	0	0	0	0	0.301595	0	0.22272	0.174772	0.0375076	0	0	0.0125025	0.0344944	0	0.339246	0.12458	0.0770947	0.0380494	0.150782	0.0886419	0.190244	0.161957	0.0912272	0.147809	0.291653	0.0745863	0	0.12208	0.120663	0.13895	0.155028	0.138214
TtNIP3;1	0.297347	0.150046	0.355724	0.267706	0	0	0.183673	0.0612243	0.111355	0.334074	0	0.148476	0	0	0	0	0.190736	0.0376544	0	0.0761302	0.0941344	0	0	0.0313781	0.216469	0.295248	0.147465	0.219727	0	0.110006	0	0.0366687
TtNIP4;1	5.9827	3.7051	5.34987	5.01256	1.8425	2.7447	2.55329	2.38016	5.29569	3.59846	4.96939	4.62118	10.6147	9.63414	9.43447	9.89443	3.76788	3.65033	6.07277	4.497	6.37076	4.8372	10.0731	7.09369	2.37568	3.57778	3.43905	3.13084	1.91113	3.32003	2.15142	2.46086
TtNIP4;2	1.76524	1.78154	1.55764	1.70147	7.31368	6.65693	5.19679	6.38914	0.93769	0.900208	1.29847	1.04546	16.6608	16.5584	16.9315	16.7169	4.97261	5.74546	4.74962	5.1559	241.134	243.908	273.499	252.847	2.98945	1.82736	2.64495	2.48725	24.3739	33.2369	22.8407	26.8172
TtNIP5;1	68.6503	70.6393	77.4694	72.253	79.7248	81.0235	82.8548	81.201	81.8291	76.0895	82.5361	80.1516	42.8449	46.9181	47.24	45.6677	29.6461	34.7391	33.552	32.6458	4.18536	3.56306	4.43212	4.06018	91.6004	87.3095	84.3467	87.7522	14.1854	13.6032	12.1503	13.313
TtNIP5;2	62.5033	59.9931	65.2832	62.5932	25.4372	23.9954	23.3971	24.2766	58.8432	57.4215	57.9276	58.0641	52.6154	46.142	45.672	48.1431	17.5536	17.0451	19.3288	17.9759	1.23258	1.19922	2.11092	1.51424	43.8322	41.3172	44.6861	43.2785	58.8561	60.8057	63.9002	61.1873
TtNIP6;1	16.252	17.0004	18.2467	17.1664	2.38045	1.92311	1.89577	2.06644	5.67704	7.59283	5.9597	6.40986	8.68026	6.94652	9.19268	8.27316	4.68901	4.16913	2.38019	3.74611	0.0883274	0	0.423555	0.170627	4.02846	2.87424	4.08185	3.66152	1.45657	1.49669	1.05566	1.33631
TtNIP6;2	32.6124	29.1459	31.7214	31.1599	4.27746	4.12681	2.40172	3.602	12.1692	10.5868	12.3845	11.7135	16.4315	16.5251	20.5906	17.8491	7.12077	7.56397	7.95311	7.54595	0.0891962	0	0.171088	0.0867616	6.08504	7.41363	5.06517	6.18795	3.9884	4.5603	4.65185	4.40018
TtNIP7;1	0	0	0	0	0	0	0	0	0	0	0	0	0.0388401	0	0	0.0129467	0	0	0	0	0	0	0	0	0	0	0	0	0	0	0	0
TtNIP7;2	0	0	0	0	0	0	0	0	0	0	0	0	0	0	0	0	0	0	0	0	0	0	0	0	0	0	0	0	0	0	0	0
TtNIP7;3	0	0.0426805	0.179885	0.0741885	0.0424489	0	0.208982	0.0838104	0.337864	0.168937	0.208865	0.238555	1.86433	1.96434	1.31959	1.71608	0	0.042843	0.0424444	0.0284291	0.428423	1.9148	0.513602	0.952274	0	0.167966	0.335569	0.167845	0.0679322	0	0.0581862	0.0420395
TtNIP8;1	0.197699	0	0	0.0658998	0	0	0	0	0	0	0	0	0	0	0	0	0	0	0	0	0	0	0	0	0	0	0	0	0	0	0	0
TtNIP8;2	0.16475	0.266033	0.035039	0.155274	0	0.129781	0	0.0432602	0	0	0	0	0	0	0.108226	0.0360752	0	0	0	0	0	0	0	0	0	0	0	0	0	0	0	0
TtNIP8;3	0	0	0	0	0	0	0	0	0.0466399	0	0	0.0155466	0	0	0	0	0	0	0	0	0	0	0	0	0	0	0	0	0	0	0	0
TtNIP8;4	0	0	0	0	0	0	0	0	0	0	0	0	0	0	0	0	0	0	0	0	0	0	0	0	0	0	0	0	0	0	0	0
TtSIP1;1	27.5228	28.5171	23.8546	26.6315	5.32606	5.13989	3.49613	4.65403	20.5066	18.87	23.266	20.8809	30.349	28.1209	26.8863	28.452	19.5254	20.3657	22.6442	20.8451	44.0303	49.3892	47.0476	46.8224	14.1534	15.1635	14.2058	14.5075	15.1066	13.1508	15.4322	14.5632
TtSIP1;2	20.5343	22.03	20.5517	21.0387	15.1555	10.1523	9.84886	11.7189	20.5927	16.3713	21.3059	19.4233	23.8116	21.5661	23.3794	22.919	20.7651	21.2398	25.8914	22.6321	36.6009	38.1348	34.8928	36.5428	15.5352	15.7203	16.4308	15.8954	12.9238	18.2579	16.2038	15.7952
TtSIP2;1	15.5616	14.8714	15.035	15.156	6.49686	4.38454	4.9452	5.27553	11.2773	7.931	8.84194	9.35008	4.38462	4.91497	6.18182	5.16047	19.1281	17.0208	19.6728	18.6072	0	0.593844	0	0.197948	10.3375	8.52356	8.78753	9.21619	4.9036	5.3326	6.2212	5.4858
TtSIP2;2	5.64626	5.93004	6.49239	6.0229	4.23909	2.80249	4.31004	3.78387	6.41797	8.16022	8.11645	7.56488	6.36613	4.62585	5.61641	5.53613	10.9303	9.02193	10.0437	9.99866	0	0	0.669	0.223	5.83712	7.4752	4.87185	6.06139	1.9172	2.64932	1.61057	2.05903
TtXIP1;1	0.0869771	0.219451	0	0.102143	0	0	0	0	0	0	0.0859136	0.0286379	2.19675	0.616273	2.32116	1.71139	0	0.484629	0	0.161543	0.110141	0	0	0.0367137	0	0	0.17254	0.0575132	0	0.386135	0.0299176	0.138684
TtXIP1;2	0.767262	0.875349	0.24832	0.63031	0	0.164241	0.329699	0.164647	0.333142	0.0666303	0.263611	0.221128	5.82119	6.17177	7.53295	6.50864	0.102713	0.405545	0.267848	0.258702	0	0	0	0	0.161904	0.695598	0.95955	0.605684	1.36645	0.814541	0.527832	0.902941

## Sheet: Stem-abiotic stresses
TtAQPs' expression in stems after different abiotic stress challenges (FPKM values)
Genes	Stem-CK-1	Stem-CK-2	Stem-CK-3	Stem-CK	Stem-H-2h-1	Stem-H-2h-2	Stem-H-2h-3	Stem-Heat-2h	Stem-S-2h-1	Stem-S-2h-2	Stem-S-2h-3	Stem-Salt-2h	Stem-S-2d-1	Stem-S-2d-2	Stem-S-2d-3	Stem-Salt-2d	Stem-A-2h-1	Stem-A-2h-2	Stem-A-2h-3	Stem-Alkali-2h	Stem-A-2d-1	Stem-A-2d-2	Stem-A-2d-3	Stem-Alkali-2d	Stem-HO-2h-1	Stem-HO-2h-2	Stem-HO-2h-3	Stem-osmotic-2h	Stem-HO-2d-1	Stem-HO-2d-2	Stem-HO-2d-3	Stem-osmotic-2d
TtPIP1;1	961.981	967.899	1094.29	1008.06	2784.04	2390.25	2716.85	2630.38	1586.76	1568	1500.23	1551.66	1841.1	1824.32	1859.29	1841.57	1258.74	1234.43	1306.14	1266.44	666.525	741.978	786.447	731.65	1388.97	1343.05	1338	1356.67	896.828	856.553	869.085	874.156
TtPIP1;2	919.075	883.304	978.358	926.912	2276.42	1958.84	2095.87	2110.37	1454.65	1445.57	1436.09	1445.44	1158.49	1195.76	1213.85	1189.37	996.514	949.072	1005.84	983.809	681.829	452.08	474.665	536.191	1515.62	1485.39	1533.64	1511.55	669.227	654.273	648.535	657.345
TtPIP1;3	112.609	111.22	126.922	116.917	441.304	437.945	445.286	441.511	38.3481	33.2317	42.4287	38.0028	81.54	75.8644	78.6587	78.6877	32.7325	32.1936	38.4375	34.4545	11.219	4.32978	3.66218	6.40367	39.6757	43.9174	42.9404	42.1778	59.3868	59.3593	57.0364	58.5942
TtPIP1;4	157.297	144.34	169.61	157.082	272.245	269.683	281.2	274.376	56.6003	55.9196	61.6001	58.04	34.2294	32.5821	33.2828	33.3648	65.6938	63.8093	76.4274	68.6435	11.2143	13.6614	14.4887	13.1215	70.0838	69.408	70.4914	69.9944	45.263	42.5753	47.5957	45.1447
TtPIP2;1	253.687	242.342	256.514	250.848	767.762	765.754	817.84	783.785	1044.48	1127.83	1007.39	1059.9	1368.09	1424.77	1452.38	1415.08	346.475	347.608	355.761	349.948	374.708	461.055	512.897	449.553	805.106	760.102	747.573	770.927	301.423	264.047	268.349	277.94
TtPIP2;2	104.451	99.5684	107.537	103.852	577.776	554.645	610.877	581.099	613.844	628.942	573.956	605.581	856.894	866.818	878.787	867.5	134.168	127.414	124.509	128.697	91.0461	182.949	204.081	159.359	519.161	495.791	499.503	504.819	102.646	100.281	90.537	97.8215
TtPIP2;3	85.7453	88.417	89.2745	87.8123	165.365	159.865	151.651	158.96	494.513	466.893	453.985	471.797	235.638	216.25	228.464	226.784	476.57	406.844	433.025	438.813	18.4327	27.77	25.3701	23.8576	335.513	323.668	327.503	328.895	138.503	136.224	125.345	133.357
TtPIP2;4	77.1175	79.2514	78.8628	78.4105	82.1437	73.7674	78.3914	78.1008	92.1244	86.9822	85.384	88.1635	28.2197	23.4075	25.4039	25.677	89.3317	92.7778	89.229	90.4462	15.776	15.2333	13.1604	14.7232	94.0296	98.1121	92.666	94.9359	102.647	83.8011	97.5686	94.6722
TtPIP2;5	20.07	19.8736	25.1557	21.6998	8.56459	7.60191	11.934	9.36682	3.1598	2.53072	2.60308	2.76453	2.24738	1.31782	2.79456	2.11992	3.14616	2.53755	2.66741	2.78371	0.524067	0.373391	0.0838958	0.327118	2.21294	2.7261	2.99059	2.64321	11.7535	12.5882	11.225	11.8556
TtPIP2;6	7.54892	8.15329	10.5802	8.76079	14.2253	12.8676	11.9703	13.0211	1.93305	1.98842	2.60308	2.17485	0.807653	1.42185	0.759016	0.996174	4.77349	7.35889	5.44152	5.85796	5.98309	0.663806	0.167792	2.27156	1.80724	2.39454	2.32601	2.17593	5.40736	6.4663	6.83262	6.23543
TtPIP2;7	825.514	859.368	870.79	851.891	2473.12	2322.92	2335.33	2377.12	304.07	283.693	326.121	304.628	631.863	659.326	592.849	628.012	285.456	264.571	280.669	276.898	41.4972	15.8192	14.4206	23.9123	311.109	333.869	329.255	324.744	397.822	394.49	400.693	397.668
TtPIP2;8	894.964	896.427	955.273	915.555	2430.97	2293.78	2347.76	2357.5	489.542	452.743	472.664	471.65	368.598	366.167	340	358.255	496.614	477.676	504.605	492.965	53.0562	50.108	47.218	50.1274	513.378	543.484	517.919	524.927	545.877	516.131	542.05	534.686
TtPIP2;9	260.491	255.046	282.045	265.861	199.087	184.498	191.324	191.636	208.733	200.167	210.152	206.351	62.4681	66.0069	58.6709	62.382	214.993	223.505	226.283	221.594	9.1979	4.26733	5.30084	6.25536	225.341	254.127	227.059	235.509	134.669	132.684	134.305	133.886
TtPIP2;10	76.4736	82.5111	84.7339	81.2395	62.3184	63.3276	62.2167	62.6209	30.9475	28.1045	31.46	30.1707	16.7895	22.4722	17.8541	19.0386	38.2421	41.6792	39.371	39.7641	0.147394	0.186696	0.0471914	0.127094	37.6754	38.17	36.0532	37.2995	8.78696	6.80109	9.84066	8.47624
TtPIP2;11	0.465344	0.1436	0.547303	0.385416	0.362544	0.109724	0.107657	0.193308	1.13661	1.24803	1.90722	1.43062	4.12148	4.89122	4.86602	4.62624	0.214004	0.0357541	0.280626	0.176795	14.7313	10.189	10.5916	11.8373	0.836675	0.581352	0.436981	0.618336	3.6296	5.84939	4.9617	4.81356
TtTIP1;1	312.06	316.572	312.758	313.797	848.349	810.577	841.03	833.319	542.751	502.181	483.949	509.627	435.738	444.373	427.334	435.815	320.257	321.811	294.642	312.237	52.767	87.9803	84.2838	75.0103	514.468	528.536	507.486	516.83	282.408	273.464	293.742	283.205
TtTIP1;2	1105.62	1087.59	1133.3	1108.84	2479.59	2402.24	2518.42	2466.75	1040.92	997.122	1030.65	1022.9	1069.08	1118.11	1046.68	1077.96	488.523	506.757	513.463	502.914	46.9695	110.337	100.282	85.8627	1028.27	1058.85	1008.45	1031.86	687.622	666.937	706.923	687.161
TtTIP1;3	13.8401	12.9274	15.9181	14.2285	721.708	637.071	747.874	702.217	89.1615	101.117	73.4447	87.9076	8.51429	11.6062	11.9784	10.6996	11.691	12.2559	10.5667	11.5045	7.30793	2.5975	3.82008	4.57517	46.1412	44.3677	45.5589	45.3559	7.43779	8.1884	7.05134	7.55918
TtTIP1;4	33.9185	31.1583	32.7205	32.5991	864.309	752.649	881.072	832.676	166.855	186.307	167.801	173.654	33.5775	44.6089	44.0256	40.7373	69.2404	67.0153	69.9996	68.7518	41.6105	190.279	168.656	133.515	189.267	162.039	168.03	173.112	21.544	19.9919	17.0942	19.5433
TtTIP1;5	0	0	0	0	0	0	0	0	0	0	0	0	0	0	0	0	0	0	0	0	0.0587738	0.0558342	0.0564532	0.0570204	0	0	0	0	0	0	0	0
TtTIP1;6	0	0	0	0	0.041843	0	0.0414174	0.0277535	0	0	0.0423312	0.0141104	0	0.0394769	0	0.013159	0	0.0412656	0	0.0137552	0.0497138	0.141682	0	0.0637986	0	0	0	0	0	0	0	0
TtTIP2;1	537.729	558.409	553.717	549.952	3849.66	3689.41	3547.07	3695.38	740.444	706.058	718.632	721.711	777.215	787.14	745.535	769.963	506.481	531.695	495.729	511.302	6.97072	14.1559	9.46102	10.1959	513.702	511.267	479.818	501.596	192.059	176.179	180.462	182.9
TtTIP2;2	356.177	341.091	334.43	343.899	1286.93	1329.48	1215.52	1277.31	416.035	383.241	424.65	407.975	34.6043	30.8053	31.1255	32.1783	373.472	397.356	356.566	375.798	3.93997	4.41471	3.92996	4.09488	339.268	343.728	326.555	336.517	43.6498	40.0065	45.072	42.9094
TtTIP2;3	0.874499	0.292349	0.551809	0.572886	0.253058	0.255293	0	0.16945	2.04739	1.03706	0.810702	1.29838	0.725251	0.875412	0.950075	0.850246	0.912858	2.78683	1.63233	1.77734	1.55341	0.476036	0.0481314	0.692525	2.11596	2.15575	0.50836	1.59336	0.301606	0.702438	0.172304	0.392116
TtTIP2;4	0	0	0.0427878	0.0142626	0	0	0	0	0.171986	0.0418157	0	0.0712673	0	0.0401111	0	0.0133704	0.0418268	0.0419285	0	0.0279184	0.20205	0.23993	0	0.147327	0	0.0426091	0.0427036	0.0284376	0.0868652	0	0	0.0289551
TtTIP2;5	1.54078	1.33645	0.806491	1.22791	0.379587	0.936075	0.125242	0.480301	1.83412	1.57633	1.53607	1.64884	0.24175	0.437706	0.118759	0.266072	0.995845	1.16464	1.59152	1.25067	4.05891	0.0952073	0.0481314	1.40075	0.338554	0.422696	0.296544	0.352598	0.818644	0.482926	0.904595	0.735388
TtTIP2;6	1.04107	0.542934	0.67915	0.754385	1.39182	1.10627	1.12718	1.20842	0.938387	2.6134	1.87741	1.80973	0.0402917	0.119374	0.118759	0.0928085	0.663897	0.956671	0.408082	0.676217	2.75605	0.0952073	0.192526	1.01459	0.380873	0.845392	0.762541	0.662935	0.258519	0.351219	0.387683	0.332474
TtTIP3;1	0	0	0	0	0	0	0	0	0	0	0	0	0.0783971	0.193559	0.0385124	0.10349	0	0	0	0	0	0	0	0	0	0	0	0	0	0	0	0
TtTIP3;2	0.040513	0	0	0.0135043	0	0	0	0	0.165987	0.201785	0	0.122591	7.48692	9.56183	12.7476	9.93212	0	0.0404659	0.158804	0.0664233	11.4563	2.77872	2.66906	5.63471	0.0411711	0.0411228	0	0.0274313	0.880268	1.58031	0.544794	1.00179
TtTIP4;1	7.34367	7.13914	6.70478	7.06253	5.15625	4.60334	3.52298	4.42752	40.1942	31.5505	36.561	36.1019	0.0871829	0.0430503	0.513942	0.214725	54.2292	49.5459	53.201	52.3254	0.0542138	0	0.0520732	0.035429	35.3003	38.0485	42.6245	38.6578	1.35184	0.522476	1.58453	1.15295
TtTIP4;2	59.8521	59.2361	63.925	61.0044	17.6858	20.0881	13.722	17.1653	69.6324	62.6792	64.3013	65.5376	1.12369	1.14937	0.473153	0.915406	98.776	85.013	99.8272	94.5387	1.59716	2.27591	0.239702	1.37092	80.9727	101.971	95.1081	92.6839	21.1574	19.7214	19.6934	20.1907
TtTIP5;1	0	0	0	0	0	0	0	0	0	0	0.0418351	0.013945	0	0	0	0	0	0	0	0	0	0	0	0	0	0	0	0	0	0.17218	0	0.0573932
TtTIP5;2	0	0	0	0	0	0	0	0	0	0	0	0	0	0	0	0	0	0	0	0	0	0	0	0	0	0	0	0	0	0	0	0
TtNIP1;1	25.2628	23.6307	25.7145	24.8693	10.6939	8.94204	10.6207	10.0855	20.2509	18.6006	20.875	19.9089	2.74257	2.77623	3.36821	2.96233	45.4371	44.0966	46.3185	45.2841	48.6476	30.5801	24.0801	34.4359	21.2443	23.629	24.5465	23.1399	12.3911	16.8094	12.498	13.8995
TtNIP1;2	13.7475	11.3001	12.7128	12.5868	3.87565	4.74254	4.61769	4.41196	10.0529	8.64734	8.78566	9.16197	1.64554	2.36995	1.54937	1.85496	18.2525	16.7397	18.7844	17.9255	38.415	29.4055	21.6639	29.8281	9.28987	9.42283	12.0029	10.2385	5.35237	5.56578	7.22026	6.04613
TtNIP2;1	0	0	0	0	0	0	0	0	0	0	0	0	0	0	0	0	0	0	0	0	0	0	0	0	0	0	0	0	0	0	0	0
TtNIP2;2	0	0	0	0	0	0	0	0	0	0	0	0	0	0	0	0	0	0	0	0	0	0	0	0	0	0	0	0	0	0	0	0
TtNIP2;3	0	0	0	0	0	0	0	0	0	0	0	0	0	0	0	0	0	0	0	0	0	0	0	0	0	0	0	0	0	0	0	0
TtNIP3;1	10.0183	9.21325	6.45148	8.56102	0.183154	0.332588	0.761421	0.425721	0.852046	1.1529	1.07469	1.02654	1.74969	1.93532	1.4784	1.72114	1.18924	0.867006	1.34681	1.13435	1.04451	1.36436	2.00653	1.4718	2.42582	2.42297	1.91324	2.25401	21.7791	22.4584	25.2531	23.1635
TtNIP4;1	14.0908	9.48759	9.77756	11.1187	1.40704	1.0139	1.06112	1.16069	2.16833	2.24058	2.50799	2.30563	16.0659	17.3836	18.1745	17.208	3.69135	4.42717	3.56555	3.89469	9.95063	12.4779	15.6747	12.7011	1.8824	1.14155	1.00948	1.34448	0.889819	1.67385	1.16332	1.24233
TtNIP4;2	2.96028	3.92188	3.2037	3.36195	16.2496	15.0861	19.5283	16.9547	10.5938	13.361	10.3728	11.4425	35.9267	38.0998	38.3204	37.449	18.0257	20.0773	18.6234	18.9088	10.5546	22.8526	19.5999	17.669	3.89973	3.93226	4.53584	4.12261	0.983157	0.886183	0.907306	0.925548
TtNIP5;1	61.6755	68.3062	63.6177	64.5331	46.3828	46.3474	44.4669	45.7324	59.7074	61.1044	59.1785	59.9967	19.8051	16.422	16.5603	17.5958	35.5174	36.6745	43.6963	38.6294	1.93502	3.44669	2.51687	2.63286	55.6641	58.8973	55.5176	56.693	48.6662	48.5988	47.9958	48.4203
TtNIP5;2	26.0463	29.1076	28.0318	27.7286	28.7782	25.3688	24.5179	26.2216	34.2666	37.1668	34.5902	35.3412	59.3702	57.4694	53.2503	56.6967	16.2796	18.2112	15.646	16.7123	7.20464	14.7326	10.7517	10.8963	30.6633	28.9105	26.7035	28.7591	34.8941	29.0287	31.0716	31.6648
TtNIP6;1	50.7346	52.414	53.0979	52.0821	65.7174	55.8954	53.8559	58.4896	56.0335	55.6101	50.6629	54.1022	4.10439	5.9018	4.25837	4.75485	34.457	28.2699	27.1037	29.9435	0.694218	1.55176	1.17672	1.1409	67.5954	78.7458	74.6396	73.6603	47.5075	43.1835	47.566	46.0857
TtNIP6;2	59.0472	66.2994	58.6503	61.3323	66.7803	68.1404	67.4409	67.4539	59.814	56.874	56.3932	57.6937	15.7169	14.3429	16.2237	15.4279	51.4597	50.7633	44.1954	48.8061	0.701046	2.50723	2.49542	1.90123	73.136	76.7027	68.436	72.7582	75.2776	75.7996	73.8765	74.9846
TtNIP7;1	0	0	0	0	0	0	0	0	0	0	0	0	0	0	0	0	0	0	0	0	0	0	0	0	0	0	0	0	0	0	0	0
TtNIP7;2	0	0	0	0	0	0	0	0	0	0	0	0	0	0	0	0	0	0	0	0	0	0	0	0	0	0	0	0	0	0	0	0
TtNIP7;3	0	0	0	0	0.0416782	0	0	0.0138927	0	0	0	0	0	0	0	0	0	0	0	0	0.495181	0	0	0.16506	0	0	0	0	0	0	0	0
TtNIP8;1	0.0320624	0	0.065363	0.0324751	0	0	0.192858	0.0642859	0	0	0	0	0	0	0	0	0	0.0320251	0	0.010675	0	0	0	0	0	0	0	0	0	0	0	0
TtNIP8;2	0.224437	0.353714	0.620948	0.3997	0.0324732	0	0	0.0108244	0.131364	0.159695	0.0657043	0.118921	0.0310221	0	0.487667	0.172896	0.0638949	0.128101	0.345618	0.179204	0	0	0.0741165	0.0247055	0	0.13018	0.358789	0.16299	0.364914	0.0338021	0.497487	0.298734
TtNIP8;3	0	0	0	0	0	0	0	0	0	0	0	0	0	0	0	0	0.0452821	0	0	0.015094	0	0	0	0	0	0	0	0	0.0470205	0	0	0.0156735
TtNIP8;4	0	0	0.0463225	0.0154408	0	0	0	0	0	0	0	0	0	0	0	0	0	0	0	0	0	0	0	0	0	0	0	0	0	0	0	0
TtSIP1;1	39.6685	41.2997	37.097	39.3551	61.3919	56.8729	60.1362	59.467	70.6004	72.2157	67.6997	70.1719	218.795	219.688	225.54	221.341	89.6349	92.4943	100.454	94.1944	83.3455	82.4879	87.8662	84.5665	61.3012	68.899	68.1123	66.1042	49.1657	44.0337	46.5917	46.5971
TtSIP1;2	37.9055	38.1001	42.8734	39.6263	47.7445	48.8524	40.189	45.5953	62.087	55.9912	59.0974	59.0586	74.0012	77.2138	80.5671	77.2607	76.0411	79.5384	88.7303	81.4366	40.3594	64.2533	62.5397	55.7175	43.683	47.1257	42.8317	44.5468	32.7482	31.1555	29.9611	31.2883
TtSIP2;1	8.9783	10.7068	10.5631	10.0827	2.85015	2.37328	2.59726	2.6069	8.51001	5.69551	9.47405	7.89319	5.57524	5.42065	7.38846	6.12812	5.83055	5.26471	7.87912	6.32479	2.41877	3.93178	3.40746	3.25267	6.5367	6.16631	7.77042	6.82447	4.85276	6.87541	6.19152	5.97323
TtSIP2;2	6.47688	5.42059	6.693	6.19682	0.542886	1.04972	0.716485	0.769697	3.79748	3.69318	1.78497	3.09188	1.94485	2.13412	1.65603	1.91167	2.53696	3.0339	4.2022	3.25769	0.591255	1.42974	1.03256	1.01785	3.85847	3.5819	2.63558	3.35865	2.26462	2.63714	4.62054	3.1741
TtXIP1;1	0	0.212202	0.258806	0.157003	0.428594	0.778282	0.424235	0.543704	0.0866894	0.88524	0.607033	0.526321	0.163777	0.242615	0.201138	0.20251	0.0421655	0.42268	0.331752	0.265533	4.37924	1.93498	2.20099	2.83841	0.473051	0.386587	0.947087	0.602242	0.175137	1.24917	1.44453	0.956279
TtXIP1;2	2.23979	1.82309	2.48156	2.18148	0.164383	0.232169	0.260338	0.218963	0.59848	0.291022	0.266082	0.385195	1.38193	1.64393	0.678871	1.23491	0.420476	0.713305	0.508962	0.547581	12.0307	3.5994	4.31464	6.64826	0.98964	0.395392	0.792537	0.725856	1.37703	1.84799	1.91394	1.71298

## Sheet: Leaf-abiotic stresses
TtAQPs' expression in leaves after different abiotic stress challenges (FPKM values)
Genes	Leaf-CK-1	Leaf-CK-2	Leaf-CK-3	Leaf-CK	Leaf-H-2h-1	Leaf-H-2h-2	Leaf-H-2h-3	Leaf-Heat-2h	Leaf-S-2h-1	Leaf-S-2h-2	Leaf-S-2h-3	Leaf-Salt-2h	Leaf-S-2d-1	Leaf-S-2d-2	Leaf-S-2d-3	Leaf-Salt-2d	Leaf-A-2h-1	Leaf-A-2h-2	Leaf-A-2h-3	Leaf-Alkali-2h	Leaf-A-2d-1	Leaf-A-2d-2	Leaf-A-2d-3	Leaf-Alkali-2d	Leaf-HO-2h-1	Leaf-HO-2h-2	Leaf-HO-2h-3	Leaf-osmotic-2h	Leaf-HO-2d-1	Leaf-HO-2d-2	Leaf-HO-2d-3	Leaf-osmotic-2d
TtPIP1;1	476.668	551.933	621.044	549.882	1381.7	1684.15	1771.26	1612.37	833.584	678.906	732.409	748.3	799.873	770.626	743.948	771.482	924.219	735.139	1072.13	910.497	957.605	902.07	776.735	878.803	450.648	433.82	404.842	429.77	243.009	233.381	206.821	227.737
TtPIP1;2	487.911	540.759	598.657	542.442	1133.64	1208.76	1304.43	1215.61	661.809	566.315	607.15	611.758	727.572	710.085	703.568	713.742	871.384	688.947	977.102	845.811	1086.45	1035.33	976.726	1032.83	412.918	404.609	424.451	413.993	330.481	315.465	305.856	317.267
TtPIP1;3	30.3636	34.1954	38.438	34.3324	453.517	473.809	515.478	480.935	21.5023	15.7843	17.6911	18.3259	47.722	36.5703	36.7801	40.3575	32.0869	32.9737	33.69	32.9169	16.7076	18.4666	18.6207	17.9316	8.02463	9.27244	8.9233	8.74013	28.4661	21.1905	22.9797	24.2121
TtPIP1;4	27.7845	29.2527	31.0148	29.3507	111.717	119.097	118.885	116.566	15.6961	15.657	15.0442	15.4658	30.2361	23.0531	24.0455	25.7782	21.8627	20.949	28.7829	23.8648	12.0138	17.5189	13.7329	14.4219	13.837	12.5463	10.0124	12.1319	15.0897	18.2908	12.6691	15.3499
TtPIP2;1	480.256	511.617	549.539	513.804	1030.32	1127.93	1097.1	1085.11	691.271	627.583	716.781	678.545	1240.93	1184.94	1184.05	1203.31	950.921	865.55	985.874	934.115	2087.51	2063.59	1984.34	2045.14	814.694	800.115	789.916	801.575	340.006	339.165	337.625	338.932
TtPIP2;2	210.26	216.563	217.954	214.926	973.116	970.62	1002.91	982.216	312.555	258.963	323.408	298.308	438.302	396.114	403.879	412.765	510.978	443.64	558.529	504.382	1087.32	1061.34	1020.06	1056.24	448.514	402.069	394.694	415.093	75.7036	83.8931	81.0788	80.2251
TtPIP2;3	40.1484	40.3319	44.5797	41.6867	47.974	49.1609	44.4193	47.1847	42.5961	40.7801	42.0193	41.7985	30.8119	26.0993	25.6239	27.5117	42.0955	34.7132	41.5038	39.4375	17.8471	19.5809	24.1267	20.5182	49.7749	49.3802	54.1783	51.1112	19.4973	22.1765	20.3772	20.6836
TtPIP2;4	53.5584	56.5407	60.6134	56.9042	19.5617	19.7481	18.1074	19.1391	18.8224	18.7955	20.2899	19.3026	23.0736	25.1979	23.7401	24.0039	14.9459	15.9328	17.3579	16.0789	15.2076	16.6823	16.2996	16.0631	22.9627	17.2405	17.9726	19.392	15.5442	17.5761	12.7263	15.2822
TtPIP2;5	5.76008	6.14027	4.07119	5.32385	0.33755	1.26145	0.883511	0.827503	1.67917	2.02961	3.27148	2.32675	1.49952	2.46046	1.41529	1.79176	0.701541	1.0659	0.623762	0.797069	1.8122	2.5516	1.71401	2.02594	1.12631	2.19645	1.8385	1.72042	2.5242	2.7104	1.66689	2.3005
TtPIP2;6	1.81336	1.40041	1.80548	1.67308	0.600089	0.917417	1.9879	1.16847	0.474548	0.688617	1.12684	0.763336	0.85687	1.67597	0.907238	1.14669	0.332309	0.62484	0.366919	0.441356	0.302034	0.502588	0.633438	0.479353	1.01368	0.719527	0.600325	0.777843	0.440734	0.283177	0.158752	0.294221
TtPIP2;7	114.985	124.753	111.039	116.926	1295.2	1370.43	1377.87	1347.83	177.279	157.084	162.229	165.53	170.276	140.016	146.908	152.4	233.983	208.729	258.414	233.709	16.6544	15.3292	15.7567	15.9134	71.4236	66.668	71.2273	69.773	37.9494	30.2754	34.9343	34.3864
TtPIP2;8	258.924	278.492	277.473	271.63	1016.04	1038.61	1064.99	1039.88	508.181	481.58	467.038	485.6	415.244	378.86	377.39	390.498	482.943	463.825	587.86	511.543	84.9567	73.8233	73.1912	77.3237	191.694	186.409	188.836	188.98	66.2692	58.6637	55.2188	60.0506
TtPIP2;9	157.677	181.011	162.506	167.065	136.673	135.478	134.149	135.434	313.032	299.044	300.282	304.119	111.148	100.532	103.803	105.161	307.153	299.347	357.813	321.438	26.7393	24.0106	19.4548	23.4016	172.927	154.286	169.659	165.624	23.1569	20.2896	19.128	20.8582
TtPIP2;10	60.4809	65.5231	64.4	63.468	37.5947	27.1355	27.872	30.8674	25.6256	24.1378	22.0825	23.9486	20.0829	20.8604	17.8408	19.5947	37.9248	30.8469	36.6139	35.1285	3.44036	3.56644	3.73076	3.57919	19.3865	15.5929	19.6278	18.2024	1.2621	0.773679	0.84833	0.96137
TtPIP2;11	0.70138	0.63749	0.907833	0.748901	2.07154	2.18672	2.06959	2.10928	0.144015	0	0.143407	0.0958073	5.88071	5.17004	4.97514	5.34197	0	0	0.0361892	0.0120631	21.8582	19.1036	21.4991	20.8203	1.59226	0.597618	0.888153	1.02601	41.059	37.9845	36.2085	38.4173
TtTIP1;1	148.642	149.548	144.093	147.428	262.909	253.164	228.443	248.172	354.118	330.183	346.245	343.515	107.925	96.7603	89.7757	98.1538	359.018	341.218	382.155	360.797	58.9533	57.0631	65.6866	60.5677	158.133	169.307	162.763	163.401	14.1986	11.9238	13.484	13.2021
TtTIP1;2	387.286	470.74	409.499	422.508	1054.8	1113.76	952.825	1040.46	924.082	900.072	912.579	912.244	563.204	503.137	486.601	517.648	784.125	801.771	701.03	762.309	191.428	189.282	205.276	195.329	435.162	400.602	407.161	414.308	45.1652	37.8193	40.0054	40.9966
TtTIP1;3	6.92121	4.86419	7.73742	6.5076	44.0176	39.2495	47.1858	43.4843	2.327	3.17678	4.0137	3.17249	2.15403	3.36913	3.18085	2.90134	2.10156	2.38488	0.96066	1.8157	12.7212	10.2981	10.8584	11.2926	3.24803	4.56953	3.20332	3.67363	11.0375	9.21004	11.0687	10.4387
TtTIP1;4	5.09984	3.43354	6.36725	4.96688	25.4457	28.8062	34.656	29.6359	2.45166	3.42432	3.02062	2.96553	4.87705	3.77505	5.4942	4.71543	3.61468	4.10032	3.38319	3.6994	29.0956	20.7722	19.6809	23.1829	5.42764	4.13844	4.35651	4.64086	6.61338	8.15088	5.96354	6.90927
TtTIP1;5	0	0	0	0	0	0	0	0	0	0	0	0	0	0	0	0	0	0	0	0	0	0.0520292	0	0.0173431	0	0	0	0	0	0	0	0
TtTIP1;6	0	0	0	0	0	0	0	0	0	0	0	0	0	0	0	0	0	0	0	0	0	0	0	0	0	0	0	0	0	0	0	0
TtTIP2;1	75.3412	90.6647	80.3779	82.1279	1640.46	1626.33	1586.15	1617.64	136.923	115.027	143.031	131.66	64.9569	51.8849	53.4741	56.772	302.062	306.3	313.071	307.144	13.7553	12.5652	13.4463	13.2556	48.8952	38.7203	44.6121	44.0759	6.30254	4.49183	4.22318	5.00585
TtTIP2;2	31.5018	37.6281	28.0074	32.3791	458.092	423.559	387.723	423.125	123.455	96.6246	127.349	115.809	13.9164	9.5686	10.3674	11.2841	265.89	286.999	253.784	268.891	1.79037	1.20733	1.42221	1.4733	27.8347	20.1924	25.8212	24.6161	0.926844	0.748639	0.596754	0.757412
TtTIP2;3	0.367177	0.412012	0.284341	0.35451	0.430343	0.175442	0.295677	0.300487	0.753925	1.37232	1.37637	1.16754	0.122898	0.0818307	0.166556	0.123761	0.296563	0.716948	1.30512	0.772877	0.389877	0.133079	0.299276	0.274077	0.0430778	0.56488	0.774922	0.46096	0.0459729	0.0928342	0	0.0462691
TtTIP2;4	0.0411251	0.0415321	0.0409464	0.0412012	0	0	0.0425788	0.0141929	0	0.0419196	0.0420431	0.0279876	0.0412949	0.0824879	0	0.041261	0	0.0425121	0	0.0141707	0.0436676	0.268295	0	0.103988	0	0	0	0	0.0463422	0.0467899	0	0.031044
TtTIP2;5	0.203987	0.618018	0.568683	0.463563	0.172137	0.526327	0.0844791	0.260981	0.209424	0.332685	0.583913	0.375341	0	0	0.208195	0.0693983	0.338929	0.0843468	0.252604	0.225293	0.433196	0.221798	0.0427537	0.232583	0.560012	0.347618	0.34441	0.417347	0.367783	0	0.182153	0.183312
TtTIP2;6	0.93834	0.865225	1.17799	0.99385	0.30124	0.877211	0.464635	0.547695	0.544502	0.37427	0.625622	0.514798	0.163864	0	0.208195	0.124019	0.381295	0.421734	0.168403	0.32381	0.0433196	0.0443596	0.0427537	0.0434777	0.258467	0.434523	0.473563	0.388851	0.137919	0.0928342	0	0.0769177
TtTIP3;1	0	0	0	0	0	0	0	0	0	0	0	0	0.159418	0	0.0405092	0.0666423	0	0	0	0	0	0	0	0	0	0	0	0	0	0	0	0
TtTIP3;2	0	0	0	0	0	0	0.082187	0.0273957	0	0.0404573	0	0.0134858	11.7969	10.9464	14.7048	12.4827	0	0	0	0	0.29501	0.0863121	0	0.127107	0	0	0	0	2.54936	2.12241	2.34805	2.33994
TtTIP4;1	0.441386	0.178302	0.219734	0.279807	0.465586	0.0949052	0	0.186831	0.725039	0.71986	0.0902477	0.511716	0.177283	0.0442661	0.270294	0.163948	2.29179	2.37262	2.96065	2.54169	0	0.239962	0	0.0799875	0.699086	0.188043	0.978116	0.621749	0.149214	0.0502185	0.0985356	0.0993227
TtTIP4;2	6.58295	8.82311	4.85508	6.75371	1.24304	1.35428	1.09387	1.2304	26.241	18.515	22.5576	22.4379	3.50909	4.40132	2.48842	3.46628	37.725	27.3039	32.834	32.621	4.65996	3.7556	3.57706	3.99754	13.2582	10.6468	9.81961	11.2416	8.6544	5.59418	6.44079	6.89646
TtTIP5;1	0	0	0	0	0	0	0	0	0	0	0	0	0	0	0	0	0	0	0	0	0	0	0	0	0	0	0	0	0	0	0	0
TtTIP5;2	0	0	0	0	0	0	0	0	0	0	0	0	0	0	0	0	0	0	0	0	0	0	0	0	0	0	0	0	0	0	0	0
TtNIP1;1	5.65811	7.15141	5.46073	6.09009	3.25879	4.70215	5.24716	4.4027	10.7982	8.81036	7.7717	9.12674	2.92788	3.93384	4.21598	3.69257	10.1653	10.3343	9.17023	9.88995	4.57044	5.54826	4.03784	4.71885	9.96952	11.1653	9.45055	10.1951	2.03403	3.15951	2.75098	2.64817
TtNIP1;2	11.2121	7.99275	11.5781	10.261	4.72341	4.10505	6.00188	4.94345	14.6827	11.5348	11.7108	12.6428	10.631	5.88335	7.08568	7.86667	12.6886	9.93963	11.2837	11.304	9.84119	12.644	9.93089	10.8054	12.7551	10.4998	13.8461	12.367	4.73303	5.09471	4.92077	4.91617
TtNIP2;1	0	0	0	0	0	0	0	0	0	0	0	0	0	0	0	0	0	0	0	0	0	0	0	0	0	0	0	0	0	0	0	0
TtNIP2;2	0	0	0	0	0	0	0	0	0	0	0	0	0	0	0	0	0	0	0	0	0	0	0	0	0	0	0	0	0	0	0	0
TtNIP2;3	0	0	0	0	0	0	0	0	0	0	0	0	0	0	0	0	0	0	0	0	0	0	0	0	0	0	0	0	0	0	0	0
TtNIP3;1	27.0708	25.3707	25.8949	26.1121	3.36382	3.23794	3.99873	3.5335	4.9837	4.04517	3.07904	4.03597	7.00914	8.27976	8.02839	7.77243	0.8095	1.61164	2.0842	1.50178	2.18217	2.31161	1.52242	2.0054	4.37739	5.39665	3.70166	4.4919	17.9676	18.0203	17.6396	17.8758
TtNIP4;1	13.0918	16.3631	16.0033	15.1528	0.683646	1.25419	0.469715	0.802517	0.465769	1.71764	1.2589	1.14744	7.0285	5.32987	3.96888	5.44242	2.0864	1.47393	1.00322	1.52118	4.06026	2.46645	1.4263	2.651	2.39518	2.13989	0.889089	1.80805	5.47747	3.68693	1.88091	3.68177
TtNIP4;2	0.501266	0.39775	0.570387	0.489801	1.1708	0.615888	0.148282	0.644991	0.624903	0.401461	0.805287	0.61055	3.05597	2.94447	1.93679	2.64575	0.855173	0.851283	0.258639	0.655032	0.646311	0.233586	1.53839	0.806094	0.0756121	0.610155	0.226696	0.304154	0.887631	0.61105	0.519551	0.672744
TtNIP5;1	8.92731	10.4741	7.02586	8.80908	5.88549	5.08108	4.00978	4.99212	10.3783	13.5158	12.4148	12.103	5.60261	7.86689	4.28774	5.91908	8.52074	8.007	6.29971	7.60915	3.17136	2.17689	2.78598	2.71141	17.6397	15.0314	18.3215	16.9975	12.9446	9.41018	9.92809	10.761
TtNIP5;2	4.14245	4.08305	2.01274	3.41275	4.92889	2.70771	2.67627	3.43762	4.79723	5.2021	5.18355	5.06096	8.85155	7.37826	9.43668	8.5555	3.92318	3.66554	2.73586	3.44153	2.428	1.2972	0.868219	1.53114	6.26357	3.95317	5.77012	5.32895	6.31109	3.318	5.5856	5.07156
TtNIP6;1	6.94867	7.55467	6.55436	7.01923	8.62726	6.43383	6.1272	7.06276	7.71414	5.59177	8.59932	7.30174	3.87261	2.30069	4.3095	3.49426	1.6227	2.50891	1.68115	1.93759	1.69453	1.08451	1.98597	1.58833	6.35412	3.15156	5.57835	5.02801	5.91946	4.04748	3.37708	4.44801
TtNIP6;2	9.97155	9.76509	6.15083	8.62916	5.87891	3.39294	4.72751	4.66645	12.7536	7.87126	9.61064	10.0785	7.3157	7.273	5.79109	6.79326	3.62598	3.50537	4.12296	3.75144	4.31364	4.38069	3.72953	4.14129	7.7283	7.18758	10.1681	8.36134	8.09636	6.22644	7.60759	7.31013
TtNIP7;1	0	0	0	0	0	0	0	0	0	0	0	0	0	0	0	0	0	0	0	0	0	0	0	0	0	0	0	0	0	0	0	0
TtNIP7;2	0	0	0	0	0	0	0	0	0	0	0	0	0	0	0	0	0	0	0	0	0	0	0	0	0	0	0	0	0	0	0	0
TtNIP7;3	0	0	0	0	0	0	0	0	0	0	0	0	0	0	0	0	0	0	0	0	0	0	0	0	0	0	0	0	0	0	0	0
TtNIP8;1	0	0	0	0	0.0662675	0	0	0.0220892	0	0	0	0	0	0	0	0	0	0	0	0	0	0	0	0	0	0	0	0	0	0	0	0
TtNIP8;2	0	0	0	0	0	0	0	0	0.0322487	0	0	0.0107496	0.0315412	0	0	0.0105137	0	0	0	0	0	0	0	0	0	0	0	0	0	0	0	0
TtNIP8;3	0	0	0	0	0	0	0	0	0	0	0	0	0	0	0	0	0	0	0	0	0	0	0	0	0	0	0	0	0	0	0	0
TtNIP8;4	0	0	0	0	0	0	0	0	0	0	0	0	0	0	0	0	0	0	0	0	0	0	0	0	0	0	0	0	0	0	0	0
TtSIP1;1	25.1686	23.8394	18.4259	22.478	51.0582	45.0087	48.9231	48.33	71.6915	65.688	68.7405	68.7067	78.0061	82.3229	79.6655	79.9982	45.9094	44.5102	55.2129	48.5441	61.615	54.777	62.7063	59.6994	52.9337	49.0136	55.2444	52.3972	80.311	81.9292	75.7877	79.3426
TtSIP1;2	22.9478	18.108	19.859	20.3049	36.0487	39.9242	35.1701	37.0477	74.8581	73.1497	65.7975	71.2684	42.7815	40.2954	43.0227	42.0332	59.5327	52.2899	60.9845	57.6024	49.4754	48.6956	49.6479	49.273	33.1324	31.7997	32.8949	32.609	28.5004	28.5419	24.9718	27.3381
TtSIP2;1	4.0698	5.83367	4.44426	4.78258	0.64625	2.3053	1.54048	1.49734	9.34495	7.09247	6.97916	7.80553	2.37287	2.19439	2.09921	2.22216	5.95316	6.15227	7.85771	6.65438	2.64861	1.66538	3.94394	2.75264	4.25108	4.94056	3.23252	4.14139	3.99434	3.38567	2.78426	3.38809
TtSIP2;2	1.31284	1.41422	2.30927	1.67878	1.15402	0.564564	0.226541	0.648374	2.6058	3.65775	1.47636	2.57997	0.790957	1.0972	0.982608	0.95692	2.04498	1.80949	3.92885	2.59444	2.04454	1.23714	1.83439	1.70536	1.47864	2.47028	2.35512	2.10135	1.82458	1.69284	2.1981	1.90517
TtXIP1;1	1.61687	2.09342	1.98134	1.89721	8.92116	8.02275	8.3701	8.43801	0.0851261	0	0.466219	0.183782	0.999103	1.28892	0.888579	1.05887	0.301365	0.428564	0.213912	0.314614	0.572275	2.16374	1.6944	1.47681	2.23255	1.67793	1.57494	1.82847	2.38259	3.632	3.74834	3.25431
TtXIP1;2	6.01052	5.4598	5.60445	5.69159	12.8814	10.9748	13.5984	12.4849	1.50187	1.55597	1.6906	1.58281	9.86731	8.96211	8.60129	9.14357	1.71727	1.67659	1.44397	1.61261	7.29384	7.054	6.43205	6.92663	1.91402	1.15162	1.47658	1.51407	18.9573	16.3544	16.7902	17.3673
