# Supplementary material for: Molecular characterization of Tetragonia tetragonoides (Pall.) aquaporin (AQP) members and their roles in the response to combined high salinity-alkalinity-drought and heat stress
Source: Research Square preprint supplement (doi:10.21203/rs.3.rs-7136705/v1), 2025-07-30
Supplement: Supplementary file 6 [file e17dbd601ee5911da32a42ea.xlsx]

## Sheet: CEs of TtAQPs' promoters
	TtPIP1;1-promoter	TtPIP1;2-promoter	TtPIP1;3-promoter	TtPIP1;4-promoter	TtPIP2;1-promoter	TtPIP2;2-promoter	TtPIP2;3-promoter	TtPIP2;4-promoter	TtPIP2;5-promoter	TtPIP2;6-promoter	TtPIP2;7-promoter	TtPIP2;8-promoter	TtPIP2;9-promoter	TtPIP2;10-promoter	TtPIP2;11-promoter	TtTIP1;1-promoter	TtTIP1;2-promoter	TtTIP1;3-promoter	TtTIP1;4-promoter	TtTIP1;5-promoter	TtTIP1;6-promoter	TtTIP2;1-promoter	TtTIP2;2-promoter	TtTIP2;3-promoter	TtTIP2;4-promoter	TtTIP2;5-promoter	TtTIP2;6-promoter	TtTIP3;1-promoter	TtTIP3;2-promoter	TtTIP4;1-promoter	TtTIP4;2-promoter	TtTIP5;1-promoter	TtTIP5;2-promoter	TtNIP1;1-promoter	TtNIP1;2-promoter	TtNIP2;1-promoter	TtNIP2;2-promoter	TtNIP2;3-promoter	TtNIP3;1-promoter	TtNIP4;1-promoter	TtNIP4;2-promoter	TtNIP5;1-promoter	TtNIP5;2-promoter	TtNIP6;1-promoter	TtNIP6;2-promoter	TtNIP7;1-promoter	TtNIP7;2-promoter	TtNIP7;3-promoter	TtNIP8;1-promoter
MYB	4	4	1	3	4	6	3	6	6	2	3	1	0	3	3	5	6	3	4	3	7	5	7	3	3	3	2	4	6	3	1	7	2	3	3	0	0	0	6	3	4	3	7	6	6	7	7	9	5
ABRE	2	0	3	1	2	1	2	1	0	2	3	1	4	2	6	3	1	5	3	4	4	0	0	1	0	2	2	3	1	5	2	2	1	3	1	3	3	3	1	1	1	1	2	1	2	1	1	1	3
MYC	6	6	7	8	1	4	4	4	2	2	5	5	1	1	3	7	4	1	0	4	6	6	7	7	2	0	2	5	4	4	6	3	6	5	5	2	2	2	4	0	4	5	2	3	0	3	3	1	6
ARE	1	4	8	5	2	4	2	4	3	3	1	2	2	4	2	0	4	1	2	4	2	6	4	4	3	2	1	1	4	2	1	3	2	3	4	5	5	5	4	3	2	0	2	1	1	0	0	0	2
HSE	1	2	9	9	0	3	4	2	4	4	7	2	5	4	4	3	11	7	5	3	1	4	2	8	3	1	3	2	8	0	1	3	3	2	4	2	2	2	5	3	1	4	1	3	2	4	4	2	5
TGACG-motif	0	1	3	1	1	0	3	0	0	1	5	2	0	2	2	0	0	0	0	2	2	0	2	5	1	2	2	2	0	3	2	0	2	2	3	1	2	1	0	2	3	3	1	1	0	1	1	1	1
ERE	0	3	0	0	1	1	1	1	0	1	1	0	2	1	1	1	1	1	2	0	0	1	0	2	2	1	1	1	1	0	0	0	0	1	1	1	1	1	1	3	3	2	1	0	1	1	1	1	1
CGTCA-motif	0	1	3	1	1	0	3	0	0	1	5	2	0	2	2	0	0	0	0	2	2	0	2	5	1	2	2	2	0	3	2	0	2	2	3	1	2	1	0	2	3	3	1	1	0	1	1	1	1
TC-rich repeats	0	0	1	0	0	0	0	0	0	0	2	0	0	0	0	0	0	0	1	2	0	0	0	0	0	0	0	0	0	1	1	0	0	0	0	0	0	0	0	1	1	0	0	1	0	2	2	0	0
WUN-motif	0	0	1	3	0	0	1	0	0	0	0	0	1	1	0	1	0	1	2	0	1	1	0	0	0	1	1	0	0	0	0	1	1	0	1	1	1	1	0	1	0	0	0	0	0	2	2	0	0
TCA-element	0	0	1	0	0	1	0	1	0	0	0	1	0	0	0	2	1	1	0	1	0	1	0	1	0	1	0	0	1	1	0	2	1	2	1	0	0	0	1	0	1	2	1	2	1	3	3	1	0
TATC-box	0	0	1	1	0	0	0	0	0	1	0	0	0	1	0	0	0	0	0	0	0	0	0	0	0	0	0	0	0	0	0	0	0	0	1	0	0	0	0	1	0	0	0	0	0	0	0	0	0
MBS	0	0	0	2	1	1	0	1	0	0	0	0	0	1	2	1	1	3	2	2	1	2	0	1	2	0	0	4	1	0	0	1	1	0	0	0	0	0	1	1	1	1	0	1	1	2	2	2	0
P-box	0	0	0	0	0	1	0	1	0	0	1	2	0	0	1	0	1	1	0	1	1	1	1	0	0	0	0	0	1	0	0	0	0	3	1	2	2	2	1	1	1	1	1	2	2	0	0	0	0
TGA-element	0	0	0	0	0	1	0	1	0	0	0	0	0	0	3	1	1	0	1	0	0	0	0	0	0	0	0	0	1	0	1	0	0	3	2	0	0	0	1	1	1	0	0	0	1	1	1	1	1
AuxRR-core	0	0	0	0	2	1	0	1	0	0	0	0	0	0	0	0	1	0	1	0	1	0	0	0	1	0	0	0	1	0	0	0	0	0	0	0	0	0	1	0	0	0	0	0	0	0	0	0	0
[truncated: 9 more columns]

## Sheet: HSE
HSE	Note
5′-CTAGAA-3′
5′-TTCAGA-3′
5′-TCTAGA-3′
5′-TCCAGA-3′
5′-TCTGGA-3′
5′-CGCTTC-3′
5′-GAAGCG-3′
5′-GGTTCG-3′
5′-CGAACC-3′
5′-TTCCAG-3′
5′-CTGGAA-3′
5′-TTCNNGAA-3′	N presents any nucleotide base "A, T, G, or C"
